# Supplementary material for: Palladium-catalyzed diastereoselective cross-coupling of two aryl halides via C–H activation: synthesis of chiral eight-membered nitrogen heterocycles
Source: Royal Society of Chemistry journal article supplement (doi:10.1039/d1cc00398d), 2021-01-01

## Supporting Information

# Palladium-Catalyzed Diastereoselective Cross-Coupling of Two Aryl Halides via C–H Activation: Synthesis of Chiral Eight-Membered Nitrogen Heterocycles

Cang Cheng, Xiang Zuo, Dongdong Tu, Bin Wan and Yanghui Zhang\*

*School of Chemical Science and Engineering, Shanghai Key Laboratory of Chemical Assessment and Sustainability, Tongji University, 1239 Siping Road, Shanghai 200092, China*

*Corresponding Author: Yanghui Zhang*

*E-mail: zhangyanghui@tongji.edu.cn*

### Table of Contents

|                                                                                                                     |     |
|---------------------------------------------------------------------------------------------------------------------|-----|
| 1. General Information: .....                                                                                       | S2  |
| 2. Optimization of Reaction Conditions: .....                                                                       | S2  |
| 3. General Procedures for the Synthesis of Substrates <b>4</b> . .....                                              | S3  |
| 4. General Procedures for the Synthesis of Eight-Membered Nitrogen Heterocycles.....                                | S4  |
| 5. Preliminary Mechanistic Studies and Bromination of <b>5aa</b> .....                                              | S4  |
| 6. Procedure for the Synthesis of a Chiral Phosphoramidite Ligand and Application in the Asymmetric Reactions. .... | S5  |
| 7. Characterization of the Substrates .....                                                                         | S6  |
| 8. Characterization of the Products. ....                                                                           | S12 |
| 9. Crystal Structure and Corresponding Date of <b>5aa</b> and <b>5aa-B</b> .....                                    | S41 |
| 10. References .....                                                                                                | S43 |
| 11. NMR Spectra .....                                                                                               | S44 |

## 1. General Information:

Pd(OAc)<sub>2</sub> was purchased from Strem Chemicals. <sup>1</sup>H NMR and <sup>13</sup>C NMR spectra were recorded on Bruker ARX400 instrument (400 MHz) or Bruker DRX-600 instrument (600 MHz). High resolution mass spectra were measured on Bruker MicroTOF II ESI-TOF mass spectrometer. Optical rotations were taken on AUTOPOL VI. Enantiomeric excesses were determined by HPLC analysis on a chiral stationary phase using a Shimadzu instrument. NMR spectra were recorded in CDCl<sub>3</sub>. <sup>1</sup>H NMR spectra were referenced to residual CHCl<sub>3</sub> at 7.26 ppm, and <sup>13</sup>C NMR spectra were referenced to the central peak of CDCl<sub>3</sub> at 77.0 ppm. Chemical shifts (δ) are reported in ppm, and coupling constants (*J*) are in Hertz (Hz). Multiplicities are reported using the following abbreviations: s = singlet, d = doublet, t = triplet, q = quartet, m = multiplet.

2-Iodobiphenyls (**1**) were synthesized by following the reported procedures.<sup>[1]</sup> 2-Bromobenzylamine derivatives (**2a**, **2p** - **2r**, **4a**) are commercially available. Other 2-bromobenzylamines derivative (**2b** - **2o**) were synthesized by following the reported procedure.<sup>[2]</sup>

## 2. Optimization of Reaction Conditions:

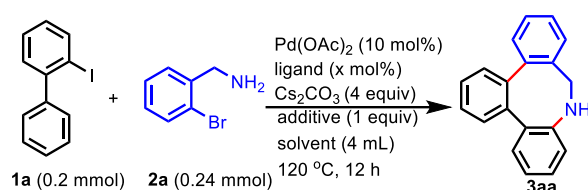

| entry | ligand (x mol%)                                         | additive | solvent     | yield (%) <sup>[a]</sup> |
|-------|---------------------------------------------------------|----------|-------------|--------------------------|
| 1     | -                                                       |          | DMF         | -                        |
| 2     | PPh <sub>3</sub> (20)                                   |          | DMF         | 45                       |
| 3     | PCy <sub>3</sub> (20)                                   |          | DMF         | 27                       |
| 4     | P(4-MeC <sub>6</sub> H <sub>4</sub> ) <sub>3</sub> (20) |          | DMF         | 31                       |
| 5     | P(o-tol) <sub>3</sub> (20)                              |          | DMF         | trace                    |
| 6     | BINAP (12)                                              |          | DMF         | 49                       |
| 7     | Dppe (12)                                               |          | DMF         | -                        |
| 8     | Dppp (12)                                               |          | DMF         | -                        |
| 9     | Dppb (12)                                               |          | DMF         | trace                    |
| 10    | Dppf (12)                                               |          | DMF         | 28                       |
| 11    | DPEphos (12)                                            |          | DMF         | 58                       |
| 12    | Xantphos (12)                                           |          | DMF         | 60                       |
| 13    | Xantphos (12)                                           | TBACl    | DMF         | 48                       |
| 14    | Xantphos (12)                                           | TBAB     | DMF         | 60                       |
| 15    | Xantphos (12)                                           | TBAI     | DMF         | 77                       |
| 16    | Xantphos (12)                                           | TBAI     | DMA         | 85                       |
| 17    | Xantphos (12)                                           | TBAI     | DMSO        | 50                       |
| 18    | Xantphos (12)                                           | TBAI     | toluene     | 46                       |
| 19    | Xantphos (12)                                           | TBAI     | MeCN        | 45                       |
| 20    | Xantphos (12)                                           | TBAI     | 1,4-dioxane | 20                       |

|    |               |      |     |                                                               |
|----|---------------|------|-----|---------------------------------------------------------------|
| 21 | Xantphos (12) | TBAI | DMA | 93% <sup>[b]</sup> (91% <sup>[c]</sup> , 62% <sup>[d]</sup> ) |
| 22 | Xantphos (12) | TBAI | DMA | 78 <sup>[b],[e]</sup>                                         |
| 23 | Xantphos (12) | TBAI | DMA | Trace <sup>[b],[f]</sup>                                      |
| 24 | Xantphos (12) | TBAI | DMA | Trace <sup>[b],[g]</sup>                                      |

[a] The yields were determined by <sup>1</sup>H NMR analysis of the crude reaction mixture using CHCl<sub>2</sub>:CHCl<sub>2</sub> as the internal standard. [b] 130 °C. [c] Isolated yield. [d] (2-Chlorophenyl)methanamine was used. [e] K<sub>2</sub>CO<sub>3</sub> instead of Cs<sub>2</sub>CO<sub>3</sub>. [f] Na<sub>2</sub>CO<sub>3</sub> instead of Cs<sub>2</sub>CO<sub>3</sub>. [g] CsOAc instead of Cs<sub>2</sub>CO<sub>3</sub>.

### 3. General Procedures for the Synthesis of Substrates 4.

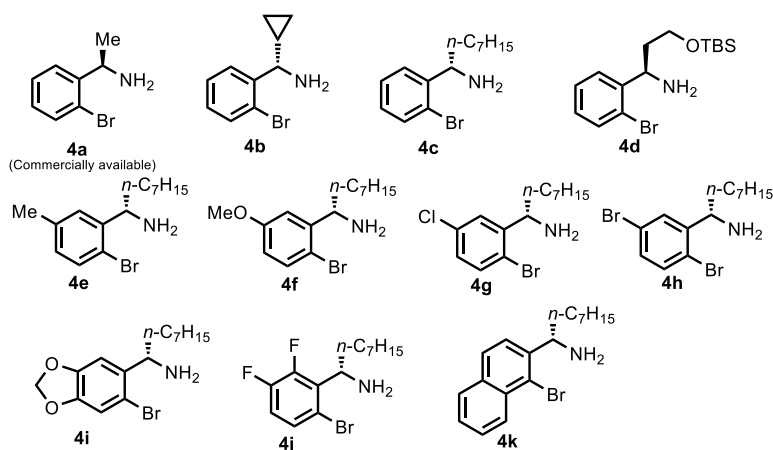

#### 3.1 General procedure for the synthesis of substrates 4b, 4c and 4e - 4k <sup>[3]</sup>.

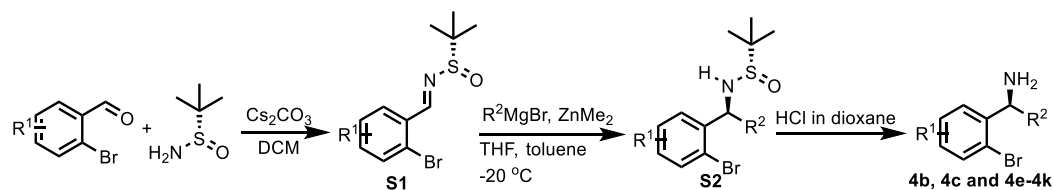

**Step 1:** To dry DCM (20 mL) was added aldehyde (5 mmol, 1.0 equiv), (S)-2-methylpropane-2-sulfonamide (1.2 equiv) and anhydrous Cs<sub>2</sub>CO<sub>3</sub> (2.0 equiv). The reaction vessel was fitted with a dry reflux condenser, and the reaction was heated to reflux. Once being complete as monitored by TLC, the mixture was cooled to room temperature, and then the contents were filtered over Celite® which was subsequently washed with DCM. The collected filtrate was concentrated in vacuo. The obtained residue was purified via flash column chromatography on silica gel with petroleum ether/ethyl acetate to afford sulfinyl imines **S1**.

**Step 2:** To a solution of R<sup>2</sup>MgBr (1.0 M in THF, 6.0 mmol, 1.5 equiv) at room temperature was added a solution of ZnMe<sub>2</sub> (1.0 M in toluene, 6.0 mmol, 1.5 equiv) under nitrogen and the mixture was stirred for 30 min before cooling to -20 °C. This mixture was then added to a solution of sulfinyl imines **S1** (4.0 mmol, 1.0 equiv) in anhydrous THF (20 mL) at -20 °C and the resulting mixture was stirred for 3 h before slowly warming to 0 °C. Once being complete as monitored by TLC, the mixture quenched carefully with saturated aqueous NH<sub>4</sub>Cl solution, then the insoluble salts were filtered. The resulting clear aqueous layer was extracted with CH<sub>2</sub>Cl<sub>2</sub> for three times. The combined organic layers were dried over MgSO<sub>4</sub>, filtered and concentrated in vacuo. The obtained residue was purified via flash column chromatography on silica gel using the indicated mobile phase to afford **S2**.

**Step 3:** A flame-dried flask was cooled under a stream of N<sub>2</sub> and charged with a 0.2 M solution of compound **S2** (1.0 mmol, 1.0 equiv) in methanol. A 4 M solution of HCl in dioxane (4.0 equiv) was then added and the resulting solution was stirred at room temperature. Once being complete as monitored by TLC, the reaction mixture was basified to pH > 11 with 10 M NaOH

and extracted with CH<sub>2</sub>Cl<sub>2</sub> for three times. The combined organic phases were washed with brine, dried over Na<sub>2</sub>SO<sub>4</sub>, filtered and concentrated in vacuo. The obtained residue was purified via flash column chromatography on silica gel using the indicated mobile phase to afford **4**.

### 3.2 Procedure for the synthesis of substrate **4d** [4].

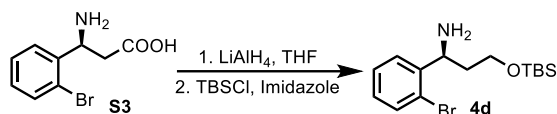

To a solution of lithium aluminium hydride (4.0 mmol, 1.0 equiv) suspended in anhydrous THF (6 mL) at 0 °C was added **S3** (4.0 mmol, 1.0 equiv) in portions. The reaction mixture was stirred at room temperature for 2 h. The reaction was quenched with aqueous NaOH solution (1.0 M). The solids were filtered off, rinsed with EtOAc and the combined organic phases were concentrated in vacuo to provide the amino alcohol, which was used directly in the next step without further purification. To a solution of the newly prepared amino alcohol (4.0 mmol, 1.0 equiv) and imidazole (12.0 mmol, 3.0 equiv) in CH<sub>2</sub>Cl<sub>2</sub> (12 mL) was added TBSCl (8.0 mmol, 2.0 equiv). The reaction mixture was stirred at room temperature for 2 h, and then washed with water and brine. The organic layer was dried over anhydrous Na<sub>2</sub>SO<sub>4</sub>, filtered and concentrated in vacuo. The obtained residue was purified via flash column chromatography on silica gel (petroleum ether/ethyl acetate = 2/1) to afford amine **4d** (0.69 g, 50% yield) as a colorless oil.

## 4. General Procedures for the Synthesis of Eight-Membered Nitrogen Heterocycles.

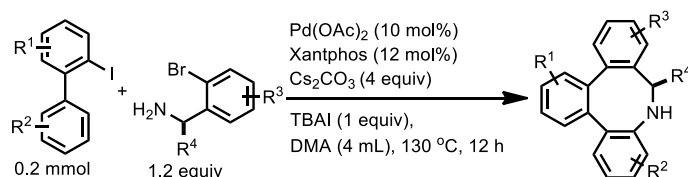

A 25 mL Schlenk-type tube (with a Teflon screw cap and a side arm) equipped with a magnetic stir bar was charged with Pd(OAc)<sub>2</sub> (10 mol %), Xantphos (12 mol %), Cs<sub>2</sub>CO<sub>3</sub> (0.8 mmol, 4.0 equiv), TBAI (0.2 mmol, 1 equiv), 2-iodobiphenyls (0.2 mmol, 1.0 equiv), 2-bromobenzylamines (0.24 mmol, 1.2 equiv) and DMA (4 mL). The reaction mixture was frozen with liquid nitrogen and then the tube was evacuated and backfilled with nitrogen (6 times). The mixture was stirred at 130 °C (oil bath heating) for 12 hours. After cooling to room temperature, the reaction mixture was diluted with EtOAc (15 mL), washed with brine (3 times), dried over Na<sub>2</sub>SO<sub>4</sub> and concentrated in vacuo. The residue was purified by preparative silica gel TLC with petroleum ether/ethyl acetate to give eight-membered nitrogen heterocycles.

## 5. Preliminary Mechanistic Studies and Bromination of **5aa**.

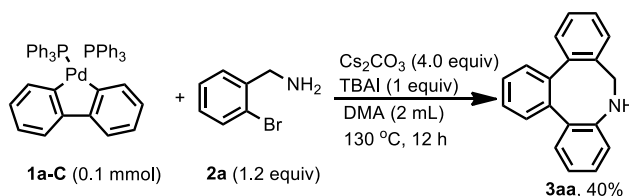

**Procedure for preliminary mechanistic studies:** A 25 mL Schlenk-type tube (with a Teflon screw cap and a side arm) equipped with a magnetic stir bar was charged with biphenylpalladacycle **1a-C** (0.1 mmol, 78.2 mg, 1.0 equiv), Cs<sub>2</sub>CO<sub>3</sub> (0.4 mmol, 130.3 mg, 4.0 equiv), TBAI (0.1 mmol, 36.9 mg, 1 equiv), 2-bromobenzylamines **2a** (0.12 mmol, 1.2 equiv) and DMA (2 mL). The reaction mixture was frozen with liquid nitrogen and then the tube was evacuated and backfilled with nitrogen (6 times). The mixture was stirred at 130 °C (oil bath heating) for 12 hours. After cooling to room temperature, the reaction mixture was diluted with EtOAc (15 mL), washed with brine (3 times), dried over Na<sub>2</sub>SO<sub>4</sub> and concentrated in vacuo. The

residue was purified by preparative silica gel TLC with petroleum ether/ethyl acetate (20/1) to give **3aa** (10.3 mg, 40% yield) as a colorless oil.

Based on the above experimental results, a tentative mechanism was proposed as shown below for the eight-membered ring-forming reaction. The catalytic cycle starts with the oxidative addition of compound **1** to Pd(0) to yield Pd(II) species **A**. The subsequent intramolecular C–H activation delivers C,C-palladacycle **B** as the key intermediate. A second oxidative addition of 2-bromobenzylamine derivatives to **B** affords chelated Pd(IV) species **C**. Nine-membered pallada(II)cycle **D** was then formed by C–C coupling after the reductive elimination of intermediate **C**. Finally, C–N coupling by reductive elimination affords eight-membered cyclic products.

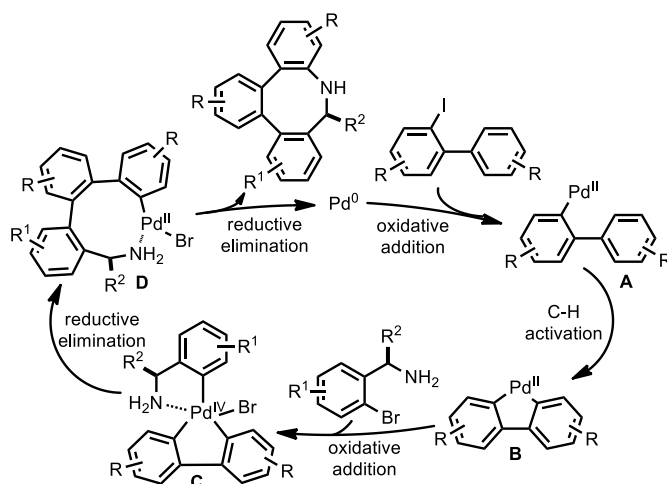

**Bromination of 5aa:** To a solution of **5aa** (0.2 mmol) in DMF (2 mL) was added NBS (0.5 mmol, 2.5 equiv), and the mixture was stirred at room temperature for 4 h. The reaction mixture was diluted with EtOAc (15 mL), washed with brine (3 times), dried over Na<sub>2</sub>SO<sub>4</sub> and concentrated in vacuo. The residue was purified by preparative silica gel TLC with petroleum ether/ethyl acetate (20/1) to give **5aa-B** (75.1 mg mg, 88% yield) as a white solid.

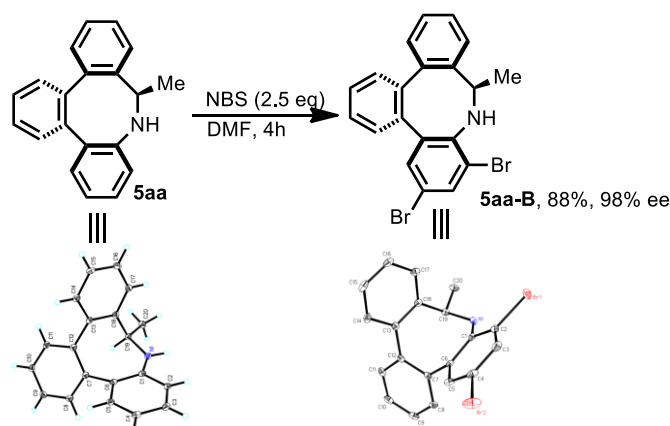

## 6. Procedure for the Synthesis of a Chiral Phosphoramidite Ligand and Application in Asymmetric Reactions.

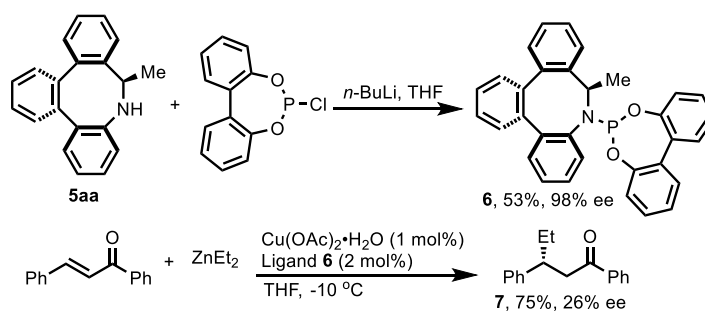

The ligands were prepared according to a modified procedure<sup>[5]</sup>: A solution of (R)-10-methyl-9,10-dihydrotribenzo[b,d,f]azocine **5aa** (0.5 mmol, 135.6 mg, 1.0 equiv) in anhydrous THF (5 mL) was cooled to  $-78^{\circ}\text{C}$  under nitrogen, and then a solution of *n*-butyllithium in hexanes (1.6 M, 0.6 mmol) was added carefully. The resulting mixture was stirred for 30 min, after which a solution of 6-chlorodibenzo[d,f][1,3,2]dioxaphosphepine (0.55 mmol, 1.1 equiv) in THF (2 mL) was added dropwise. The reaction mixture was allowed to warm up to room temperature and stirred for 2 h. The solvent was removed under reduced pressure and the residue purified by flash chromatography over silica gel with petroleum ether/ethyl acetate (15/1) to give phosphoramidite **6** (128.5 mg, 53% yield) as a white solid.

**Copper-catalyzed asymmetric conjugate addition to chalcone**<sup>[6]</sup>: A solution of  $\text{Cu}(\text{OAc})_2 \cdot \text{H}_2\text{O}$  (0.006 mmol, 1.2 mg) and ligand (0.012 mmol, 5.8 mg) in anhydrous toluene (4 mL) was stirred under nitrogen at room temperature for 30 min. The solution was cooled to  $-10^{\circ}\text{C}$ , and chalcone (0.20 mmol, 41.6 mg) and  $\text{ZnEt}_2$  solution in hexane (0.3 mmol, 0.3 mL) were added dropwise under nitrogen. After 8 h at  $-10^{\circ}\text{C}$ , the reaction was quenched by aqueous  $\text{NH}_4\text{Cl}$  and the mixture was extracted with EtOAc for three times. The combined organic phases were washed with brine, dried over  $\text{Na}_2\text{SO}_4$ , filtered and concentrated in vacuo. The obtained residue was purified via flash column chromatography on silica gel (petroleum ether/ethyl acetate = 15/1) to afford **7** (35.6 mg, 75% yield) as a white solid.

## 7. Characterization of the Substrates

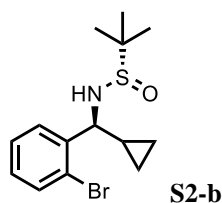

**(S)-N-((S)-(2-bromophenyl)(cyclopropyl)methyl)-2-methylpropane-2-sulfinamide S2-b.** The crude product was formed as 8:1 mixture of diastereomers as judged by  $^1\text{H}$  NMR analysis. Purification by silica gel column chromatography with petroleum ether/ethyl acetate 10/1  $\rightarrow$  5/1 to afford the title compound (0.52 g, 45% yield) as a colorless oil with  $>20:1$  dr.  $[\alpha]_{\text{D}}^{25} = +74.4$  ( $c = 0.2$ ,  $\text{CHCl}_3$ ).

$^1\text{H}$  NMR (600 MHz,  $\text{CDCl}_3$ )  $\delta$  7.55 (dd,  $J = 8.0, 1.3$  Hz, 1H), 7.46 (dd,  $J = 7.8, 1.7$  Hz, 1H), 7.31 (td,  $J = 7.5, 1.3$  Hz, 1H), 7.14 – 7.12 (m, 1H), 4.23 (dd,  $J = 9.2, 3.2$  Hz, 1H), 3.60 (d,  $J = 3.2$  Hz, 1H), 1.31 – 1.26 (m, 1H), 1.19 (s, 9H), 0.71 – 0.67 (m, 1H), 0.57 – 0.45 (m, 3H).

$^{13}\text{C}$  NMR (101 MHz,  $\text{CDCl}_3$ )  $\delta$  141.0, 133.0, 129.4, 128.9, 127.5, 123.8, 62.3, 55.7, 22.5, 18.5, 5.1, 3.5.

**HRMS** (ESI)  $m/z$ :  $[\text{M} + \text{H}]^+$  calcd for  $\text{C}_{14}\text{H}_{21}\text{BrNOS}$  330.0522; found 330.0513.

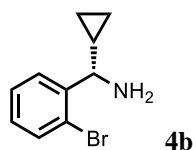

**(S)-(2-bromophenyl)(cyclopropyl)methanamine 4b:** Colorless oil, actual mass 0.18 mg, 82% yield, (eluent: petroleum ether/ethyl acetate = 3:1).  $[\alpha]_{\text{D}}^{25} = -6.5$  ( $c = 0.2$ ,  $\text{CHCl}_3$ ).

$^1\text{H}$  NMR (600 MHz,  $\text{CDCl}_3$ )  $\delta$  7.59 (dd,  $J = 7.8, 1.7$  Hz, 1H), 7.52 (dd,  $J = 8.0, 1.3$  Hz, 1H), 7.32 (td,  $J = 7.5, 1.3$  Hz, 1H), 7.09 (td,  $J = 7.6, 1.7$  Hz, 1H), 3.76 (d,  $J = 8.3$  Hz, 1H), 1.23 – 1.14 (m, 1H), 0.65 – 0.60 (m, 1H), 0.46 – 0.33 (m, 3H).

$^{13}\text{C}$  NMR (101 MHz,  $\text{CDCl}_3$ )  $\delta$  144.6, 132.7, 128.3, 128.1, 127.7, 123.5, 58.3, 18.0, 4.1, 2.2.

**HRMS** (ESI)  $m/z$ :  $[\text{M} + \text{H}]^+$  calcd for  $\text{C}_{10}\text{H}_{13}\text{BrN}$  226.0226; found 226.0199.

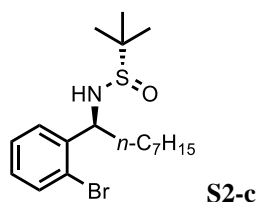

**(S)-N-((S)-1-(2-bromophenyl)octyl)-2-methylpropane-2-sulfonamide S2-c.** The crude product was formed as 20:1 mixture of diastereomers as judged by  $^1\text{H}$  NMR analysis. Purification by silica gel column chromatography with petroleum ether/ethyl acetate 10/1  $\rightarrow$  5/1 to afford the title compound (0.86 g, 58% yield) as a colorless oil with >20:1 dr.  $[\alpha]_{\text{D}}^{25} = +16.8$  ( $c = 0.2$ ,  $\text{CHCl}_3$ ).

$^1\text{H}$  NMR (600 MHz,  $\text{CDCl}_3$ )  $\delta$  7.52 (dd,  $J = 8.0, 1.2$  Hz, 1H), 7.36 (dd,  $J = 7.8, 1.8$  Hz, 1H), 7.30 (td,  $J = 7.5, 1.3$  Hz, 1H), 7.11 (td,  $J = 7.6, 1.7$  Hz, 1H), 4.79 – 4.76 (m, 1H), 3.62 (d,  $J = 6.2$  Hz, 1H), 1.90 – 1.77 (m, 2H), 1.36 – 1.21 (m, 10H), 1.20 (s, 9H), 0.84 (t,  $J = 7.1$  Hz, 3H).

$^{13}\text{C}$  NMR (151 MHz,  $\text{CDCl}_3$ )  $\delta$  141.7, 133.1, 128.8, 128.3, 127.6, 123.4, 58.3, 56.0, 36.3, 31.7, 29.2, 29.0, 25.5, 22.5, 22.5, 14.0.

**HRMS** (ESI)  $m/z$ :  $[\text{M} + \text{H}]^+$  calcd for  $\text{C}_{18}\text{H}_{31}\text{BrNOS}$  388.1304; found 388.1300.

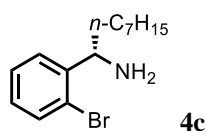

**(S)-1-(2-bromophenyl)octan-1-amine 4c:** Colorless oil, actual mass 0.23g, 83% yield, (eluent: petroleum ether/ethyl acetate = 3:1).  $[\alpha]_{\text{D}}^{25} = -25.7$  ( $c = 0.2$ ,  $\text{CHCl}_3$ ).

$^1\text{H}$  NMR (600 MHz,  $\text{CDCl}_3$ )  $\delta$  7.52 (dd,  $J = 8.0, 1.3$  Hz, 1H), 7.46 (dd,  $J = 7.8, 1.8$  Hz, 1H), 7.30 (td,  $J = 7.6, 1.3$  Hz, 1H), 7.08 (td,  $J = 7.6, 1.7$  Hz, 1H), 4.35 – 4.31 (m, 1H), 1.77 – 1.68 (m, 1H), 1.44 – 1.39 (m, 1H), 1.30 – 1.25 (m, 10H), 0.87 (t,  $J = 7.0$ , 3H).

$^{13}\text{C}$  NMR (101 MHz,  $\text{CDCl}_3$ )  $\delta$  145.5, 132.8, 128.1, 127.7, 127.2, 123.5, 54.4, 38.1, 31.8, 29.5, 29.2, 26.5, 22.6, 14.1.

**HRMS** (ESI)  $m/z$ :  $[\text{M} + \text{H}]^+$  calcd for  $\text{C}_{14}\text{H}_{23}\text{BrN}$  284.1008; found 284.1005.

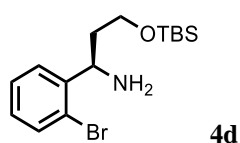

**(R)-1-(2-bromophenyl)-3-((tert-butyldimethylsilyloxy)propan-1-amine 4d:** Colorless oil, actual mass 0.69g, 50% yield, (eluent: petroleum ether/ethyl acetate = 3:1).  $[\alpha]_{\text{D}}^{25} = +25.1$  ( $c = 0.2$ ,  $\text{CHCl}_3$ ).

$^1\text{H}$  NMR (600 MHz,  $\text{CDCl}_3$ )  $\delta$  7.53 – 7.50 (m, 2H), 7.32 – 7.30 (m, 1H), 7.10 – 7.07 (m, 1H), 4.52 – 4.50 (m, 1H), 3.77 – 3.74 (m, 2H), 1.99 – 1.93 (m, 1H), 1.82 – 1.77 (m, 1H), 0.90 (s, 9H), 0.05 (s, 6H).

$^{13}\text{C}$  NMR (151 MHz,  $\text{CDCl}_3$ )  $\delta$  145.1, 132.9, 128.2, 127.7, 127.4, 123.2, 61.1, 52.5, 40.0, 25.9, 18.2, -5.4, -5.4.

**HRMS** (ESI)  $m/z$ :  $[\text{M} + \text{H}]^+$  calcd for  $\text{C}_{15}\text{H}_{27}\text{BrNOSi}$  344.1040; found 344.1009.

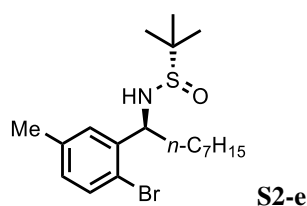

**(S)-N-((S)-1-(2-bromo-5-methylphenyl)octyl)-2-methylpropane-2-sulfinamide S2-e:** The crude product was formed as 20:1 mixture of diastereomers as judged by  $^1\text{H}$  NMR analysis. Purification by silica gel column chromatography with petroleum ether/ethyl acetate 10/1  $\rightarrow$  5/1 to afford the title compound (0.84 g, 56% yield) as a colorless oil with  $>20:1$  dr.  $[\alpha]_{\text{D}}^{25} = +14.9$  ( $c = 0.2$ ,  $\text{CHCl}_3$ ).

$^1\text{H}$  NMR (600 MHz,  $\text{CDCl}_3$ )  $\delta$  7.39 (d,  $J = 8.1$  Hz, 1H), 7.14 (d,  $J = 2.3$  Hz, 1H), 6.92 (dd,  $J = 8.1, 2.1$  Hz, 1H), 4.73 – 4.70 (m, 1H), 3.60 (br, 1H), 2.30 (s, 3H), 1.90 – 1.84 (m, 1H), 1.81 – 1.75 (m, 1H), 1.37 – 1.21 (m, 10H), 1.20 (s, 9H), 0.85 (t,  $J = 7.1$  Hz, 3H).

$^{13}\text{C}$  NMR (151 MHz,  $\text{CDCl}_3$ )  $\delta$  141.3, 137.5, 132.8, 129.8, 129.0, 120.0, 58.5, 56.0, 36.4, 31.7, 29.2, 29.0, 25.6, 22.5, 22.5, 21.0, 14.0.

**HRMS** (ESI)  $m/z$ :  $[\text{M} + \text{H}]^+$  calcd for  $\text{C}_{19}\text{H}_{33}\text{BrNOS}$  402.1461; found 402.1463.

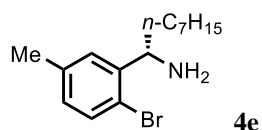

**(S)-1-(2-bromo-5-methylphenyl)octan-1-amine 4e:** Colorless oil, actual mass 0.24 g, 80% yield, (eluent: petroleum ether/ethyl acetate = 3:1).  $[\alpha]_{\text{D}}^{25} = -24.5$  ( $c = 0.2$ ,  $\text{CHCl}_3$ ).

$^1\text{H}$  NMR (600 MHz,  $\text{CDCl}_3$ )  $\delta$  7.39 (d,  $J = 8.1$  Hz, 1H), 7.26 (d,  $J = 2.3$  Hz, 1H), 6.90 (dd,  $J = 8.1, 2.2$  Hz, 1H), 4.31 – 4.28 (m, 1H), 2.31 (s, 3H), 1.74 – 1.68 (m, 1H), 1.44 – 1.40 (m, 1H), 1.30 – 1.25 (m, 10H), 0.87 (t,  $J = 6.9$  Hz, 3H).

$^{13}\text{C}$  NMR (151 MHz,  $\text{CDCl}_3$ )  $\delta$  144.9, 137.5, 132.5, 129.0, 127.9, 120.1, 54.3, 38.1, 31.8, 29.5, 29.2, 26.5, 22.6, 21.0, 14.1.

**HRMS** (ESI)  $m/z$ :  $[\text{M} + \text{H}]^+$  calcd for  $\text{C}_{15}\text{H}_{25}\text{BrN}$  298.1165; found 298.1150.

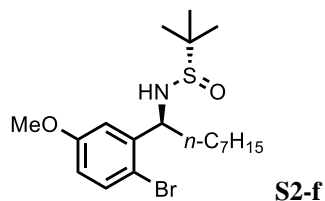

**(S)-N-((S)-1-(2-bromo-5-methoxyphenyl)octyl)-2-methylpropane-2-sulfinamide S2-f.** The crude product was formed as 11:1 mixture of diastereomers as judged by  $^1\text{H}$  NMR analysis. Purification by silica gel column chromatography with petroleum ether/ethyl acetate 8/1  $\rightarrow$  3/1 to afford the title compound (0.84 g, 55%) as a colorless oil with  $>20:1$  dr.  $[\alpha]_{\text{D}}^{25} = +23.3$  ( $c = 0.2$ ,  $\text{CHCl}_3$ ).

$^1\text{H}$  NMR (600 MHz,  $\text{CDCl}_3$ )  $\delta$  7.41 (d,  $J = 8.8$  Hz, 1H), 6.92 (d,  $J = 3.0$  Hz, 1H), 6.68 (dd,  $J = 8.8, 3.1$  Hz, 1H), 4.73 – 4.68 (m, 1H), 3.78 (s, 3H), 3.59 (d,  $J = 5.8$  Hz, 1H), 1.88 – 1.76 (m, 2H), 1.36 – 1.22 (m, 10H), 1.20 (s, 9H), 0.85 (t,  $J = 6.8$  Hz, 3H).

$^{13}\text{C}$  NMR (151 MHz,  $\text{CDCl}_3$ )  $\delta$  159.0, 142.8, 133.6, 114.5, 114.2, 113.7, 58.3, 56.0, 55.4, 36.2, 31.7, 29.3, 29.1, 25.5, 22.6, 22.5, 14.0.

**HRMS** (ESI)  $m/z$ :  $[\text{M} + \text{H}]^+$  calcd for  $\text{C}_{19}\text{H}_{33}\text{BrNO}_2\text{S}$  418.1410; found 418.1409.

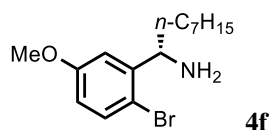

**(S)-1-(2-bromo-5-methoxyphenyl)octan-1-amine 4f:** Colorless oil, actual mass 0.27g, 85% yield, (eluent: petroleum ether/ethyl acetate = 1:1).  $[\alpha]_{\text{D}}^{25} = -12.8$  ( $c = 0.2$ ,  $\text{CHCl}_3$ ).

$^1\text{H}$  NMR (600 MHz,  $\text{CDCl}_3$ )  $\delta$  7.40 (d,  $J = 8.7$  Hz, 1H), 7.03 (d,  $J = 3.1$  Hz, 1H), 6.66 (dd,  $J = 8.7, 3.1$  Hz, 1H), 4.29 – 4.27 (m, 1H), 3.80 (s, 3H), 1.74 – 1.68 (m, 1H), 1.42 – 1.38 (m, 1H), 1.31 – 1.23 (m, 10H), 0.87 (t,  $J = 6.9$  Hz, 3H).



$^{13}\text{C}$  NMR (151 MHz,  $\text{CDCl}_3$ )  $\delta$  159.3, 146.4, 133.3, 113.9, 113.8, 112.8, 55.5, 54.5, 38.0, 31.8, 29.5, 29.2, 26.4, 22.6, 14.1.

HRMS (ESI)  $m/z$ :  $[\text{M} + \text{H}]^+$  calcd for  $\text{C}_{15}\text{H}_{25}\text{BrNO}$  314.1114; found 314.1108.

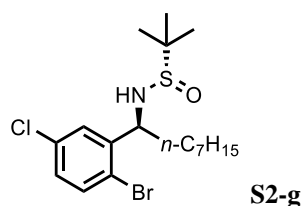

**(S)-N-((S)-1-(2-bromo-5-chlorophenyl)octyl)-2-methylpropane-2-sulfonamide S2-g.** The crude product was formed as 11:1 mixture of diastereomers as judged by  $^1\text{H}$  NMR analysis. Purification by silica gel column chromatography with petroleum ether/ethyl acetate 10/1  $\rightarrow$  5/1 to afford the title compound (0.69 g, 45% yield) as a white solid with  $>20:1$  dr.  $[\alpha]_{\text{D}}^{25} = +95.8$  ( $c = 0.2$ ,  $\text{CHCl}_3$ ).

$^1\text{H}$  NMR (600 MHz,  $\text{CDCl}_3$ )  $\delta$  7.46 (d,  $J = 8.5$  Hz, 1H), 7.33 (d,  $J = 2.6$  Hz, 1H), 7.10 (dd,  $J = 8.5, 2.6$  Hz, 1H), 4.74 – 4.71 (m, 1H), 3.61 (br, 1H), 1.90 – 1.84 (m, 1H), 1.80 – 1.74 (m, 1H), 1.35 – 1.22 (m, 10H), 1.21 (s, 9H), 0.85 (t,  $J = 7.0$  Hz, 3H).

$^{13}\text{C}$  NMR (151 MHz,  $\text{CDCl}_3$ )  $\delta$  143.7, 134.2, 133.8, 129.0, 128.5, 121.2, 58.1, 56.1, 36.2, 31.7, 29.2, 29.0, 25.5, 22.5, 14.0.

HRMS (ESI)  $m/z$ :  $[\text{M} + \text{H}]^+$  calcd for  $\text{C}_{18}\text{H}_{30}\text{BrClNOS}$  422.0915; found 422.0918.

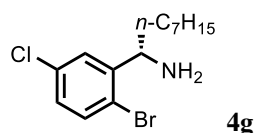

**(S)-1-(2-bromo-5-chlorophenyl)octan-1-amine 4g:** Colorless oil, actual mass 0.26 g, 82% yield, (eluent: petroleum ether/ethyl acetate = 3:1).  $[\alpha]_{\text{D}}^{25} = -15.6$  ( $c = 0.2$ ,  $\text{CHCl}_3$ ).

$^1\text{H}$  NMR (600 MHz,  $\text{CDCl}_3$ )  $\delta$  7.47 (d,  $J = 2.6$  Hz, 1H), 7.43 (d,  $J = 8.4$  Hz, 1H), 7.06 (dd,  $J = 8.5, 2.6$  Hz, 1H), 4.29 – 4.27 (m, 1H), 1.71 – 1.65 (m, 1H), 1.41 – 1.37 (m, 1H), 1.32 – 1.25 (m, 10H), 0.87 (t,  $J = 6.9$  Hz, 3H).

$^{13}\text{C}$  NMR (151 MHz,  $\text{CDCl}_3$ )  $\delta$  147.4, 133.8, 133.8, 128.2, 127.6, 121.0, 54.3, 38.0, 31.8, 29.4, 29.2, 26.4, 22.6, 14.1.

HRMS (ESI)  $m/z$ :  $[\text{M} + \text{H}]^+$  calcd for  $\text{C}_{14}\text{H}_{22}\text{BrClN}$  318.0619; found 318.0610.

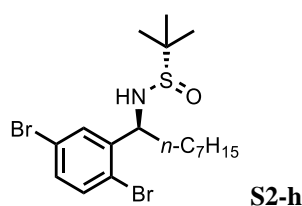

**(S)-N-((S)-1-(2,5-dibromophenyl)octyl)-2-methylpropane-2-sulfonamide S2-h.** The crude product was formed as 10:1 mixture of diastereomers as judged by  $^1\text{H}$  NMR analysis. Purification by silica gel column chromatography with petroleum ether/ethyl acetate 10/1  $\rightarrow$  5/1 to afford the title compound (0.73 g, 43% yield) as a white solid with  $>20:1$  dr.  $[\alpha]_{\text{D}}^{25} = +155.5$  ( $c = 0.2$ ,  $\text{CHCl}_3$ ).

$^1\text{H}$  NMR (600 MHz,  $\text{CDCl}_3$ )  $\delta$  7.47 (d,  $J = 2.4$  Hz, 1H), 7.40 (d,  $J = 8.5$  Hz, 1H), 7.26 – 7.24 (m, 1H), 4.74 – 4.71 (m, 1H), 3.59 (br, 1H), 1.90 – 1.85 (m, 1H), 1.80 – 1.75 (m, 1H), 1.35 – 1.22 (m, 10H), 1.21 (s, 9H), 0.86 (t,  $J = 7.1$  Hz, 3H).

$^{13}\text{C}$  NMR (151 MHz,  $\text{CDCl}_3$ )  $\delta$  144.0, 134.5, 132.0, 131.4, 122.0, 121.7, 58.2, 56.2, 36.2, 31.7, 29.2, 29.1, 25.5, 22.6, 22.6, 14.1.

HRMS (ESI)  $m/z$ :  $[\text{M} + \text{H}]^+$  calcd for  $\text{C}_{18}\text{H}_{30}\text{Br}_2\text{NOS}$  466.0409; found 466.0403.

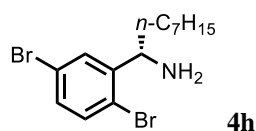

**(S)-1-(2,5-dibromophenyl)octan-1-amine 4h:** Colorless oil, actual mass 0.31g, 80% yield, (eluent: petroleum ether/ethyl acetate = 3:1).  $[\alpha]_D^{25} = -11.9$  (c = 0.2, CHCl<sub>3</sub>).

**<sup>1</sup>H NMR** (600 MHz, CDCl<sub>3</sub>)  $\delta$  7.67 (d, *J* = 2.4 Hz, 1H), 7.38 (d, *J* = 8.4 Hz, 1H), 7.22 (dd, *J* = 8.5, 2.4 Hz, 1H), 4.36 – 4.33 (m, 1H), 1.75 – 1.70 (m, 1H), 1.65 – 1.60 (m, 1H), 1.31 – 1.21 (m, 10H), 0.87 (t, *J* = 6.9 Hz, 3H).

**<sup>13</sup>C NMR** (151 MHz, CDCl<sub>3</sub>)  $\delta$  146.2, 134.2, 131.5, 130.6, 122.0, 121.9, 54.3, 37.4, 31.8, 29.3, 29.1, 26.2, 22.6, 14.1.

**HRMS** (ESI) *m/z*: [M + H]<sup>+</sup> calcd for C<sub>14</sub>H<sub>22</sub>Br<sub>2</sub>N 362.0114; found 362.0111.

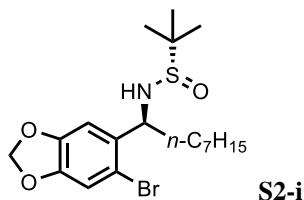

**(S)-N-((S)-1-(6-bromobenzo[d][1,3]dioxol-5-yl)octyl)-2-methylpropane-2-sulfonamide S2-i:** The crude product was formed as 14:1 mixture of diastereomers as judged by <sup>1</sup>H NMR analysis. Purification by silica gel column chromatography with petroleum ether/ethyl acetate 8/1 → 3/1 to afford the title compound (0.80 g, 50% yield) as a colorless oil with >20:1 dr.  $[\alpha]_D^{25} = +41.4$  (c = 0.2, CHCl<sub>3</sub>).

**<sup>1</sup>H NMR** (600 MHz, CDCl<sub>3</sub>)  $\delta$  6.95 (s, 1H), 6.82 (s, 1H), 5.94 (d, *J* = 4.4 Hz, 2H), 4.73 – 4.69 (m, 1H), 3.48 (br, 1H), 1.88 – 1.84 (m, 1H), 1.71 – 1.65 (m, 1H), 1.29 – 1.20 (m, 10H), 1.18 (s, 9H), 0.83 (t, *J* = 7.1 Hz, 3H).

**<sup>13</sup>C NMR** (151 MHz, CDCl<sub>3</sub>)  $\delta$  147.6, 147.5, 134.9, 113.8, 112.6, 107.7, 101.7, 57.9, 55.9, 36.3, 31.7, 29.3, 29.0, 25.4, 22.5, 22.5, 14.0.

**HRMS** (ESI) *m/z*: [M + H]<sup>+</sup> calcd for C<sub>19</sub>H<sub>31</sub>BrNO<sub>3</sub>S 432.1203; found 432.1199.

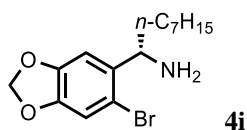

**(S)-1-(6-bromobenzo[d][1,3]dioxol-5-yl)octan-1-amine 4i:** Colorless oil, actual mass 0.27 g, 83% yield, (eluent: petroleum ether/ethyl acetate = 1:1).  $[\alpha]_D^{25} = -11.0$  (c = 0.2, CHCl<sub>3</sub>).

**<sup>1</sup>H NMR** (600 MHz, CDCl<sub>3</sub>)  $\delta$  6.97 (d, *J* = 3.3 Hz, 2H), 5.95 (s, 2H), 4.27 (t, *J* = 6.8 Hz, 1H), 1.66 – 1.60 (m, 1H), 1.39 – 1.35 (m, 1H), 1.30 – 1.24 (m, 10H), 0.86 (t, *J* = 6.8 Hz, 3H).

**<sup>13</sup>C NMR** (151 MHz, CDCl<sub>3</sub>)  $\delta$  147.7, 146.9, 138.8, 113.4, 112.5, 107.0, 101.6, 54.2, 38.2, 31.8, 29.5, 29.2, 26.4, 22.6, 14.1.

**HRMS** (ESI) *m/z*: [M + H]<sup>+</sup> calcd for C<sub>15</sub>H<sub>23</sub>BrNO<sub>2</sub> 328.0907; found 328.0893.

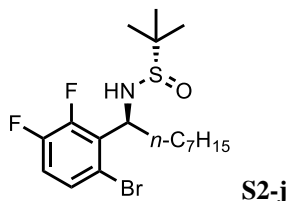

**(S)-N-((S)-1-(6-bromo-2,3-difluorophenyl)octyl)-2-methylpropane-2-sulfonamide S2-j:** The crude product was formed as 7:1 mixture of diastereomers as judged by <sup>1</sup>H NMR analysis. Purification by silica gel column chromatography with petroleum ether/ethyl acetate 10/1 → 5/1 to afford the title compound (0.56 g, 38% yield) as a colorless oil with >20:1 dr.  $[\alpha]_D^{25} = +58.2$  (c = 0.2, CHCl<sub>3</sub>).

**<sup>1</sup>H NMR** (600 MHz, CDCl<sub>3</sub>)  $\delta$  7.30 – 7.29 (m, 1H), 6.99 – 6.94 (m, 1H), 4.83 – 4.79 (m, 1H), 3.94 (br, 1H), 1.92 – 1.80 (m, 2H), 1.46 – 1.24 (m, 10H), 1.22 (s, 9H), 0.87 (t, *J* = 7.0 Hz, 3H).

$^{13}\text{C}$  NMR (151 MHz,  $\text{CDCl}_3$ )  $\delta$  150.2 (d,  $J = 250.0$ , 13.4 Hz), 150.1 (d,  $J = 250.4$ , 13.8 Hz), 132.9 – 132.8 (m), 128.5 – 128.4 (m), 117.2, 117.1, 60.0, 56.3, 35.7, 31.8, 29.1, 29.0, 26.2, 22.6, 22.6, 14.1.

HRMS (ESI)  $m/z$ :  $[\text{M} + \text{H}]^+$  calcd for  $\text{C}_{18}\text{H}_{29}\text{BrF}_2\text{NOS}$  424.1116; found 424.1115.

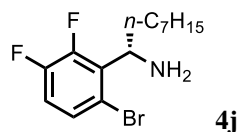

**(S)-1-(1-bromonaphthalen-2-yl)octan-1-amine 4j**: Colorless oil, actual mass 0.25 g, 78% yield, (eluent: petroleum ether/ethyl acetate = 3:1).  $[\alpha]_{\text{D}}^{25} = -10.1$  ( $c = 0.2$ ,  $\text{CHCl}_3$ ).

$^1\text{H}$  NMR (600 MHz,  $\text{CDCl}_3$ )  $\delta$  7.30 – 7.27 (m, 1H), 6.96 – 6.92 (m, 1H), 4.37 (t,  $J = 7.5$  Hz, 1H), 1.86 – 1.82 (m, 1H), 1.46 – 1.40 (m, 1H), 1.31 – 1.18 (m, 10H), 0.87 (t,  $J = 6.9$  Hz, 3H).

$^{13}\text{C}$  NMR (151 MHz,  $\text{CDCl}_3$ )  $\delta$  150.4 (dd,  $J = 249.5$ , 13.7 Hz), 149.3 (dd,  $J = 249.3$ , 12.8 Hz), 135.4 (d,  $J = 10.8$  Hz), 128.4 – 128.3 (m), 117.1 (m), 116.2 (d,  $J = 18.0$  Hz), 55.0, 36.6, 31.8, 29.4, 29.1, 26.7, 22.6, 14.1.

HRMS (ESI)  $m/z$ :  $[\text{M} + \text{H}]^+$  calcd for  $\text{C}_{14}\text{H}_{21}\text{BrF}_2\text{N}$  320.0820; found 320.0808.

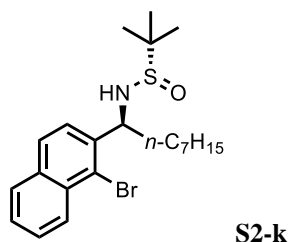

**(S)-N-((S)-1-(1-bromonaphthalen-2-yl)octyl)-2-methylpropane-2-sulfonamide S2-k**: The crude product was formed as 8:1 mixture of diastereomers as judged by  $^1\text{H}$  NMR analysis. Purification by silica gel column chromatography with petroleum ether/ethyl acetate 10/1  $\rightarrow$  5/1 to afford the title compound (0.79 g, 51%) as a colorless oil with >20:1 dr.  $[\alpha]_{\text{D}}^{25} = +119.7$  ( $c = 0.2$ ,  $\text{CHCl}_3$ ).

$^1\text{H}$  NMR (600 MHz,  $\text{CDCl}_3$ )  $\delta$  8.35 (d,  $J = 8.6$  Hz, 1H), 7.80 (t,  $J = 7.6$  Hz, 2H), 7.61 – 7.57 (m, 1H), 7.53 – 7.47 (m, 2H), 5.23 – 5.18 (m, 1H), 3.67 (d,  $J = 5.3$  Hz, 1H), 2.05 – 1.97 (m, 1H), 1.89 – 1.81 (m, 1H), 1.41 – 1.22 (m, 19H), 0.84 (t,  $J = 6.8$  Hz, 3H).

$^{13}\text{C}$  NMR (151 MHz,  $\text{CDCl}_3$ )  $\delta$  139.6, 133.9, 132.2, 128.1, 128.0, 127.8, 127.5, 126.6, 124.8, 123.5, 58.7, 56.0, 36.4, 31.7, 29.3, 29.0, 25.6, 22.5, 14.0.

HRMS (ESI)  $m/z$ :  $[\text{M} + \text{H}]^+$  calcd for  $\text{C}_{22}\text{H}_{33}\text{BrNOS}$  438.1461; found 438.1457.

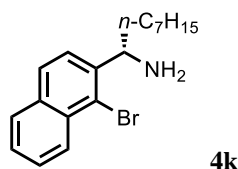

**(S)-(2-bromophenyl)(cyclopropyl)methanamine 4k**: Colorless oil, actual mass 0.28 g, 83% yield, (eluent: petroleum ether/ethyl acetate = 3:1).  $[\alpha]_{\text{D}}^{25} = -20.0$  ( $c = 0.2$ ,  $\text{CHCl}_3$ ).

$^1\text{H}$  NMR (600 MHz,  $\text{CDCl}_3$ )  $\delta$  8.35 (d,  $J = 8.5$  Hz, 1H), 7.81 (t,  $J = 7.6$  Hz, 2H), 7.60 – 7.57 (m, 2H), 7.50 (t,  $J = 7.4$  Hz, 1H), 4.73 (t,  $J = 6.9$  Hz, 1H), 1.81 – 1.75 (m, 1H), 1.46 – 1.40 (m, 1H), 1.33 – 1.22 (m, 10H), 0.86 (t,  $J = 7.0$  Hz, 3H).

$^{13}\text{C}$  NMR (151 MHz,  $\text{CDCl}_3$ )  $\delta$  143.2, 133.8, 132.3, 128.1, 128.0, 127.7, 127.3, 126.2, 124.4, 122.9, 55.2, 38.1, 31.8, 29.5, 29.2, 26.4, 22.6, 14.1.

HRMS (ESI)  $m/z$ :  $[\text{M} + \text{H}]^+$  calcd for  $\text{C}_{18}\text{H}_{25}\text{BrN}$  334.1165; found 334.1160.

## 8. Characterization of the Products.

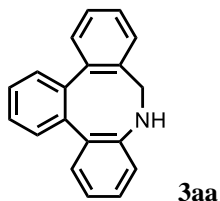

**9,10-dihydrotribenzo[b,d,f]azocine 3aa:** Colorless oil, actual mass 46.8 mg, 91% yield, (eluent: petroleum ether/ethyl acetate = 20:1).

$^1\text{H NMR}$  (600 MHz,  $\text{CDCl}_3$ )  $\delta$  7.47 – 7.37 (m, 2H), 7.31 – 7.20 (m, 6H), 6.99 – 6.94 (m, 1H), 6.78 (dd,  $J = 7.7, 1.7$  Hz, 1H), 6.66 (td,  $J = 7.4, 1.2$  Hz, 1H), 6.48 (dd,  $J = 8.0, 1.2$  Hz, 1H), 4.30 (d,  $J = 14.4$  Hz, 1H), 4.17 (br, 1H), 3.89 (d,  $J = 14.3$  Hz, 1H).

$^{13}\text{C NMR}$  (151 MHz,  $\text{CDCl}_3$ )  $\delta$  145.5, 143.4, 142.6, 141.2, 136.7, 133.8, 131.4, 129.0, 128.7, 128.2, 128.1, 128.0, 127.8, 127.8, 127.2, 118.6, 118.2, 49.2.

**HRMS** (ESI)  $m/z$ :  $[\text{M} + \text{H}]^+$  calcd for  $\text{C}_{19}\text{H}_{16}\text{N}$  258.1277; found 258.1265.

**HPLC** (Daicel CHIRALPAK AD-H, *n*-hexane : isopropanol = 98.5 : 1.5, Flow rate = 1.0 mL/min,  $\lambda = 220$  nm:  $t_{\text{R}1} = 11.27$  min,  $t_{\text{R}2} = 12.52$  min.

<chromatogram>

mV

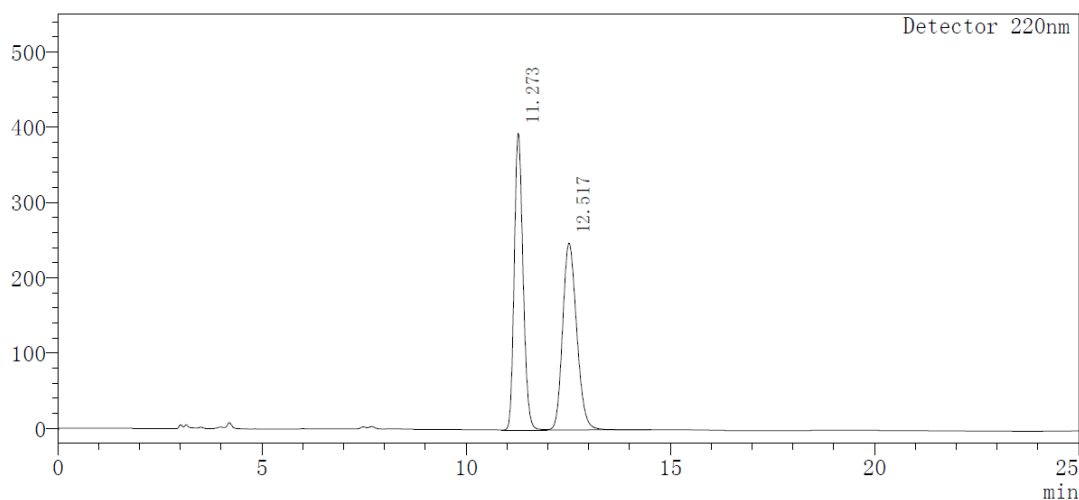

<Peak table>

| Peak# | Ret. Time | Height | Area     | Area%   |
|-------|-----------|--------|----------|---------|
| 1     | 11.273    | 393986 | 5919070  | 49.852  |
| 2     | 12.517    | 247964 | 5954331  | 50.148  |
| Total |           | 641950 | 11873400 | 100.000 |

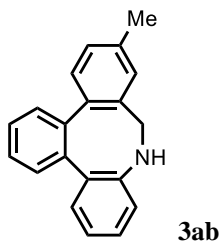

**12-methyl-9,10-dihydrotribenzo[b,d,f]azocine 3ab:** Colorless oil, actual mass 51.5 mg, 95% yield, (eluent: petroleum ether/ethyl acetate = 20:1).

**<sup>1</sup>H NMR** (600 MHz, CDCl<sub>3</sub>) δ 7.47 – 7.40 (m, 2H), 7.32 (dd, *J* = 7.5, 1.5 Hz, 1H), 7.23 (d, *J* = 7.6 Hz, 2H), 7.12 (d, *J* = 7.6 Hz, 1H), 7.09 (s, 1H), 7.00 (td, *J* = 8.4, 1.6 Hz, 1H), 6.81 (dd, *J* = 7.7, 1.6 Hz, 1H), 6.69 (td, *J* = 7.4, 1.2 Hz, 1H), 6.52 (dd, *J* = 8.1, 1.2 Hz, 1H), 4.31 (d, *J* = 14.4 Hz, 1H), 4.18 (br, 1H), 3.86 (d, *J* = 14.4 Hz, 1H), 2.36 (s, 3H).

**<sup>13</sup>C NMR** (151 MHz, CDCl<sub>3</sub>) δ 145.6, 142.6, 141.2, 140.6, 137.8, 136.5, 133.9, 131.4, 129.1, 128.9, 128.8, 128.6, 128.0, 127.7, 127.1, 118.6, 118.2, 49.3, 21.2.

**HRMS** (ESI) *m/z*: [M + H]<sup>+</sup> calcd for C<sub>20</sub>H<sub>18</sub>N 272.1434; found 272.1415.

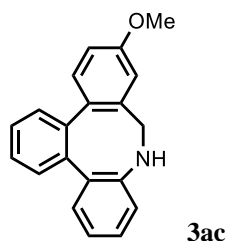

**12-methoxy-9,10-dihydrotribenzo[b,d,f]azocine 3ac:** Colorless oil, actual mass 50.5 mg, 88% yield, (eluent: petroleum ether/ethyl acetate = 10:1).

**<sup>1</sup>H NMR** (600 MHz, CDCl<sub>3</sub>) δ 7.45 (td, *J* = 7.5, 1.5 Hz, 1H), 7.40 (td, *J* = 7.5, 1.5 Hz, 1H), 7.32 (dd, *J* = 7.5, 1.5 Hz, 1H), 7.26 (d, *J* = 8.3 Hz, 1H), 7.22 (dd, *J* = 7.5, 1.5 Hz, 1H), 7.02 – 6.99 (m, 1H), 6.85 (dd, *J* = 8.3, 2.6 Hz, 1H), 6.81 (dd, *J* = 8.3, 2.2 Hz, 2H), 6.69 (td, *J* = 7.4, 1.2 Hz, 1H), 6.52 (dd, *J* = 8.1, 1.2 Hz, 1H), 4.31 (d, *J* = 14.4 Hz, 1H), 4.20 (br, 1H), 3.86 (d, *J* = 14.5 Hz, 1H), 3.81 (s, 3H).

**<sup>13</sup>C NMR** (151 MHz, CDCl<sub>3</sub>) δ 159.4, 145.5, 142.6, 140.9, 138.0, 136.0, 133.8, 131.4, 129.1, 128.9, 128.9, 128.0, 127.9, 127.1, 118.7, 118.2, 113.6, 113.0, 55.2, 49.5.

**HRMS** (ESI) *m/z*: [M + H]<sup>+</sup> calcd for C<sub>20</sub>H<sub>18</sub>NO 288.1383; found 288.1363.

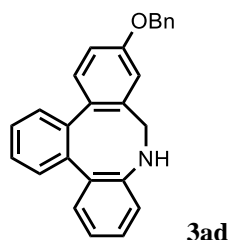

**12-(benzyloxy)-9,10-dihydrotribenzo[b,d,f]azocine 3ad:** White solid, actual mass 67.5 mg, 93% yield, (eluent: petroleum ether/ethyl acetate = 10:1).

**<sup>1</sup>H NMR** (600 MHz, CDCl<sub>3</sub>) δ 7.41 – 7.35 (m, 6H), 7.33 – 7.28 (m, 2H), 7.23 – 7.17 (m, 2H), 6.97 (t, *J* = 7.6 Hz, 1H), 6.88 – 6.85 (m, 2H), 6.78 (d, *J* = 7.6 Hz, 1H), 6.66 (t, *J* = 7.4 Hz, 1H), 6.47 (d, *J* = 8.0 Hz, 1H), 5.00 (s, 2H), 4.26 (d, *J* = 14.4 Hz, 1H), 4.22 (br, 1H), 3.79 (d, *J* = 14.4 Hz, 1H).

**<sup>13</sup>C NMR** (151 MHz, CDCl<sub>3</sub>) δ 158.6, 145.4, 142.6, 140.9, 138.0, 136.8, 136.2, 133.8, 131.4, 129.1, 128.9, 128.8, 128.5, 128.0, 128.0, 127.9, 127.5, 127.1, 118.7, 118.2, 114.5, 113.9, 67.0, 49.4.

**HRMS** (ESI) *m/z*: [M + H]<sup>+</sup> calcd for C<sub>26</sub>H<sub>22</sub>NO 364.1696; found 364.1702.

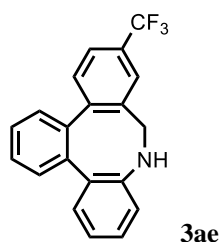

**12-(trifluoromethyl)-9,10-dihydrotribenzo[b,d,f]azocine 3ae:** Colorless oil, actual mass 48.7 mg, 70% yield, (eluent: petroleum ether/ethyl acetate = 20:1).

**<sup>1</sup>H NMR** (600 MHz, CDCl<sub>3</sub>) δ 7.57 – 7.49 (m, 3H), 7.45 – 7.42 (m, 2H), 7.34 (dd, *J* = 7.6, 1.4 Hz, 1H), 7.20 (dd, *J* = 7.5, 1.4 Hz, 1H), 7.03 – 7.00 (m, 1H), 6.80 (dd, *J* = 7.7, 1.6 Hz, 1H), 6.71 (td, *J* = 7.4, 1.2 Hz, 1H), 6.52 (dd, *J* = 8.1, 1.2 Hz, 1H), 4.36 (d, *J* = 14.5 Hz, 1H), 4.21 (br, 1H), 3.96 (d, *J* = 14.4 Hz, 1H).

**<sup>13</sup>C NMR** (151 MHz, CDCl<sub>3</sub>) δ 147.1, 147.1, 144.9, 142.4, 139.9, 137.5, 133.9, 131.7, 130.3 (q, *J* = 32.4 Hz), 128.9, 128.3, 128.1, 127.4, 125.2 (q, *J* = 3.7 Hz), 124.7 (d, *J* = 3.7 Hz), 124.1 (d, *J* = 272.2 Hz), 119.0, 118.3, 48.9.

**HRMS** (ESI) *m/z*: [M + H]<sup>+</sup> calcd for C<sub>20</sub>H<sub>15</sub>F<sub>3</sub>N 326.1151; found 326.1148.

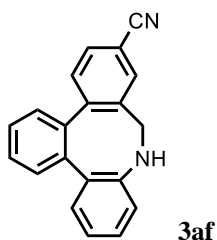

**9,10-dihydrotribenzo[b,d,f]azocine-12-carbonitrile 3af:** Colorless oil, actual mass 16.9 mg, 30% yield, (eluent: petroleum ether/ethyl acetate = 10:1).

**<sup>1</sup>H NMR** (600 MHz, CDCl<sub>3</sub>) δ 7.57 – 7.56 (m, 2H), 7.51 (t, *J* = 7.1 Hz, 1H), 7.45 – 7.40 (m, 2H), 7.33 (d, *J* = 7.6 Hz, 1H), 7.17 (d, *J* = 7.2 Hz, 1H), 7.01 (td, *J* = 7.7, 1.7 Hz, 1H), 6.77 (d, *J* = 7.8 Hz, 1H), 6.70 (t, *J* = 7.4 Hz, 1H), 6.51 (d, *J* = 8.1 Hz, 1H), 4.31 (d, *J* = 14.6 Hz, 1H), 4.20 (br, 1H), 3.94 (d, *J* = 14.6 Hz, 1H).

**<sup>13</sup>C NMR** (151 MHz, CDCl<sub>3</sub>) δ 148.3, 144.7, 142.3, 139.4, 138.2, 133.9, 132.1, 131.8, 131.5, 129.2, 128.7, 128.5, 128.0, 127.5, 119.1, 118.7, 118.4, 111.9, 48.6.

**HRMS** (ESI) *m/z*: [M + H]<sup>+</sup> calcd for C<sub>20</sub>H<sub>15</sub>N<sub>2</sub> 283.1230; found 283.1227.

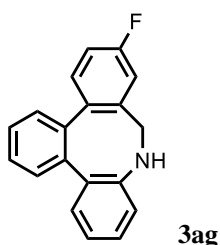

**12-fluoro-9,10-dihydrotribenzo[b,d,f]azocine 3ag:** Colorless oil, actual mass 41.3 mg, 75% yield, (eluent: petroleum ether/ethyl acetate = 20:1).

**<sup>1</sup>H NMR** (600 MHz, CDCl<sub>3</sub>) δ 7.47 (td, *J* = 7.5, 1.5 Hz, 1H), 7.41 (td, *J* = 7.5, 1.4 Hz, 1H), 7.33 – 7.28 (m, 2H), 7.20 (dd, *J* = 7.5, 1.4 Hz, 1H), 7.03 – 6.97 (m, 3H), 6.80 (dd, *J* = 7.7, 1.6 Hz, 1H), 6.70 (td, *J* = 7.4, 1.2 Hz, 1H), 6.52 (dd, *J* = 8.1, 1.2 Hz, 1H), 4.30 (dd, *J* = 14.5, 1.4 Hz, 1H), 4.17 (br, 1H), 3.87 (d, *J* = 14.4 Hz, 1H).

**<sup>13</sup>C NMR** (151 MHz, CDCl<sub>3</sub>) δ 162.4 (d, *J* = 246.6 Hz), 145.14, 142.58, 140.23, 139.4 (d, *J* = 3.1 Hz), 138.8 (d, *J* = 6.6 Hz), 133.81, 131.47, 129.4 (d, *J* = 8.2 Hz), 129.06, 128.59, 128.35, 128.17, 127.28, 118.87, 118.22, 114.8 (d, *J* = 21.4 Hz), 114.7 (d, *J* = 21.0 Hz), 49.11.

**HRMS** (ESI) *m/z*: [M + H]<sup>+</sup> calcd for C<sub>19</sub>H<sub>15</sub>FN 276.1183; found 276.1176.

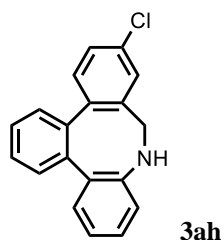

**12-chloro-9,10-dihydrotribenzo[b,d,f]azocine 3ah:** Colorless oil, actual mass 46.6 mg, 80% yield, (eluent: petroleum ether/ethyl acetate = 20:1).

**<sup>1</sup>H NMR** (600 MHz, CDCl<sub>3</sub>) δ 7.51 (td, *J* = 7.5, 1.5 Hz, 1H), 7.45 (td, *J* = 7.5, 1.4 Hz, 1H), 7.36 (dd, *J* = 7.6, 1.4 Hz, 1H), 7.30 (s, 3H), 7.22 (dd, *J* = 7.5, 1.4 Hz, 1H), 7.07 – 7.04 (m, 1H), 6.83 (dd, *J* = 7.7, 1.6 Hz, 1H), 6.74 (td, *J* = 7.4, 1.2 Hz, 1H), 6.56 (dd, *J* = 8.1, 1.2 Hz, 1H), 4.32 (d, *J* = 14.5 Hz, 1H), 4.21 (br, 1H), 3.90 (d, *J* = 14.4 Hz, 1H).

**<sup>13</sup>C NMR** (151 MHz, CDCl<sub>3</sub>) δ 145.1, 142.5, 141.9, 140.1, 138.5, 133.9, 133.5, 131.6, 129.2, 128.9, 128.5, 128.4, 128.2, 128.2, 128.0, 127.3, 118.9, 118.3, 48.9.

**HRMS** (ESI) *m/z*: [M + H]<sup>+</sup> calcd for C<sub>19</sub>H<sub>15</sub>ClN 292.0888; found 292.0886.

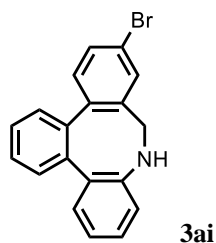

**12-bromo-9,10-dihydrotribenzo[b,d,f]azocine 3ai:** Colorless oil, actual mass 30.1 mg, 45% yield, (eluent: petroleum ether/ethyl acetate = 20:1).

**<sup>1</sup>H NMR** (600 MHz, CDCl<sub>3</sub>) δ 7.47 (td, *J* = 7.5, 1.4 Hz, 1H), 7.42 – 7.39 (m, 3H), 7.31 (dd, *J* = 7.6, 1.4 Hz, 1H), 7.20 – 7.16 (m, 2H), 7.02 – 6.99 (m, 1H), 6.78 (dd, *J* = 7.7, 1.6 Hz, 1H), 6.69 (td, *J* = 7.4, 1.2 Hz, 1H), 6.52 – 6.51 (m, 1H), 4.26 (d, *J* = 14.5 Hz, 1H), 4.16 (br, 1H), 3.86 (d, *J* = 14.5 Hz, 1H).

**<sup>13</sup>C NMR** (151 MHz, CDCl<sub>3</sub>) δ 145.0, 142.4, 142.4, 140.1, 138.9, 133.9, 131.6, 131.1, 130.9, 129.5, 128.9, 128.6, 128.4, 128.3, 127.3, 121.7, 118.9, 118.3, 48.9.

**HRMS** (ESI) *m/z*: [M + H]<sup>+</sup> calcd for C<sub>19</sub>H<sub>15</sub>BrN 336.0382; found 336.0382.

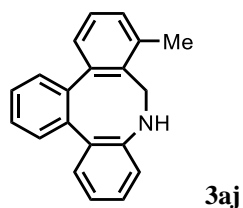

**11-methyl-9,10-dihydrotribenzo[b,d,f]azocine 3aj:** Yellow solid, actual mass 51.0 mg, 94% yield, (eluent: petroleum ether/ethyl acetate = 20:1).

**<sup>1</sup>H NMR** (600 MHz, CDCl<sub>3</sub>) δ 7.44 – 7.37 (m, 2H), 7.28 (dd, *J* = 7.6, 1.7 Hz, 1H), 7.22 (dd, *J* = 7.3, 1.6 Hz, 1H), 7.17 – 7.09 (m, 3H), 6.96 – 6.93 (m, 1H), 6.76 (dd, *J* = 7.7, 1.8 Hz, 1H), 6.66 – 6.63 (m, 1H), 6.46 (d, *J* = 8.1 Hz, 1H), 4.26 (d, *J* = 14.9 Hz, 1H), 4.12 (br, 1H), 4.07 (d, *J* = 14.8 Hz, 1H), 2.38 (s, 3H).

**<sup>13</sup>C NMR** (151 MHz, CDCl<sub>3</sub>) δ 145.9, 144.0, 142.8, 142.0, 135.1, 134.7, 133.7, 131.3, 129.7, 128.8, 128.8, 128.1, 128.0, 127.5, 127.2, 125.6, 118.7, 117.7, 45.6, 19.2.

**HRMS** (ESI) *m/z*: [M + H]<sup>+</sup> calcd for C<sub>20</sub>H<sub>18</sub>N 272.1434; found 272.1418.

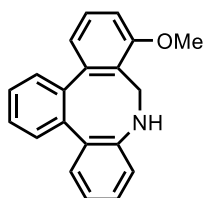

**3ak**

**11-methoxy-9,10-dihydrotribenzo[b,d,f]azocine 3ak:** Yellow solid, actual mass 54.0 mg, 94% yield, (eluent: petroleum ether/ethyl acetate = 10:1).

**<sup>1</sup>H NMR** (600 MHz, CDCl<sub>3</sub>) δ 7.43 – 7.35 (m, 2H), 7.29 – 7.27 (m, 1H), 7.23 – 7.20 (m, 2H), 6.96 – 6.91 (m, 2H), 6.79 – 6.75 (m, 2H), 6.64 – 6.61 (m, 1H), 6.49 – 6.47 (m, 1H), 4.32 (dd, *J* = 14.3, 2.3 Hz, 1H), 4.22 (br, 1H), 4.02 (dd, *J* = 14.3, 2.1 Hz, 1H), 3.81 (d, *J* = 1.3 Hz, 3H).

**<sup>13</sup>C NMR** (151 MHz, CDCl<sub>3</sub>) δ 156.4, 146.4, 144.9, 143.1, 141.1, 134.1, 131.6, 128.7, 128.4, 128.1, 127.9, 127.1, 125.2, 119.8, 118.2, 117.9, 109.4, 55.5, 42.4.

**HRMS** (ESI) *m/z*: [M + H]<sup>+</sup> calcd for C<sub>20</sub>H<sub>18</sub>NO 288.1383; found 288.1368.

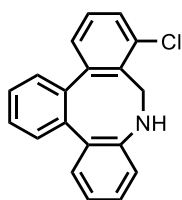

**3al**

**11-chloro-9,10-dihydrotribenzo[b,d,f]azocine 3al:** Yellow solid, actual mass 39.6 mg, 68% yield, (eluent: petroleum ether/ethyl acetate = 20:1).

**<sup>1</sup>H NMR** (600 MHz, CDCl<sub>3</sub>) δ 7.46 (t, *J* = 7.5 Hz, 1H), 7.40 (t, *J* = 7.4 Hz, 1H), 7.31 – 7.29 (m, 2H), 7.24 – 7.18 (m, 3H), 6.98 (t, *J* = 7.6 Hz, 1H), 6.76 (d, *J* = 7.5 Hz, 1H), 6.66 (t, *J* = 7.4 Hz, 1H), 6.53 (d, *J* = 8.1 Hz, 1H), 4.33 – 4.30 (m, 2H), 4.23 (d, *J* = 14.3 Hz, 1H).

**<sup>13</sup>C NMR** (151 MHz, CDCl<sub>3</sub>) δ 145.7, 145.5, 142.9, 140.8, 134.5, 134.0, 133.2, 131.7, 128.7, 128.7, 128.6, 128.6, 128.2, 128.0, 127.3, 126.3, 118.7, 118.1, 46.1.

**HRMS** (ESI) *m/z*: [M + H]<sup>+</sup> calcd for C<sub>19</sub>H<sub>15</sub>ClN 292.0888; found 292.0892.

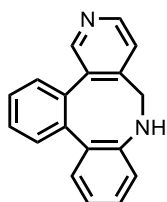

**3am**

**9,10-dihydrodibenzo[b,d]pyrido[3,4-f]azocine 3am:** Colorless oil, actual mass 16.5 mg, 32% yield, (eluent: petroleum ether/ethyl acetate = 5:1).

**<sup>1</sup>H NMR** (600 MHz, CDCl<sub>3</sub>) δ 8.53 – 8.52 (m, 2H), 7.51 (t, *J* = 7.5 Hz, 1H), 7.45 (t, *J* = 7.5 Hz, 1H), 7.35 (d, *J* = 7.6 Hz, 1H), 7.24 (d, *J* = 7.5 Hz, 1H), 7.17 (d, *J* = 5.0 Hz, 1H), 7.04 – 7.01 (m, 1H), 6.83 (d, *J* = 7.6 Hz, 1H), 6.74 (t, *J* = 7.4 Hz, 1H), 6.57 (d, *J* = 8.1 Hz, 1H), 4.34 (d, *J* = 14.5 Hz, 1H), 4.10 (br, 1H), 3.95 (d, *J* = 14.5 Hz, 1H).

**<sup>13</sup>C NMR** (151 MHz, CDCl<sub>3</sub>) δ 149.4, 148.9, 145.2, 144.8, 142.6, 138.8, 137.4, 133.6, 131.6, 129.2, 129.1, 128.5, 127.6, 122.8, 119.9, 119.0, 49.0.

**HRMS** (ESI) *m/z*: [M + H]<sup>+</sup> calcd for C<sub>18</sub>H<sub>15</sub>N<sub>2</sub> 259.1230; found 259.1217.



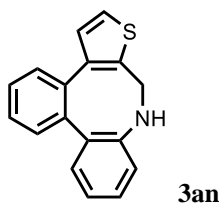

**8,9-dihydrodibenzo[b,d]thieno[3,2-f]azocine 3an:** Colorless oil, actual mass 15.8 mg, 30% yield, (eluent: petroleum ether/ethyl acetate = 20:1).

$^1\text{H NMR}$  (600 MHz,  $\text{CDCl}_3$ )  $\delta$  7.47 – 7.40 (m, 2H), 7.38 – 7.34 (m, 2H), 7.22 – 7.18 (m, 1H), 7.10 – 7.06 (m, 2H), 7.00 – 6.93 (m, 2H), 6.86 (d,  $J = 5.1$  Hz, 1H), 4.54 (d,  $J = 16.4$  Hz, 1H), 4.37 (d,  $J = 16.4$  Hz, 1H), 3.81 (br, 1H).

$^{13}\text{C NMR}$  (151 MHz,  $\text{CDCl}_3$ )  $\delta$  145.6, 139.9, 139.6, 136.8, 136.8, 134.5, 131.1, 130.5, 129.7, 128.7, 128.1, 127.5, 122.7, 122.2, 122.0, 48.2.

**HRMS** (ESI)  $m/z$ :  $[\text{M} + \text{H}]^+$  calcd for  $\text{C}_{17}\text{H}_{14}\text{NS}$  264.0841; found 264.0833.

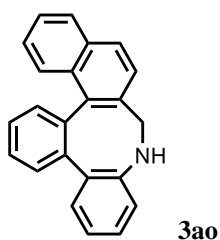

**7,8-dihydrodibenzo[b,d]naphtho[1,2-f]azocine 3ao:** Colorless oil, actual mass 46.7 mg, 76% yield, (eluent: petroleum ether/ethyl acetate = 20:1).

$^1\text{H NMR}$  (600 MHz,  $\text{CDCl}_3$ )  $\delta$  7.87 – 7.81 (m, 3H), 7.55 – 7.32 (m, 7H), 6.93 (t,  $J = 7.6$  Hz, 1H), 6.86 (d,  $J = 7.6$  Hz, 1H), 6.61 (t,  $J = 7.4$  Hz, 1H), 6.45 (d,  $J = 8.1$  Hz, 1H), 4.42 (d,  $J = 14.0$  Hz, 1H), 4.21 (br, 1H), 4.04 (d,  $J = 14.3$  Hz, 1H).

$^{13}\text{C NMR}$  (151 MHz,  $\text{CDCl}_3$ )  $\delta$  145.2, 143.7, 139.6, 138.5, 133.4, 133.2, 133.1, 131.8, 131.2, 130.5, 128.8, 128.4, 128.3, 128.0, 127.9, 126.6, 126.3, 126.2, 126.1, 125.5, 118.5, 118.0, 49.8.

**HRMS** (ESI)  $m/z$ :  $[\text{M} + \text{H}]^+$  calcd for  $\text{C}_{23}\text{H}_{18}\text{N}$  308.1434; found 308.1436.

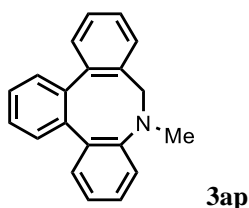

**9-methyl-9,10-dihydrotribenzo[b,d,f]azocine 3ap:** Colorless oil, actual mass 49.9 mg, 92% yield, (eluent: petroleum ether/ethyl acetate = 20:1).

$^1\text{H NMR}$  (600 MHz,  $\text{CDCl}_3$ )  $\delta$  7.44 – 7.38 (m, 2H), 7.29 – 7.20 (m, 6H), 7.10 – 7.07 (m, 1H), 6.77 – 6.70 (m, 3H), 4.52 (d,  $J = 13.5$  Hz, 1H), 3.87 (d,  $J = 13.5$  Hz, 1H), 3.04 (s, 3H).

$^{13}\text{C NMR}$  (151 MHz,  $\text{CDCl}_3$ )  $\delta$  148.5, 143.6, 143.2, 141.0, 135.7, 133.5, 132.9, 130.6, 129.1, 128.2, 127.9, 127.8, 127.7, 127.6, 127.1, 119.6, 118.6, 58.8, 44.1.

**HRMS** (ESI)  $m/z$ :  $[\text{M} + \text{H}]^+$  calcd for  $\text{C}_{20}\text{H}_{18}\text{N}$  272.1434; found 272.1415.

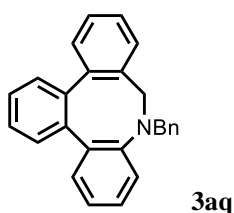

**9-benzyl-9,10-dihydrotribenzo[b,d,f]azocine 3aq:** Yellow solid, actual mass 41.6 mg, 60% yield, (eluent: petroleum ether/ethyl acetate = 20:1).

$^1\text{H NMR}$  (600 MHz,  $\text{CDCl}_3$ )  $\delta$  7.43 – 7.39 (m, 2H), 7.29 – 7.16 (m, 11H), 7.11 – 7.08 (m, 1H), 7.00 (d,  $J = 8.1$  Hz, 1H), 6.81 – 6.80 (m, 2H), 4.48 – 4.41 (m, 2H), 4.26 (d,  $J = 12.6$  Hz, 1H), 3.84 (d,  $J = 12.6$  Hz, 1H).

$^{13}\text{C NMR}$  (151 MHz,  $\text{CDCl}_3$ )  $\delta$  148.4, 143.1, 142.6, 141.1, 139.5, 136.2, 136.1, 131.9, 130.4, 129.5, 128.3, 128.2, 128.2, 128.1, 127.8, 127.6, 127.5, 127.5, 127.1, 126.9, 122.4, 121.3, 61.3, 56.1.

**HRMS** (ESI)  $m/z$ :  $[\text{M} + \text{H}]^+$  calcd for  $\text{C}_{26}\text{H}_{22}\text{N}$  348.1747; found 348.1745.

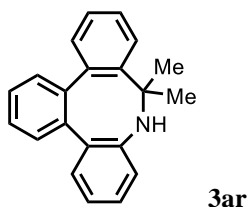

**10,10-dimethyl-9,10-dihydrotribenzo[b,d,f]azocine 3ar:** Colorless oil, actual mass 43.9 mg, 77% yield, (eluent: petroleum ether/ethyl acetate = 20:1).

$^1\text{H NMR}$  (600 MHz,  $\text{CDCl}_3$ )  $\delta$  7.46 – 7.45 (m, 2H), 7.39 – 7.38 (m, 1H), 7.31 – 7.29 (m, 1H), 7.25 – 7.24 (m, 1H), 7.21 (dd,  $J = 7.5, 1.3$  Hz, 1H), 7.18 – 7.13 (m, 3H), 7.07 (td,  $J = 7.4, 1.1$  Hz, 1H), 7.00 (td,  $J = 7.4, 1.3$  Hz, 1H), 6.84 (dd,  $J = 7.5, 1.4$  Hz, 1H), 3.42 (br, 1H), 1.91 (s, 3H), 1.33 (s, 3H).

$^{13}\text{C NMR}$  (151 MHz,  $\text{CDCl}_3$ )  $\delta$  145.4, 145.4, 144.4, 140.3, 138.6, 138.5, 133.1, 130.4, 128.7, 128.2, 127.9, 127.5, 127.5, 126.0, 125.9, 125.2, 124.2, 60.1, 32.2, 30.4.

**HRMS** (ESI)  $m/z$ :  $[\text{M} + \text{H}]^+$  calcd for  $\text{C}_{21}\text{H}_{20}\text{N}$  286.1590; found 286.1570.

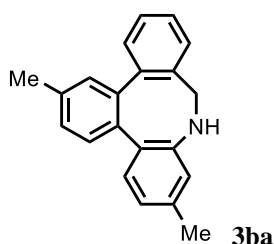

**2,7-dimethyl-9,10-dihydrotribenzo[b,d,f]azocine 3ba:** Colorless oil, actual mass 24.5 mg, 43% yield, (eluent: petroleum ether/ethyl acetate = 20:1).

$^1\text{H NMR}$  (600 MHz,  $\text{CDCl}_3$ )  $\delta$  7.31 – 7.17 (m, 6H), 7.02 (s, 1H), 6.67 (d,  $J = 7.7$  Hz, 1H), 6.47 (d,  $J = 7.7$  Hz, 1H), 6.28 (s, 1H), 4.32 (d,  $J = 14.4$  Hz, 1H), 4.11 (br, 1H), 3.86 (d,  $J = 14.4$  Hz, 1H), 2.41 (s, 3H), 2.15 (s, 3H).

$^{13}\text{C NMR}$  (151 MHz,  $\text{CDCl}_3$ )  $\delta$  145.3, 143.6, 141.1, 139.7, 137.6, 136.9, 136.7, 133.9, 131.4, 129.9, 128.8, 128.1, 128.0, 127.8, 127.8, 125.8, 119.7, 118.6, 49.1, 21.0, 20.8.

**HRMS** (ESI)  $m/z$ :  $[\text{M} + \text{H}]^+$  calcd for  $\text{C}_{21}\text{H}_{20}\text{N}$  286.1590; found 286.1570.

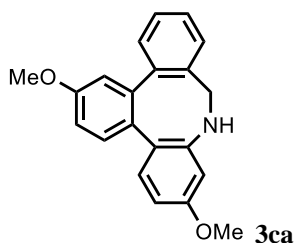

**2,7-dimethoxy-9,10-dihydrotribenzo[b,d,f]azocine 3ca:** Yellow solid, actual mass 35.5 mg, 56% yield, (eluent: petroleum ether/ethyl acetate = 10:1).

**<sup>1</sup>H NMR** (600 MHz, CDCl<sub>3</sub>) δ 7.33 – 7.25 (m, 4H), 7.19 (d, *J* = 8.4 Hz, 1H), 6.97 (dd, *J* = 8.4, 2.8 Hz, 1H), 6.76 (d, *J* = 2.7 Hz, 1H), 6.68 (d, *J* = 8.5 Hz, 1H), 6.24 (dd, *J* = 8.5, 2.5 Hz, 1H), 6.01 (d, *J* = 2.5 Hz, 1H), 4.34 (d, *J* = 14.4 Hz, 1H), 4.17 (br, 1H), 3.87 (d, *J* = 14.4 Hz, 1H), 3.85 (s, 3H), 3.68 (s, 3H).

**<sup>13</sup>C NMR** (151 MHz, CDCl<sub>3</sub>) δ 159.3, 158.7, 146.6, 143.5, 142.5, 136.8, 135.0, 134.8, 132.6, 128.2, 128.2, 127.8, 127.7, 121.3, 114.6, 113.4, 104.6, 102.9, 55.3, 54.9, 49.0.

**HRMS** (ESI) *m/z*: [M + H]<sup>+</sup> calcd for C<sub>21</sub>H<sub>20</sub>NO<sub>2</sub> 318.1489; found 318.1492.

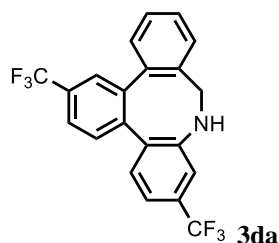

**2,7-bis(trifluoromethyl)-9,10-dihydrotribenzo[b,d,f]azocine 3da**: Yellow solid, actual mass 31.4 mg, 40% yield, (eluent: petroleum ether/ethyl acetate = 20:1).

**<sup>1</sup>H NMR** (600 MHz, CDCl<sub>3</sub>) δ 7.73 (d, *J* = 8.0 Hz, 1H), 7.50 (s, 1H), 7.40 – 7.30 (m, 5H), 6.89 – 6.83 (m, 2H), 6.72 (s, 1H), 4.41 (br, 1H), 4.27 (dd, *J* = 14.6, 7.5 Hz, 1H), 3.95 (dd, *J* = 14.6, 7.0 Hz, 1H).

**<sup>13</sup>C NMR** (151 MHz, CDCl<sub>3</sub>) δ 145.9, 145.1, 141.9, 141.7, 135.8, 134.4, 131.9, 130.9 (q, *J* = 32.3 Hz), 130.0 (q, *J* = 32.6 Hz), 130.0, 129.2, 128.6, 128.5, 127.7, 126.0 (q, *J* = 3.6 Hz), 125.2 (q, *J* = 3.7 Hz), 124.1 (q, *J* = 272.2 Hz), 123.9 (q, *J* = 272.4 Hz), 114.9 (q, *J* = 3.7 Hz), 48.68.

**HRMS** (ESI) *m/z*: [M + H]<sup>+</sup> calcd for C<sub>21</sub>H<sub>14</sub>F<sub>6</sub>N 394.1025; found 394.1026.

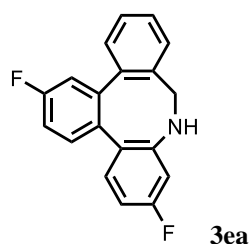

**2,7-difluoro-9,10-dihydrotribenzo[b,d,f]azocine 3ea**: Yellow solid, actual mass 44.0 mg, 75% yield, (eluent: petroleum ether/ethyl acetate = 20:1).

**<sup>1</sup>H NMR** (600 MHz, CDCl<sub>3</sub>) δ 7.36 – 7.27 (m, 4H), 7.23 – 7.21 (m, 1H), 7.14 (td, *J* = 8.4, 2.7 Hz, 1H), 6.95 (dd, *J* = 9.2, 2.7 Hz, 1H), 6.68 (dd, *J* = 8.5, 6.7 Hz, 1H), 6.35 (td, *J* = 8.2, 2.5 Hz, 1H), 6.18 (dd, *J* = 10.8, 2.5 Hz, 1H), 4.30 (d, *J* = 14.5 Hz, 1H), 4.25 (br, 1H), 3.90 (d, *J* = 14.5 Hz, 1H).

**<sup>13</sup>C NMR** (151 MHz, CDCl<sub>3</sub>) δ 162.7 (d, *J*<sub>C-F</sub> = 244.9 Hz), 162.2 (d, *J*<sub>C-F</sub> = 247.4 Hz), 147.2 (d, *J*<sub>C-F</sub> = 10.2 Hz), 143.3 (d, *J*<sub>C-F</sub> = 7.8 Hz), 142.3 (d, *J*<sub>C-F</sub> = 1.5 Hz), 137.7 (d, *J*<sub>C-F</sub> = 3.3 Hz), 136.2, 135.3 (d, *J*<sub>C-F</sub> = 9.6 Hz), 133.1 (d, *J*<sub>C-F</sub> = 8.2 Hz), 128.7, 128.4, 128.1, 127.6, 123.5 (d, *J*<sub>C-F</sub> = 2.7 Hz), 115.9 (d, *J*<sub>C-F</sub> = 21.6 Hz), 114.9 (d, *J*<sub>C-F</sub> = 20.8 Hz), 105.7 (d, *J*<sub>C-F</sub> = 21.2 Hz), 104.2 (d, *J*<sub>C-F</sub> = 24.0 Hz), 48.8.

**HRMS** (ESI) *m/z*: [M + H]<sup>+</sup> calcd for C<sub>19</sub>H<sub>14</sub>F<sub>2</sub>N 294.1089; found 294.1090.

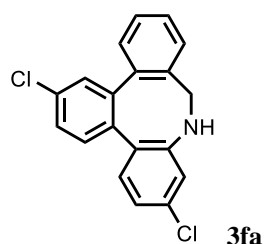

**2,7-dichloro-9,10-dihydrotribenzo[b,d,f]azocine 3fa:** Yellow solid, actual mass 28.6 mg, 44% yield, (eluent: petroleum ether/ethyl acetate = 20:1).

$^1\text{H NMR}$  (600 MHz,  $\text{CDCl}_3$ )  $\delta$  7.42 (dd,  $J = 8.2, 2.3$  Hz, 1H), 7.35 – 7.26 (m, 4H), 7.22 – 7.18 (m, 2H), 6.65 – 6.60 (m, 2H), 6.46 (d,  $J = 2.0$  Hz, 1H), 4.28 (d,  $J = 14.8$  Hz, 1H), 4.23 (br, 1H), 3.89 (d,  $J = 13.2$  Hz, 1H).

$^{13}\text{C NMR}$  (151 MHz,  $\text{CDCl}_3$ )  $\delta$  146.7, 142.9, 141.9, 140.1, 136.1, 134.9, 1338, 133.5, 132.6, 129.1, 128.9, 128.4, 128.3, 128.2, 127.6, 125.7, 118.7, 117.6, 48.7.

**HRMS** (ESI)  $m/z$ :  $[\text{M} + \text{H}]^+$  calcd for  $\text{C}_{19}\text{H}_{14}\text{Cl}_2\text{N}$  326.0498; found 326.0509.

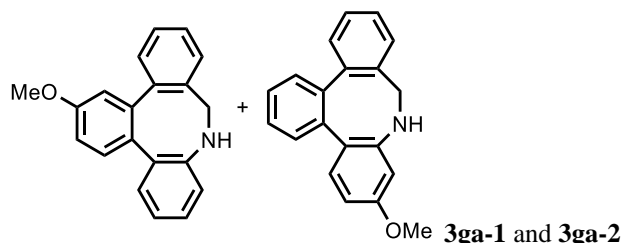

**2-methoxy-9,10-dihydrotribenzo[b,d,f]azocine and 7-methoxy-9,10-dihydrotribenzo[b,d,f]azocine 3ga-1 and 3ga-2:**

Yellow solid, actual mass 37.9 mg, 66% yield, (eluent: petroleum ether/ethyl acetate = 20:1).

$^1\text{H NMR}$  (600 MHz,  $\text{CDCl}_3$ )  $\delta$  7.43 – 7.19 (m, 6.5H), 7.00 – 6.93 (m, 1H), 6.77 – 6.76 (m, 1H), 6.70 – 6.63 (m, 1H), 6.46 (d,  $J = 8.0$  Hz, 0.5H), 6.25 (dd,  $J = 8.5, 2.4$  Hz, 0.5H), 6.01 (d,  $J = 2.4$  Hz, 0.5H), 4.35 – 4.29 (m, 1H), 3.90 – 3.87 (m, 1H), 3.84 (s, 1.5H), 3.67 (s, 1.5H).

$^{13}\text{C NMR}$  (151 MHz,  $\text{CDCl}_3$ )  $\delta$  159.4, 158.8, 146.6, 145.6, 143.5, 143.4, 142.4, 142.4, 141.4, 136.7, 135.0, 135.0, 134.0, 132.4, 131.6, 129.0, 128.3, 128.2, 128.2, 128.1, 128.1, 127.8, 127.8, 127.8, 127.7, 126.9, 121.7, 118.6, 118.1, 114.6, 113.5, 104.7, 102.9, 55.3, 54.9, 49.3, 48.9.

**HRMS** (ESI)  $m/z$ :  $[\text{M} + \text{H}]^+$  calcd for  $\text{C}_{20}\text{H}_{18}\text{NO}$  288.1383; found 288.1372.

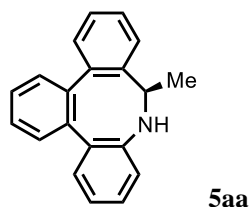

**(R)-10-methyl-9,10-dihydrotribenzo[b,d,f]azocine 5aa:** White solid, actual mass 40.1 mg, 74% yield, (eluent: petroleum ether/ethyl acetate = 20:1).  $[\alpha]_{\text{D}}^{25} = -195.8$  ( $c = 0.2$ ,  $\text{CHCl}_3$ ).

$^1\text{H NMR}$  (600 MHz,  $\text{CDCl}_3$ )  $\delta$  7.46 – 7.39 (m, 2H), 7.35 – 7.21 (m, 6H), 6.95 – 6.92 (m, 1H), 6.77 (dd,  $J = 7.6, 1.5$  Hz, 1H), 6.65 – 6.62 (m, 1H), 6.42 – 6.41 (m, 1H), 4.69 (q,  $J = 6.7$  Hz, 1H), 3.58 (br, 1H), 1.48 (d,  $J = 6.7$  Hz, 3H).

$^{13}\text{C NMR}$  (151 MHz,  $\text{CDCl}_3$ )  $\delta$  146.0, 143.1, 143.1, 141.3, 140.3, 133.8, 131.1, 128.9, 128.4, 128.2, 128.2, 128.0, 127.8, 127.3, 127.2, 123.1, 118.5, 118.0, 50.5, 20.3.

**HRMS** (ESI)  $m/z$ :  $[\text{M} + \text{H}]^+$  calcd for  $\text{C}_{20}\text{H}_{18}\text{N}$  272.1434; found 272.1421.

**HPLC** (Daicel CHIRALPAK AD-H,  $n$ -hexane : isopropanol = 98.5 : 1.5, Flow rate = 1.0 mL/min,  $\lambda = 220$  nm)

:  $t_{\text{R}} = 8.23$  min (major enantiomer),  $t_{\text{R}} = 6.72$  min (minor enantiomer).

<chromatogram>

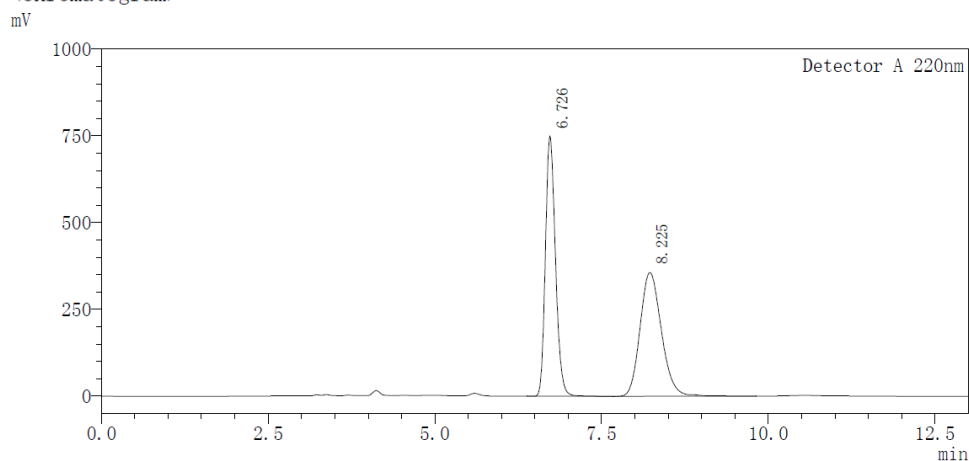

<Peak table>

| Peak# | Ret. Time | Height  | Area     | Area%   |
|-------|-----------|---------|----------|---------|
| 1     | 6.726     | 748765  | 7845879  | 49.713  |
| 2     | 8.225     | 356603  | 7936550  | 50.287  |
| Total |           | 1105368 | 15782430 | 100.000 |

<chromatogram>

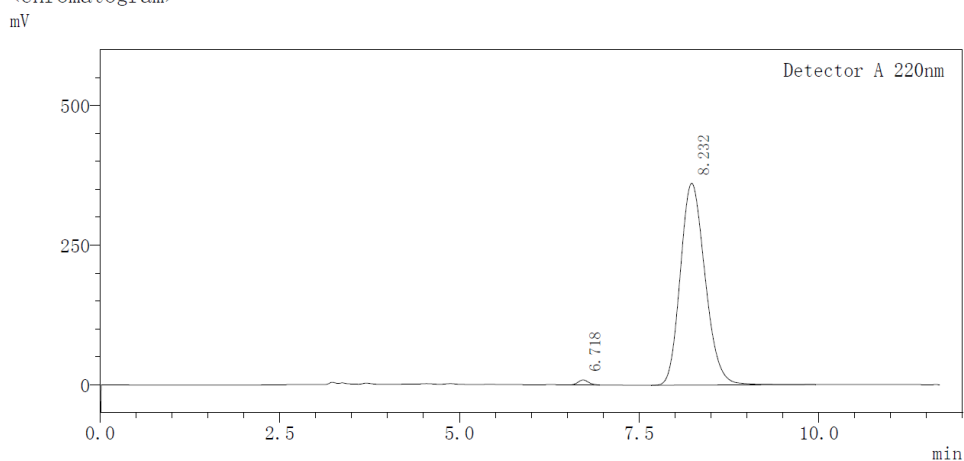

<Peak table>

| Peak# | Ret. Time | Height | Area    | Area%   |
|-------|-----------|--------|---------|---------|
| 1     | 6.718     | 8742   | 86779   | 0.992   |
| 2     | 8.232     | 361516 | 8662854 | 99.008  |
| Total |           | 370259 | 8749633 | 100.000 |

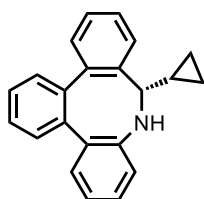

**5ab**

**(S)-10-cyclopropyl-9,10-dihydrotribenzo[b,d,f]azocine 5ab:** Colorless oil, actual mass 39.2 mg, 66% yield, (eluent: petroleum ether/ethyl acetate = 20:1).  $[\alpha]_D^{25} = +169.1$  (c = 0.2, CHCl<sub>3</sub>).

**<sup>1</sup>H NMR** (600 MHz, CDCl<sub>3</sub>)  $\delta$  7.53 (d, *J* = 7.7 Hz, 1H), 7.44 – 7.24 (m, 6H), 7.19 (dd, *J* = 7.3, 1.3 Hz, 1H), 6.96 – 6.92 (m, 1H), 6.75 (dd, *J* = 7.6, 1.5 Hz, 1H), 6.65 – 6.61 (m, 1H), 6.46 (d, *J* = 8.0 Hz, 1H), 3.91 (br, 1H), 3.59 (d, *J* = 9.4 Hz, 1H), 1.37 – 1.29 (m, 1H), 0.73 – 0.66 (m, 1H), 0.50 – 0.35 (m, 2H), -0.07 – -0.13 (m, 1H).

**<sup>13</sup>C NMR** (101 MHz, CDCl<sub>3</sub>)  $\delta$  145.9, 143.1, 142.9, 141.3, 140.2, 133.6, 131.1, 128.8, 128.6, 128.1, 128.1, 128.0, 127.6, 127.3, 127.2, 124.5, 118.6, 118.1, 61.6, 15.5, 5.4, 3.4.

**HRMS** (ESI) *m/z*: [M + H]<sup>+</sup> calcd for C<sub>22</sub>H<sub>20</sub>N 298.1590; found 298.1577.

**HPLC** (Daicel CHIRALPAK AD-H, *n*-hexane : isopropanol = 98.5 : 1.5, Flow rate = 1.0 mL/min,  $\lambda$  = 220 nm):  $t_R$  = 8.73 min (major enantiomer),  $t_R$  = 6.16 min (minor enantiomer).

<chromatogram>  
mV

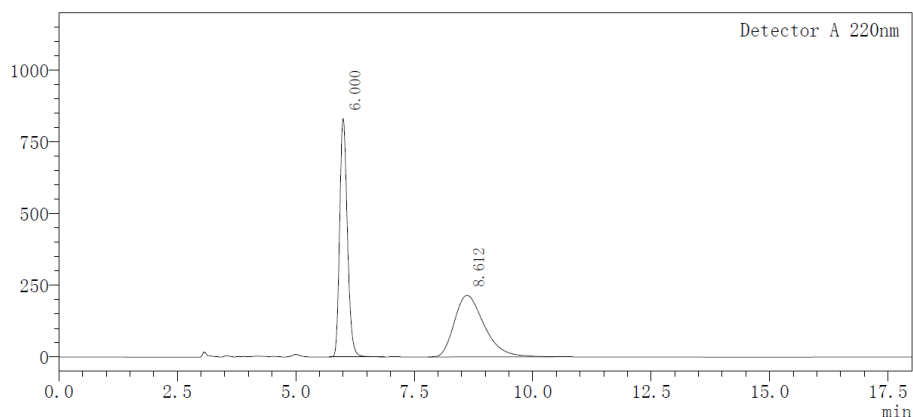

<Peak table>

| Peak# | Ret. Time | Height  | Area     | Area%   |
|-------|-----------|---------|----------|---------|
| 1     | 6.000     | 832133  | 9352587  | 49.824  |
| 2     | 8.612     | 214721  | 9418674  | 50.176  |
| Total |           | 1046854 | 18771262 | 100.000 |

<chromatogram>  
mV

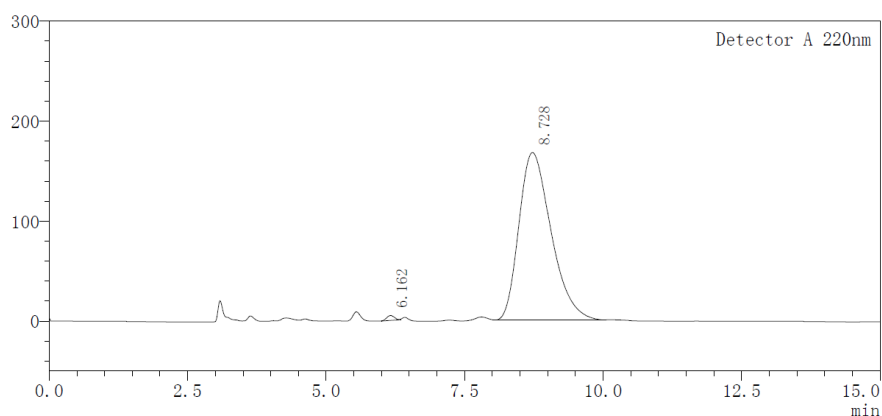

<Peak table>

| Peak# | Ret. Time | Height | Area    | Area%   |
|-------|-----------|--------|---------|---------|
| 1     | 6.162     | 4881   | 48836   | 0.718   |
| 2     | 8.728     | 167413 | 6748352 | 99.282  |
| Total |           | 172294 | 6797188 | 100.000 |

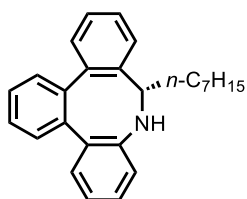

**5ac**

**(S)-10-heptyl-9,10-dihydrotribenzo[b,d,f]azocine 5ac**: Yellow oil, actual mass 53.3 mg, 75% yield, (eluent: petroleum ether/ethyl acetate = 20:1).  $[\alpha]_D^{25} = +188.6$  (c = 0.2,  $\text{CHCl}_3$ ).

$^1\text{H NMR}$  (600 MHz,  $\text{CDCl}_3$ )  $\delta$  7.44 (td,  $J = 7.5, 1.4$  Hz, 1H), 7.39 (td,  $J = 7.5, 1.3$  Hz, 1H), 7.33 – 7.21 (m, 6H), 6.94 – 6.91 (m, 1H), 6.76 (dd,  $J = 7.6, 1.5$  Hz, 1H), 6.63 – 6.61 (m, 1H), 6.41 – 6.40 (m, 1H), 4.50 (t,  $J = 7.3$  Hz, 1H), 3.55 (br, 1H), 1.90 – 1.81 (m, 2H), 1.25 – 1.16 (m, 10H), 0.83 (t,  $J = 7.1$  Hz, 3H).

$^{13}\text{C NMR}$  (151 MHz,  $\text{CDCl}_3$ )  $\delta$  146.1, 143.6, 143.3, 141.3, 139.5, 133.9, 131.1, 128.7, 128.2, 128.2, 128.1, 128.0, 127.7, 127.2, 127.1, 123.4, 118.3, 117.9, 55.2, 34.3, 31.7, 29.3, 29.0, 26.6, 22.5, 14.1.

**HRMS** (ESI)  $m/z$ :  $[\text{M} + \text{H}]^+$  calcd for  $\text{C}_{26}\text{H}_{30}\text{N}$  356.2373; found 356.2365.

**HPLC** (Daicel CHIRALPAK AD-H, *n*-hexane : isopropanol = 98.5 : 1.5, Flow rate = 1.0 mL/min,  $\lambda$  = 220 nm):  $t_R$  = 5.73 min (major enantiomer),  $t_R$  = 4.15 min (minor enantiomer).

<chromatogram>  
mV

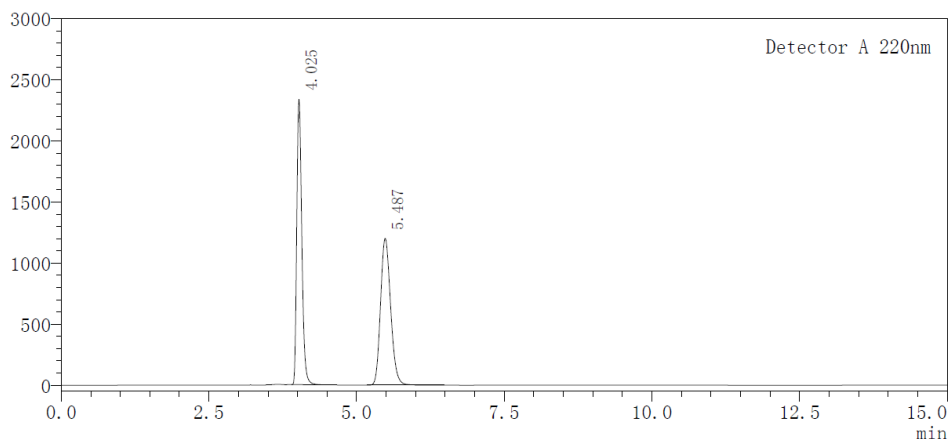

<Peak table>

| Peak# | Ret. Time | Height  | Area     | Area%   |
|-------|-----------|---------|----------|---------|
| 1     | 4.025     | 2339266 | 13893471 | 49.250  |
| 2     | 5.487     | 1201677 | 14316338 | 50.750  |
| Total |           | 3540943 | 28209809 | 100.000 |

<chromatogram>  
mV

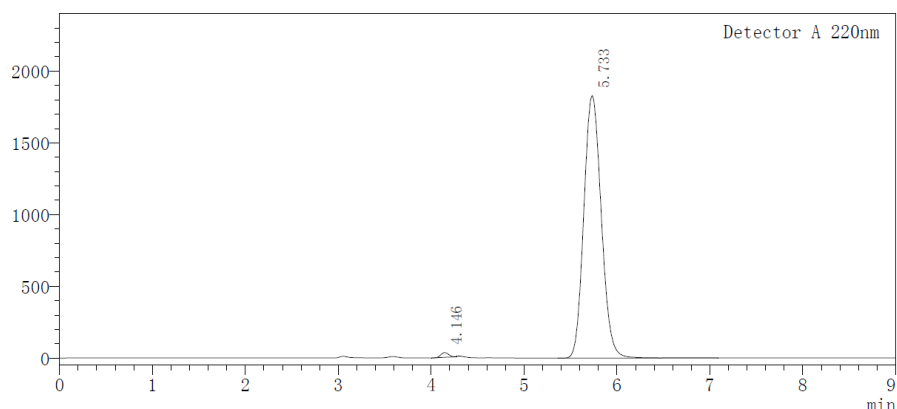

<Peak table>

| Peak# | Ret. Time | Height  | Area     | Area%   |
|-------|-----------|---------|----------|---------|
| 1     | 4.146     | 32125   | 186524   | 0.772   |
| 2     | 5.733     | 1828874 | 23969598 | 99.228  |
| Total |           | 1860999 | 24156121 | 100.000 |

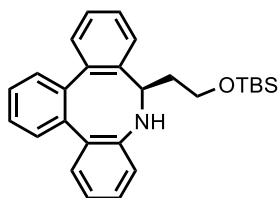

**5ad**

**(R)-10-(2-((tert-butyldimethylsilyloxy)ethyl)-9,10-dihydrotribenzo[b,d,f]azocine 5ad:** Yellow oil, actual mass 52.7 mg, 65% yield, (eluent: petroleum ether/ethyl acetate = 10:1).  $[\alpha]_D^{25} = -178.7$  ( $c = 0.2$ ,  $\text{CHCl}_3$ ).

$^1\text{H NMR}$  (600 MHz,  $\text{CDCl}_3$ )  $\delta$  7.44 (td,  $J = 7.5, 1.3$  Hz, 1H), 7.39 (td,  $J = 7.5, 1.3$  Hz, 1H), 7.34 – 7.21 (m, 6H), 6.96 – 6.93 (m, 1H), 6.77 (dd,  $J = 7.6, 1.5$  Hz, 1H), 6.65 – 6.62 (m, 1H), 6.43 – 6.41 (m, 1H), 4.75 – 4.73 (m, 1H), 3.71 – 3.60 (m, 3H), 2.14 – 2.01 (m, 2H), 0.76 (s, 9H), -0.09 and -0.11 (2s, 6H).

$^{13}\text{C NMR}$  (151 MHz,  $\text{CDCl}_3$ )  $\delta$  146.1, 143.5, 143.1, 141.1, 139.5, 134.1, 131.2, 128.9, 128.2, 128.2, 128.1, 127.9, 127.8, 127.3, 127.2, 123.6, 118.3, 117.9, 60.1, 51.8, 37.9, 25.8, 18.1, -5.5, -5.6.

**HRMS** (ESI)  $m/z$ :  $[\text{M} + \text{H}]^+$  calcd for  $\text{C}_{27}\text{H}_{34}\text{NOSi}$  416.2404; found 416.2390.

**HPLC** (Daicel CHIRALPAK OD-H, *n*-hexane : isopropanol = 99 : 1, Flow rate = 1.0 mL/min,  $\lambda = 220$  nm):  $t_R = 4.67$  min (major enantiomer),  $t_R = 5.23$  min (minor enantiomer).

<chromatogram>  
mV

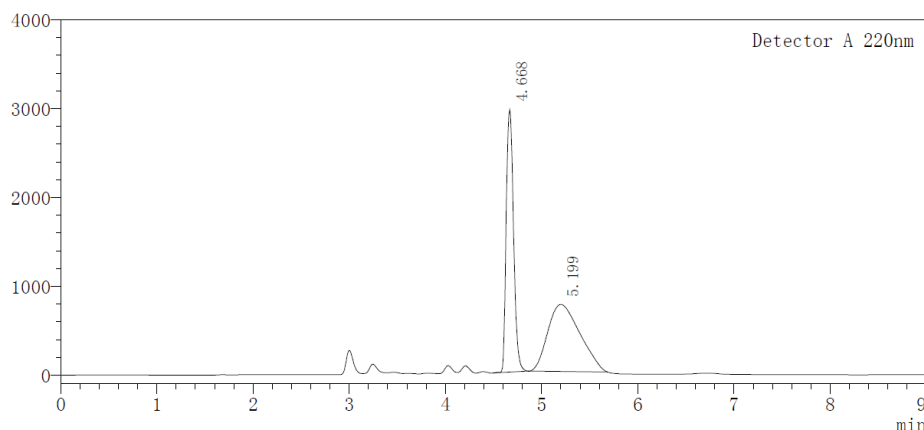

<Peak table>

| Peak# | Ret. Time | Height  | Area     | Area%   |
|-------|-----------|---------|----------|---------|
| 1     | 4.668     | 2956853 | 15692007 | 47.211  |
| 2     | 5.199     | 754805  | 17546114 | 52.789  |
| Total |           | 3711658 | 33238121 | 100.000 |

<chromatogram>  
mV

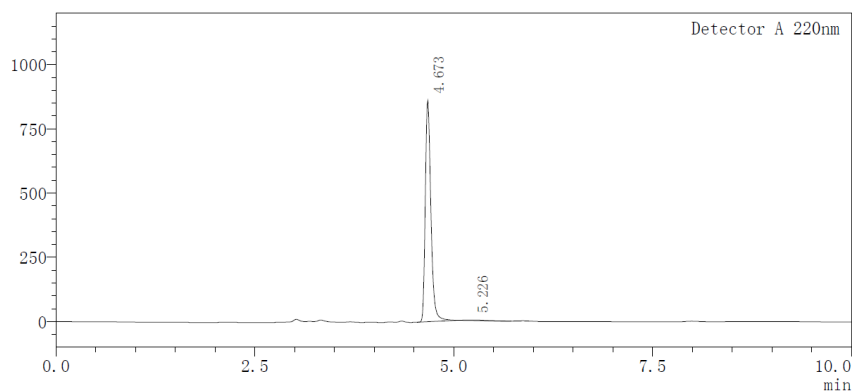

<Peak table>

| Peak# | Ret. Time | Height | Area    | Area%   |
|-------|-----------|--------|---------|---------|
| 1     | 4.673     | 859706 | 4234824 | 99.076  |
| 2     | 5.226     | 2285   | 39483   | 0.924   |
| Total |           | 861991 | 4274307 | 100.000 |

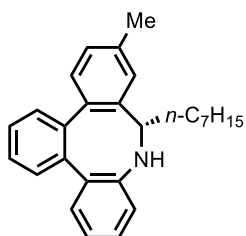

**5ae**

**(S)-10-heptyl-12-methyl-9,10-dihydrotribenzo[b,d,f]azocine 5ae:** Yellow oil, actual mass 56.1 mg, 76% yield, (eluent: petroleum ether/ethyl acetate = 20:1).  $[\alpha]_D^{25} = +172.1$  ( $c = 0.2$ ,  $\text{CHCl}_3$ ).

$^1\text{H NMR}$  (600 MHz,  $\text{CDCl}_3$ )  $\delta$  7.45 – 7.38 (m, 2H), 7.31 – 7.29 (m, 1H), 7.22 – 7.18 (m, 2H), 7.08 – 7.06 (m, 2H), 6.97 – 6.94 (m, 1H), 6.78 (dd,  $J = 7.6, 1.3$  Hz, 1H), 6.64 (t,  $J = 7.3$  Hz, 1H), 6.43 (d,  $J = 7.9$  Hz, 1H), 4.50 (t,  $J = 7.2$  Hz, 1H), 3.55 (br, 1H), 2.36 (s, 3H), 1.90 – 1.81 (m, 2H), 1.27 – 1.19 (m, 10H), 0.86 (t,  $J = 7.1$  Hz, 3H).

$^{13}\text{C NMR}$  (151 MHz,  $\text{CDCl}_3$ )  $\delta$  146.2, 143.3, 141.3, 140.8, 139.3, 137.7, 134.0, 131.1, 128.8, 128.2, 128.0, 127.9, 127.9, 127.5, 127.2, 124.0, 118.2, 117.8, 55.1, 34.3, 31.7, 29.3, 28.9, 26.6, 22.5, 21.6, 14.1.



**HRMS** (ESI)  $m/z$ :  $[M + H]^+$  calcd for  $C_{27}H_{32}N$  370.2529; found 370.2521.

**HPLC** (Daicel CHIRALPAK AD-H, *n*-hexane : isopropanol = 99 : 1, Flow rate = 1.0 mL/min,  $\lambda$  = 220 nm):  $t_R$  = 5.70 min (major enantiomer),  $t_R$  = 4.52 min (minor enantiomer).

<chromatogram>  
mV

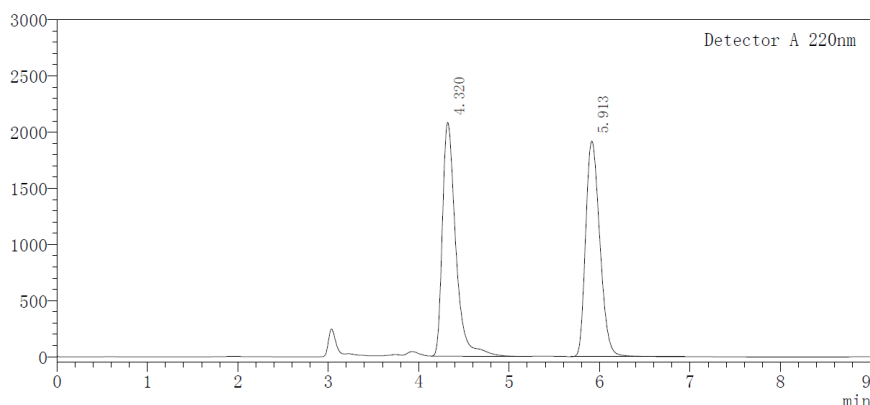

<Peak table>

| Peak# | Ret. Time | Height  | Area     | Area%   |
|-------|-----------|---------|----------|---------|
| 1     | 4.320     | 2079900 | 21364979 | 50.539  |
| 2     | 5.913     | 1918589 | 20909201 | 49.461  |
| Total |           | 3998489 | 42274179 | 100.000 |

<chromatogram>  
mV

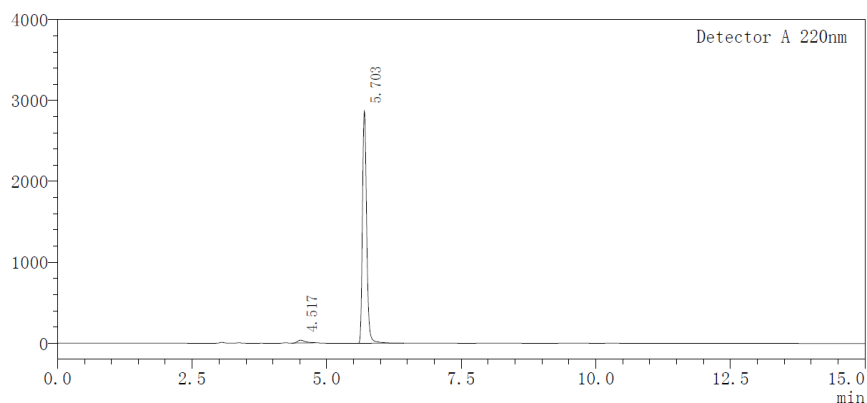

<Peak table>

| Peak# | Ret. Time | Height  | Area     | Area%   |
|-------|-----------|---------|----------|---------|
| 1     | 4.517     | 34597   | 349845   | 2.182   |
| 2     | 5.703     | 2868659 | 15679921 | 97.818  |
| Total |           | 2903256 | 16029766 | 100.000 |

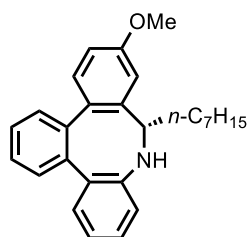

**5af**

**(S)-10-heptyl-12-methoxy-9,10-dihydrotribenzo[b,d,f]azocine 5af**: Yellow oil, actual mass 69.4 mg, 85% yield, (eluent: petroleum ether/ethyl acetate = 10:1).  $[\alpha]_D^{25} = +144.6$  ( $c = 0.2$ ,  $\text{CHCl}_3$ ).

$^1\text{H NMR}$  (600 MHz,  $\text{CDCl}_3$ )  $\delta$  7.45 – 7.37 (m, 2H), 7.30 (d,  $J = 7.4$  Hz, 1H), 7.23 – 7.19 (m, 2H), 6.97 – 6.94 (m, 1H), 6.82 – 6.76 (m, 3H), 6.64 (t,  $J = 7.4$  Hz, 1H), 6.43 (d,  $J = 8.0$  Hz, 1H), 4.49 (t,  $J = 7.3$  Hz, 1H), 3.81 (s, 3H), 3.56 (br, 1H), 1.89 – 1.77 (m, 2H), 1.27 – 1.17 (m, 10H), 0.85 (t,  $J = 7.1$  Hz, 3H).

$^{13}\text{C NMR}$  (151 MHz,  $\text{CDCl}_3$ )  $\delta$  159.5, 146.0, 143.5, 141.0, 141.0, 136.3, 134.0, 131.1, 128.9, 128.7, 128.2, 127.9, 127.9, 127.2, 118.3, 117.9, 111.9, 109.5, 55.3, 55.2, 34.3, 31.7, 29.3, 28.9, 26.5, 22.5, 14.0.

**HRMS** (ESI)  $m/z$ :  $[M + H]^+$  calcd for  $C_{27}H_{32}NO$  386.2478; found 386.2473.

**HPLC** (Daicel CHIRALPAK OD-H, *n*-hexane : isopropanol = 99 : 1, Flow rate = 1.0 mL/min,  $\lambda$  = 220 nm):  $t_R$  = 17.58 min (major enantiomer),  $t_R$  = 6.62 min (minor enantiomer).

<chromatogram>

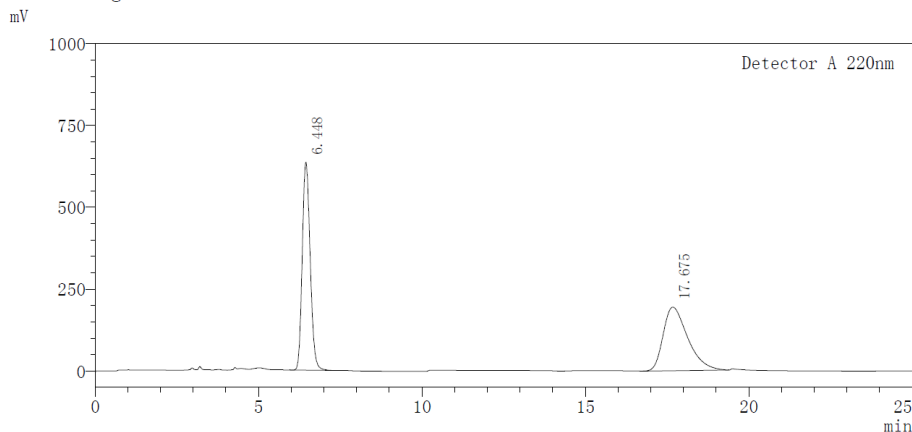

<Peak table>

| Peak# | Ret. Time | Height | Area     | Area%   |
|-------|-----------|--------|----------|---------|
| 1     | 6.448     | 635358 | 10748162 | 51.462  |
| 2     | 17.675    | 194308 | 10137327 | 48.538  |
| Total |           | 829666 | 20885489 | 100.000 |

<chromatogram>

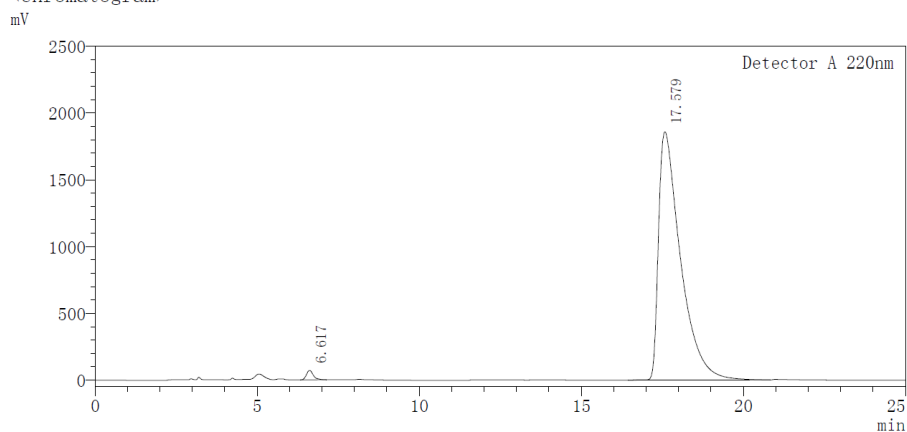

<Peak table>

| Peak# | Ret. Time | Height  | Area     | Area%   |
|-------|-----------|---------|----------|---------|
| 1     | 6.617     | 70788   | 1046159  | 1.179   |
| 2     | 17.579    | 1859089 | 87663712 | 98.821  |
| Total |           | 1929877 | 88709872 | 100.000 |

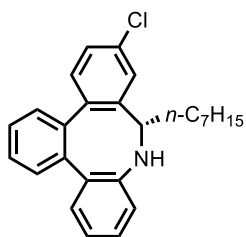

**5ag**

**(S)-12-chloro-10-heptyl-9,10-dihydrotribenzo[b,d,f]azocine 5ag**: Yellow oil, actual mass 59.1 mg, 76% yield, (eluent: petroleum ether/ethyl acetate = 20:1).  $[\alpha]_D^{25} = +89.3$  ( $c = 0.2$ ,  $CHCl_3$ ).

**$^1H$  NMR** (600 MHz,  $CDCl_3$ )  $\delta$  7.46 (td,  $J = 7.5, 1.3$  Hz, 1H), 7.40 (td,  $J = 7.5, 1.3$  Hz, 1H), 7.30 – 7.29 (m, 1H), 7.24 – 7.16 (m, 4H), 6.98 – 6.95 (m, 1H), 6.76 (dd,  $J = 7.6, 1.4$  Hz, 1H), 6.66 – 6.64 (m, 1H), 6.43 (d,  $J = 8.1$  Hz, 1H), 4.47 (t,  $J = 7.1$  Hz, 1H), 3.54 (br, 1H), 1.89 – 1.75 (m, 2H), 1.26 – 1.16 (m, 10H), 0.84 (t,  $J = 7.2$  Hz, 3H).

**$^{13}C$  NMR** (151 MHz,  $CDCl_3$ )  $\delta$  145.7, 143.2, 142.0, 141.6, 140.1, 134.0, 133.8, 131.3, 129.1, 128.7, 128.5, 128.1, 127.8, 127.4, 127.3, 123.9, 118.5, 118.0, 55.1, 34.1, 31.7, 29.2, 28.9, 26.5, 22.5, 14.0.

**HRMS** (ESI)  $m/z$ :  $[M + H]^+$  calcd for  $C_{26}H_{29}ClN$  390.1983; found 390.1991.

**HPLC** (Daicel CHIRALPAK OD-H, *n*-hexane : isopropanol = 99 : 1, Flow rate = 1.0 mL/min,  $\lambda$  = 220 nm):  $t_R$  = 5.41 min (major enantiomer),  $t_R$  = 4.37 min (minor enantiomer).

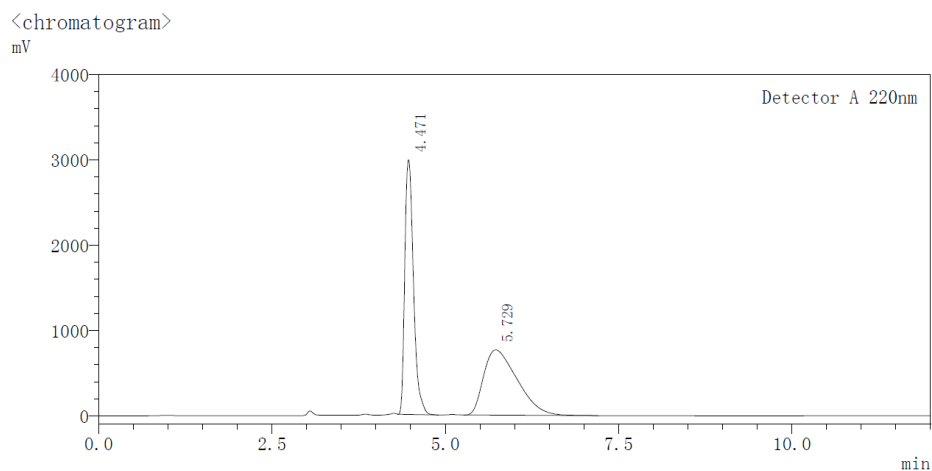

<Peak table>

| Peak# | Ret. Time | Height  | Area     | Area%   |
|-------|-----------|---------|----------|---------|
| 1     | 4.471     | 2983871 | 26087827 | 50.365  |
| 2     | 5.729     | 764734  | 25709381 | 49.635  |
| Total |           | 3748604 | 51797209 | 100.000 |

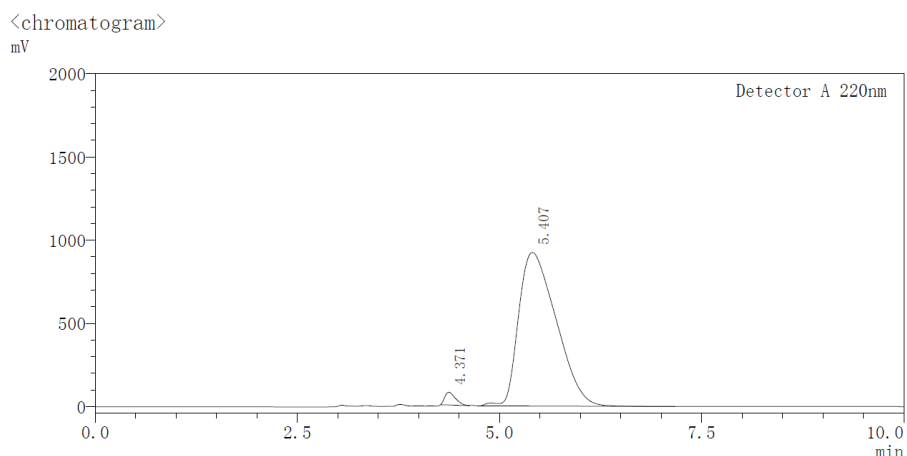

<Peak table>

| Peak# | Ret. Time | Height | Area     | Area%   |
|-------|-----------|--------|----------|---------|
| 1     | 4.371     | 76415  | 700079   | 2.289   |
| 2     | 5.407     | 922673 | 29887755 | 97.711  |
| Total |           | 999089 | 30587834 | 100.000 |

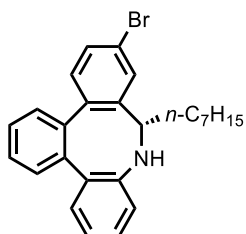

**(S)-12-bromo-10-heptyl-9,10-dihydrotribenzo[b,d,f]azocine 5ah**: Yellow oil, actual mass 53.7 mg, 62% yield, (eluent: petroleum ether/ethyl acetate = 20:1).  $[\alpha]_D^{25} = +66.3$  ( $c = 0.2$ ,  $CHCl_3$ ).

$^1H$  NMR (600 MHz,  $CDCl_3$ )  $\delta$  7.48 – 7.45 (m, 1H), 7.42 – 7.36 (m, 3H), 7.30 (d,  $J = 7.3$  Hz, 1H), 7.18 – 7.16 (d,  $J = 8.1$  Hz, 2H), 6.99 – 6.96 (m, 1H), 6.78 – 6.76 (m, 1H), 6.66 (t,  $J = 7.4$  Hz, 1H), 6.44 (d,  $J = 8.0$  Hz, 1H), 4.48 (t,  $J = 6.9$  Hz, 1H), 3.55 (br, 1H), 1.88 – 1.76 (m, 2H), 1.27 – 1.18 (m, 10H), 0.85 (t,  $J = 7.1$  Hz, 3H).

$^{13}C$  NMR (151 MHz,  $CDCl_3$ )  $\delta$  145.6, 143.1, 142.4, 141.9, 140.1, 134.0, 131.3, 130.3, 129.5, 128.6, 128.5, 128.1, 127.8, 127.3, 126.8, 122.1, 118.5, 118.0, 55.0, 34.1, 31.7, 29.2, 28.9, 26.4, 22.5, 14.1.

**HRMS** (ESI)  $m/z$ :  $[M + H]^+$  calcd for  $C_{26}H_{29}BrN$  434.1478; found 434.1480.

**HPLC** (Daicel CHIRALPAK OD-H, *n*-hexane : isopropanol = 99 : 1, Flow rate = 1.0 mL/min,  $\lambda$  = 220 nm):  $t_R$  = 13.37 min (major enantiomer),  $t_R$  = 4.76 min (minor enantiomer).

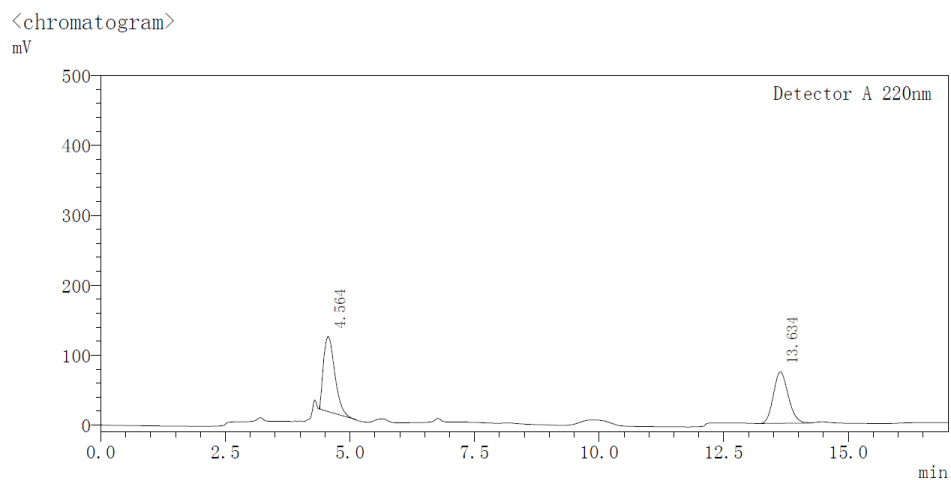

<Peak table>

| Peak# | Ret. Time | Height | Area    | Area%   |
|-------|-----------|--------|---------|---------|
| 1     | 4.564     | 107270 | 1692843 | 52.751  |
| 2     | 13.634    | 73392  | 1516283 | 47.249  |
| Total |           | 180662 | 3209126 | 100.000 |

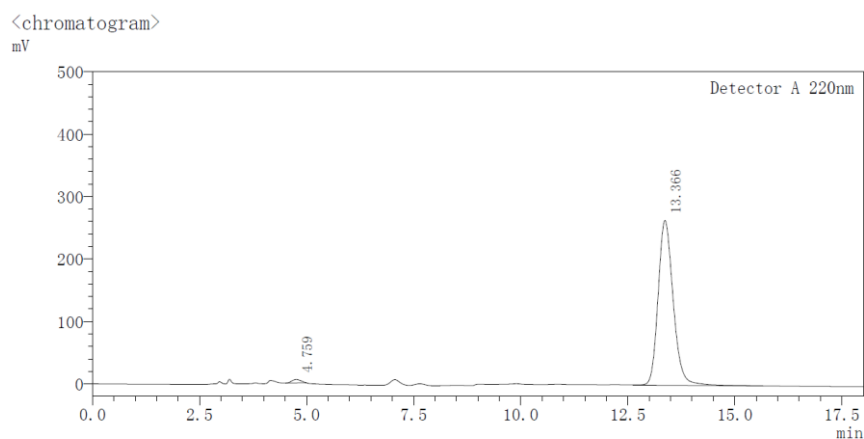

<Peak table>

| Peak# | Ret. Time | Height | Area    | Area%   |
|-------|-----------|--------|---------|---------|
| 1     | 4.759     | 5349   | 81369   | 1.242   |
| 2     | 13.366    | 263997 | 6468532 | 98.758  |
| Total |           | 269347 | 6549901 | 100.000 |

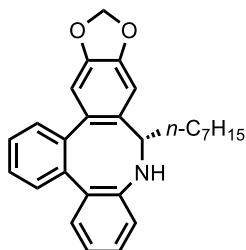

**5ai**

**(S)-10-heptyl-9,10-dihydro-[1,3]dioxolo[4',5':4,5]benzo[1,2-f]benzo[b]benzo[d]azocine 5ai**: Yellow oil, actual mass 64.7 mg, 81% yield, (eluent: petroleum ether/ethyl acetate = 10:1).  $[\alpha]_D^{25} = +159.3$  ( $c = 0.2$ ,  $CHCl_3$ ).

$^1H$  NMR (600 MHz,  $CDCl_3$ )  $\delta$  7.44 – 7.37 (m, 2H), 7.27 (dd,  $J = 7.5, 1.1$  Hz, 1H), 7.19 (dd,  $J = 7.4, 1.1$  Hz, 1H), 6.99 – 6.96 (m, 1H), 6.78 – 6.74 (m, 3H), 6.65 (t,  $J = 7.4$  Hz, 1H), 6.43 (d,  $J = 8.0$  Hz, 1H), 5.95 – 5.88 (m, 2H), 4.43 (t,  $J = 7.3$  Hz, 1H), 3.54 (br, 1H), 1.85 – 1.70 (m, 2H), 1.24 – 1.16 (m, 10H), 0.85 (t,  $J = 7.2$  Hz, 3H).

$^{13}\text{C}$  NMR (151 MHz,  $\text{CDCl}_3$ )  $\delta$  147.6, 146.3, 146.1, 143.3, 141.2, 137.2, 133.8, 133.1, 131.2, 128.7, 128.3, 128.0, 128.0, 127.2, 118.3, 117.8, 108.0, 103.7, 100.9, 55.1, 34.4, 31.7, 29.2, 29.0, 26.5, 22.5, 14.0.

HRMS (ESI)  $m/z$ :  $[\text{M} + \text{H}]^+$  calcd for  $\text{C}_{27}\text{H}_{30}\text{NO}_2$  400.2271; found 400.2265.

HPLC (Daicel CHIRALPAK OD-H, *n*-hexane : isopropanol = 99 : 1, Flow rate = 1.0 mL/min,  $\lambda$  = 220 nm):  $t_R$  = 24.62 min (major enantiomer),  $t_R$  = 8.71 min (minor enantiomer).

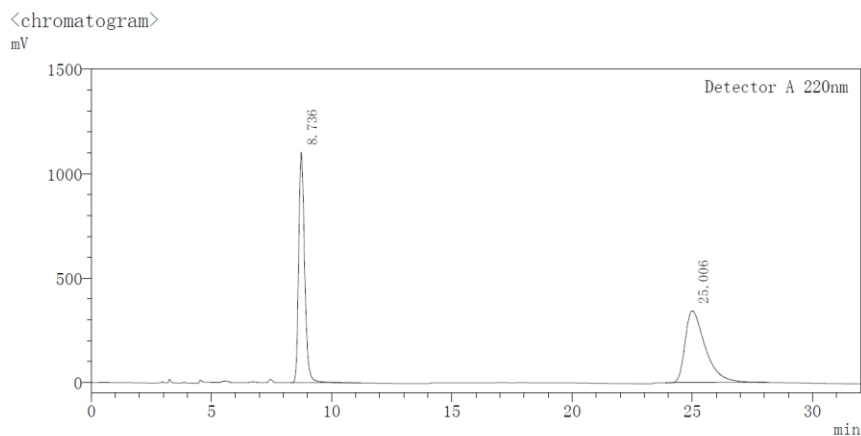

<Peak table>

| Peak# | Ret. Time | Height  | Area     | Area%   |
|-------|-----------|---------|----------|---------|
| 1     | 8.736     | 1102157 | 19009650 | 48.920  |
| 2     | 25.006    | 343249  | 19848958 | 51.080  |
| Total |           | 1445406 | 38858607 | 100.000 |

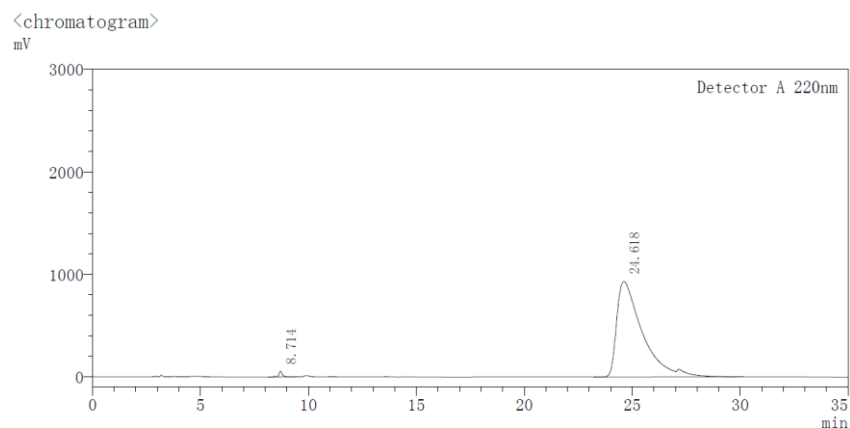

<Peak table>

| Peak# | Ret. Time | Height | Area     | Area%   |
|-------|-----------|--------|----------|---------|
| 1     | 8.714     | 56838  | 686233   | 0.881   |
| 2     | 24.618    | 932581 | 77217632 | 99.119  |
| Total |           | 989419 | 77903865 | 100.000 |

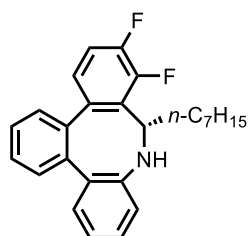

(*S*)-11,12-difluoro-10-heptyl-9,10-dihydrotribenzo[*b,d,f*]azocine **5aj**: Yellow oil, actual mass 62.6 mg, 80% yield, (eluent: petroleum ether/ethyl acetate = 20:1).  $[\alpha]_D^{25} = +125.3$  ( $c = 0.2$ ,  $\text{CHCl}_3$ ).

$^1\text{H}$  NMR (600 MHz,  $\text{CDCl}_3$ )  $\delta$  7.48 – 7.39 (m, 2H), 7.29 (d,  $J = 7.5$  Hz, 1H), 7.21 (d,  $J = 7.4$  Hz, 1H), 7.07 – 6.99 (m, 3H), 6.76 (d,  $J = 7.6$  Hz, 1H), 6.67 (t,  $J = 7.4$  Hz, 1H), 6.53 (d,  $J = 8.1$  Hz, 1H), 4.61 (d,  $J = 6.8$  Hz, 1H), 3.84 (d,  $J = 7.4$  Hz, 1H), 2.12 – 1.97 (m, 2H), 1.22 – 1.15 (m, 10H), 0.84 (t,  $J = 7.1$  Hz, 3H).

$^{13}\text{C}$  NMR (151 MHz,  $\text{CDCl}_3$ )  $\delta$  150.1 (dd,  $J_{\text{C-F}} = 223.4, 13.8$  Hz), 148.5 (dd,  $J_{\text{C-F}} = 225.4, 13.1$  Hz), 146.0, 143.4, 140.7 – 140.6 (m), 139.9, 134.1, 131.5, 128.7, 128.7 (d,  $J = 9.6$  Hz), 128.5, 128.2, 127.7, 127.4, 123.3 (dd,  $J = 6.0, 3.4$  Hz), 118.75, 117.92, 115.9 (d,  $J = 17.3$  Hz), 56.12, 33.6 (d,  $J = 8.0$  Hz), 31.69, 29.08, 28.91, 26.91, 22.51, 14.04.

HRMS (ESI)  $m/z$ :  $[\text{M} + \text{H}]^+$  calcd for  $\text{C}_{26}\text{H}_{28}\text{F}_2\text{N}$  392.2184; found 392.2188.

HPLC (Daicel CHIRALPAK OD-H, *n*-hexane : isopropanol = 99 : 1, Flow rate = 1.0 mL/min,  $\lambda = 220$  nm):  $t_{\text{R}} = 7.52$  min (major enantiomer),  $t_{\text{R}} = 4.80$  min (minor enantiomer).

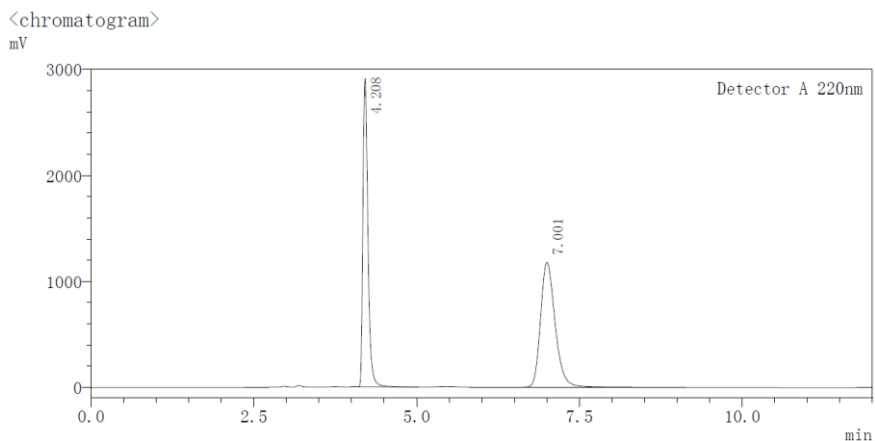

<Peak table>

| Peak# | Ret. Time | Height  | Area     | Area%   |
|-------|-----------|---------|----------|---------|
| 1     | 4.208     | 2910938 | 15681472 | 45.980  |
| 2     | 7.001     | 1179531 | 18423780 | 54.020  |
| Total |           | 4090469 | 34105253 | 100.000 |

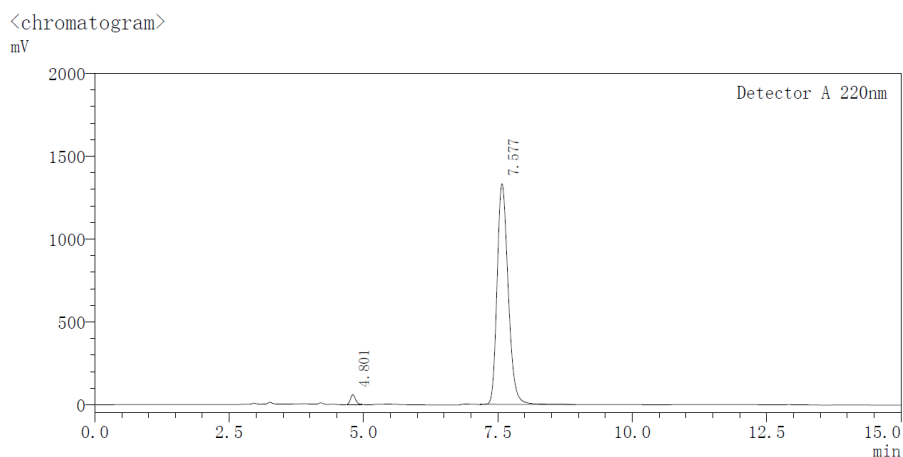

<Peak table>

| Peak# | Ret. Time | Height  | Area     | Area%   |
|-------|-----------|---------|----------|---------|
| 1     | 4.801     | 58793   | 380038   | 1.945   |
| 2     | 7.577     | 1332879 | 19162925 | 98.055  |
| Total |           | 1391672 | 19542963 | 100.000 |

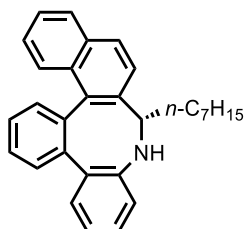

**5ak**

(*S*)-7-heptyl-7,8-dihydrodibenzo[*b,d*]naphtho[1,2-*f*]azocine **5ak**: Yellow oil, actual mass 69.7 mg, 86% yield, (eluent: petroleum ether/ethyl acetate = 20:1).  $[\alpha]_{\text{D}}^{25} = +105.5$  ( $c = 0.2, \text{CHCl}_3$ ).

$^1\text{H}$  NMR (600 MHz,  $\text{CDCl}_3$ )  $\delta$  7.84 – 7.78 (m, 3H), 7.54 – 7.30 (m, 7H), 6.89 – 6.81 (m, 2H), 6.55 (t,  $J = 7.4$  Hz, 1H), 6.37 (d,  $J = 8.1$  Hz, 1H), 4.63 (t,  $J = 7.3$  Hz, 1H), 3.59 (br, 1H), 1.97 – 1.93 (m, 2H), 1.27 – 1.17 (m, 10H), 0.84 (t,  $J = 7.1$  Hz, 3H).

$^{13}\text{C}$  NMR (151 MHz,  $\text{CDCl}_3$ )  $\delta$  145.9, 144.2, 139.6, 138.4, 135.8, 133.1, 132.9, 131.6, 131.2, 130.4, 128.6, 128.4, 128.3, 127.9, 127.9, 126.7, 126.4, 126.0, 125.4, 121.3, 118.3, 117.8, 55.9, 33.9, 31.7, 29.2, 29.0, 26.5, 22.5, 14.0.

HRMS (ESI)  $m/z$ :  $[\text{M} + \text{H}]^+$  calcd for  $\text{C}_{30}\text{H}_{32}\text{N}$  406.2529; found 406.2529.

HPLC (Daicel CHIRALPAK OD-H, *n*-hexane : isopropanol = 99 : 1, Flow rate = 1.0 mL/min,  $\lambda$  = 220 nm):  $t_R$  = 17.27 min (major enantiomer),  $t_R$  = 5.52 min (minor enantiomer).

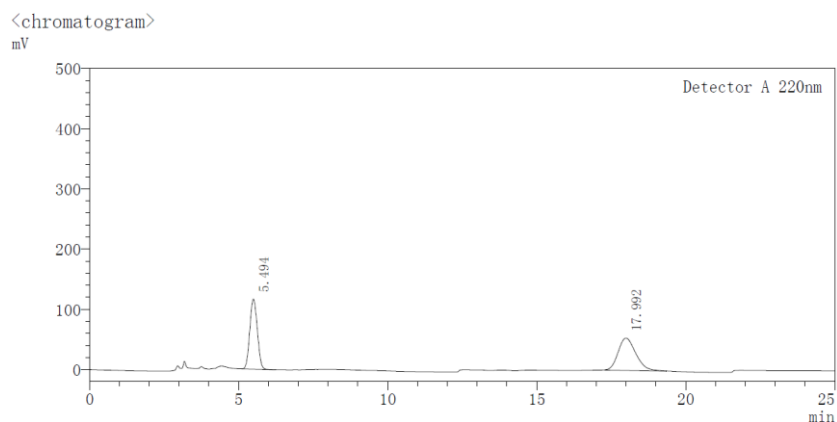

<Peak table>

| Peak# | Ret. Time | Height | Area    | Area%   |
|-------|-----------|--------|---------|---------|
| 1     | 5.494     | 116552 | 2057237 | 48.060  |
| 2     | 17.992    | 53802  | 2223311 | 51.940  |
| Total |           | 170354 | 4280548 | 100.000 |

<chromatogram>

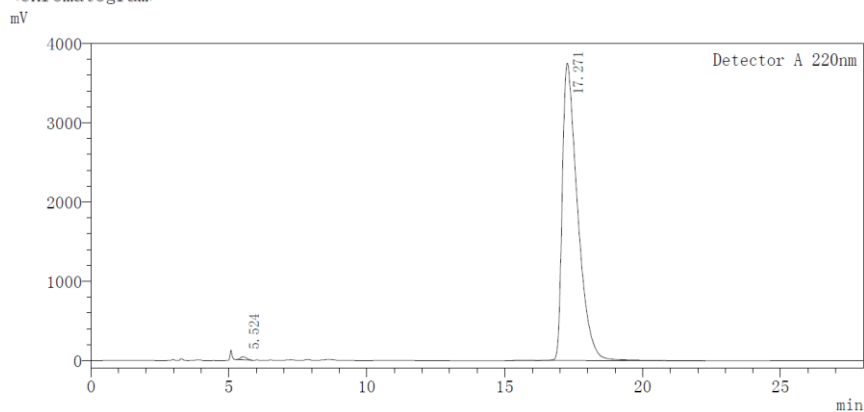

<Peak table>

| Peak# | Ret. Time | Height  | Area      | Area%   |
|-------|-----------|---------|-----------|---------|
| 1     | 5.524     | 39059   | 612140    | 0.421   |
| 2     | 17.271    | 3752566 | 144665792 | 99.579  |
| Total |           | 3791626 | 145277932 | 100.000 |

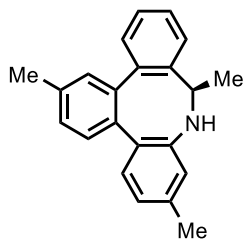

(*R*)-2,7,10-trimethyl-9,10-dihydrotribenzo[*b,d,f*]azocine **5ba**: Yellow oil, actual mass 34.7 mg, 58% yield, (eluent: petroleum ether/ethyl acetate = 20:1).  $[\alpha]_D^{25} = -188.5$  ( $c = 0.2$ ,  $\text{CHCl}_3$ ).

$^1\text{H}$  NMR (600 MHz,  $\text{CDCl}_3$ )  $\delta$  7.26 – 7.15 (m, 5H), 7.10 (d,  $J = 7.7$  Hz, 1H), 6.96 (s, 1H), 6.58 (d,  $J = 7.7$  Hz, 1H), 6.38 – 6.36 (m, 1H), 6.15 (s, 1H), 4.64 (q,  $J = 6.7$  Hz, 1H), 3.44 (br, 1H), 2.34 (s, 3H), 2.06 (s, 3H), 1.39 (d,  $J = 6.7$  Hz, 3H).

$^{13}\text{C}$  NMR (151 MHz,  $\text{CDCl}_3$ )  $\delta$  145.8, 143.3, 141.1, 140.5, 140.2, 137.5, 136.7, 133.9, 131.1, 129.8, 128.8, 128.0, 127.8, 127.2, 125.4, 123.1, 119.5, 118.4, 50.3, 21.0, 20.8, 20.3.

HRMS (ESI)  $m/z$ :  $[\text{M} + \text{H}]^+$  calcd for  $\text{C}_{22}\text{H}_{22}\text{N}$  300.1747; found 300.1727.

**HPLC** (Daicel CHIRALPAK AD-H, *n*-hexane : isopropanol = 98.5 : 1.5, Flow rate = 1.0 mL/min,  $\lambda = 220$  nm):  $t_R = 19.84$  min (major enantiomer),  $t_R = 10.35$  min (minor enantiomer).

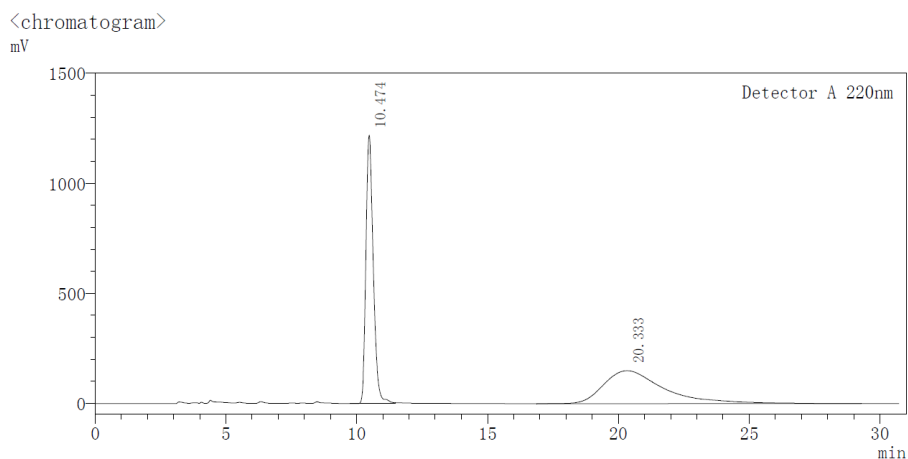

<Peak table>

| Peak# | Ret. Time | Height  | Area     | Area%   |
|-------|-----------|---------|----------|---------|
| 1     | 10.474    | 1215956 | 23586504 | 49.422  |
| 2     | 20.333    | 149628  | 24138363 | 50.578  |
| Total |           | 1365584 | 47724866 | 100.000 |

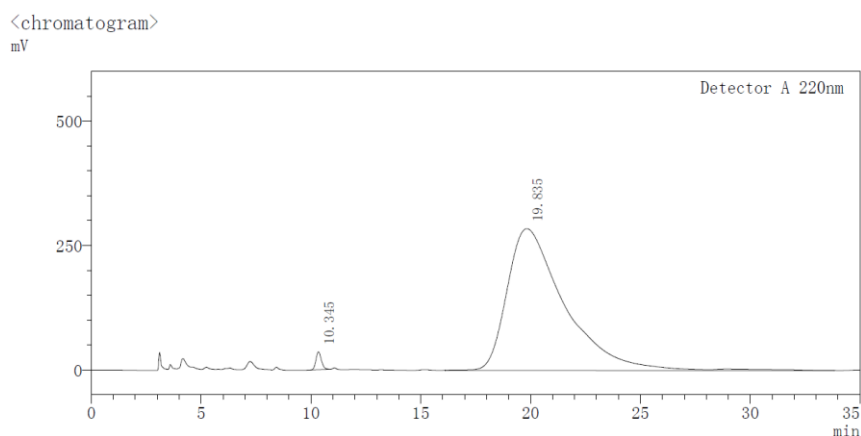

<Peak table>

| Peak# | Ret. Time | Height | Area     | Area%   |
|-------|-----------|--------|----------|---------|
| 1     | 10.345    | 35861  | 625796   | 1.192   |
| 2     | 19.835    | 284826 | 51882992 | 98.808  |
| Total |           | 320686 | 52508788 | 100.000 |

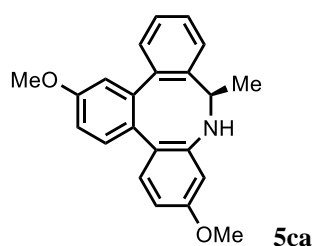

**(R)-2,7-dimethoxy-10-methyl-9,10-dihydrotribenzo[b,d,f]azocine 5ca:** Yellow oil, actual mass 44.4 mg, 67% yield, (eluent: petroleum ether/ethyl acetate = 10:1).  $[\alpha]_D^{25} = -238.4$  ( $c = 0.2$ ,  $\text{CHCl}_3$ ).

**$^1\text{H NMR}$**  (600 MHz,  $\text{CDCl}_3$ )  $\delta$  7.37 – 7.25 (m, 4H), 7.21 (d,  $J = 8.4$  Hz, 1H), 6.99 (dd,  $J = 8.4, 2.7$  Hz, 1H), 6.80 (d,  $J = 2.7$  Hz, 1H), 6.69 (d,  $J = 8.4$  Hz, 1H), 6.24 (dd,  $J = 8.5, 2.5$  Hz, 1H), 5.97 (d,  $J = 2.5$  Hz, 1H), 4.77 (q,  $J = 6.7$  Hz, 1H), 3.87 (s, 3H), 3.68 (s, 3H), 3.61 (br, 1H), 1.50 (d,  $J = 6.7$  Hz, 3H).

**$^{13}\text{C NMR}$**  (151 MHz,  $\text{CDCl}_3$ )  $\delta$  159.2, 158.7, 147.1, 143.0, 142.5, 140.4, 135.3, 135.0, 132.2, 128.2, 127.6, 127.3, 123.2, 121.0, 114.6, 113.3, 104.5, 102.6, 55.3, 54.9, 50.2, 20.3.

**HRMS** (ESI)  $m/z$ :  $[\text{M} + \text{H}]^+$  calcd for  $\text{C}_{22}\text{H}_{22}\text{NO}_2$  332.1645; found 332.1640.



**HPLC** (Daicel CHIRALPAK AD-H, *n*-hexane : isopropanol = 75 : 25, Flow rate = 1.0 mL/min,  $\lambda$  = 220 nm):  $t_R$  = 12.89 min (major enantiomer),  $t_R$  = 40.25 min (minor enantiomer).

<chromatogram>  
mV

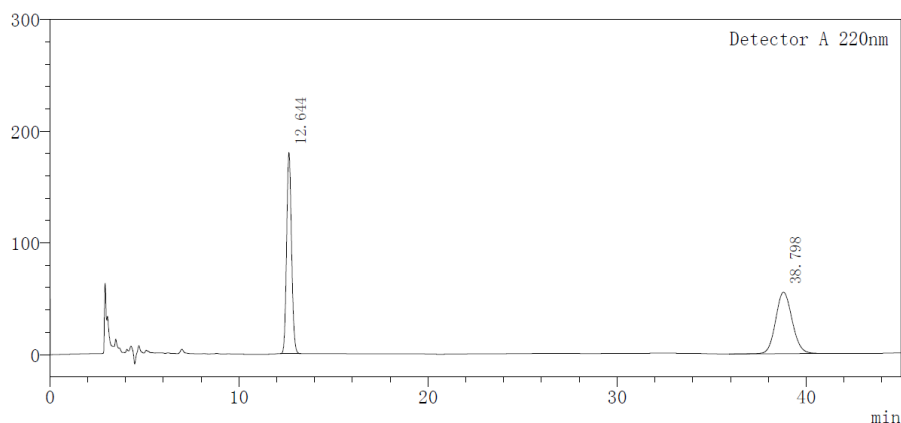

<Peak table>

| Peak# | Ret. Time | Height | Area    | Area%   |
|-------|-----------|--------|---------|---------|
| 1     | 12.644    | 179864 | 3259002 | 49.423  |
| 2     | 38.798    | 55068  | 3335045 | 50.577  |
| Total |           | 234932 | 6594047 | 100.000 |

<chromatogram>  
mV

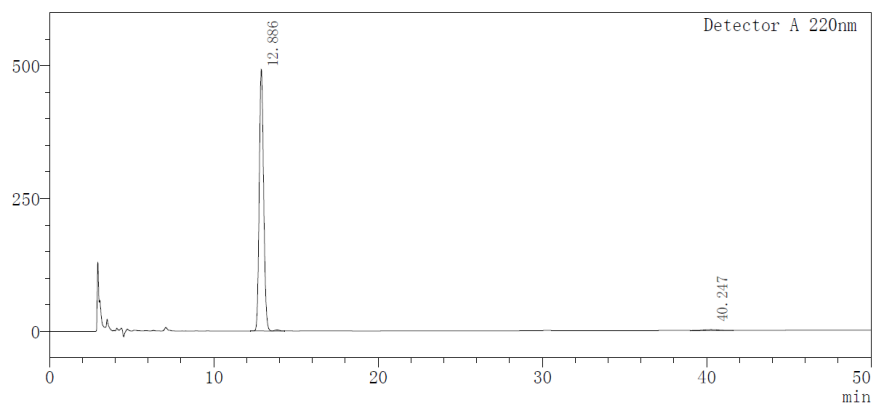

<Peak table>

| Peak# | Ret. Time | Height | Area    | Area%   |
|-------|-----------|--------|---------|---------|
| 1     | 12.886    | 492900 | 9224737 | 98.859  |
| 2     | 40.247    | 1720   | 106424  | 1.141   |
| Total |           | 494620 | 9331161 | 100.000 |

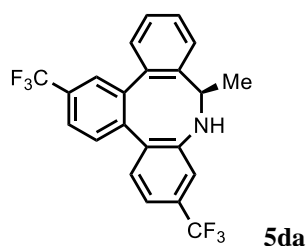

**(R)-10-methyl-2,7-bis(trifluoromethyl)-9,10-dihydrotribenzo[b,d,f]azocine 5da**: Yellow oil, actual mass 40.7 mg, 50% yield, (eluent: petroleum ether/ethyl acetate = 20:1).  $[\alpha]_D^{25} = -162.3$  ( $c = 0.2$ ,  $\text{CHCl}_3$ ).

$^1\text{H NMR}$  (600 MHz,  $\text{CDCl}_3$ )  $\delta$  7.75 – 7.73 (m, 1H), 7.51 (s, 1H), 7.43 – 7.31 (m, 5H), 6.88 – 6.82 (m, 2H), 6.69 (s, 1H), 4.70 – 6.63 (m, 1H), 3.82 (d,  $J = 8.5$  Hz, 1H), 1.53 (d,  $J = 6.7$  Hz, 3H).

$^{13}\text{C NMR}$  (151 MHz,  $\text{CDCl}_3$ )  $\delta$  146.4, 145.6, 142.0, 141.3, 139.4, 134.2, 131.5, 130.7 (q,  $J = 32.3$  Hz), 130.2 (q,  $J = 32.6$  Hz), 129.8, 129.2, 127.92, 127.74, 125.9 (q,  $J = 3.7$  Hz), 125.2 (q,  $J = 3.7$  Hz), 124.1 (q,  $J = 272.4$  Hz), 123.9 (q,  $J = 273.8$  Hz), 123.54, 114.8 – 114.7 (m), 50.4, 20.1.

**HRMS** (ESI)  $m/z$ :  $[\text{M} + \text{H}]^+$  calcd for  $\text{C}_{22}\text{H}_{16}\text{F}_6\text{N}$  408.1181; found 408.1186.

**HPLC** (Daicel CHIRALPAK AD-H, *n*-hexane : isopropanol = 98.5 : 1.5, Flow rate = 1.0 mL/min,  $\lambda$  = 220 nm):  $t_R$  = 4.17 min (major enantiomer),  $t_R$  = 6.47 min (minor enantiomer).

<chromatogram>  
mV

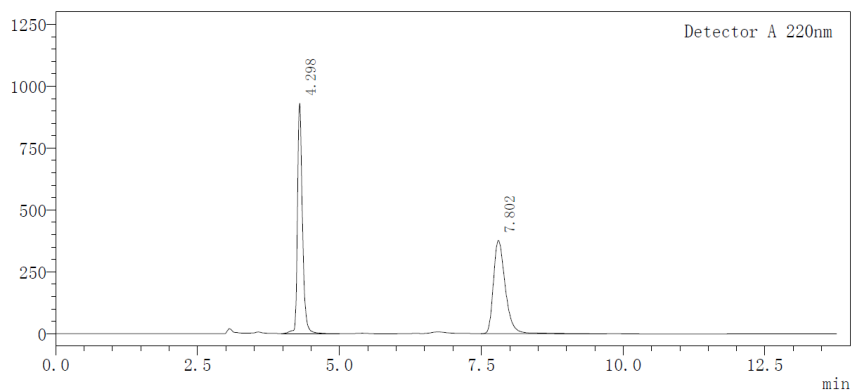

<Peak table>

| Peak# | Ret. Time | Height  | Area     | Area%   |
|-------|-----------|---------|----------|---------|
| 1     | 4.298     | 931003  | 5663955  | 50.798  |
| 2     | 7.802     | 376587  | 5486031  | 49.202  |
| Total |           | 1307590 | 11149985 | 100.000 |

<chromatogram>  
mV

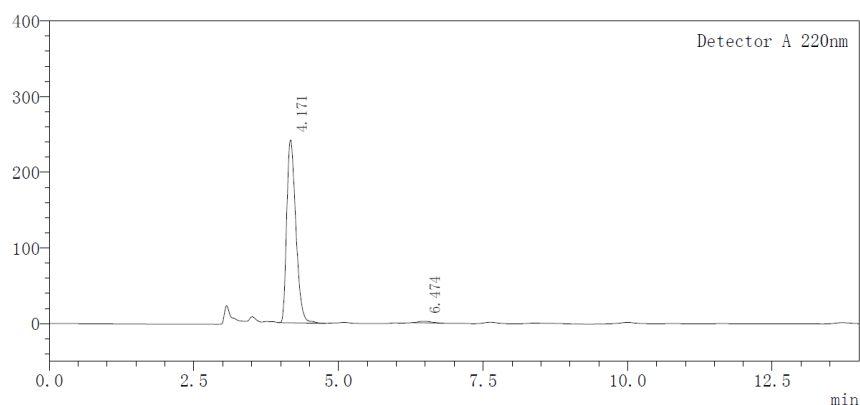

<Peak table>

| Peak# | Ret. Time | Height | Area    | Area%   |
|-------|-----------|--------|---------|---------|
| 1     | 4.171     | 241495 | 2655882 | 98.791  |
| 2     | 6.474     | 2089   | 32503   | 1.209   |
| Total |           | 243584 | 2688385 | 100.000 |

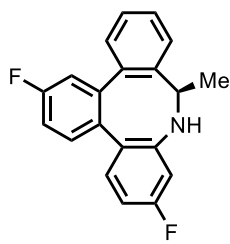

**(R)-2,7-difluoro-10-methyl-9,10-dihydrotribenzo[b,d,f]azocine 5a:** Yellow oil, actual mass 54.0 mg, 88% yield, (eluent: petroleum ether/ethyl acetate = 20:1).  $[\alpha]_D^{25} = -227.5$  ( $c = 0.2$ ,  $\text{CHCl}_3$ ).

$^1\text{H NMR}$  (600 MHz,  $\text{CDCl}_3$ )  $\delta$  7.39 – 7.34 (m, 2H), 7.31 – 7.26 (m, 2H), 7.23 – 7.20 (m, 1H), 7.16 – 7.13 (m, 1H), 6.96 (dd,  $J = 9.1, 2.6$  Hz, 1H), 6.69 – 6.67 (m, 1H), 6.34 (td,  $J = 8.4, 2.5$  Hz, 1H), 6.13 (dd,  $J = 10.8, 2.4$  Hz, 1H), 4.70 (br, 1H), 3.65 (br, 1H), 1.50 (d,  $J = 6.7$  Hz, 3H).

$^{13}\text{C NMR}$  (151 MHz,  $\text{CDCl}_3$ )  $\delta$  162.6 (d,  $J = 244.8$  Hz), 162.3 (d,  $J = 247.1$  Hz), 147.7 (d,  $J = 10.2$  Hz), 143.3 (d,  $J = 7.7$  Hz), 141.9, 139.8, 138.2 (d,  $J = 3.1$  Hz), 135.3 (d,  $J = 9.6$  Hz), 132.6 (d,  $J = 8.2$  Hz), 128.8, 127.6, 127.5, 123.3, 123.3, 116.0 (d,  $J = 21.6$  Hz), 114.8 (d,  $J = 20.8$  Hz), 105.5 (d,  $J = 21.2$  Hz), 104.0 (d,  $J = 24.1$  Hz), 50.3, 20.1.

**HRMS** (ESI)  $m/z$ :  $[M + H]^+$  calcd for  $C_{20}H_{16}F_2N$  308.1245; found 308.1253.

**HPLC** (Daicel CHIRALPAK AD-H, *n*-hexane : isopropanol = 99 : 1, Flow rate = 1.0 mL/min,  $\lambda$  = 220 nm):  $t_R$  = 6.40 min (major enantiomer),  $t_R$  = 7.34 min (minor enantiomer).

<chromatogram>  
mV

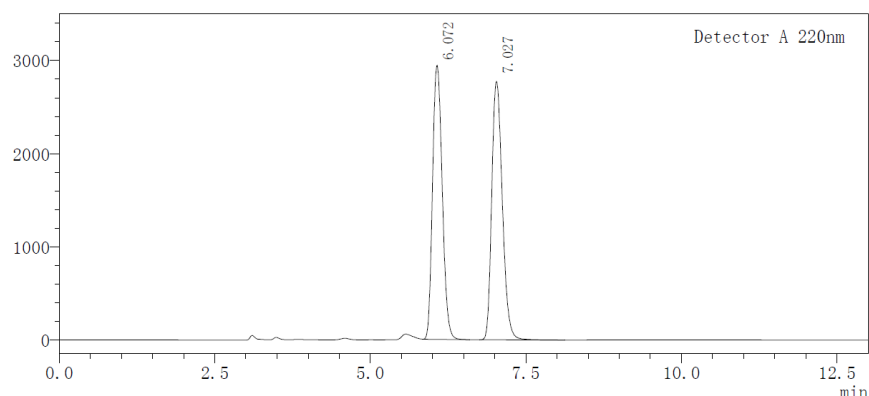

<Peak table>

| Peak# | Ret. Time | Height  | Area     | Area%   |
|-------|-----------|---------|----------|---------|
| 1     | 6.072     | 2942329 | 31916370 | 49.296  |
| 2     | 7.027     | 2775592 | 32828465 | 50.704  |
| Total |           | 5717921 | 64744835 | 100.000 |

<chromatogram>  
mV

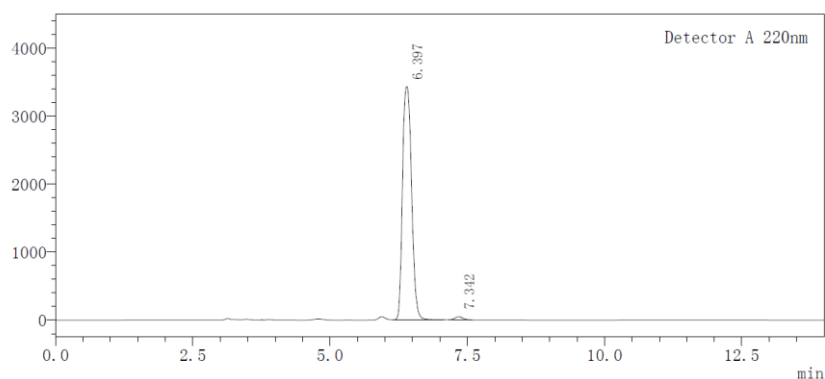

<Peak table>

| Peak# | Ret. Time | Height  | Area     | Area%   |
|-------|-----------|---------|----------|---------|
| 1     | 6.397     | 3431562 | 39223999 | 98.897  |
| 2     | 7.342     | 45750   | 437434   | 1.103   |
| Total |           | 3477312 | 39661434 | 100.000 |

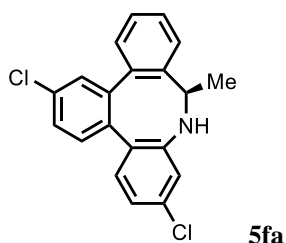

**(R)-2,7-dichloro-10-methyl-9,10-dihydrotribenzo[b,d,f]azocine 5fa**: Yellow oil, actual mass 44.1 mg, 65% yield, (eluent: petroleum ether/ethyl acetate = 20:1).  $[\alpha]_D^{25} = -155.5$  ( $c = 0.2$ ,  $CHCl_3$ ).

$^1H$  NMR (600 MHz,  $CDCl_3$ )  $\delta$  7.34 (dd,  $J = 8.2, 2.2$  Hz, 1H), 7.30 – 7.26 (m, 2H), 7.22 – 7.15 (m, 3H), 7.10 (d,  $J = 8.2$  Hz, 1H), 6.57 – 6.50 (m, 2H), 6.34 (d,  $J = 2.0$  Hz, 1H), 4.60 (br, 1H), 3.55 (br, 1H), 1.41 (d,  $J = 6.7$  Hz, 3H).

$^{13}C$  NMR (151 MHz,  $CDCl_3$ )  $\delta$  147.2, 143.0, 141.5, 140.6, 139.7, 134.8, 133.7, 133.5, 132.3, 129.0, 128.9, 128.3, 127.7, 127.6, 125.5, 123.4, 118.6, 117.4, 50.3, 20.1.

**HRMS** (ESI)  $m/z$ :  $[M + H]^+$  calcd for  $C_{20}H_{16}Cl_2N$  340.0654; found 340.0648.

**HPLC** (Daicel CHIRALPAK AD-H, *n*-hexane : isopropanol = 98.5 : 1.5, Flow rate = 1.0 mL/min,  $\lambda$  = 220 nm):  $t_R$  = 7.32 min (major enantiomer),  $t_R$  = 15.43 min (minor enantiomer).

<chromatogram>  
mV

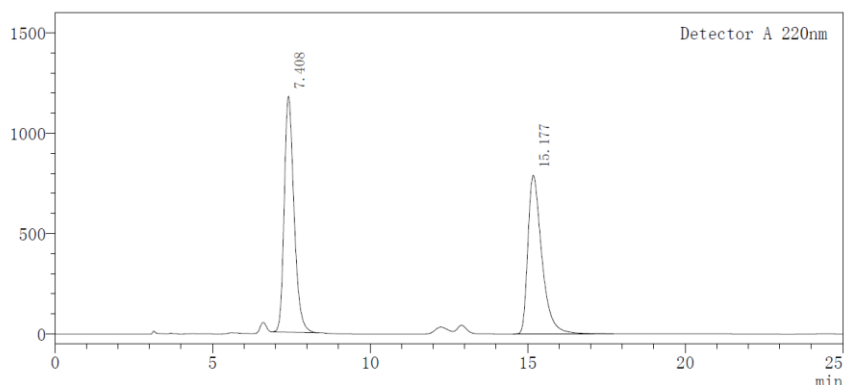

<Peak table>

| Peak# | Ret. Time | Height  | Area     | Area%   |
|-------|-----------|---------|----------|---------|
| 1     | 7.408     | 1174716 | 25517785 | 51.203  |
| 2     | 15.177    | 789614  | 24318254 | 48.797  |
| Total |           | 1964329 | 49836039 | 100.000 |

<chromatogram>  
mV

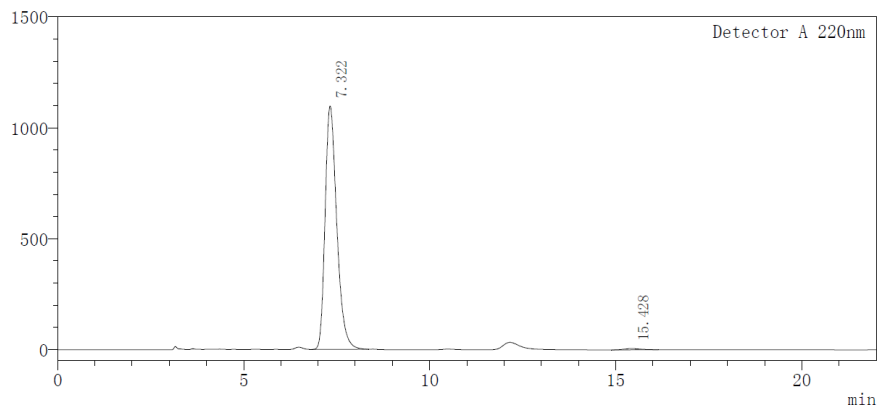

<Peak table>

| Peak# | Ret. Time | Height  | Area     | Area%   |
|-------|-----------|---------|----------|---------|
| 1     | 7.322     | 1096880 | 23928613 | 99.356  |
| 2     | 15.428    | 5196    | 155125   | 0.644   |
| Total |           | 1102076 | 24083739 | 100.000 |

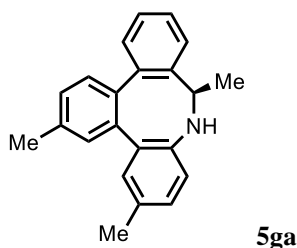

**(R)-3,6,10-trimethyl-9,10-dihydrotribenzo[b,d,f]azocine 5ga:** Yellow oil, actual mass 32.9 mg, 55% yield, (eluent: petroleum ether/ethyl acetate = 20:1).  $[\alpha]_D^{25} = -224.0$  ( $c = 0.2$ ,  $\text{CHCl}_3$ ).

**$^1\text{H}$  NMR** (600 MHz,  $\text{CDCl}_3$ )  $\delta$  7.32 – 7.20 (m, 5H), 7.13 – 7.10 (m, 2H), 6.73 (dd,  $J = 8.1, 2.0$  Hz, 1H), 6.58 (d,  $J = 1.7$  Hz, 1H), 6.32 (d,  $J = 8.1$  Hz, 1H), 4.66 (q,  $J = 6.7$  Hz, 1H), 3.46 (br, 1H), 2.43 (s, 3H), 2.11 (s, 3H), 1.46 (d,  $J = 6.7$  Hz, 3H).

**$^{13}\text{C}$  NMR** (151 MHz,  $\text{CDCl}_3$ )  $\delta$  143.5, 143.1, 143.0, 140.6, 138.4, 137.7, 134.1, 131.8, 128.8, 128.6, 128.4, 128.0, 127.8, 127.4, 127.2, 123.1, 118.0, 50.6, 21.1, 20.3, 20.1.

**HRMS** (ESI)  $m/z$ :  $[\text{M} + \text{Na}]^+$  calcd for  $\text{C}_{22}\text{H}_{22}\text{N}$  300.1747; found 300.1723.

**HPLC** (Daicel CHIRALPAK AD-H, *n*-hexane : isopropanol = 99 : 1, Flow rate = 1.0 mL/min,  $\lambda$  = 220 nm):  $t_R$  = 9.83 min (major enantiomer),  $t_R$  = 11.70 min (minor enantiomer).

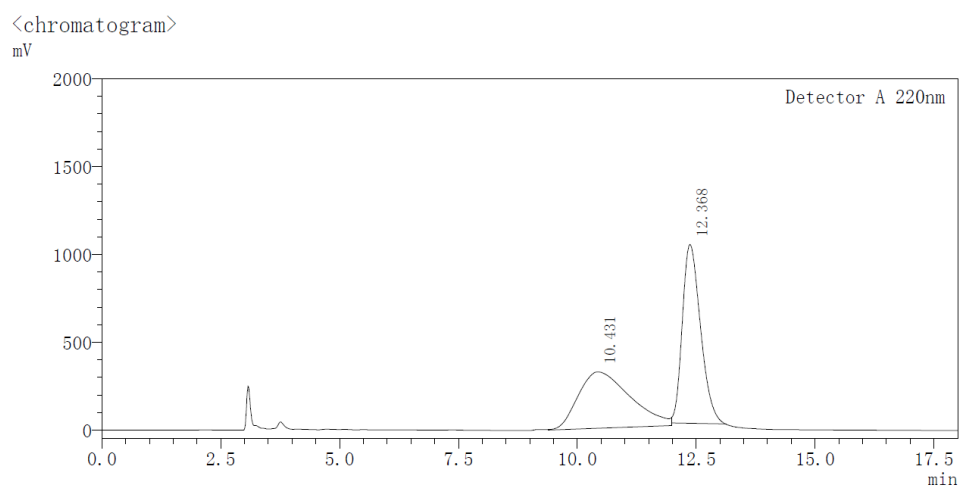

<Peak table>

| Peak# | Ret. Time | Height  | Area     | Area%   |
|-------|-----------|---------|----------|---------|
| 1     | 10.431    | 321821  | 24427004 | 47.355  |
| 2     | 12.368    | 1018275 | 27155966 | 52.645  |
| Total |           | 1340096 | 51582970 | 100.000 |

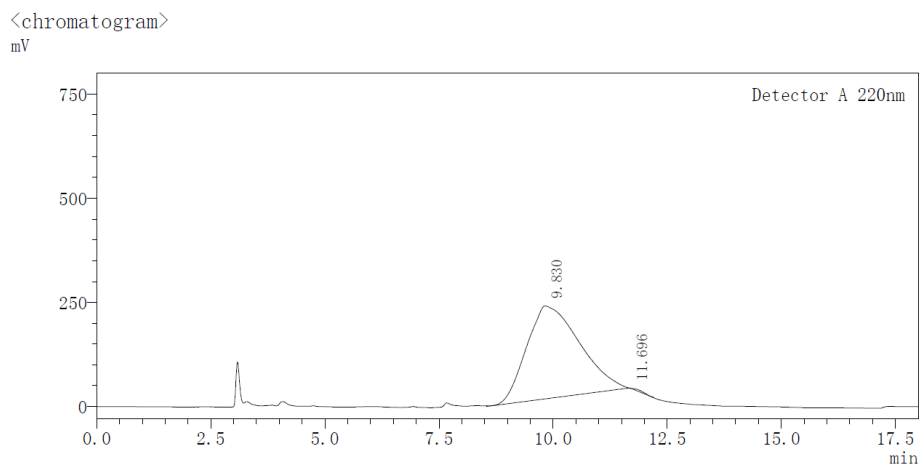

<Peak table>

| Peak# | Ret. Time | Height | Area     | Area%   |
|-------|-----------|--------|----------|---------|
| 1     | 9.830     | 223317 | 17923877 | 99.720  |
| 2     | 11.696    | -107   | 50310    | 0.280   |
| Total |           | 223210 | 17974186 | 100.000 |

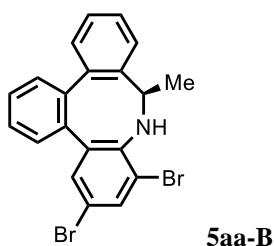

**(R)-6,8-dibromo-10-methyl-9,10-dihydrotribenzo[b,d,f]azocine 5aa-B:** White solid, actual mass 75.1 mg, 88% yield, (eluent: petroleum ether/ethyl acetate = 20:1).  $[\alpha]_D^{25} = -220.6$  ( $c = 0.2$ ,  $\text{CHCl}_3$ ).

$^1\text{H NMR}$  (600 MHz,  $\text{CDCl}_3$ )  $\delta$  7.48 – 7.44 (m, 2H), 7.40 (d,  $J = 2.3$  Hz, 1H), 7.37 – 7.35 (m, 2H), 7.31 – 7.30 (m, 2H), 7.26 – 7.24 (m, 2H), 6.83 (d,  $J = 2.3$  Hz, 1H), 4.69 – 4.64 (m, 1H), 4.49 (d,  $J = 8.1$  Hz, 1H), 1.56 (d,  $J = 6.7$  Hz, 3H).

$^{13}\text{C NMR}$  (151 MHz,  $\text{CDCl}_3$ )  $\delta$  142.8, 142.5, 141.2, 140.9, 139.5, 135.3, 133.5, 131.1, 131.0, 128.9, 128.6, 128.4, 128.1, 127.7, 127.5, 123.4, 112.6, 109.2, 50.7, 20.1.

**HRMS** (ESI)  $m/z$ :  $[\text{M} + \text{H}]^+$  calcd for  $\text{C}_{20}\text{H}_{16}\text{Br}_2\text{N}$  427.9644; found 427.9595.

**HPLC** (Daicel CHIRALPAK OD-H, *n*-hexane : isopropanol = 99.5 : 0.5, Flow rate = 1.0 mL/min,  $\lambda$  = 220 nm):  $t_R$  = 7.42 min (major enantiomer),  $t_R$  = 12.24 min (minor enantiomer).

<chromatogram>  
mV

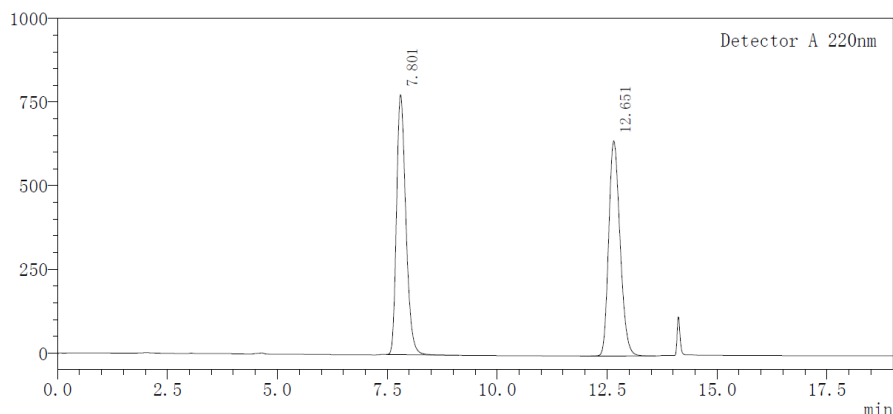

<Peak table>

| Peak# | Ret. Time | Height  | Area     | Area%   |
|-------|-----------|---------|----------|---------|
| 1     | 7.801     | 777292  | 11485796 | 49.826  |
| 2     | 12.651    | 643160  | 11566088 | 50.174  |
| Total |           | 1420452 | 23051884 | 100.000 |

<chromatogram>  
mV

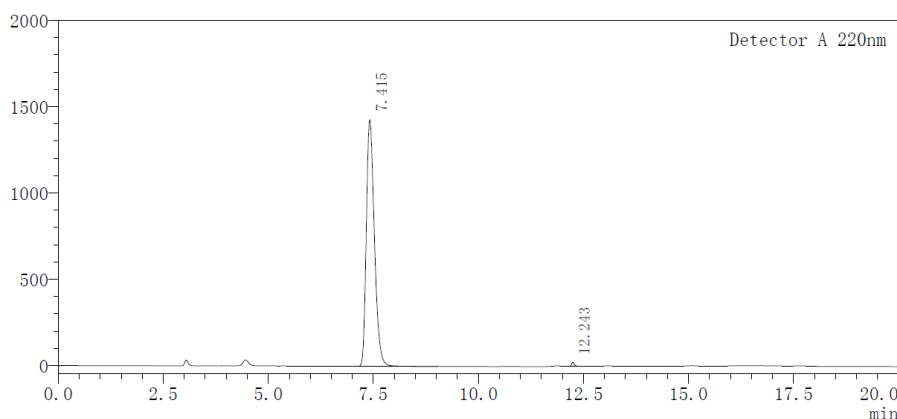

<Peak table>

| Peak# | Ret. Time | Height  | Area     | Area%   |
|-------|-----------|---------|----------|---------|
| 1     | 7.415     | 1429690 | 19131951 | 99.507  |
| 2     | 12.243    | 22166   | 94739    | 0.493   |
| Total |           | 1451856 | 19226689 | 100.000 |

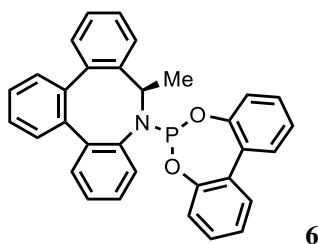

**(R)-9-(dibenzo[d,f][1,3,2]dioxaphosphepin-6-yl)-10-methyl-9,10-dihydrotribenzo[b,d,f]azocine 6:** White solid, actual mass 128.5 mg, 53% yield, (eluent: petroleum ether/ethyl acetate = 20:1).  $[\alpha]_D^{25} = -41.0$  ( $c = 0.2$ ,  $\text{CHCl}_3$ ).

$^1\text{H NMR}$  (600 MHz,  $\text{CDCl}_3$ )  $\delta$  7.57 – 7.52 (m, 2H), 7.45 (dd,  $J = 7.1, 1.5$  Hz, 1H), 7.37 – 7.28 (m, 5H), 7.20 – 7.09 (m, 6H), 7.07 – 7.02 (m, 2H), 7.00 – 6.91 (m, 4H), 5.12 – 5.08 (m, 1H), 1.76 (d,  $J = 6.7$  Hz, 3H).

$^{13}\text{C NMR}$  (151 MHz,  $\text{CDCl}_3$ )  $\delta$  151.3 (d,  $J_{\text{C-P}} = 6.6$ ), 150.8 (d,  $J_{\text{C-P}} = 3.9$ ), 144.3 (d,  $J_{\text{C-P}} = 4.3$ ), 142.7, 142.1, 140.6, 139.6 (d,  $J_{\text{C-P}} = 10.1$ ), 138.3 (d,  $J_{\text{C-P}} = 5.6$ ), 131.3 (d,  $J_{\text{C-P}} = 3.7$ ), 131.1 (d,  $J_{\text{C-P}} = 3.5$ ), 131.1, 130.5 (d,  $J_{\text{C-P}} = 2.9$ ), 129.7 (d,  $J_{\text{C-P}} = 6.4$ ),

128.9 (d,  $J_{C-P} = 4.9$ ), 128.8, 128.3, 128.0, 127.7, 127.6, 127.3 (d,  $J_{C-P} = 2.1$ ), 127.2, 126.7, 126.3, 124.4, 124.1, 122.2 (d,  $J_{C-P} = 12.2$ ), 54.5 (d,  $J_{C-P} = 18.5$ ), 23.3 (d,  $J_{C-P} = 2.5$ ).

$^{31}\text{P}$  NMR (162 MHz,  $\text{CDCl}_3$ )  $\delta$  146.25.

HRMS (ESI)  $m/z$ :  $[\text{M} + \text{Na}]^+$  calcd for  $\text{C}_{32}\text{H}_{24}\text{NNaO}_2\text{P}$  508.1437; found 508.1435.

HPLC (Daicel CHIRALPAK OD-H, *n*-hexane : isopropanol = 99.2 : 0.8, Flow rate = 1.0 mL/min,  $\lambda = 220$  nm):  $t_R = 8.17$  min (major enantiomer),  $t_R = 8.93$  min (minor enantiomer).

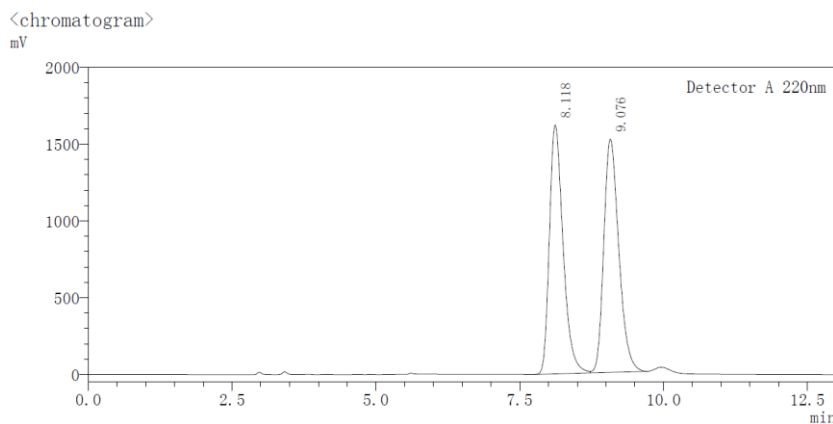

<Peak table>

| Peak# | Ret. Time | Height  | Area     | Area%   |
|-------|-----------|---------|----------|---------|
| 1     | 8.118     | 1621484 | 26846499 | 49.342  |
| 2     | 9.076     | 1519754 | 27563015 | 50.658  |
| Total |           | 3141238 | 54409514 | 100.000 |

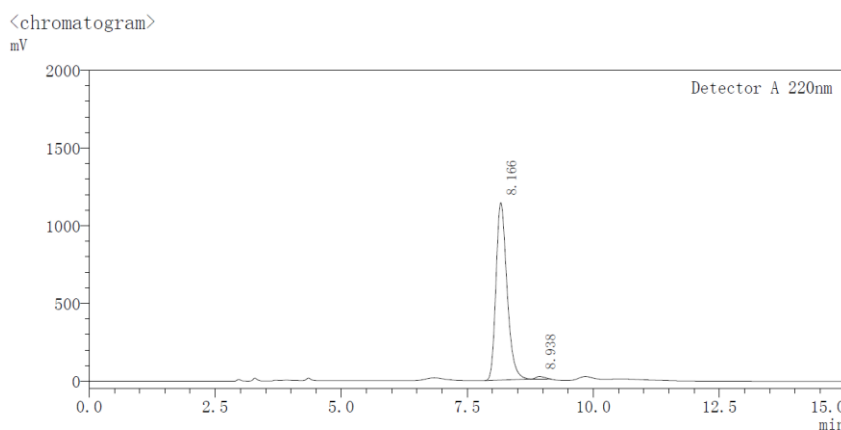

<Peak table>

| Peak# | Ret. Time | Height  | Area     | Area%   |
|-------|-----------|---------|----------|---------|
| 1     | 8.166     | 1142947 | 17416506 | 98.892  |
| 2     | 8.938     | 16623   | 195144   | 1.108   |
| Total |           | 1159570 | 17611651 | 100.000 |

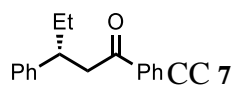

(*S*)-(2-bromophenyl)(cyclopropyl)methanamine **7**: White solid, actual mass 35.6 mg, 75% yield, (eluent: petroleum ether/ethyl acetate = 3:1).  $[\alpha]_D^{25} = -6.3$  ( $c = 0.2$ ,  $\text{CHCl}_3$ ). The specific rotation is opposite to the value of reported.<sup>[7]</sup>

$^1\text{H}$  NMR (600 MHz,  $\text{CDCl}_3$ )  $\delta$  7.92 – 7.90 (m, 2H), 7.55 – 7.42 (m, 3H), 7.30 – 7.18 (m, 5H), 3.30 – 3.24 (m, 3H), 1.82 – 1.77 (m, 1H), 1.68 – 1.63 (m, 1H), 0.81 (t,  $J = 7.4$  Hz, 3H).

HPLC (Daicel CHIRALPAK AD-H, *n*-hexane : isopropanol = 98 : 2, Flow rate = 1.0 mL/min,  $\lambda = 254$  nm):  $t_R = 6.41$  min (major enantiomer),  $t_R = 5.72$  min (minor enantiomer).

<chromatogram>

mV

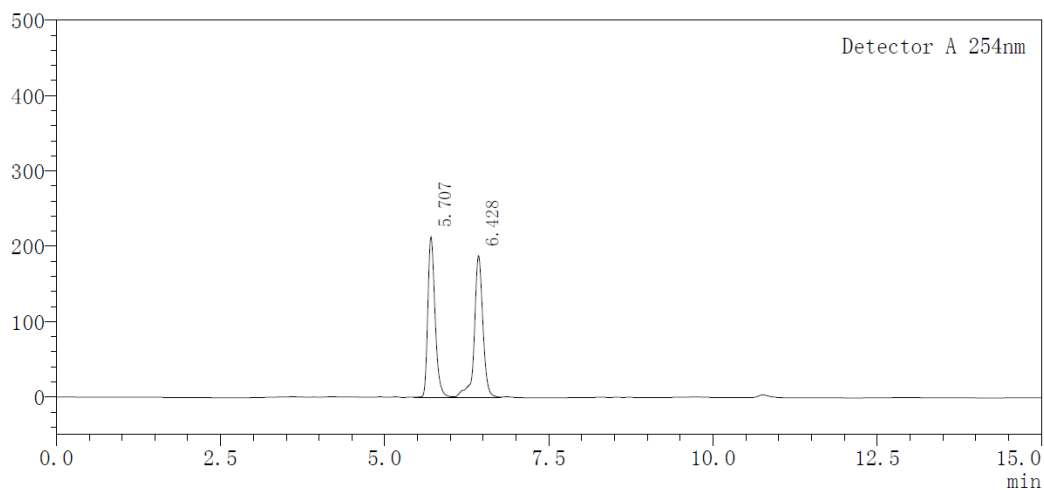

<Peak table>

| Peak# | Ret. Time | Height | Area    | Area%   |
|-------|-----------|--------|---------|---------|
| 1     | 5.707     | 213145 | 1640012 | 48.971  |
| 2     | 6.428     | 187845 | 1708926 | 51.029  |
| Total |           | 400991 | 3348938 | 100.000 |

<chromatogram>

mV

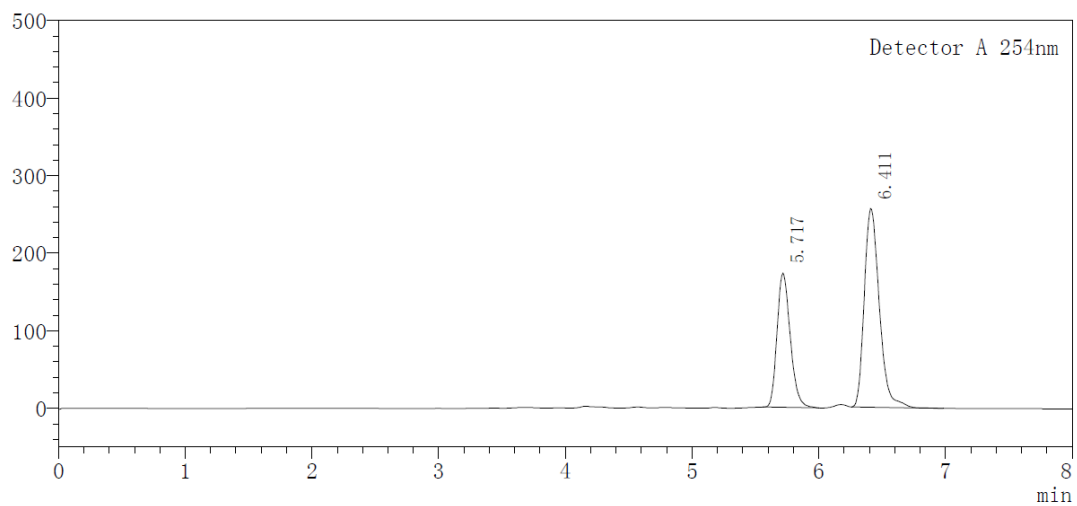

<Peak table>

| Peak# | Ret. Time | Height | Area    | Area%   |
|-------|-----------|--------|---------|---------|
| 1     | 5.717     | 173022 | 1256104 | 37.299  |
| 2     | 6.411     | 256093 | 2111524 | 62.701  |
| Total |           | 429115 | 3367628 | 100.000 |



## 9. Crystal Structure and Corresponding Date of 5aa and 5aa-B

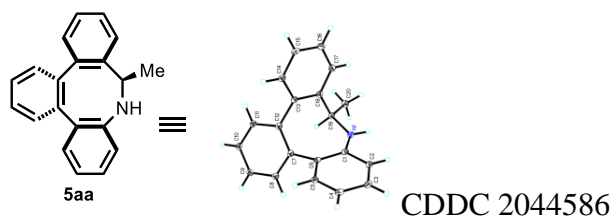

Table 1. Crystal data and structure refinement for **5aa**.

|                                   |                                             |                  |
|-----------------------------------|---------------------------------------------|------------------|
| Identification code               | <b>5aa</b>                                  |                  |
| Empirical formula                 | C <sub>20</sub> H <sub>17</sub> N           |                  |
| Formula weight                    | 271.35                                      |                  |
| Temperature                       | 100(2) K                                    |                  |
| Wavelength                        | 1.54178 Å                                   |                  |
| Crystal system                    | Monoclinic                                  |                  |
| Space group                       | C2                                          |                  |
| Unit cell dimensions              | a = 16.9144(8) Å                            | = 90°.           |
|                                   | b = 7.7719(4) Å                             | = 107.6600(10)°. |
|                                   | c = 22.6944(10) Å                           | = 90°.           |
| Volume                            | 2842.7(2) Å <sup>3</sup>                    |                  |
| Z                                 | 8                                           |                  |
| Density (calculated)              | 1.268 Mg/m <sup>3</sup>                     |                  |
| Absorption coefficient            | 0.558 mm <sup>-1</sup>                      |                  |
| F(000)                            | 1152                                        |                  |
| Crystal size                      | 0.300 x 0.150 x 0.120 mm <sup>3</sup>       |                  |
| Theta range for data collection   | 4.088 to 74.496°.                           |                  |
| Index ranges                      | -20 ≤ h ≤ 20, -9 ≤ k ≤ 9, -28 ≤ l ≤ 28      |                  |
| Reflections collected             | 21990                                       |                  |
| Independent reflections           | 5677 [R(int) = 0.0337]                      |                  |
| Completeness to theta = 67.679°   | 99.6 %                                      |                  |
| Absorption correction             | Semi-empirical from equivalents             |                  |
| Refinement method                 | Full-matrix least-squares on F <sup>2</sup> |                  |
| Data / restraints / parameters    | 5677 / 1 / 381                              |                  |
| Goodness-of-fit on F <sup>2</sup> | 1.035                                       |                  |
| Final R indices [I > 2σ(I)]       | R1 = 0.0383, wR2 = 0.1007                   |                  |
| R indices (all data)              | R1 = 0.0385, wR2 = 0.1009                   |                  |
| Absolute structure parameter      | 0.4(4)                                      |                  |
| Largest diff. peak and hole       | 0.469 and -0.358 e.Å <sup>-3</sup>          |                  |

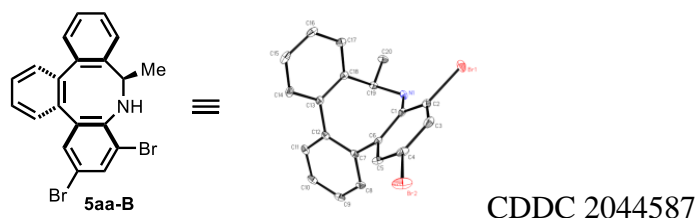

Table 2. Crystal data and structure refinement for **5aa-B**

|                                   |                                                   |        |
|-----------------------------------|---------------------------------------------------|--------|
| Identification code               | <b>5aa-B</b>                                      |        |
| Empirical formula                 | C <sub>20</sub> H <sub>15</sub> Br <sub>2</sub> N |        |
| Formula weight                    | 429.15                                            |        |
| Temperature                       | 101.0 K                                           |        |
| Wavelength                        | 0.71073 Å                                         |        |
| Crystal system                    | Orthorhombic                                      |        |
| Space group                       | P2 <sub>1</sub> 2 <sub>1</sub> 2 <sub>1</sub>     |        |
| Unit cell dimensions              | a = 8.4284(6) Å                                   | = 90°. |
|                                   | b = 11.4357(9) Å                                  | = 90°. |
|                                   | c = 17.5925(13) Å                                 | = 90°. |
| Volume                            | 1695.6(2) Å <sup>3</sup>                          |        |
| Z                                 | 4                                                 |        |
| Density (calculated)              | 1.681 Mg/m <sup>3</sup>                           |        |
| Absorption coefficient            | 4.779 mm <sup>-1</sup>                            |        |
| F(000)                            | 848                                               |        |
| Crystal size                      | 0.29 x 0.1 x 0.05 mm <sup>3</sup>                 |        |
| Theta range for data collection   | 2.680 to 27.481°.                                 |        |
| Index ranges                      | -10 ≤ h ≤ 10, -14 ≤ k ≤ 14, -22 ≤ l ≤ 22          |        |
| Reflections collected             | 20492                                             |        |
| Independent reflections           | 3890 [R(int) = 0.0413]                            |        |
| Completeness to theta = 25.242°   | 99.9 %                                            |        |
| Absorption correction             | Semi-empirical from equivalents                   |        |
| Max. and min. transmission        | 0.7456 and 0.5139                                 |        |
| Refinement method                 | Full-matrix least-squares on F <sup>2</sup>       |        |
| Data / restraints / parameters    | 3890 / 0 / 209                                    |        |
| Goodness-of-fit on F <sup>2</sup> | 1.004                                             |        |
| Final R indices [I > 2σ(I)]       | R1 = 0.0225, wR2 = 0.0480                         |        |
| R indices (all data)              | R1 = 0.0255, wR2 = 0.0490                         |        |
| Absolute structure parameter      | -0.013(5)                                         |        |
| Largest diff. peak and hole       | 0.300 and -0.363 e.Å <sup>-3</sup>                |        |

## 10. References

- [1] H. Jiang, Y. Zhang, D. Chen, B. Zhou and Y. Zhang, *Org. Lett.* 2016, **18**, 2032-2035.
- [2] M. A. Ayedi, Y. L. Bigot, H. Ammar, S. Abid, R. E. Gharbi, M. Delmas, *Synth. Commun.* 2013, **43**, 2127-2133.
- [3] D. M. Schultz and J. P. Wolfe. *Org. Lett.* 2011, **13**, 2962-2965.
- [4] K.-J. Xiao, L. Chu, G. Chen and J.-Q. Yu. *J. Am. Chem. Soc.* 2016, **138**, 7796–7800.
- [5] C. R. Smith and T. V. RajanBabu, *Org. Lett.* 2008, **10**, 1657–1659.
- [6] (a) A. Alexakis, C. Benhaim, S. Rosset and M. Humam, *J. Am. Chem. Soc.* 2002, **124**, 5262–5263; (b) H. Zhou, W.-H. Wang, Y. Fu, J.-H. Xie, W.-J. Shi, L.-X Wang and Q.-L. Zhou, *J. Org. Chem.* 2003, **68**, 1582-1584; (c) H. Yu, F. Xie, Z. Ma, Y. Liu and W. Zhang, *Org. Biomol. Chem.*, 2012, **10**, 5137-5142.
- [7] T. Zhang, J. Jiang, L. Yao, H. Geng and X. Zhang. *Chem. Comm.* 2017, **53**, 9258-9261.

# 11. NMR Spectra

## 11.1 NMR Spectra of the Substrates

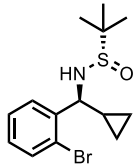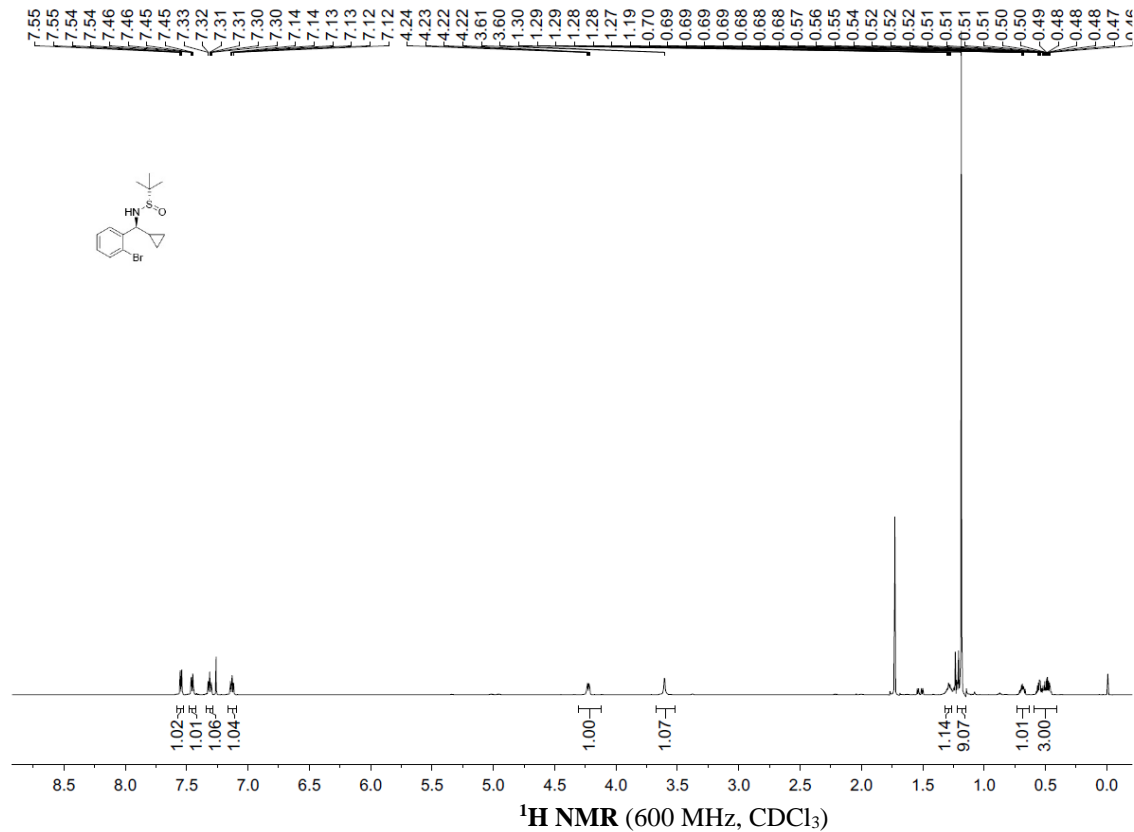

141.01  
132.99  
129.36  
128.88  
127.50  
123.80

62.34  
55.68

22.52  
18.54

5.09  
3.47

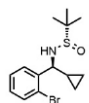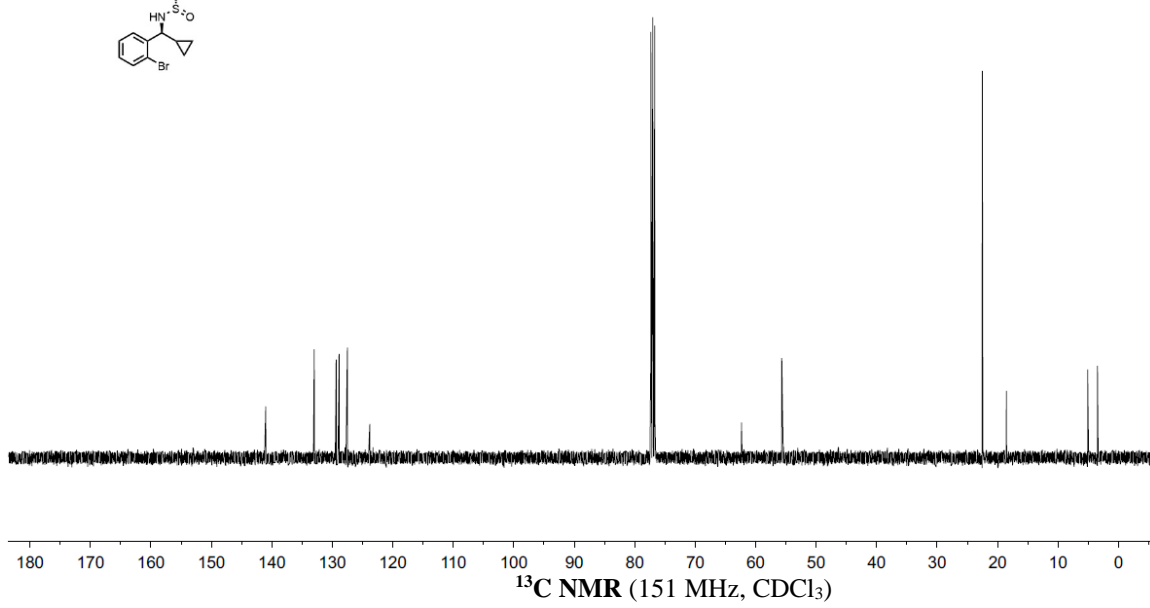

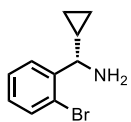

**4b**

7.60  
7.60  
7.58  
7.58  
7.53  
7.53  
7.51  
7.51  
7.34  
7.33  
7.32  
7.32  
7.30  
7.30  
7.11  
7.11  
7.09  
7.09  
7.08  
7.07  
7.07  
3.77  
3.75  
1.22  
1.21  
1.20  
1.19  
1.19  
1.18  
1.16  
1.16  
0.65  
0.65  
0.64  
0.64  
0.63  
0.62  
0.62  
0.61  
0.60  
0.46  
0.46  
0.45  
0.44  
0.44  
0.44  
0.43  
0.43  
0.43  
0.42  
0.42  
0.41  
0.41  
0.38  
0.37  
0.36  
0.36  
0.35  
0.35  
0.34  
0.33

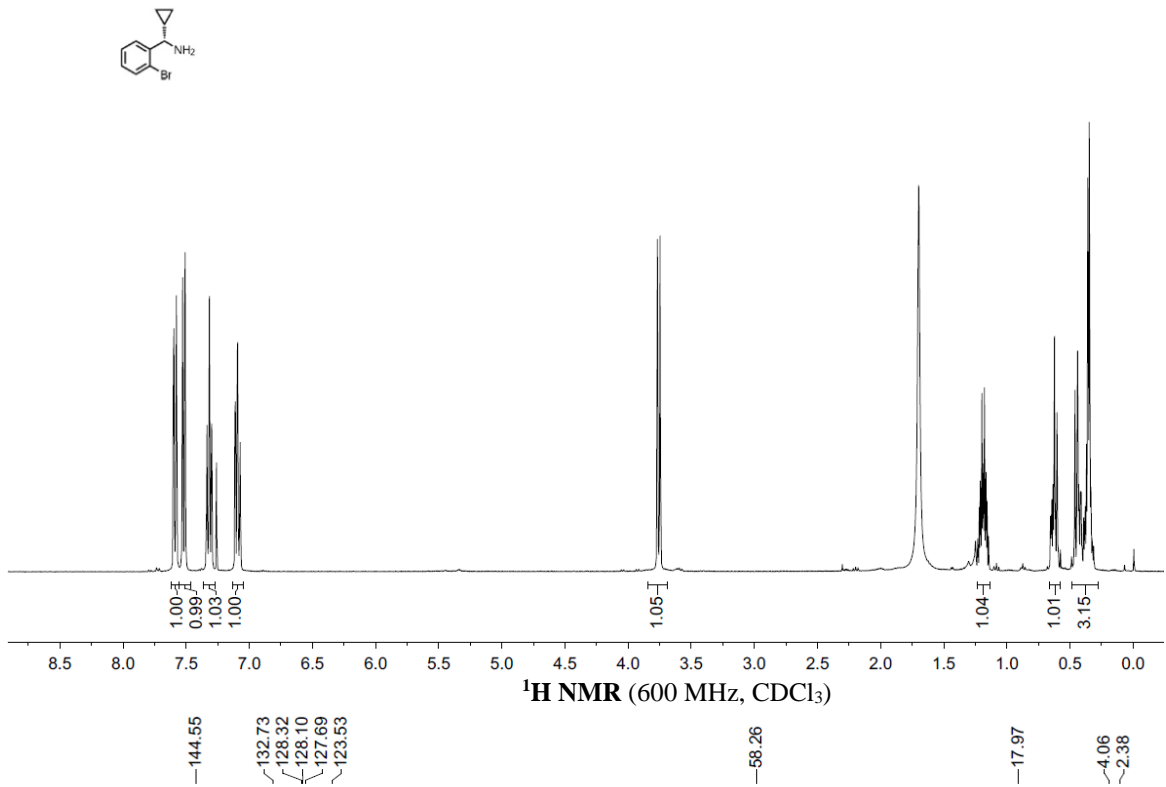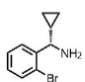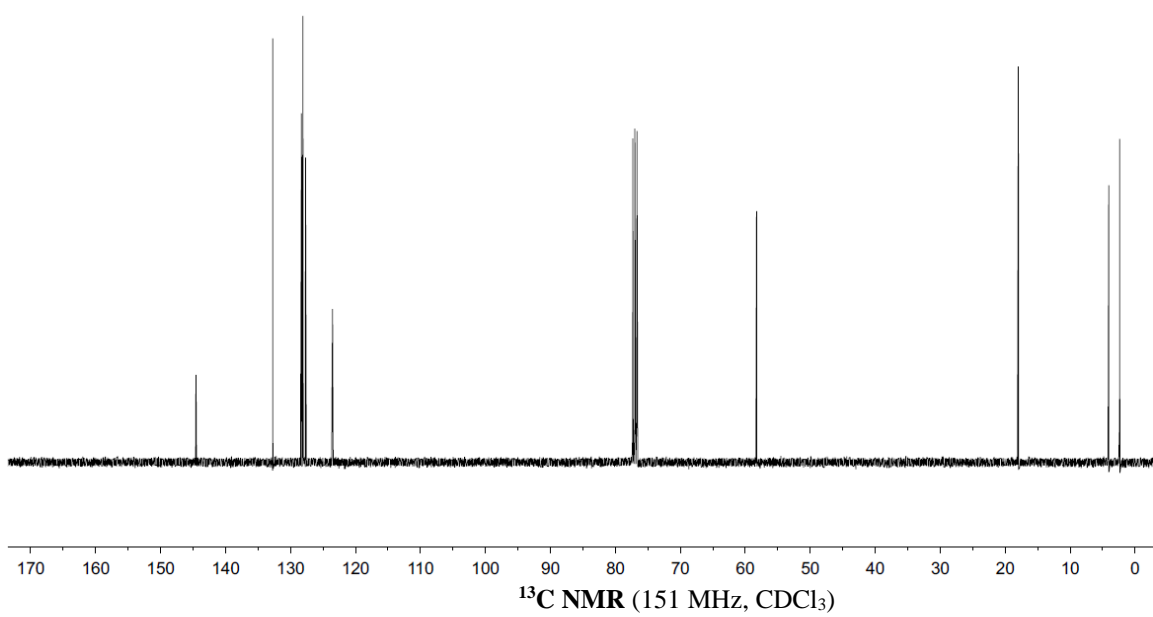

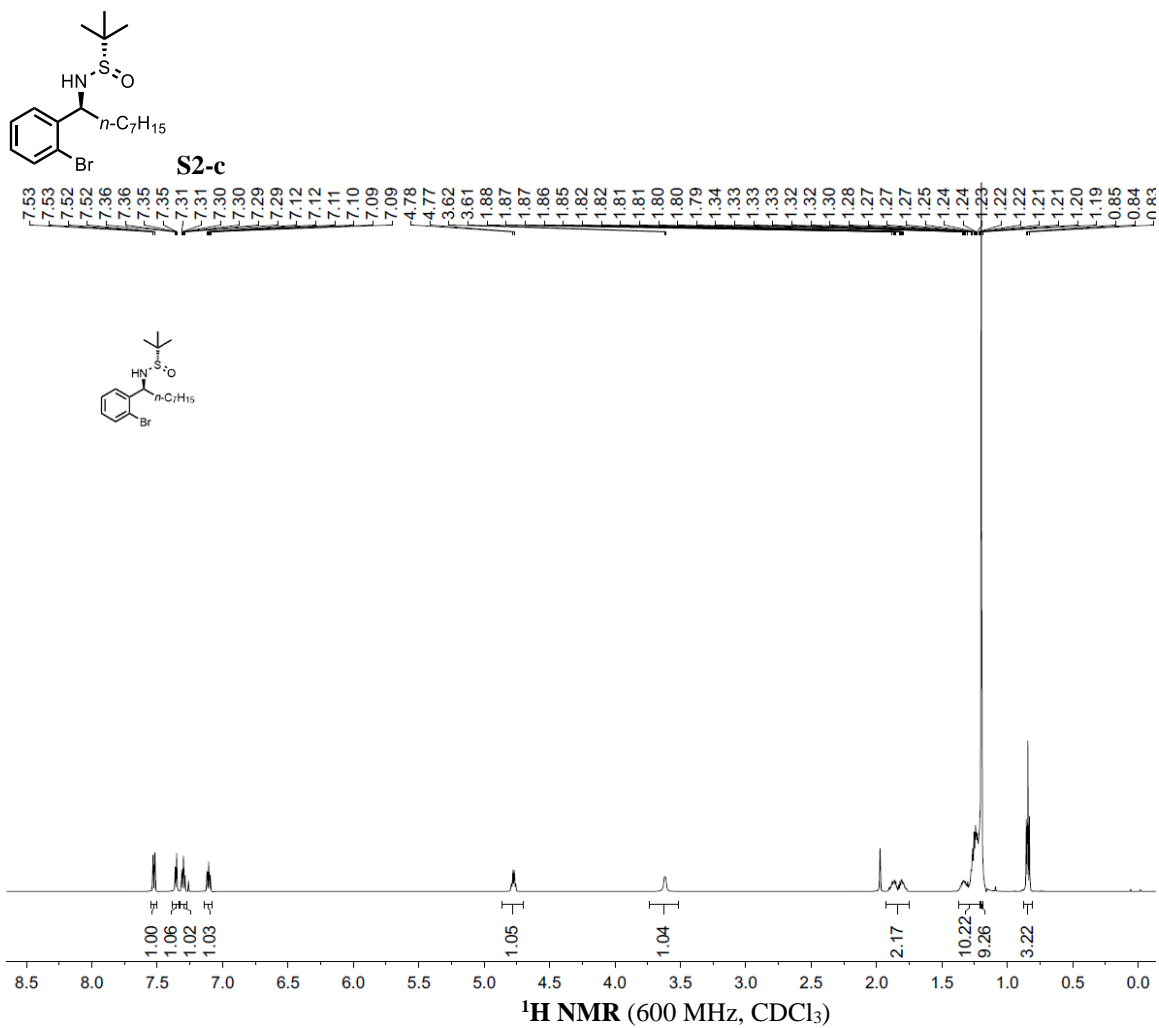

141.72, 133.05, 128.82, 128.30, 127.63, 123.36, 58.29, 55.97, 36.25, 31.67, 29.22, 29.03, 25.47, 22.52, 22.50, 14.00

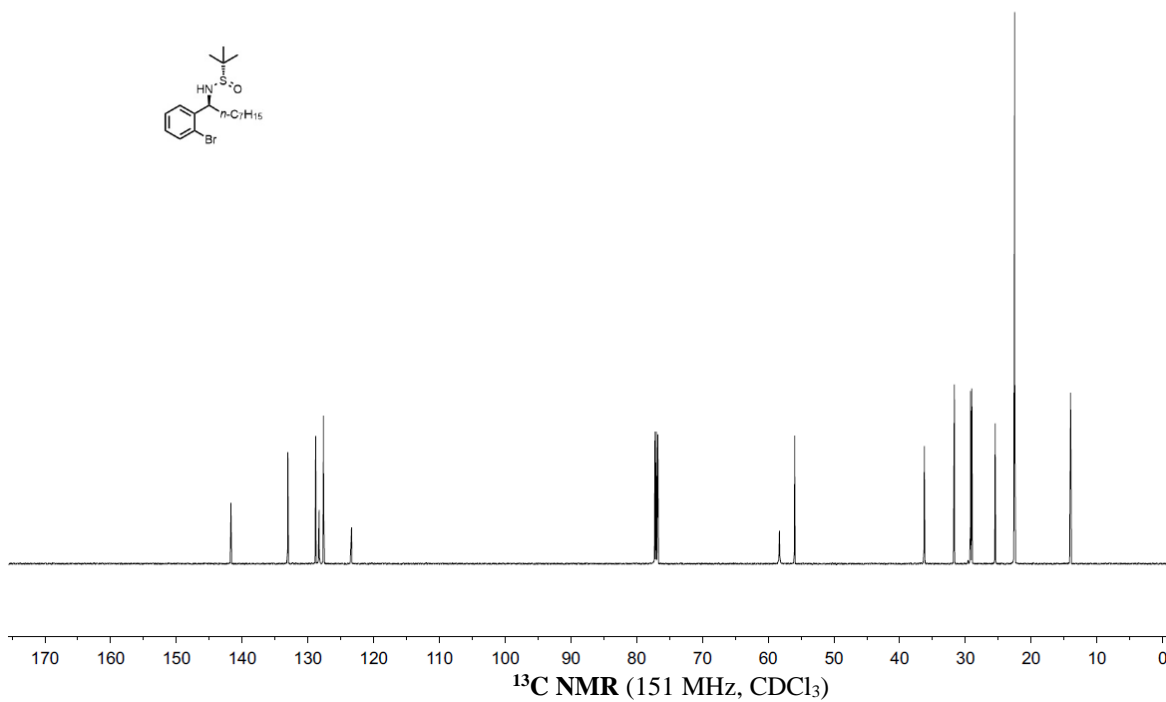

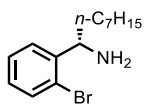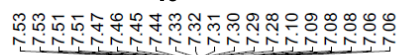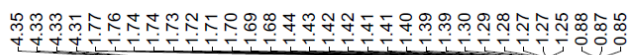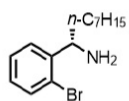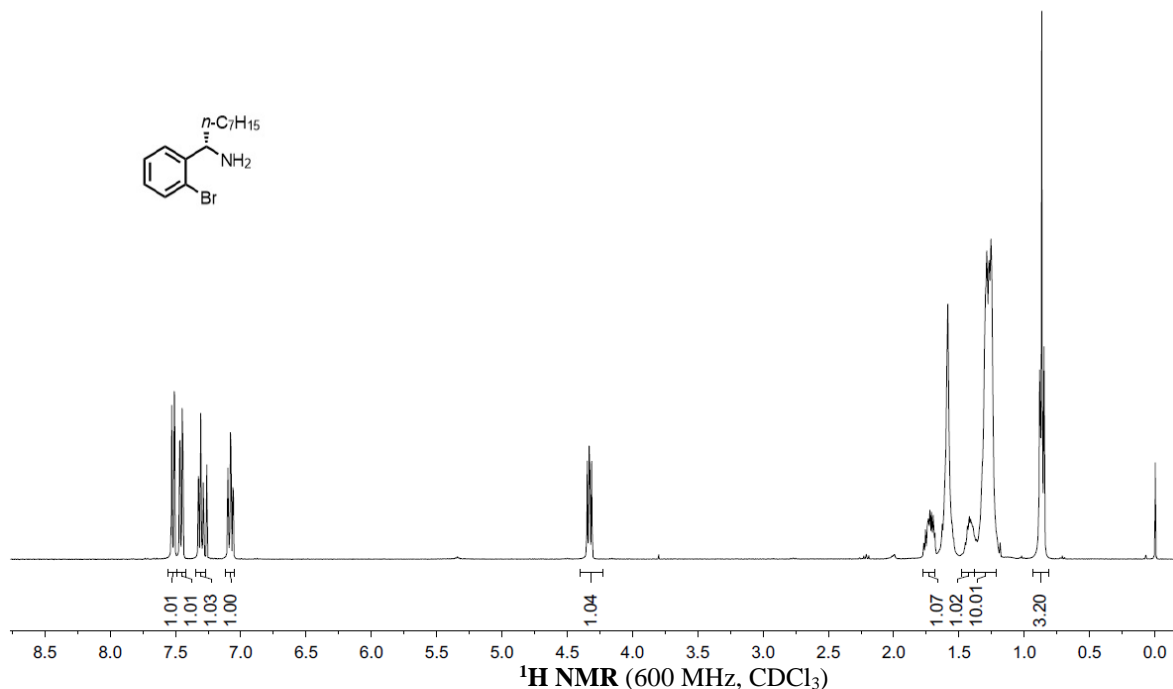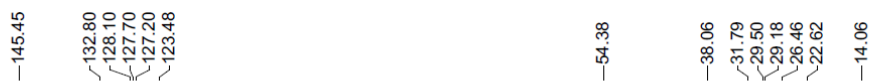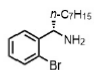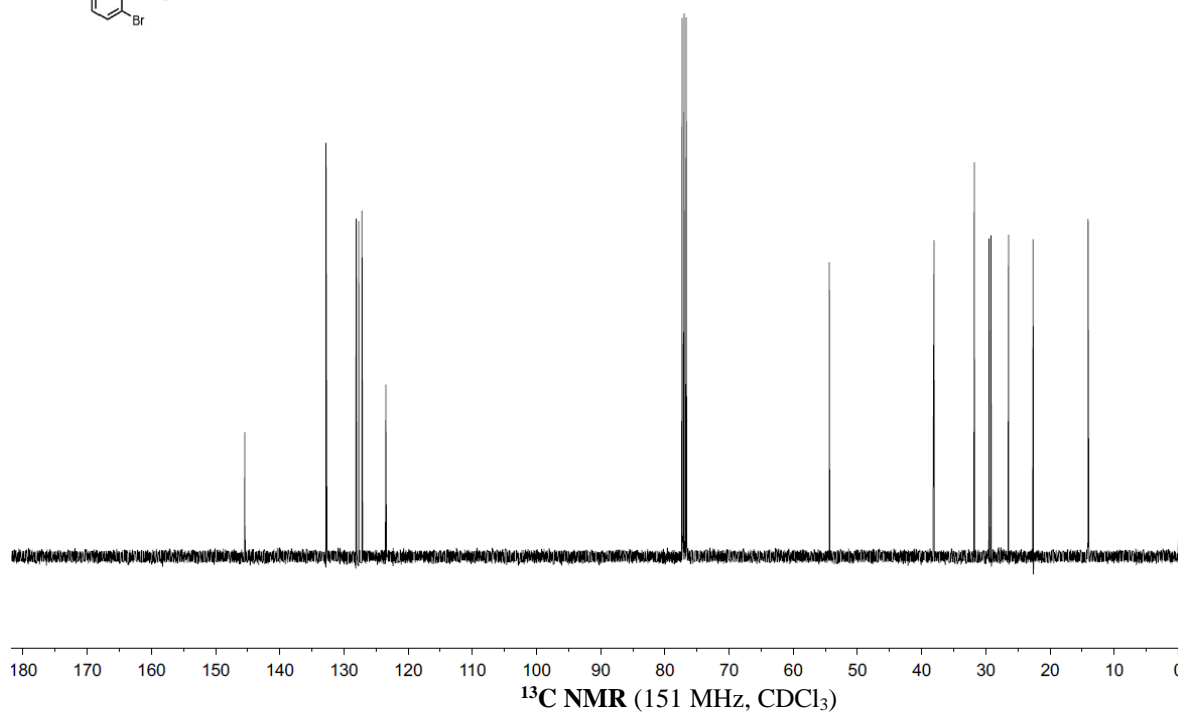

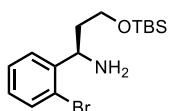

**4d**

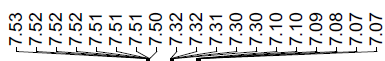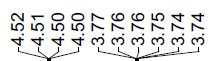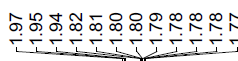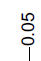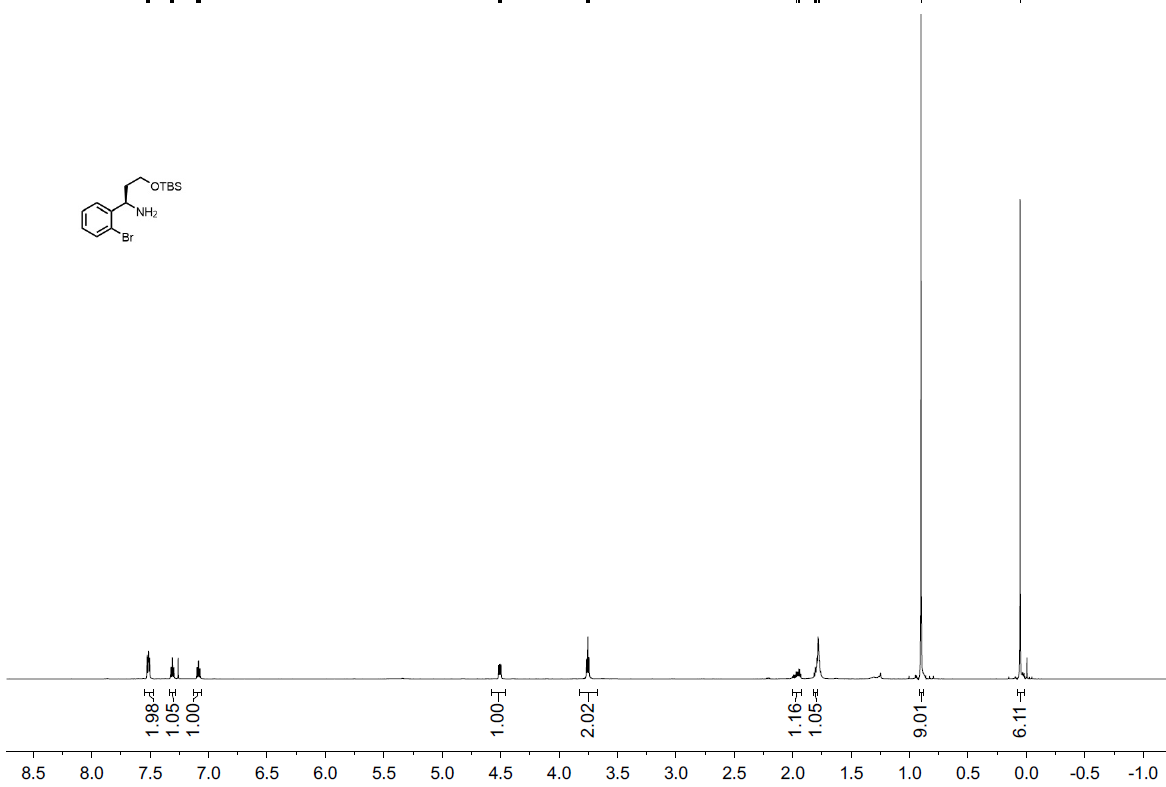

<sup>1</sup>H NMR (600 MHz, CDCl<sub>3</sub>)

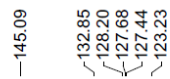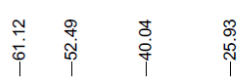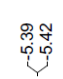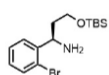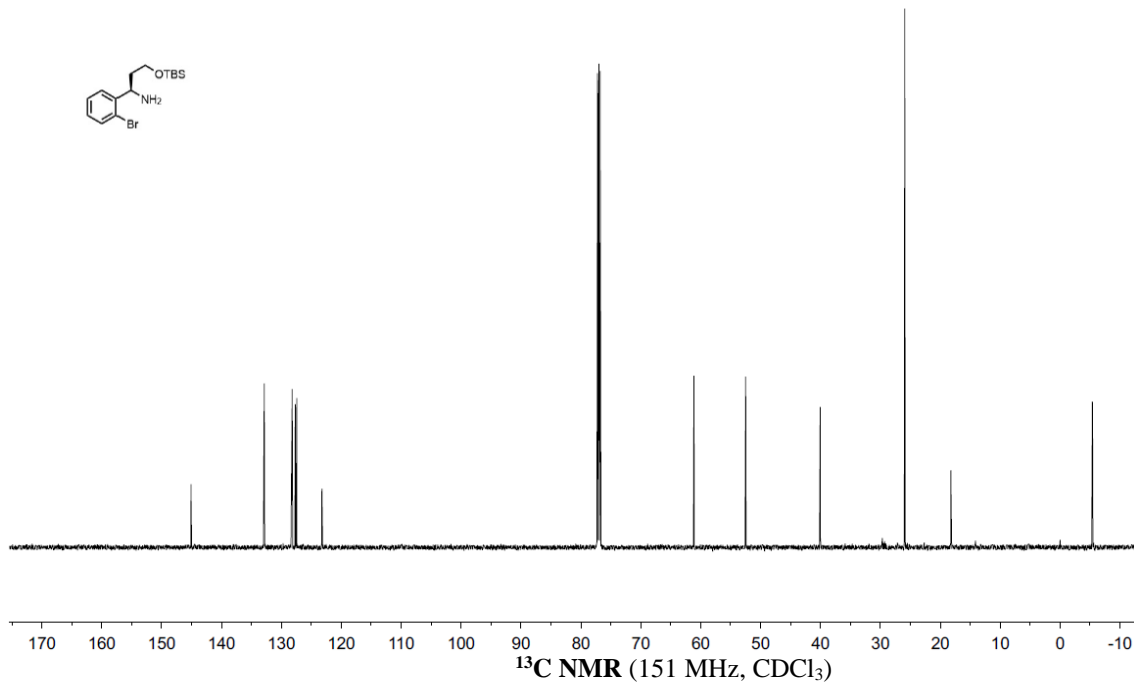

<sup>13</sup>C NMR (151 MHz, CDCl<sub>3</sub>)



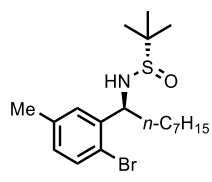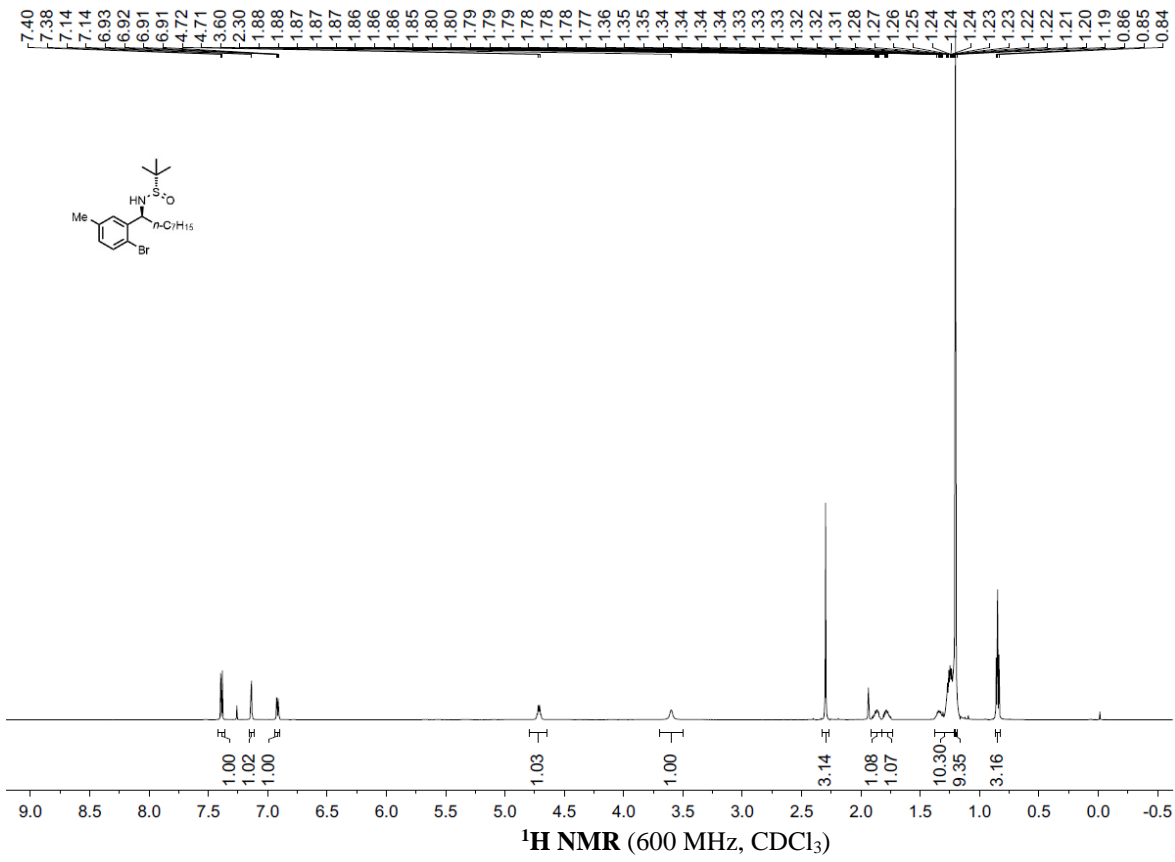

-141.30  
 -137.50  
 -132.77  
 -129.75  
 -129.00  
 -119.99  
 -58.49  
 -55.96  
 36.36  
 31.70  
 29.23  
 29.04  
 25.61  
 22.53  
 22.52  
 21.04  
 -14.02

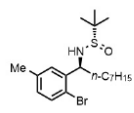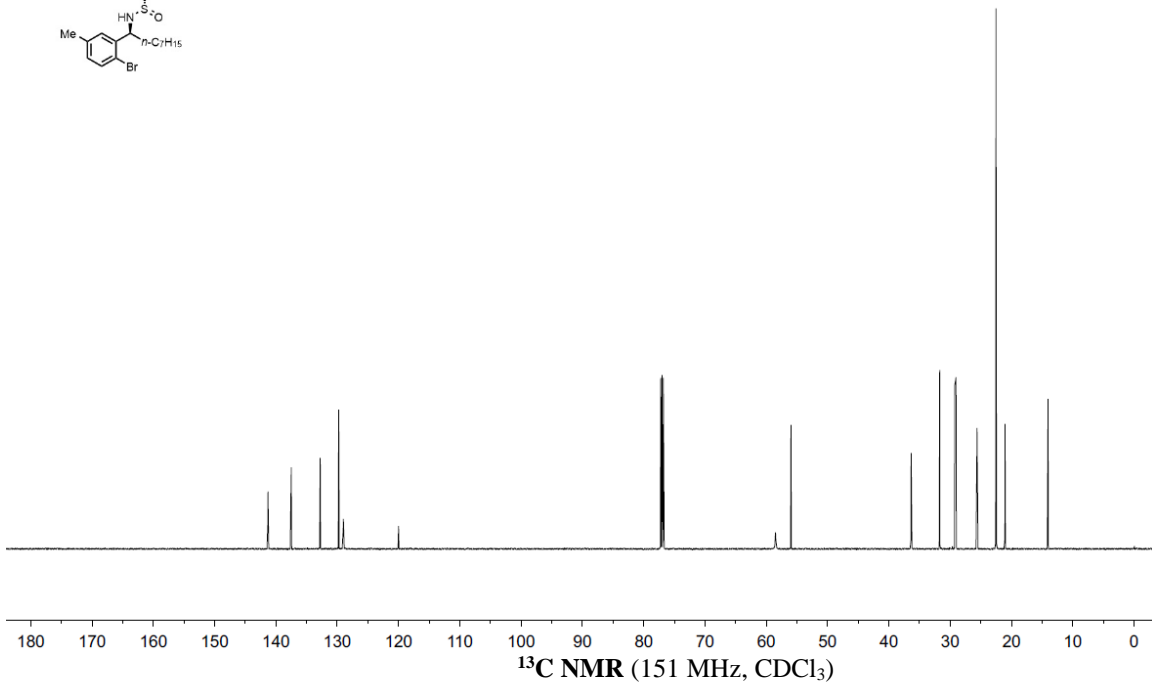

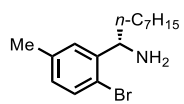

7.40  
 7.38  
 7.26  
 7.26  
 6.91  
 6.90  
 6.89

4.31  
 4.30  
 4.29  
 4.28  
 4.28  
 2.31  
 1.74  
 1.73  
 1.72  
 1.72  
 1.71  
 1.71  
 1.70  
 1.70  
 1.69  
 1.69  
 1.68  
 1.44  
 1.43  
 1.43  
 1.43  
 1.42  
 1.42  
 1.41  
 1.41  
 1.40  
 1.40  
 1.30  
 1.29  
 1.28  
 1.28  
 1.27  
 1.26  
 1.26  
 1.25  
 0.88  
 0.87  
 0.86

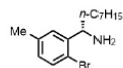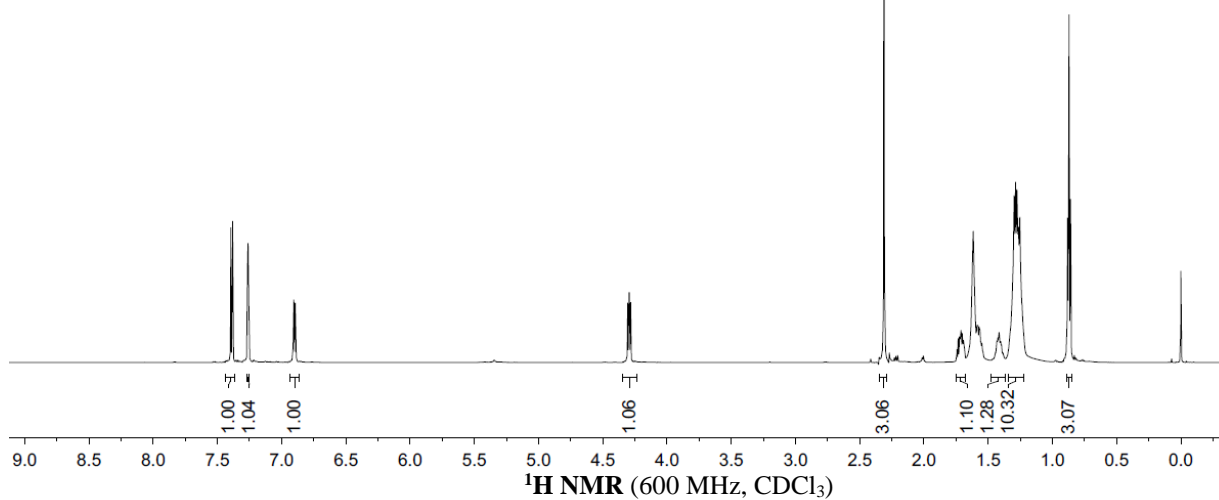

-144.94  
 -137.54  
 -132.46  
 -128.98  
 -127.85  
 -120.08

-54.26  
 -38.11  
 -31.80  
 -29.49  
 -29.18  
 -26.49  
 -22.63  
 -21.03  
 -14.08

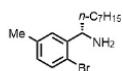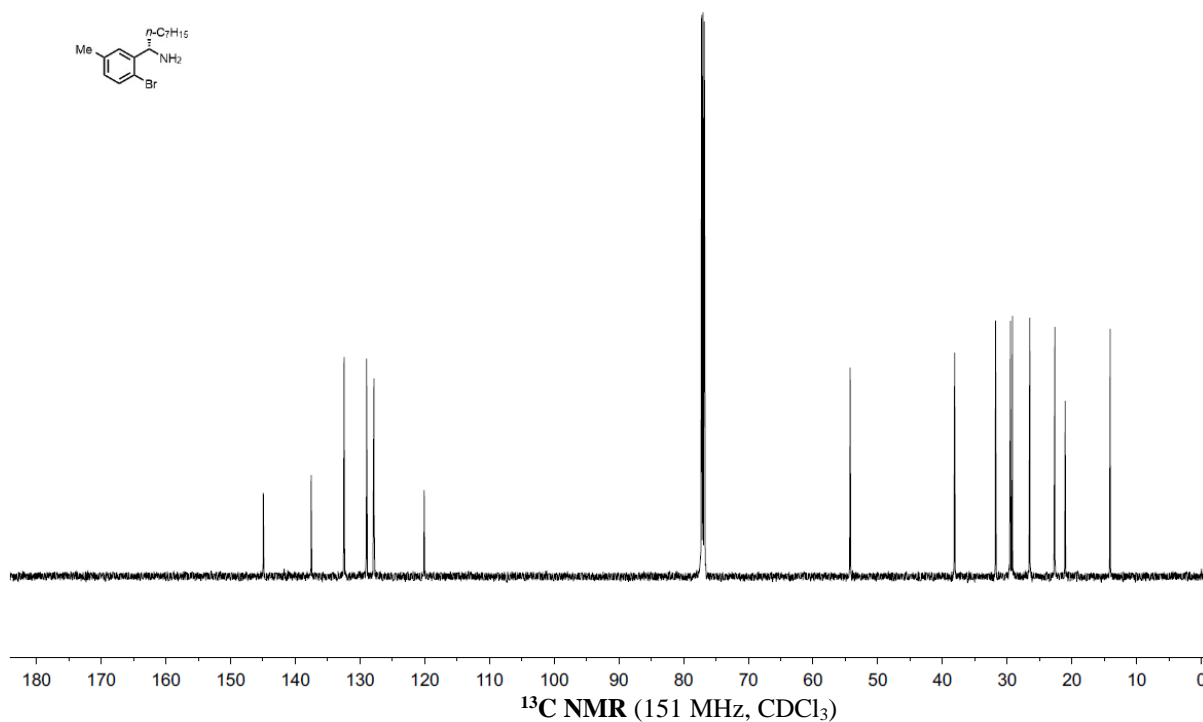

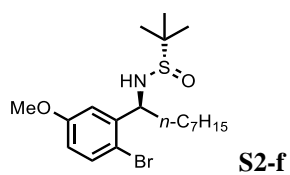

7.42  
7.40  
6.92  
6.91  
6.69  
6.68  
6.67  
6.66

4.73  
4.72  
4.70  
4.68

3.78  
3.60  
3.59  
1.88  
1.87  
1.86  
1.85  
1.84  
1.83  
1.82  
1.81  
1.80  
1.79  
1.78  
1.78  
1.76

1.28  
1.26  
1.26  
1.25  
1.25  
1.24  
1.23  
1.22  
1.20  
1.20  
0.85  
0.85

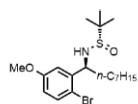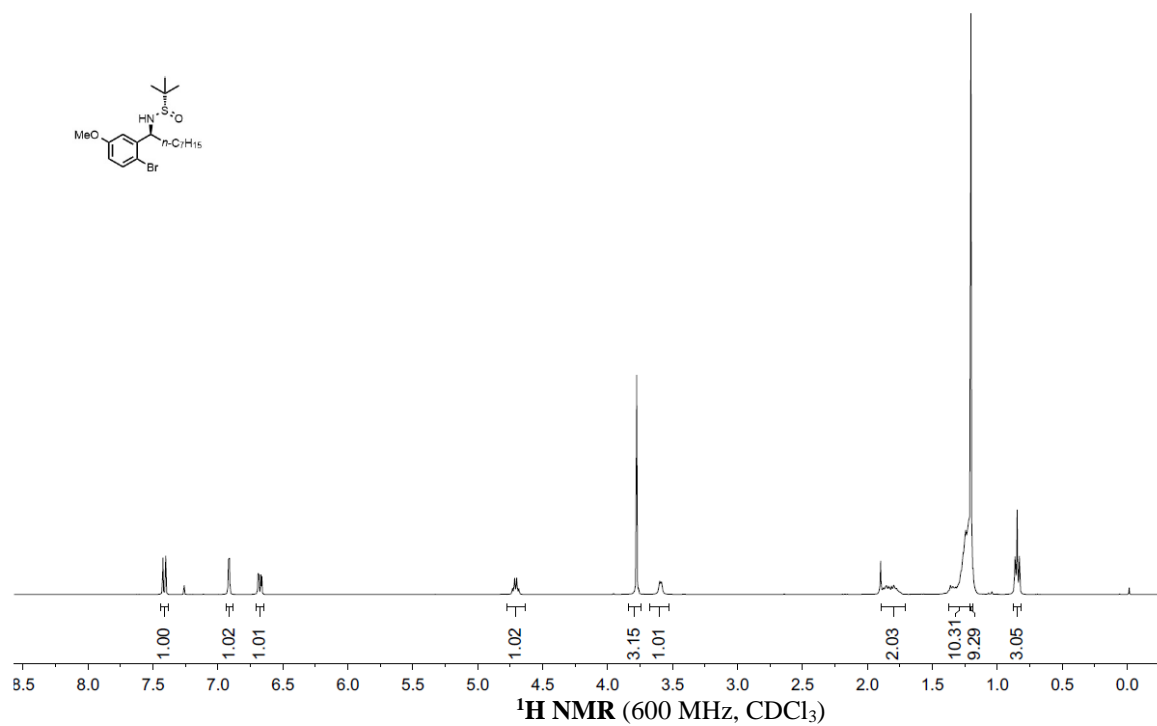

159.02  
142.78  
133.61  
114.47  
114.19  
113.67  
58.34  
56.02  
55.41  
36.20  
31.71  
29.27  
29.06  
25.47  
22.55  
22.53  
14.03

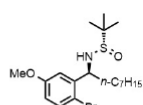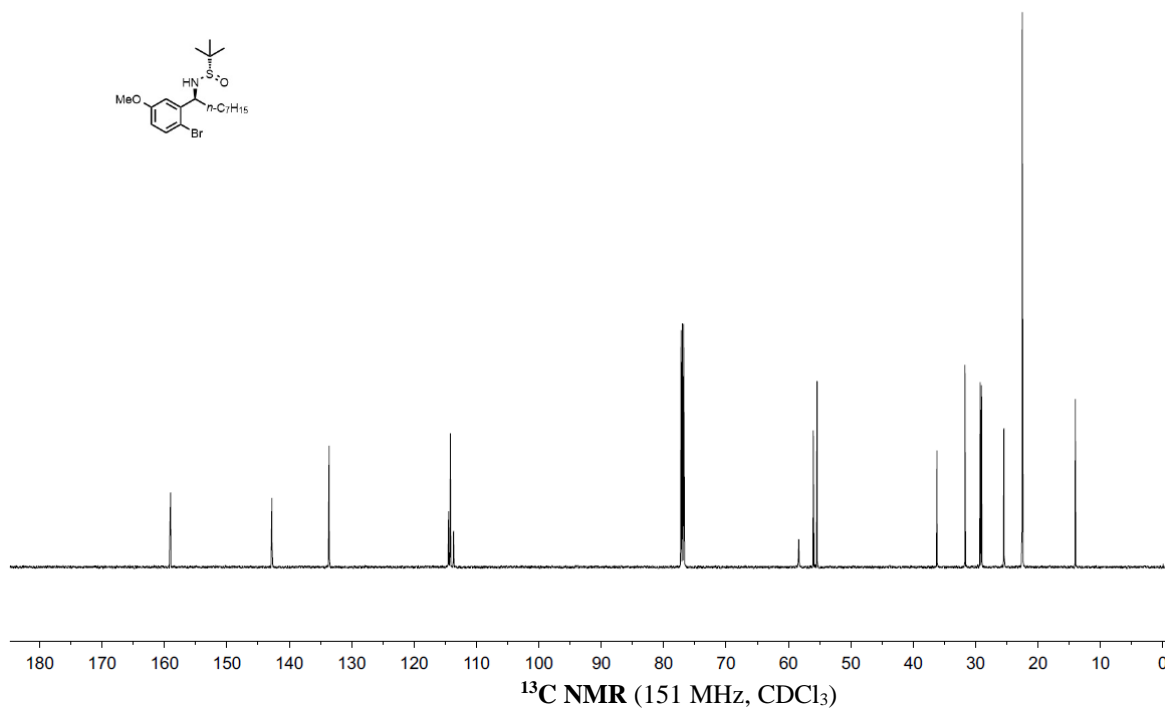

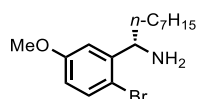

**4f**

7.41  
7.39  
7.03  
7.03  
6.67  
6.66  
6.65

4.29  
4.28  
4.28  
4.27  
3.80  
1.74  
1.72  
1.70  
1.70  
1.70  
1.69  
1.68  
1.42  
1.41  
1.40  
1.38  
1.31  
1.30  
1.29  
1.28  
1.27  
1.26  
1.25  
1.24  
1.23  
1.23  
0.87  
0.85

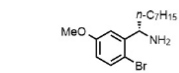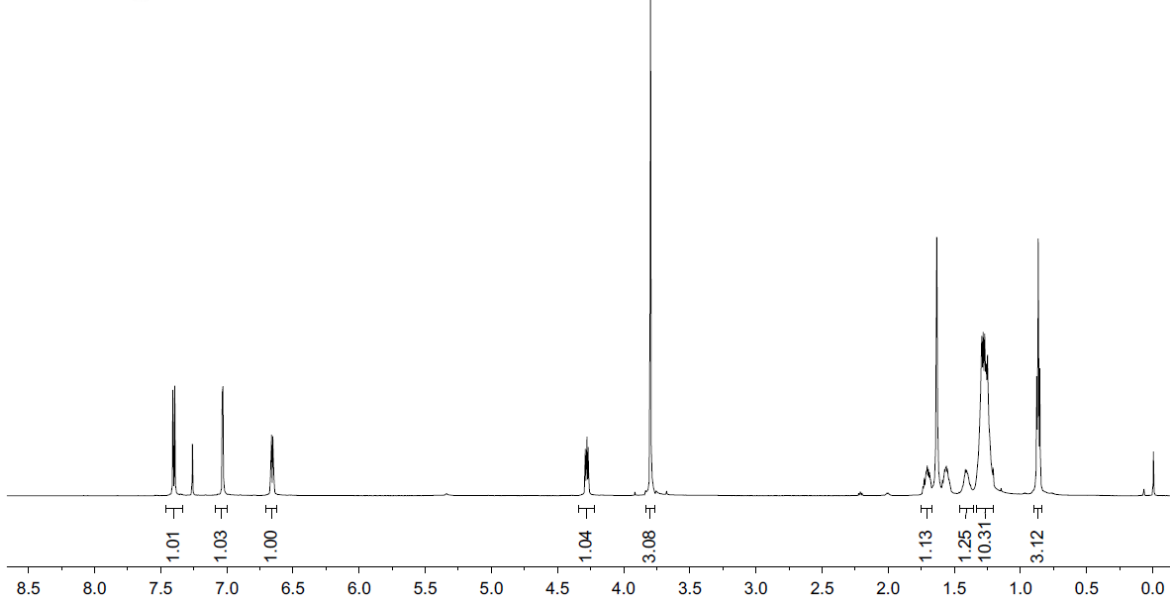

<sup>1</sup>H NMR (600 MHz, CDCl<sub>3</sub>)

159.26  
146.41  
133.29

113.89  
113.76  
112.84

55.46  
54.46

38.00  
31.80  
29.48  
29.18  
26.44  
22.63

14.08

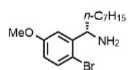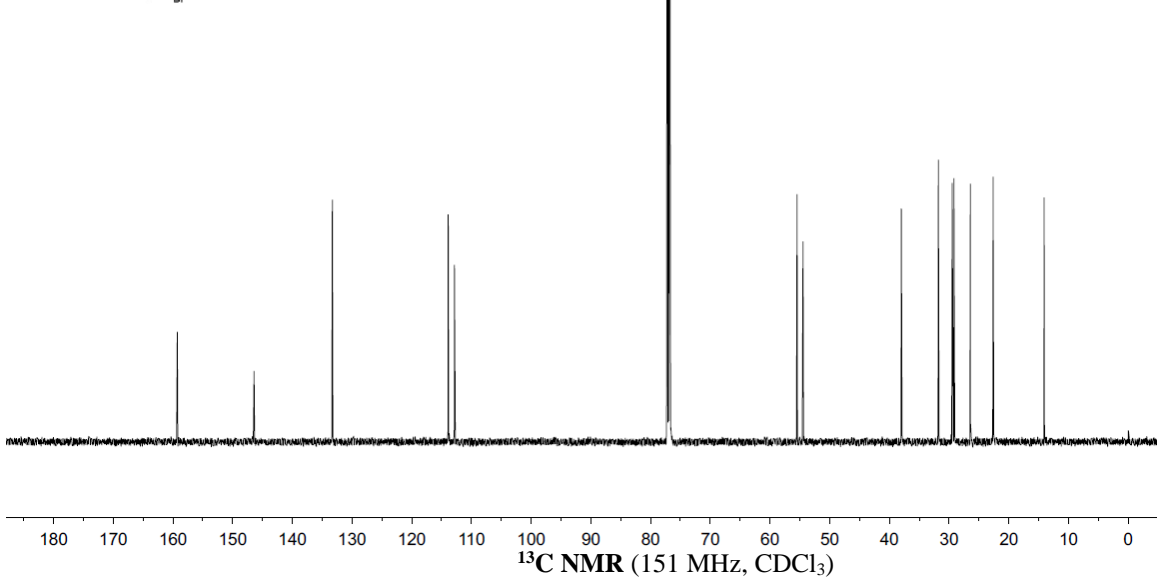

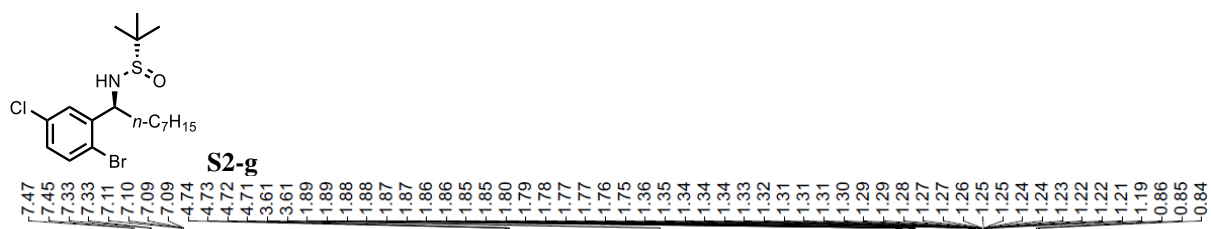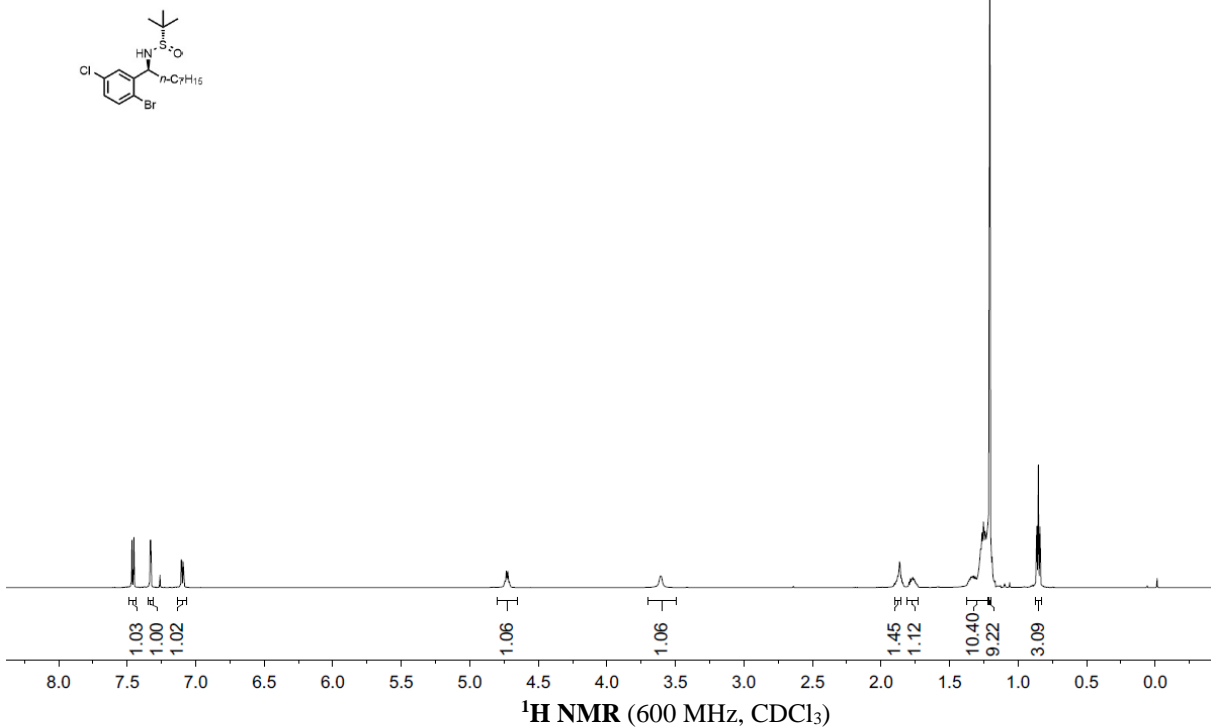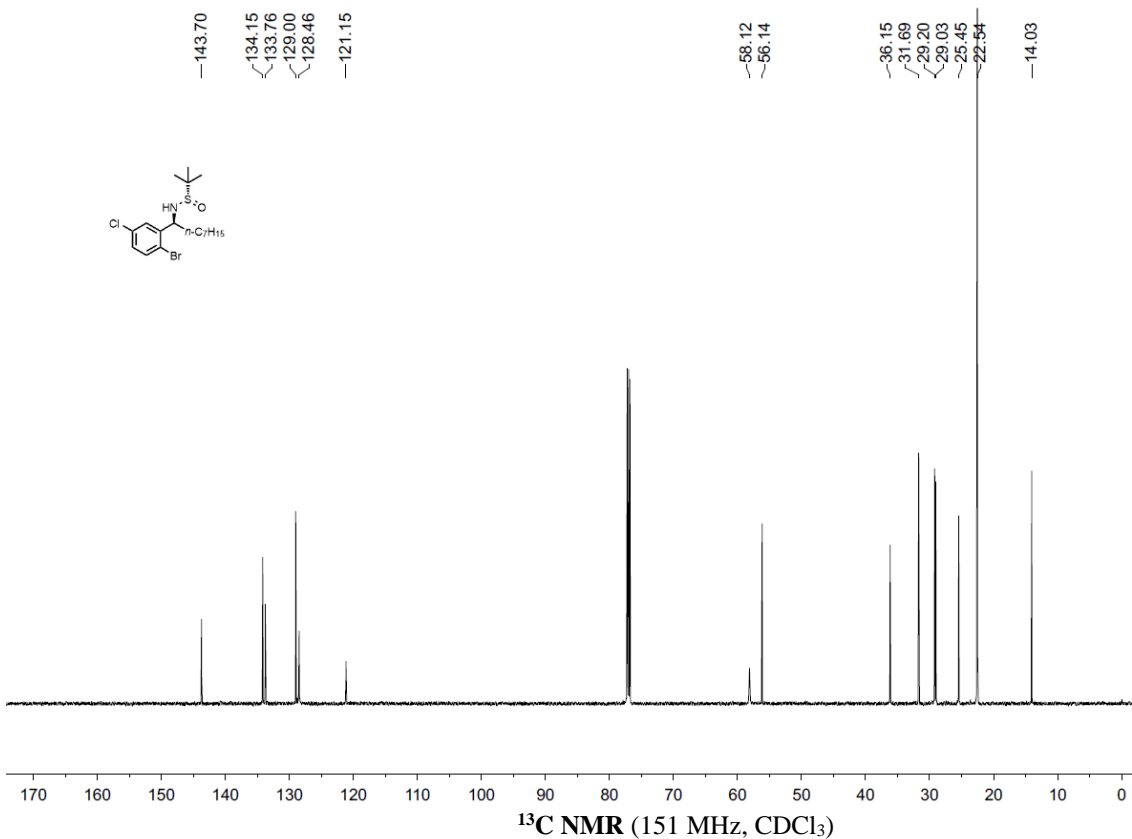

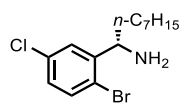

**4g**

7.47  
7.47  
7.44  
7.42  
7.07  
7.06  
7.05  
7.05

4.29  
4.28  
4.28  
4.27  
1.71  
1.70  
1.69  
1.68  
1.68  
1.67  
1.66  
1.65  
1.41  
1.41  
1.40  
1.38  
1.37  
1.37  
1.32  
1.30  
1.30  
1.30  
1.29  
1.28  
1.27  
1.26  
1.25  
0.88  
0.87  
0.85

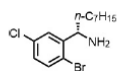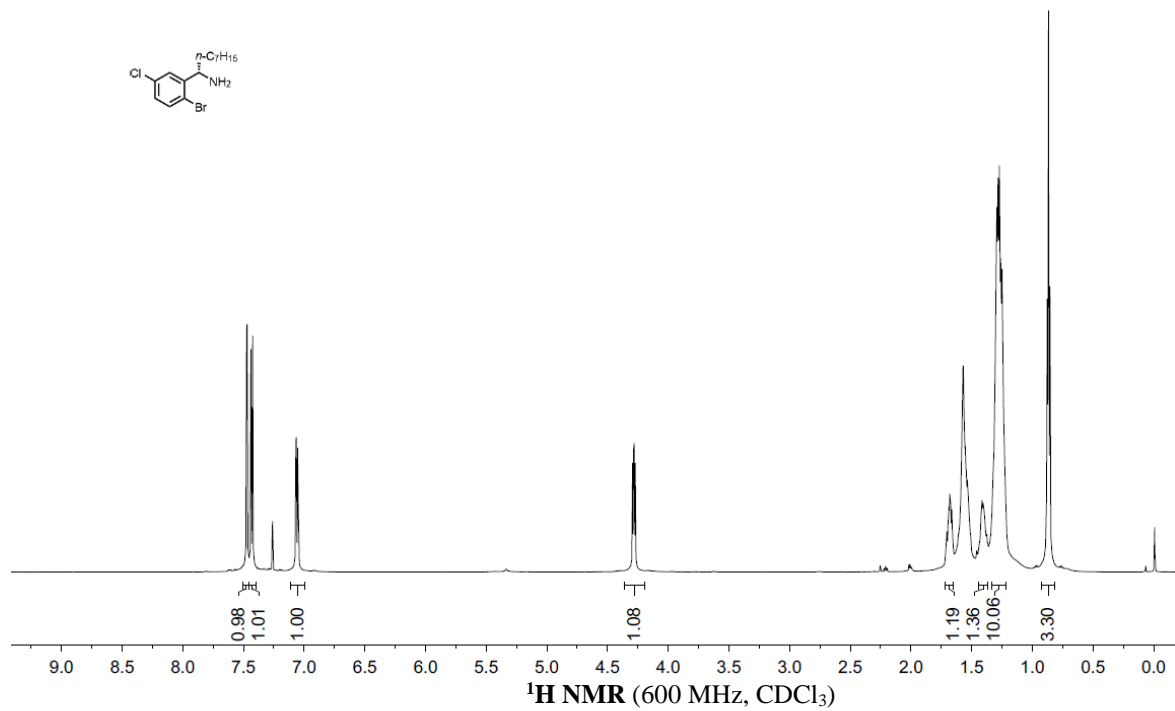

147.36  
133.82  
133.77  
128.17  
127.56  
121.03  
54.32  
37.97  
31.77  
29.41  
29.15  
26.35  
22.61  
14.07

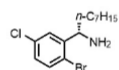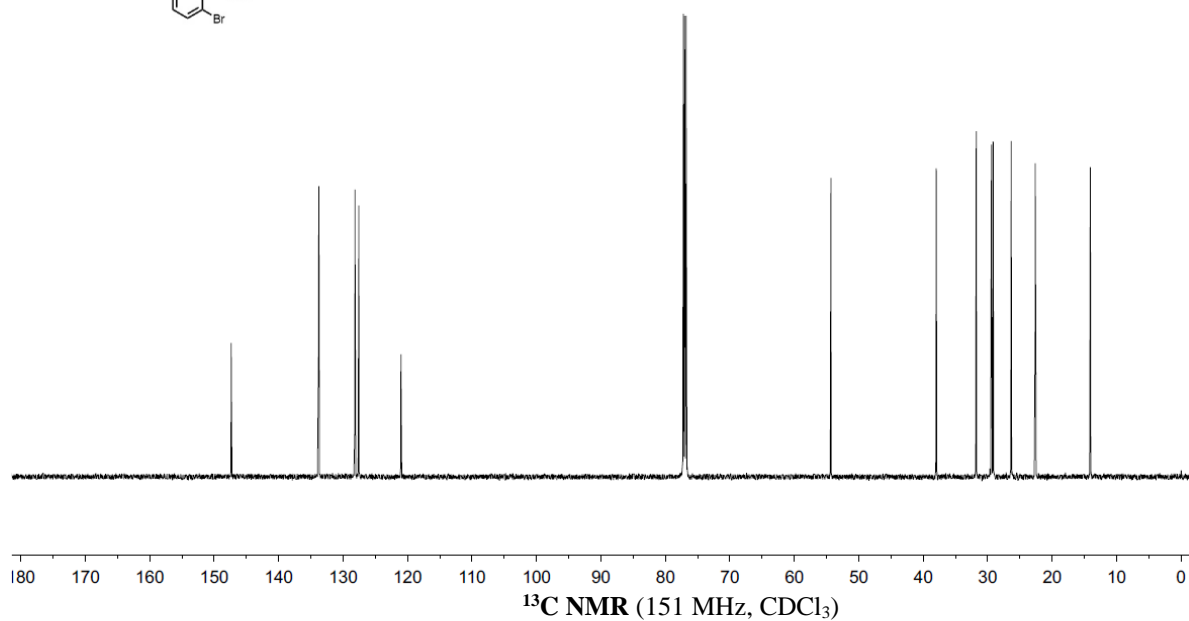

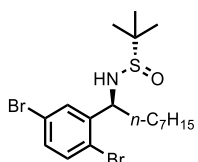

**S2-h**

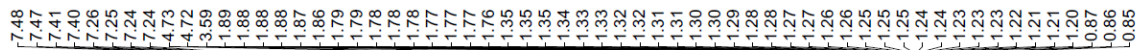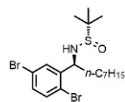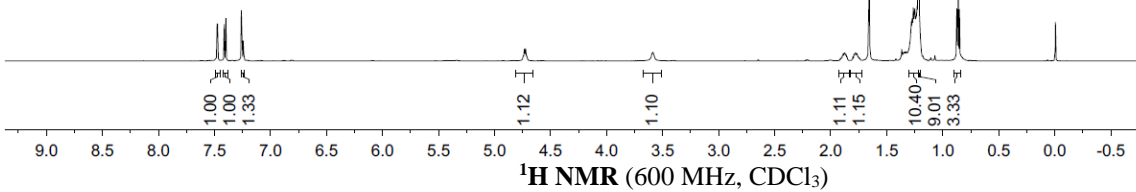

~144.02

~134.50

~131.98

~131.42

~122.01

~121.69

~58.15

~56.19

~36.20

~31.73

~29.23

~29.05

~25.50

~22.58

~22.56

~14.06

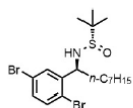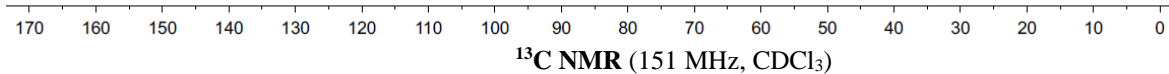

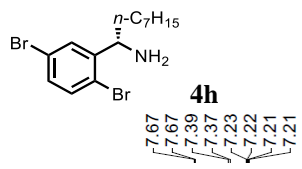

4.36, 4.35, 4.34, 4.33, 1.75, 1.74, 1.74, 1.73, 1.73, 1.72, 1.71, 1.70, 1.70, 1.65, 1.63, 1.62, 1.61, 1.61, 1.60, 1.31, 1.30, 1.30, 1.29, 1.28, 1.27, 1.26, 1.25, 1.23, 1.21, 0.88, 0.87, 0.85

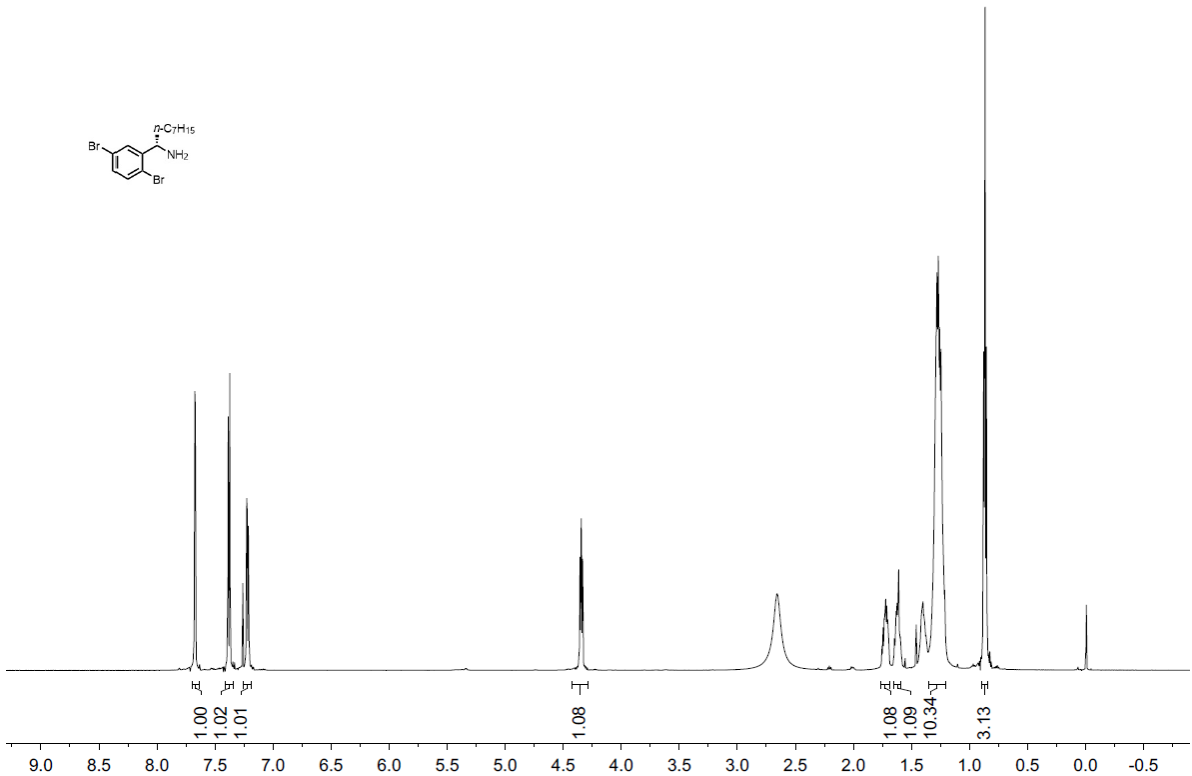

146.24, 134.17, 131.45, 130.62, 121.97, 121.85, 54.32, 37.44, 31.76, 29.33, 29.12, 26.21, 22.61, 14.07

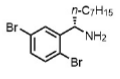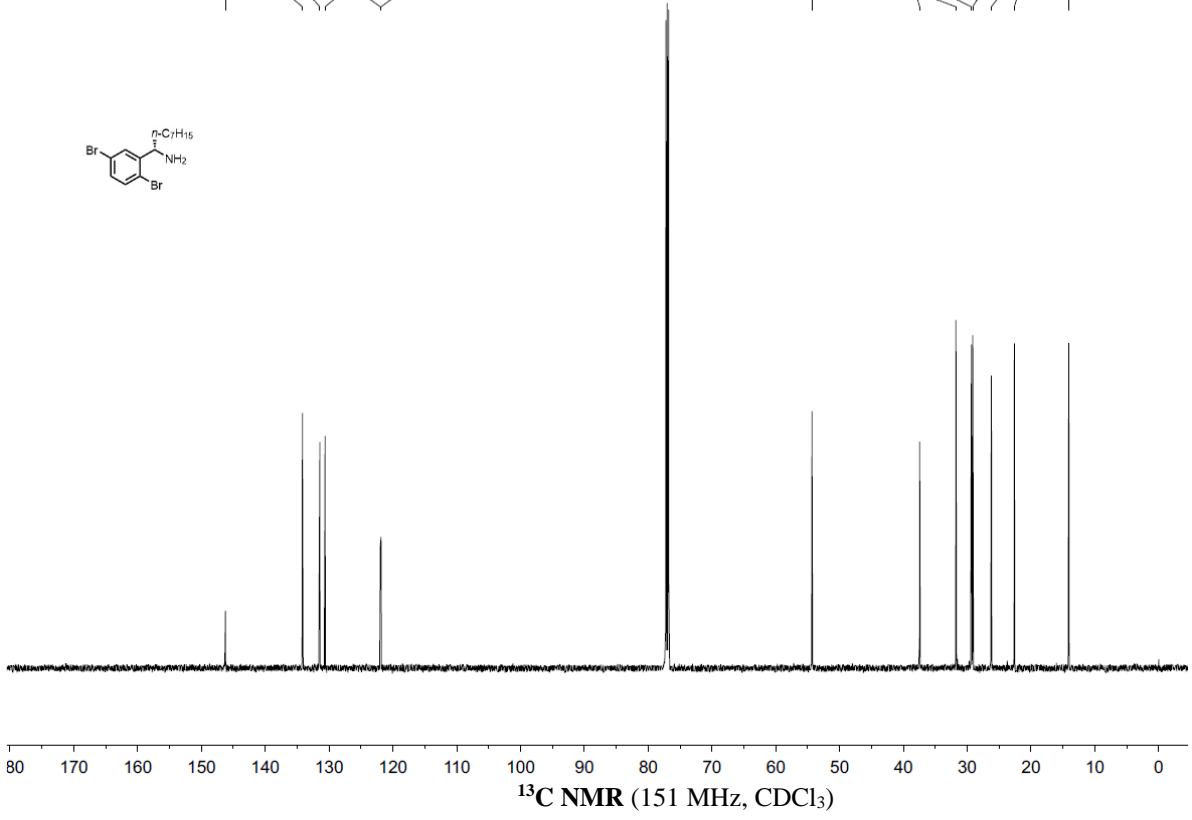



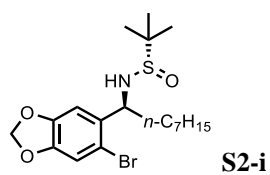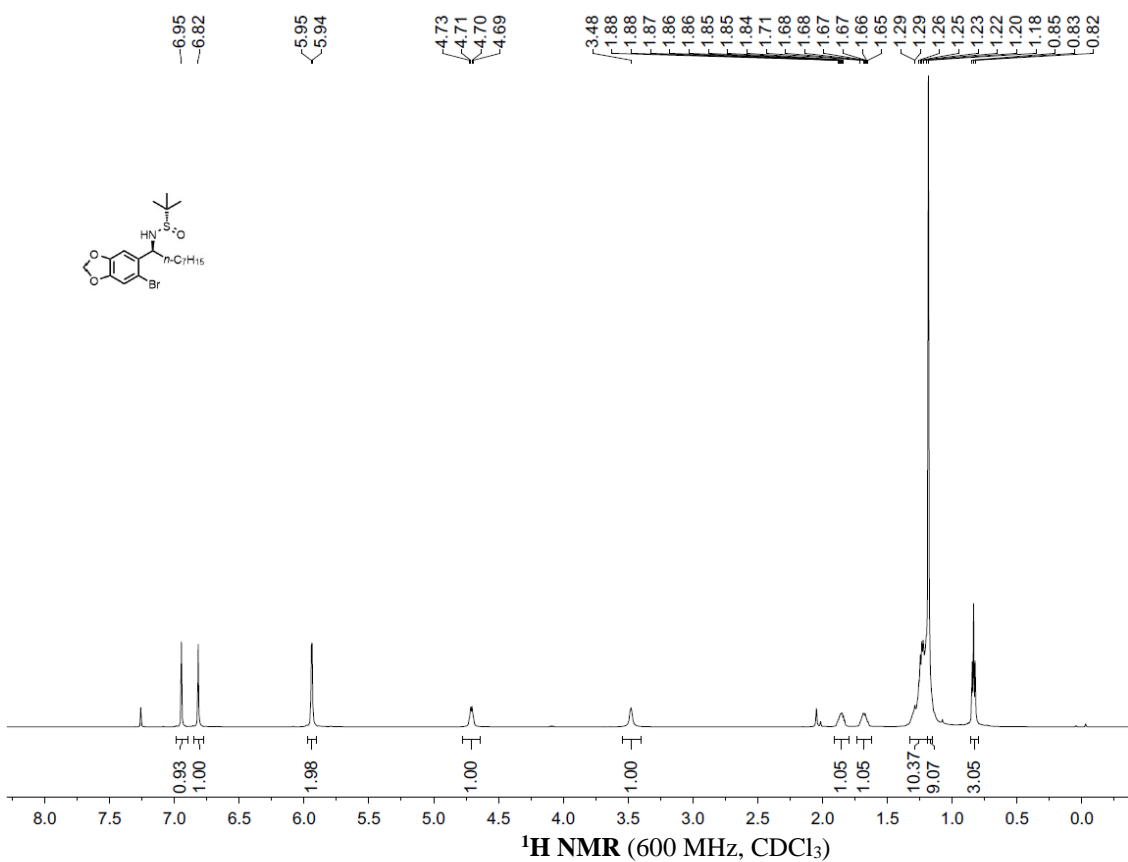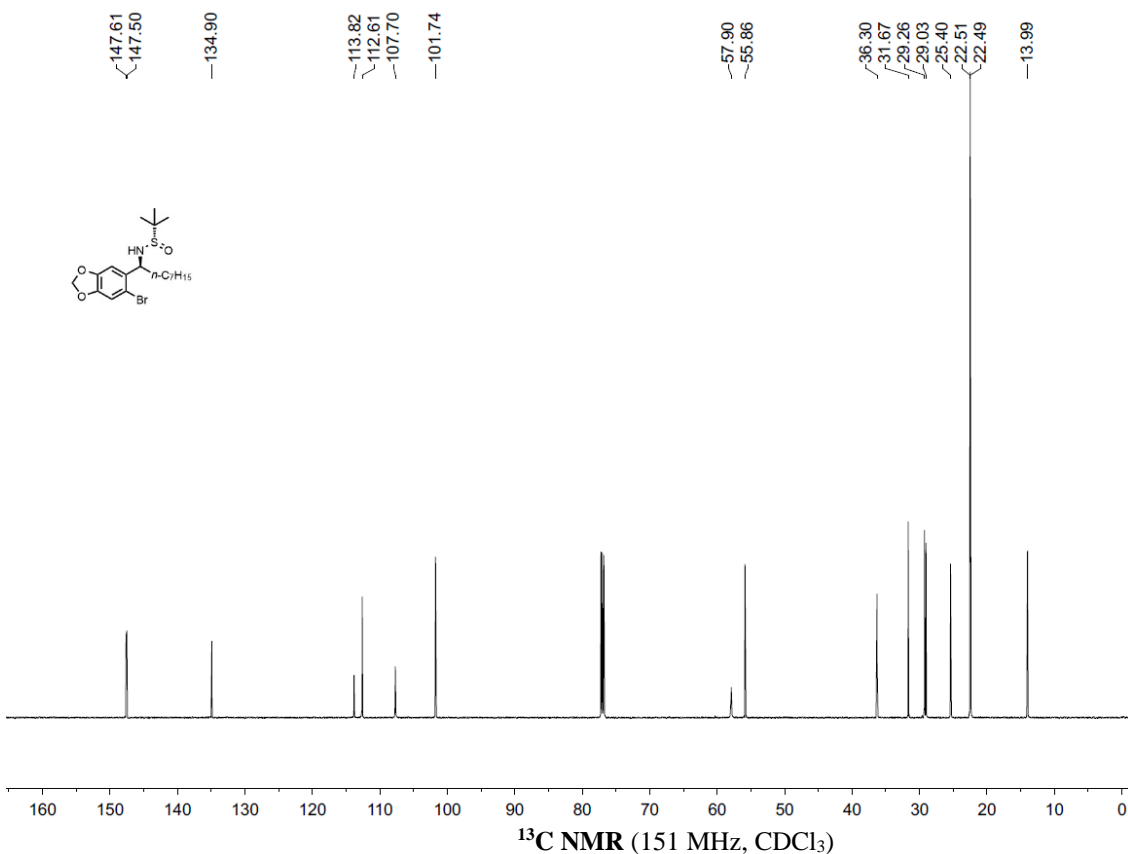

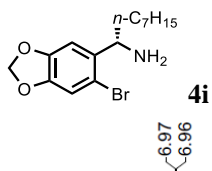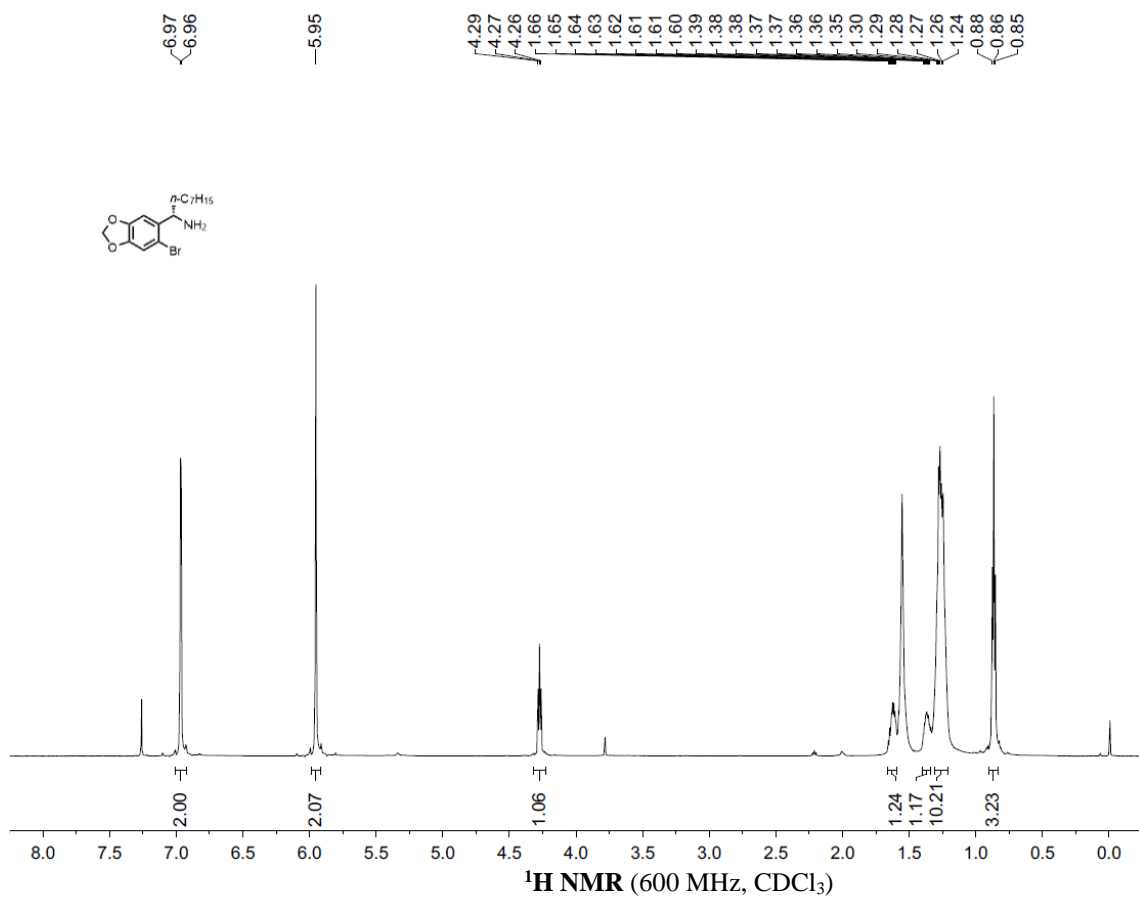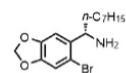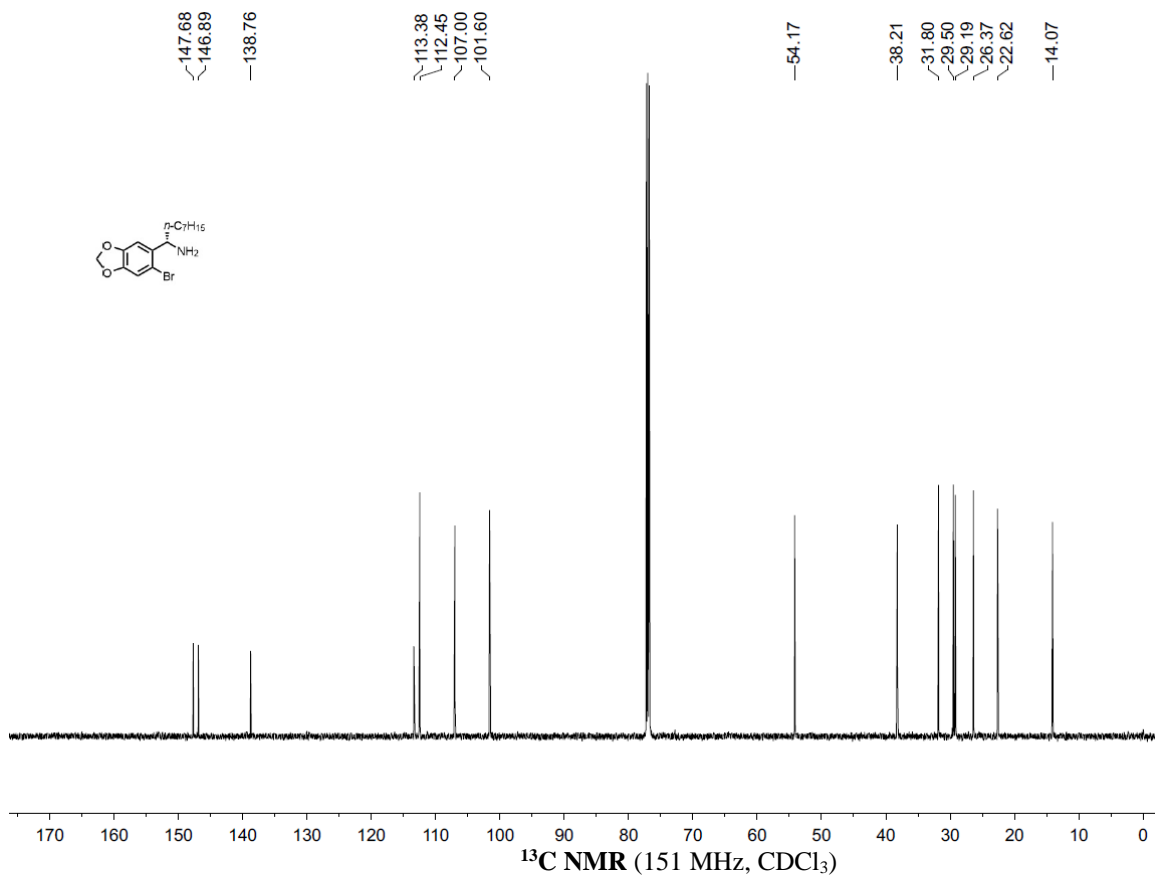

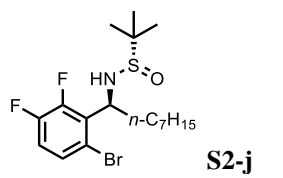

7.30  
7.29  
6.99  
6.97  
6.96  
6.94

4.83  
4.82  
4.82  
4.80  
4.79

3.94

1.92  
1.80  
1.46  
1.32  
1.30  
1.29  
1.28  
1.27  
1.26  
1.24  
1.22

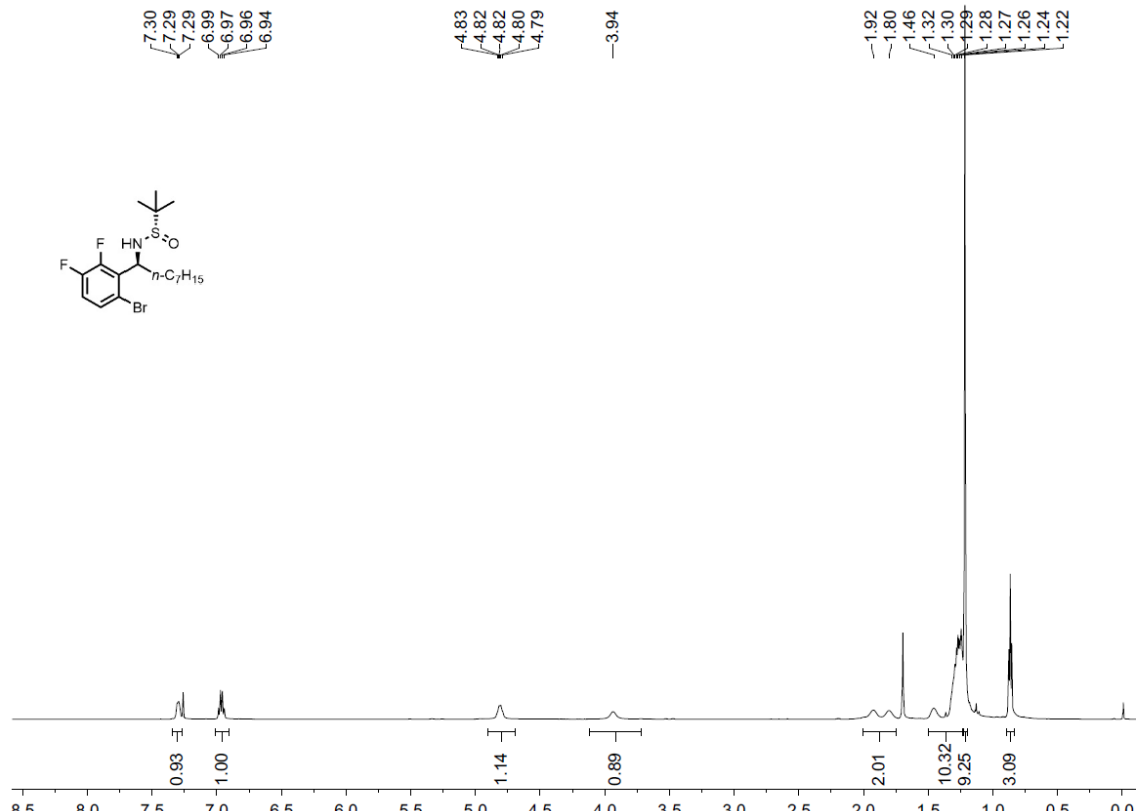

<sup>1</sup>H NMR (600 MHz, CDCl<sub>3</sub>)

151.07  
150.98  
149.42  
149.32

132.97  
128.50

117.21  
117.09

60.04  
56.30

35.73  
31.77  
29.10  
29.04  
26.24  
22.62  
22.55  
14.09

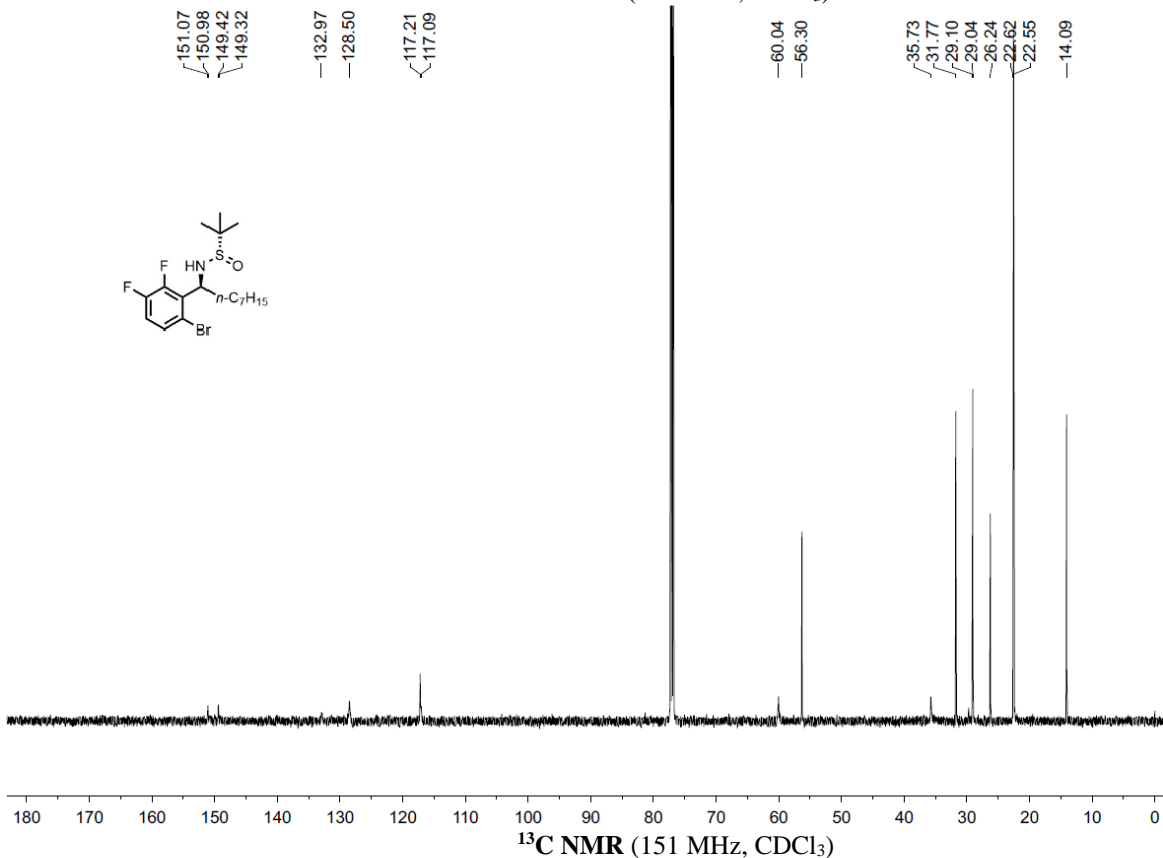

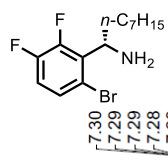

7.30, 7.29, 7.28, 7.28, 7.27, 7.27, 6.96, 6.95, 6.93, 6.92

4.38, 4.37, 4.35

1.86, 1.85, 1.84, 1.82, 1.45, 1.43, 1.42, 1.31, 1.29, 1.29, 1.27, 1.26, 1.25, 1.24, 1.22, 1.21, 1.20, 1.19, 0.88, 0.87, 0.00

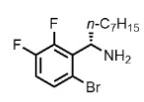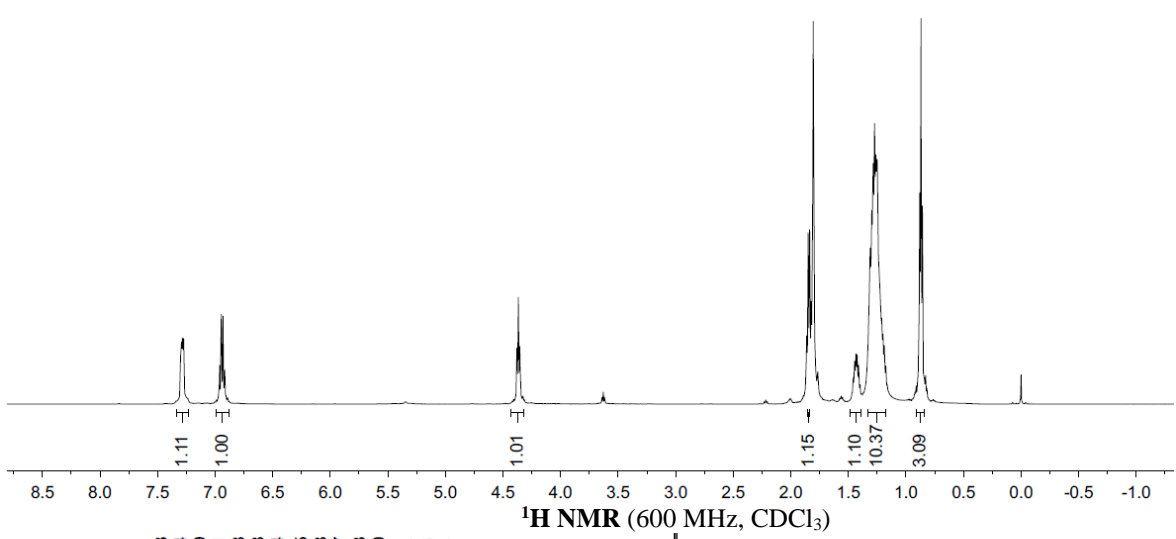

151.23, 151.14, 150.79, 150.71, 149.58, 149.48, 149.04, 135.45, 135.38, 128.37, 128.33, 128.30, 117.14, 116.26, 116.14

-55.03, 36.64, 31.77, 29.40, 29.13, 26.69, 22.60, -14.05

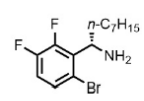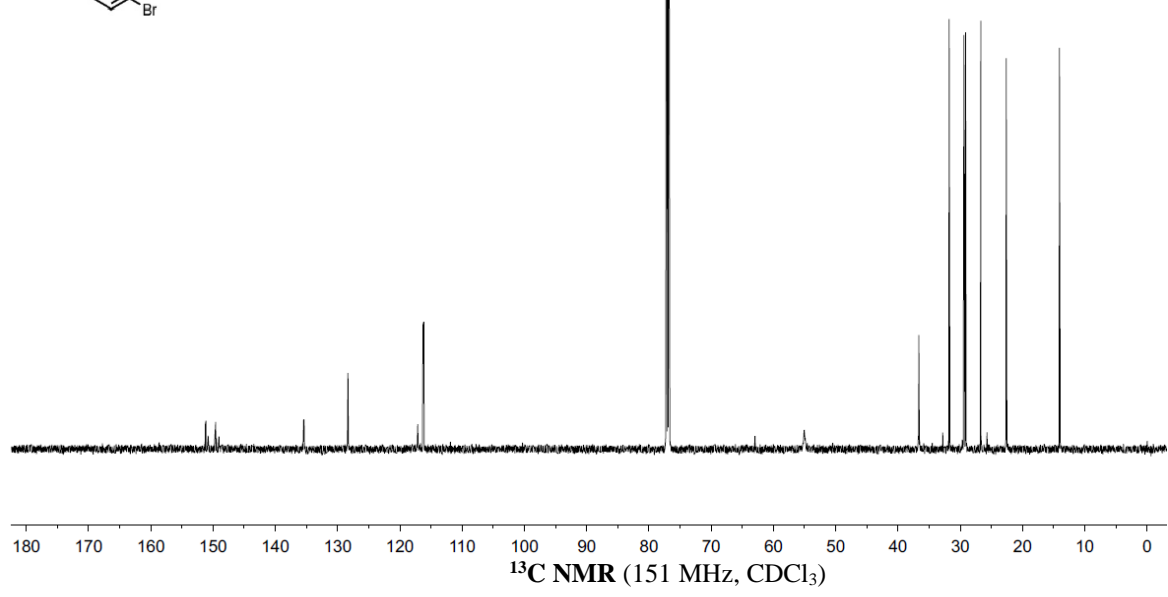

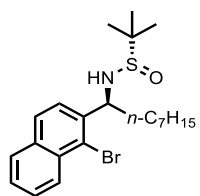

**S2-k**

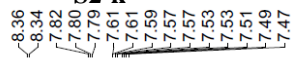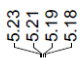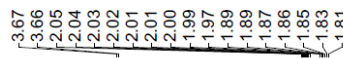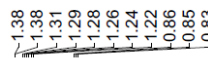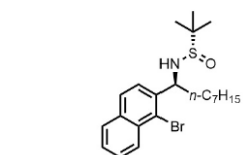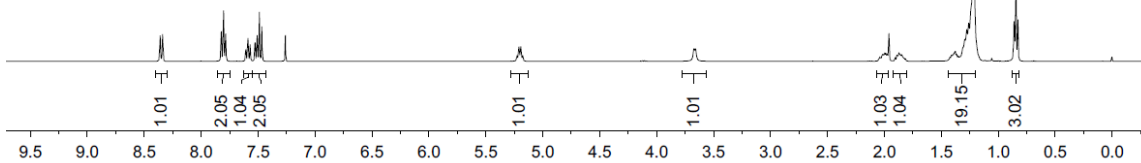

<sup>1</sup>H NMR (600 MHz, CDCl<sub>3</sub>)

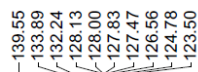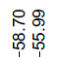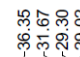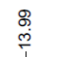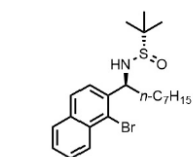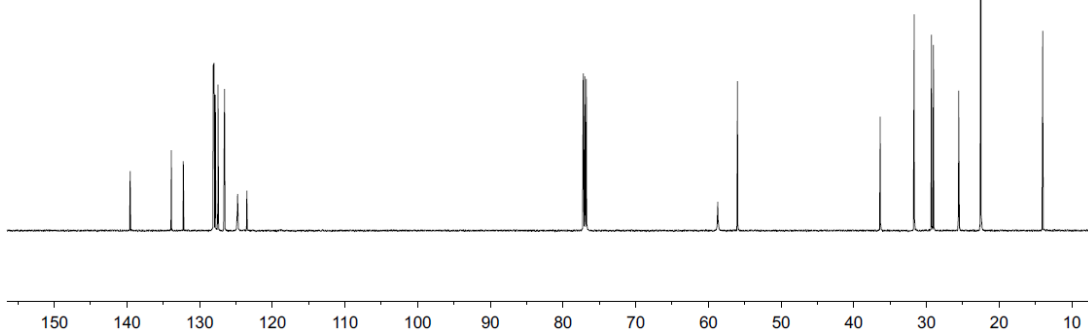

<sup>13</sup>C NMR (151 MHz, CDCl<sub>3</sub>)

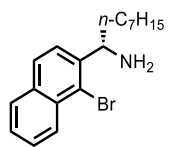

**4k**

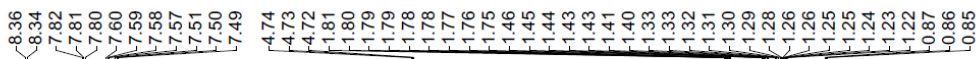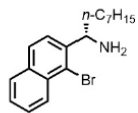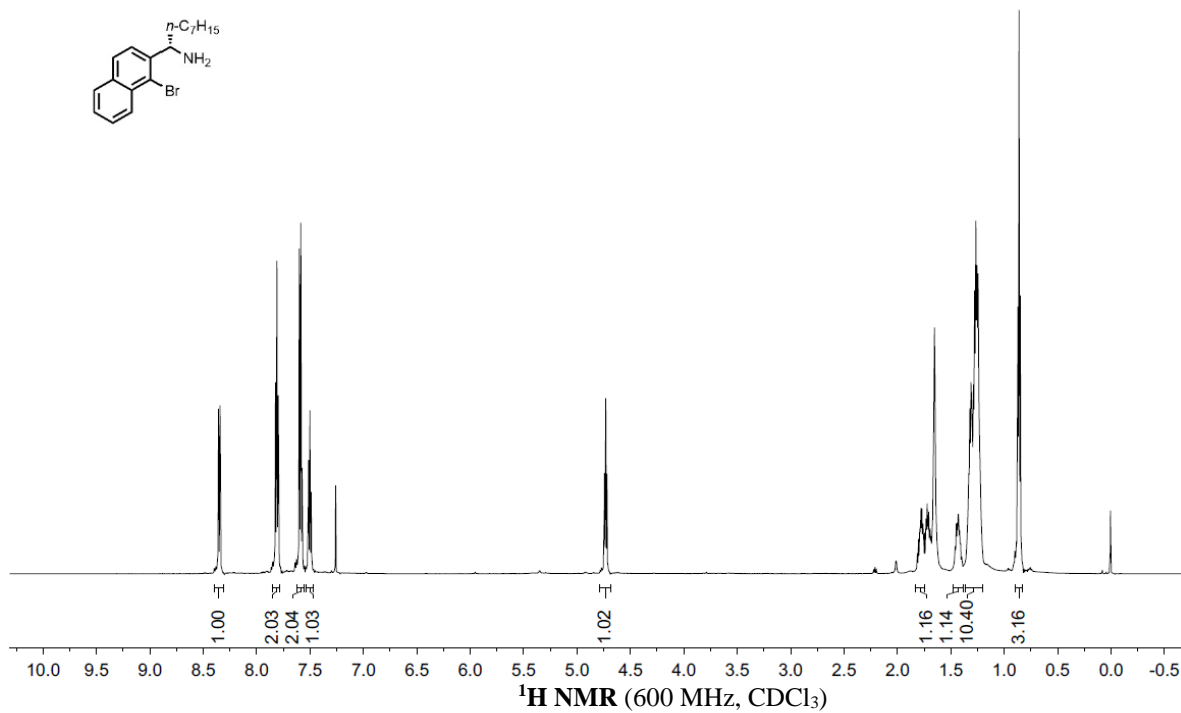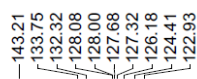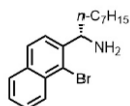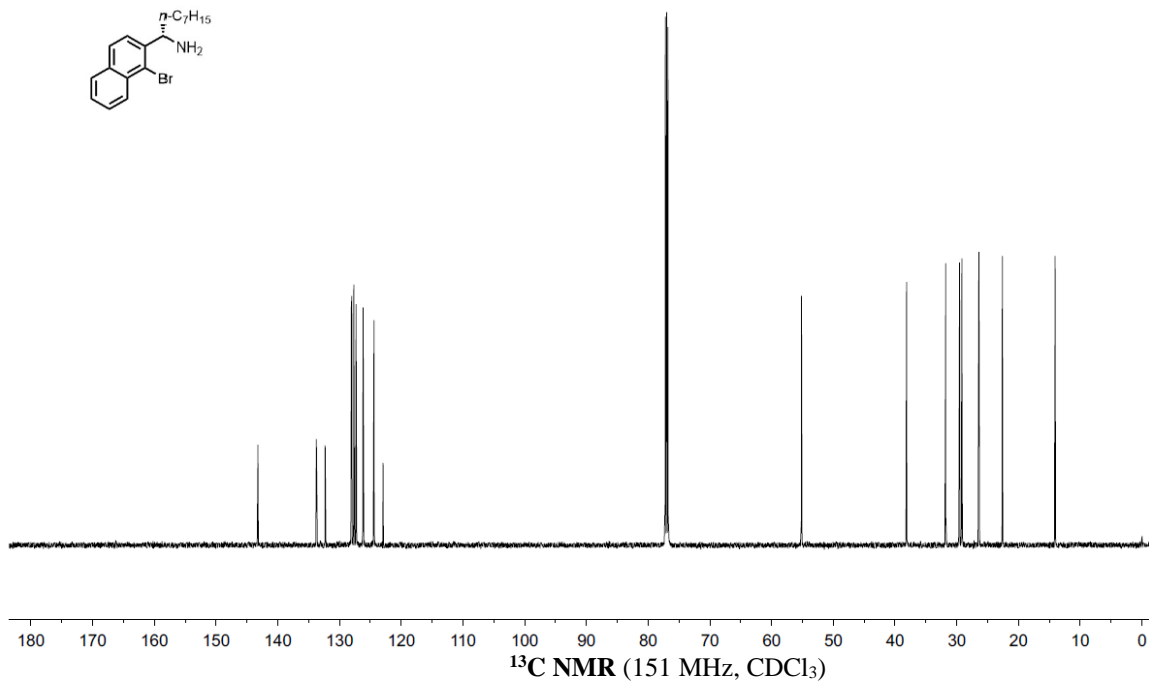

## 11.2 NMR Spectra of the Products

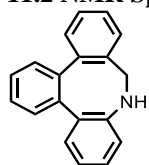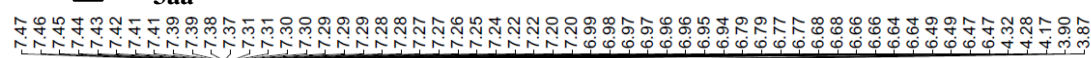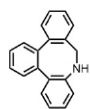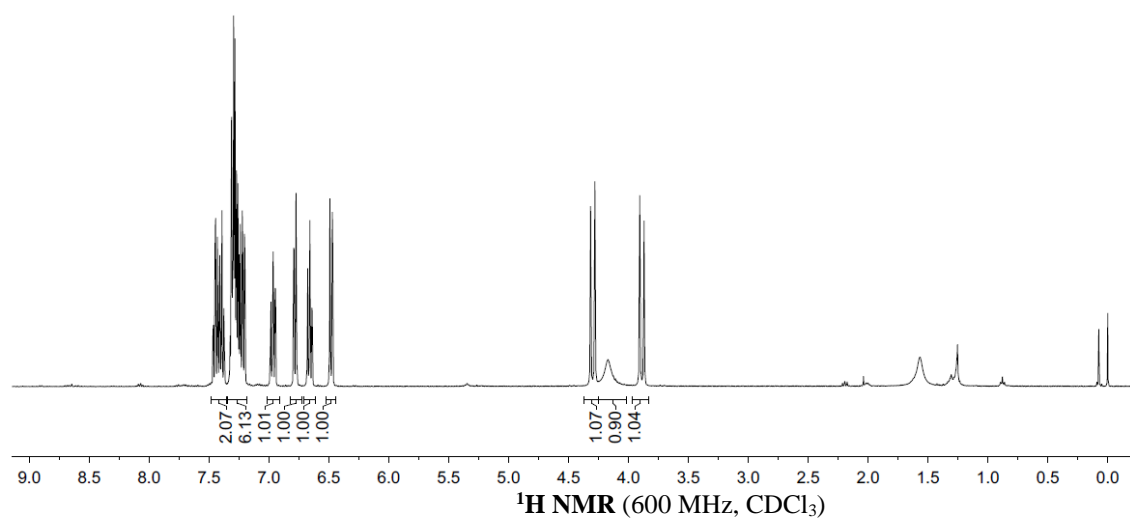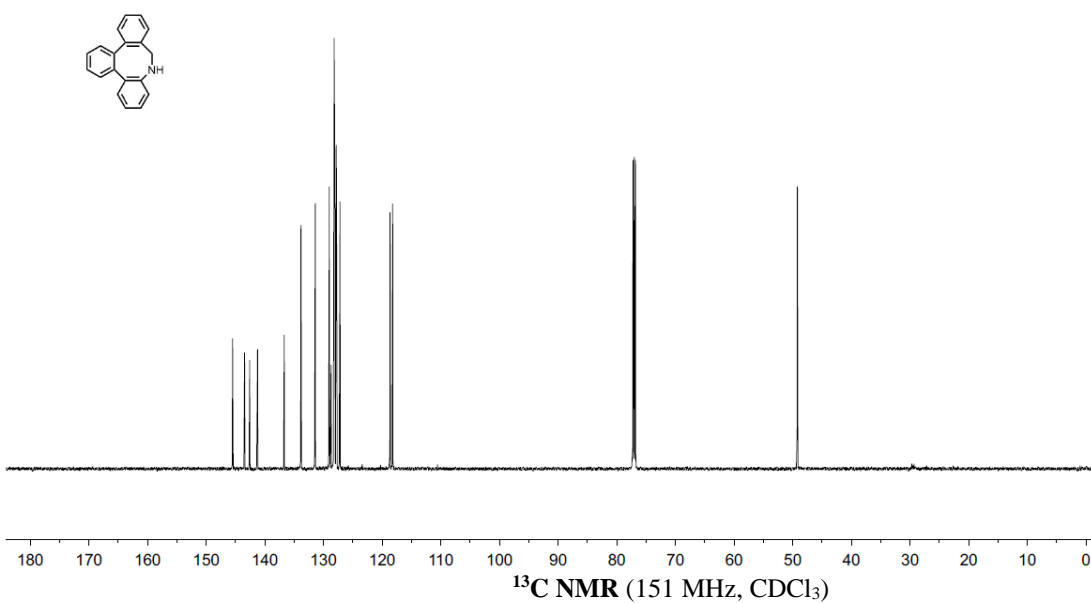

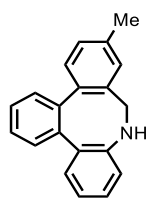

**3ab**

7.47  
7.47  
7.46  
7.46  
7.45  
7.44  
7.42  
7.42  
7.41  
7.41  
7.40  
7.40  
7.33  
7.33  
7.32  
7.32  
7.24  
7.22  
7.13  
7.12  
7.09  
7.02  
7.01  
7.00  
7.00  
6.99  
6.99  
6.82  
6.82  
6.81  
6.81  
6.70  
6.70  
6.69  
6.69  
6.68  
6.68  
6.53  
6.53  
6.51  
6.51  
4.32  
4.30  
4.18  
3.88  
3.85  
2.36

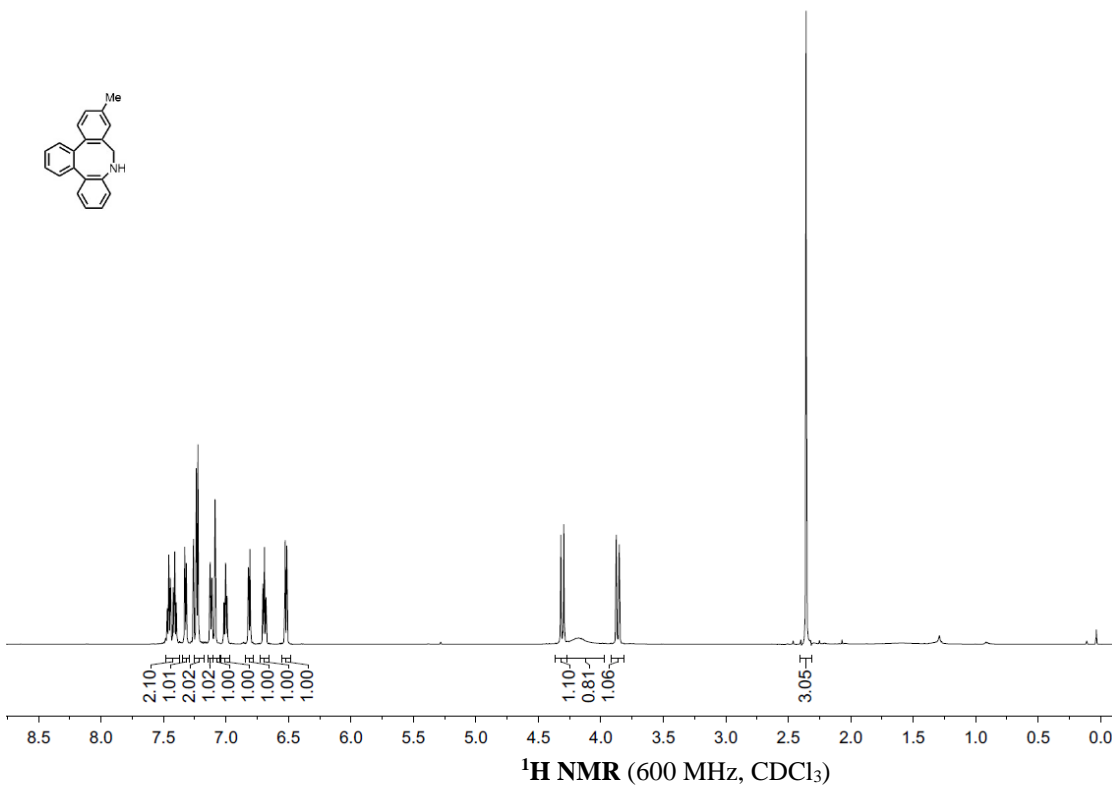

$^1\text{H}$  NMR (600 MHz,  $\text{CDCl}_3$ )

145.56  
142.59  
141.24  
140.57  
137.77  
136.52  
133.88  
131.39  
129.06  
128.85  
128.83  
128.59  
127.99  
127.68  
127.14  
118.62  
118.21

-49.25

-21.17

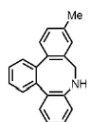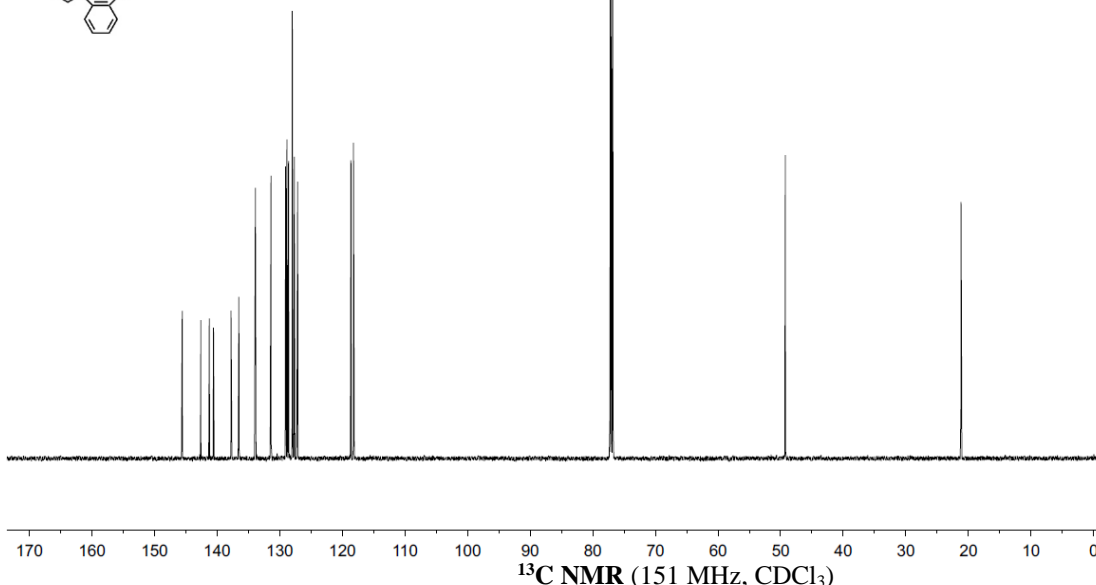

$^{13}\text{C}$  NMR (151 MHz,  $\text{CDCl}_3$ )



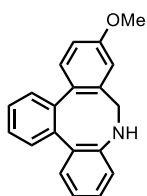

7.46  
7.46  
7.45  
7.45  
7.44  
7.43  
7.42  
7.41  
7.40  
7.40  
7.39  
7.39  
7.33  
7.33  
7.32  
7.31  
7.27  
7.25  
7.22  
7.22  
7.21  
7.21  
7.02  
7.01  
7.00  
7.00  
6.99  
6.99  
6.86  
6.86  
6.85  
6.84  
6.84  
6.82  
6.82  
6.81  
6.81  
6.80  
6.80  
6.71  
6.70  
6.69  
6.69  
6.68  
6.68  
6.53  
6.53  
6.52  
6.51  
4.32  
4.30  
4.20  
3.87  
3.84  
3.81

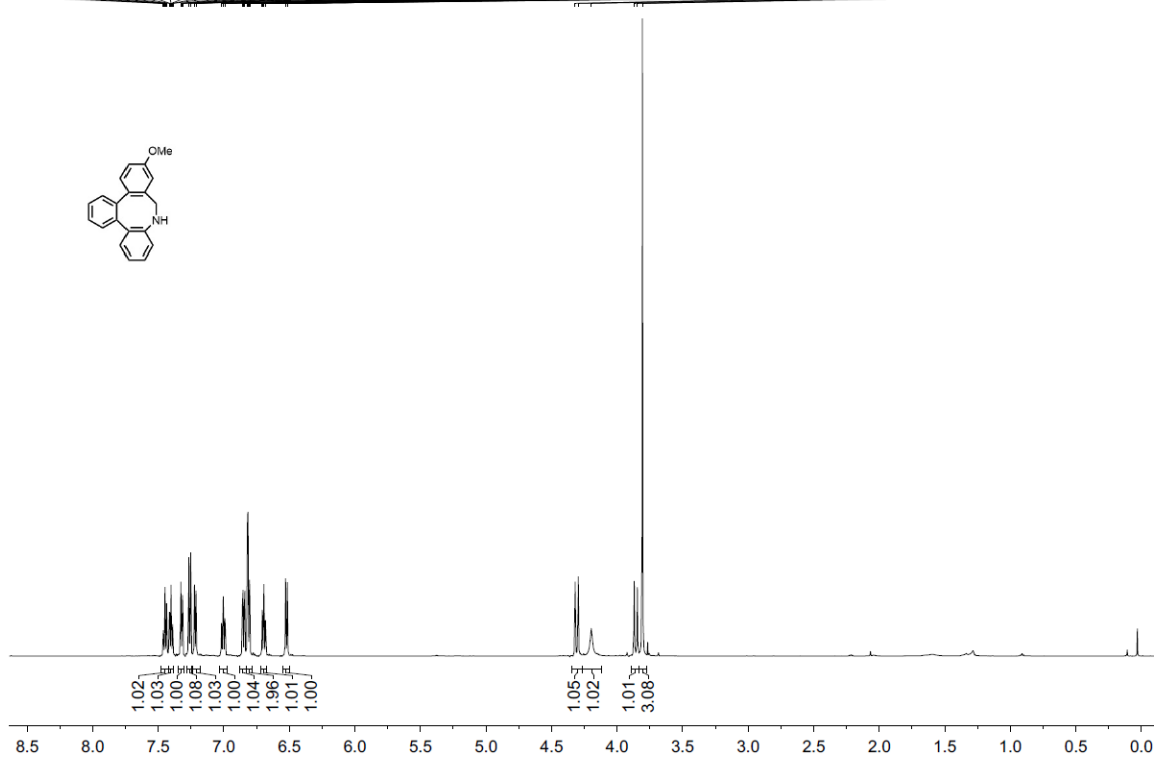

<sup>1</sup>H NMR (600 MHz, CDCl<sub>3</sub>)

159.35  
145.45  
142.64  
140.94  
137.99  
135.99  
133.83  
131.36  
129.13  
128.93  
128.87  
127.99  
127.89  
127.13  
118.67  
118.20  
113.55  
113.04

55.19  
49.46

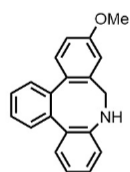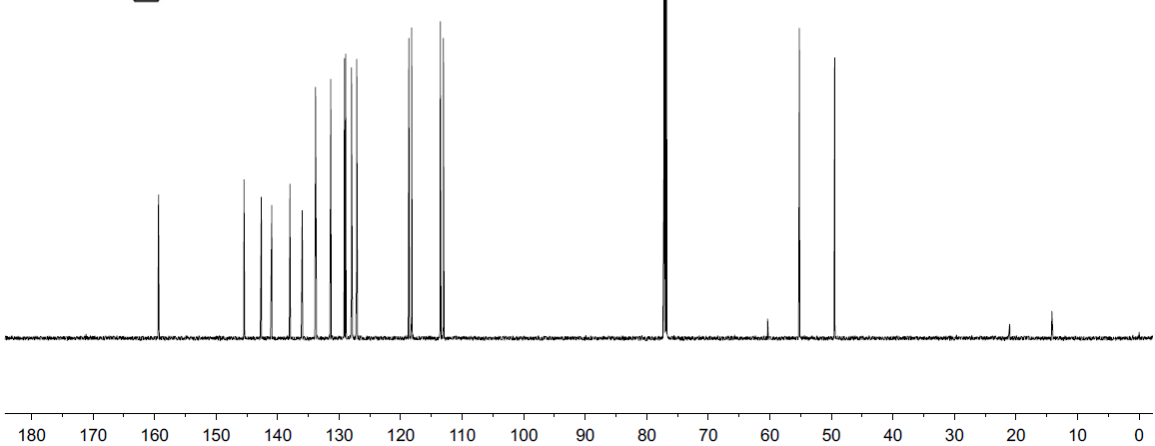

<sup>13</sup>C NMR (151 MHz, CDCl<sub>3</sub>)

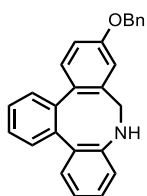

7.41  
7.40  
7.38  
7.38  
7.37  
7.37  
7.37  
7.36  
7.36  
7.35  
7.35  
7.35  
7.33  
7.32  
7.31  
7.29  
7.29  
7.28  
7.28  
7.23  
7.22  
7.21  
7.21  
7.18  
7.17  
6.98  
6.97  
6.95  
6.88  
6.88  
6.87  
6.87  
6.86  
6.86  
6.85  
6.78  
6.77  
6.67  
6.66  
6.65  
6.48  
6.46  
5.00  
4.27  
4.25  
3.80  
3.78

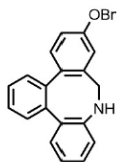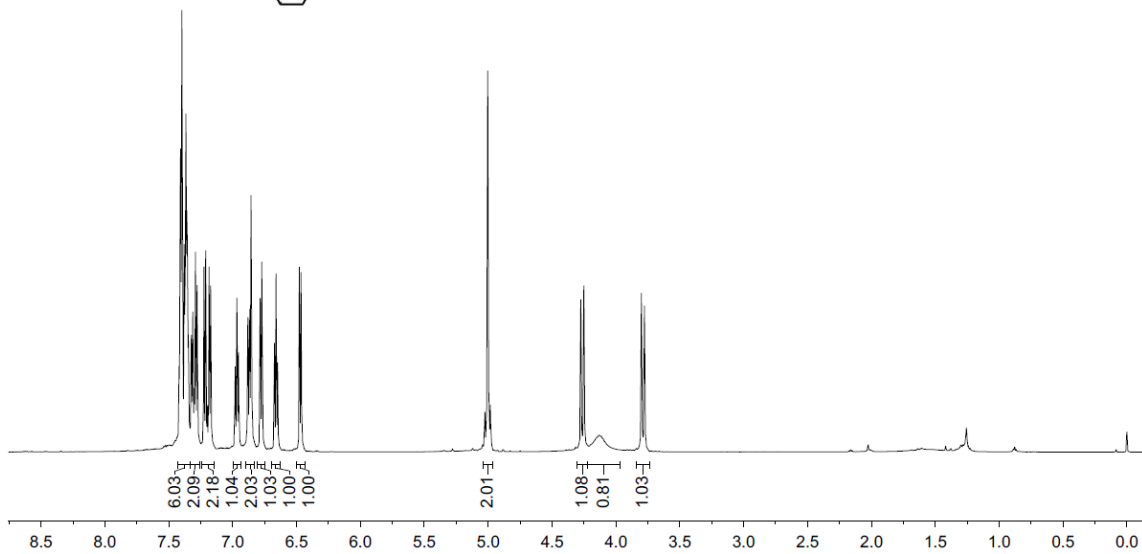

**<sup>1</sup>H NMR (600 MHz, CDCl<sub>3</sub>)**

158.61  
145.43  
142.62  
140.88  
138.02  
136.84  
136.24  
133.84  
131.36  
129.12  
128.94  
128.83  
128.54  
127.99  
127.96  
127.91  
127.51  
127.13  
118.66  
118.21  
114.48  
113.85

-69.99

-49.41

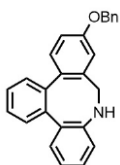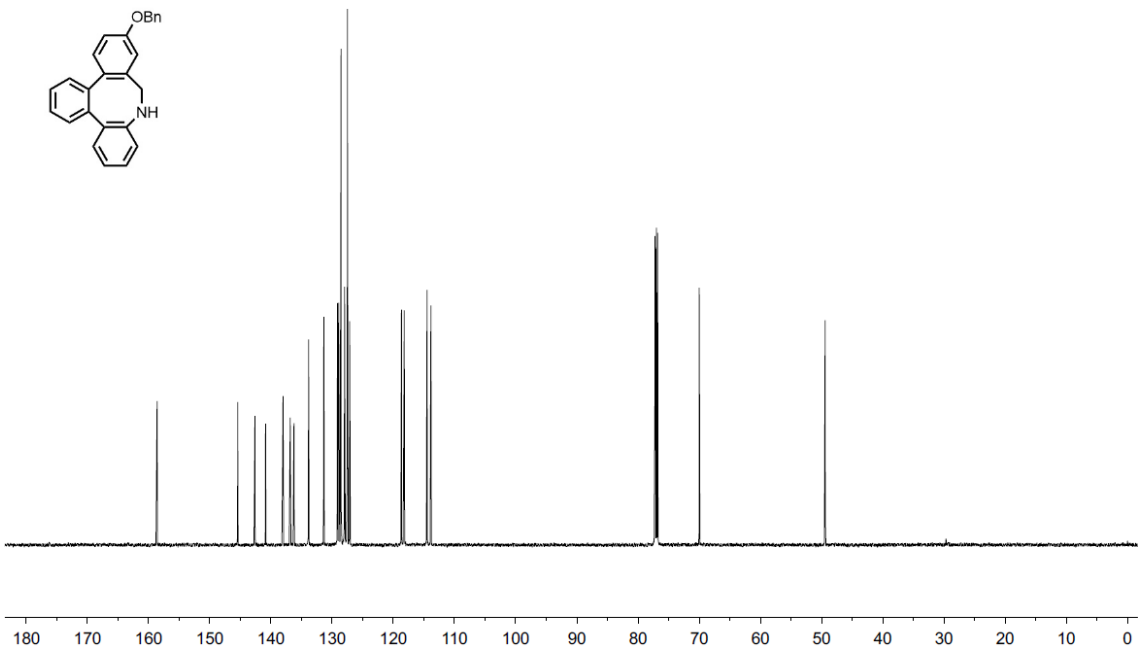

**<sup>13</sup>C NMR (151 MHz, CDCl<sub>3</sub>)**

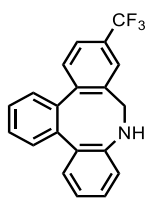

**3ae**

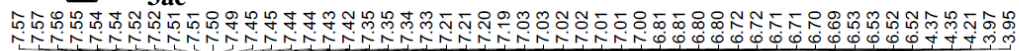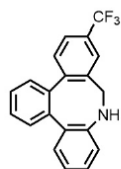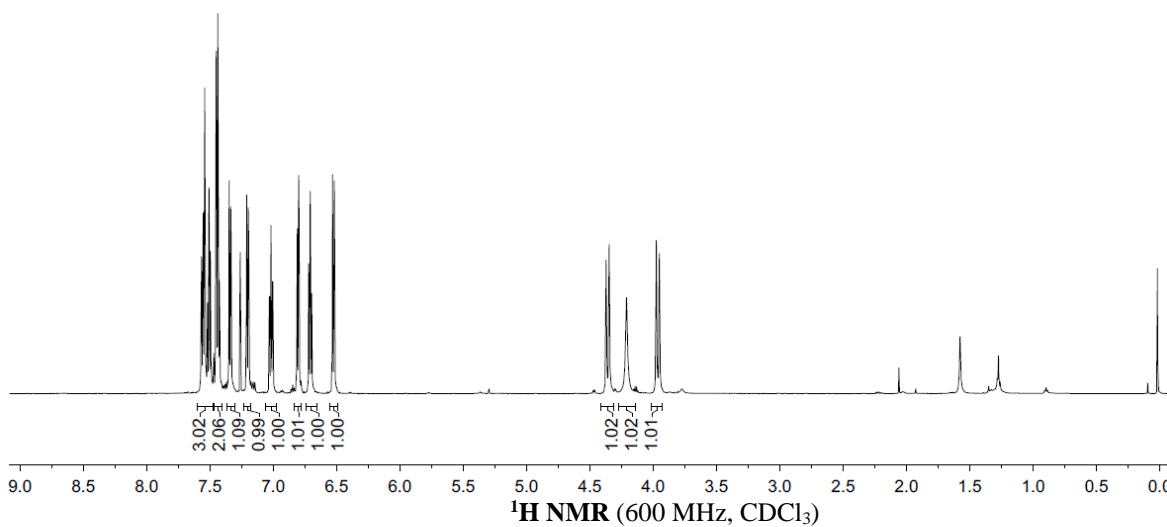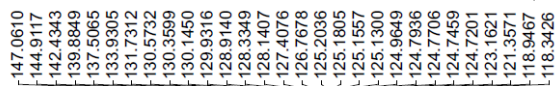

48.8884

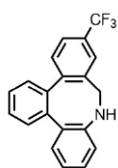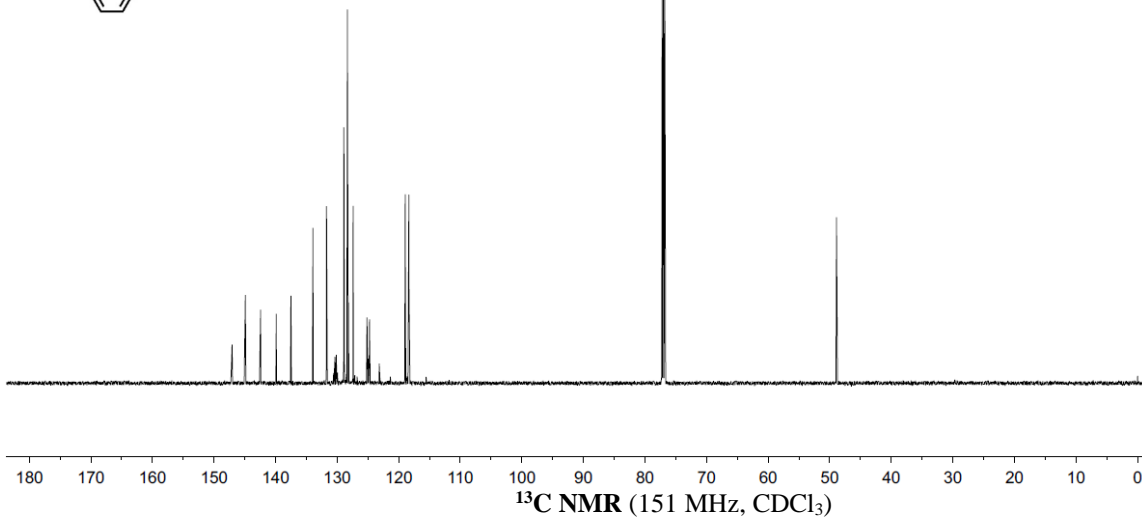

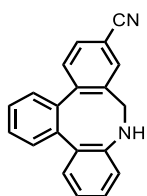

3af

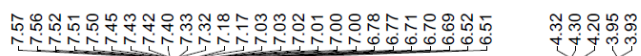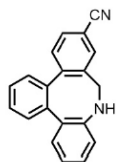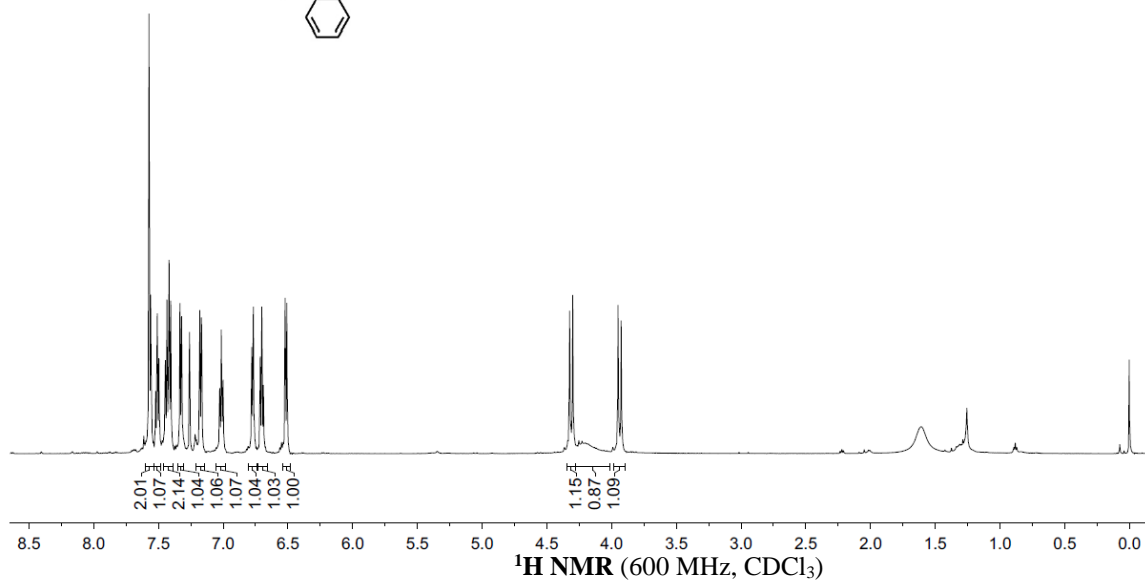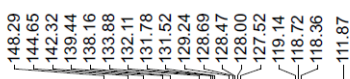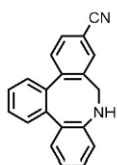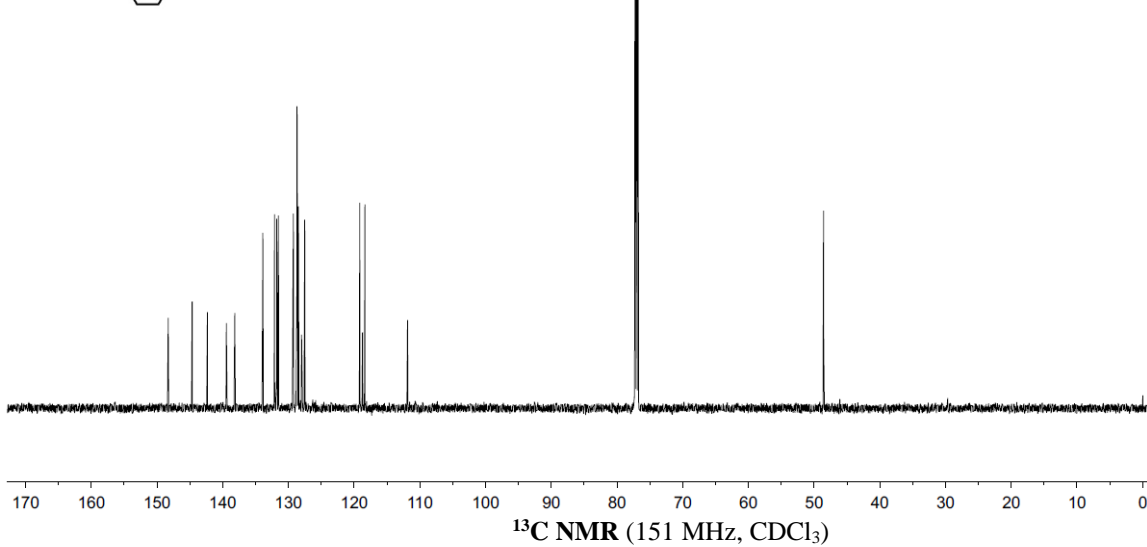

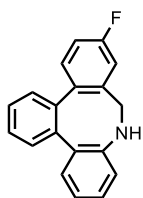

3ag

7.49  
7.48  
7.47  
7.47  
7.46  
7.46  
7.43  
7.42  
7.41  
7.41  
7.40  
7.40  
7.33  
7.33  
7.32  
7.32  
7.30  
7.29  
7.29  
7.29  
7.29  
7.28  
7.28  
7.28  
7.21  
7.21  
7.20  
7.19  
7.19  
7.03  
7.03  
7.02  
7.01  
7.01  
7.01  
7.00  
7.00  
6.99  
6.99  
6.99  
6.97  
6.97  
6.81  
6.81  
6.80  
6.80  
6.72  
6.72  
6.71  
6.71  
6.69  
6.69  
6.53  
6.53  
6.52  
6.51  
6.51  
4.31  
4.31  
4.28  
4.28  
3.88  
3.86

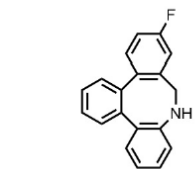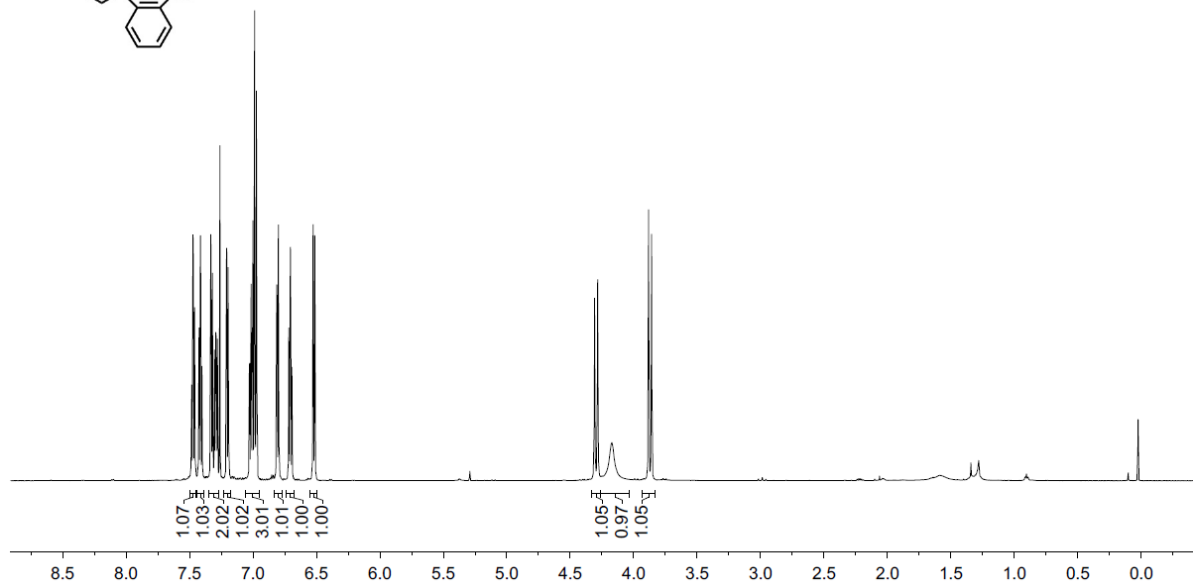

$^1\text{H}$  NMR (600 MHz,  $\text{CDCl}_3$ )

163.22  
161.58  
145.14  
142.58  
140.23  
139.37  
139.35  
138.78  
138.74  
133.81  
131.47  
129.47  
129.42  
129.06  
128.59  
128.35  
128.17  
127.28  
118.87  
118.22  
114.83  
114.77  
114.69  
114.64

-49.11

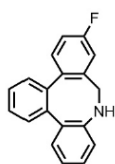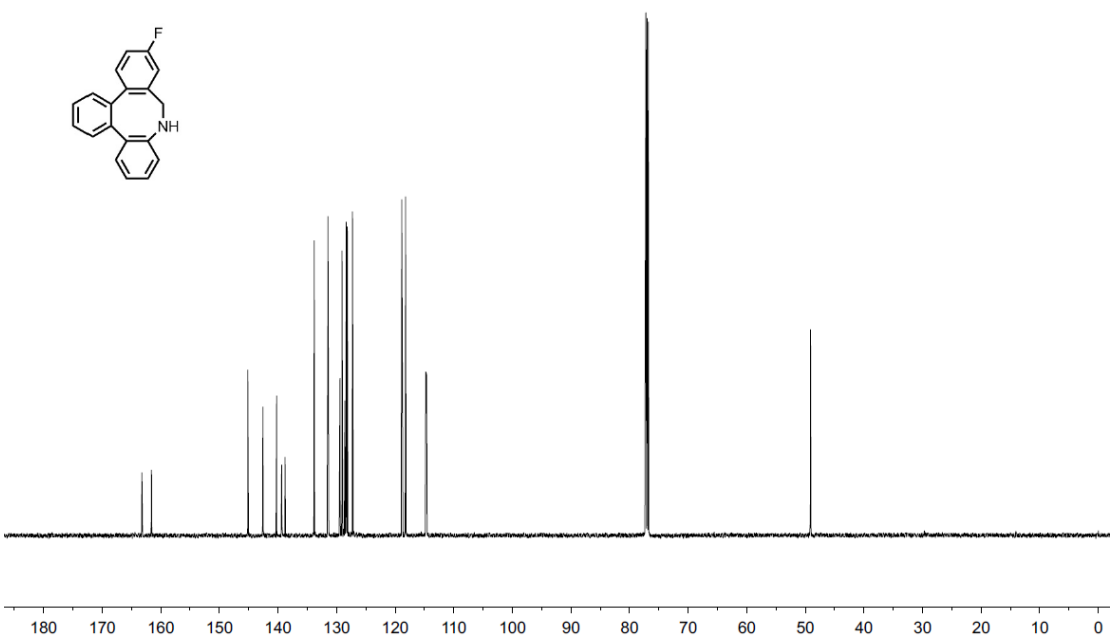

$^{13}\text{C}$  NMR (151 MHz,  $\text{CDCl}_3$ )

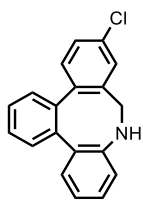

**3ah**

7.53  
7.52  
7.51  
7.51  
7.50  
7.50  
7.46  
7.46  
7.45  
7.45  
7.44  
7.44  
7.36  
7.36  
7.35  
7.35  
7.30  
7.23  
7.23  
7.22  
7.22  
7.07  
7.06  
7.06  
7.05  
7.05  
7.05  
7.04  
7.04  
6.84  
6.84  
6.83  
6.82  
6.75  
6.75  
6.74  
6.74  
6.73  
6.73  
6.56  
6.56  
6.55  
6.55  
4.33  
4.33  
4.21  
4.21  
3.92  
3.89

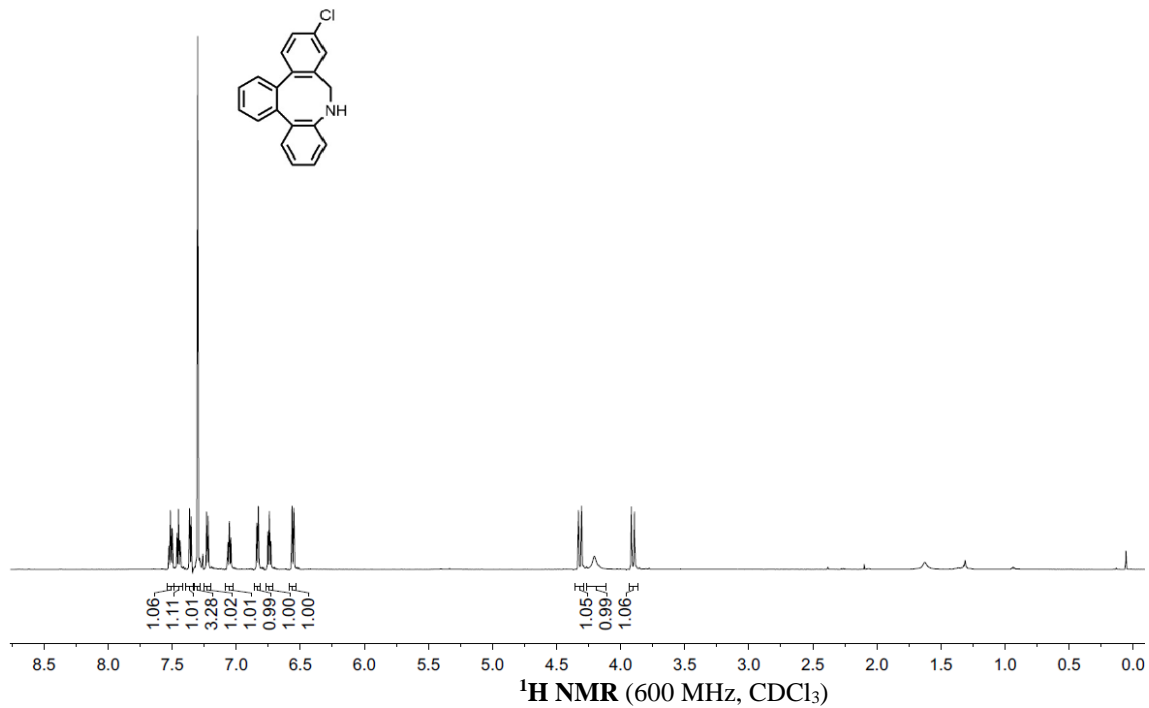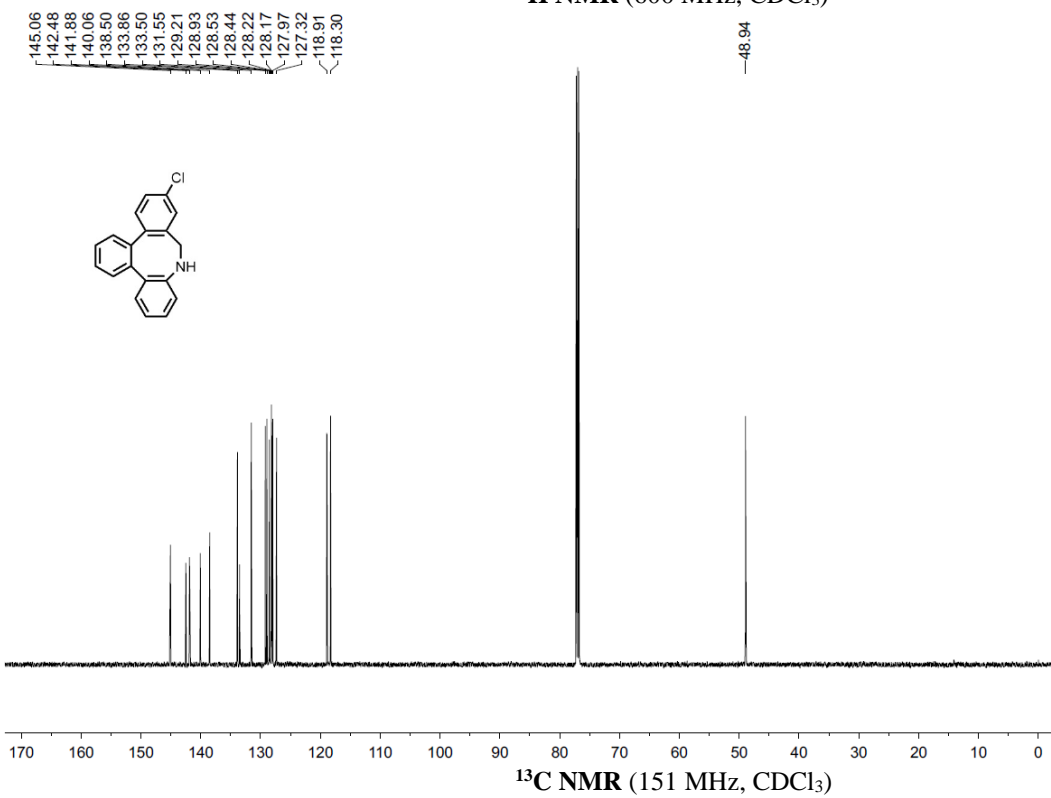

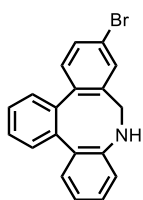

7.48  
7.48  
7.47  
7.46  
7.45  
7.45  
7.42  
7.42  
7.41  
7.41  
7.40  
7.40  
7.39  
7.39  
7.31  
7.31  
7.30  
7.30  
7.20  
7.20  
7.19  
7.18  
7.18  
7.17  
7.17  
7.16  
7.02  
7.02  
7.01  
7.01  
7.00  
7.00  
6.99  
6.79  
6.79  
6.78  
6.77  
6.71  
6.71  
6.69  
6.69  
6.68  
6.68  
6.52  
6.52  
6.51  
6.51  
4.28  
4.25  
4.16  
3.87  
3.85

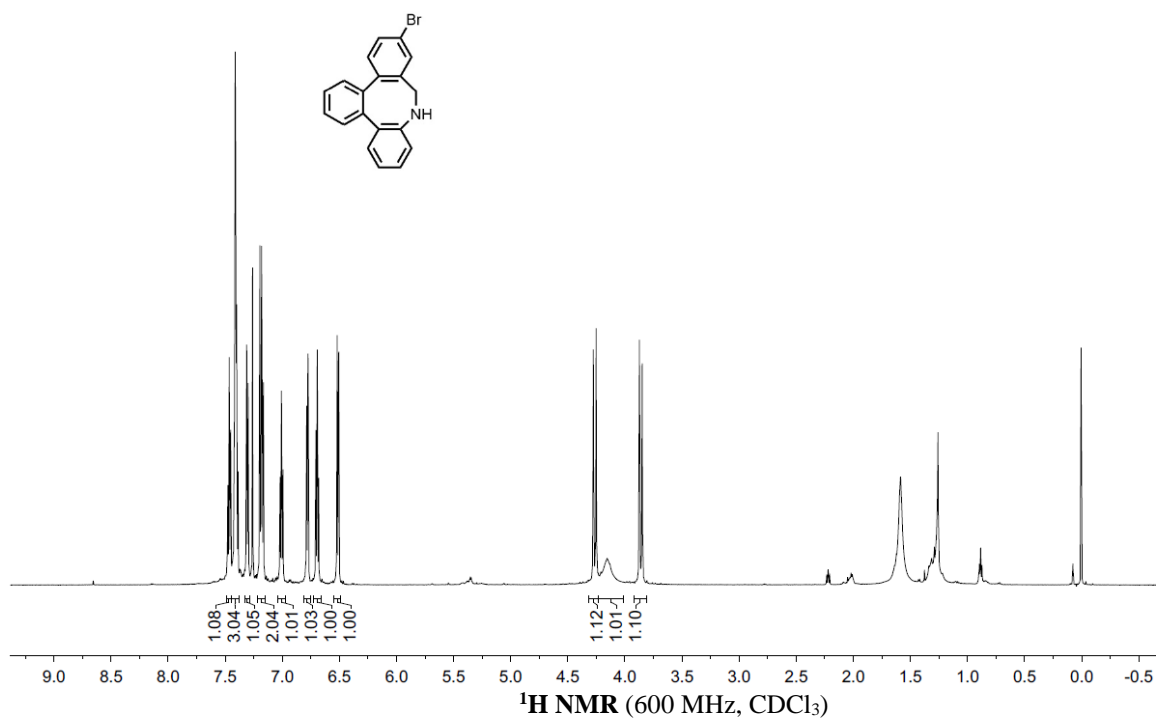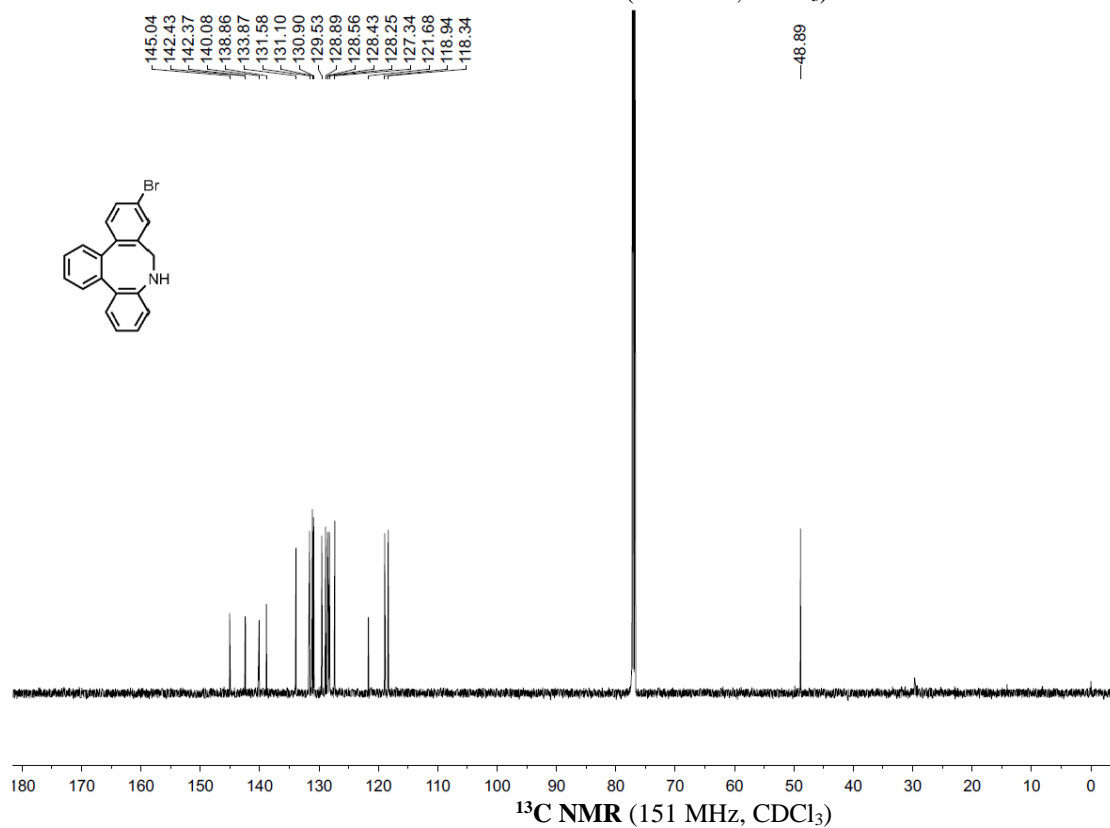

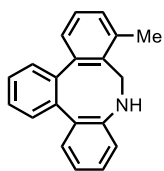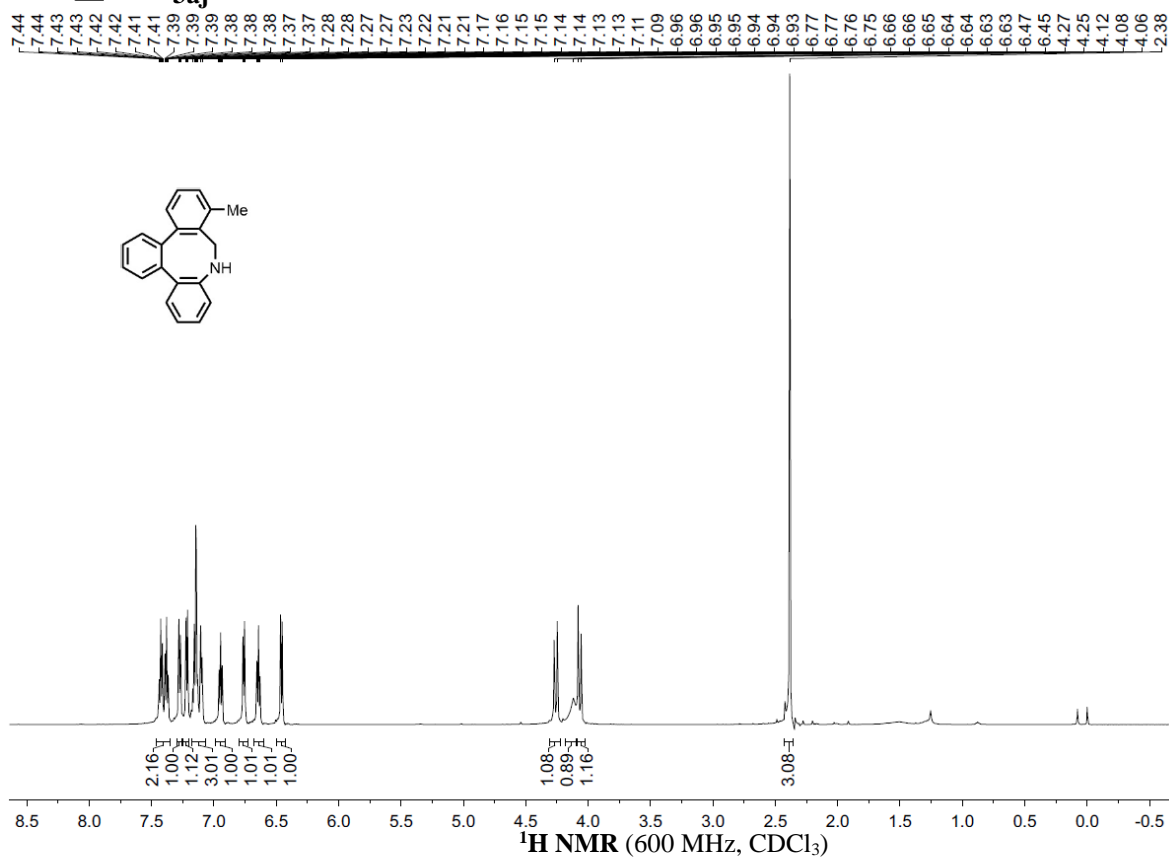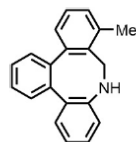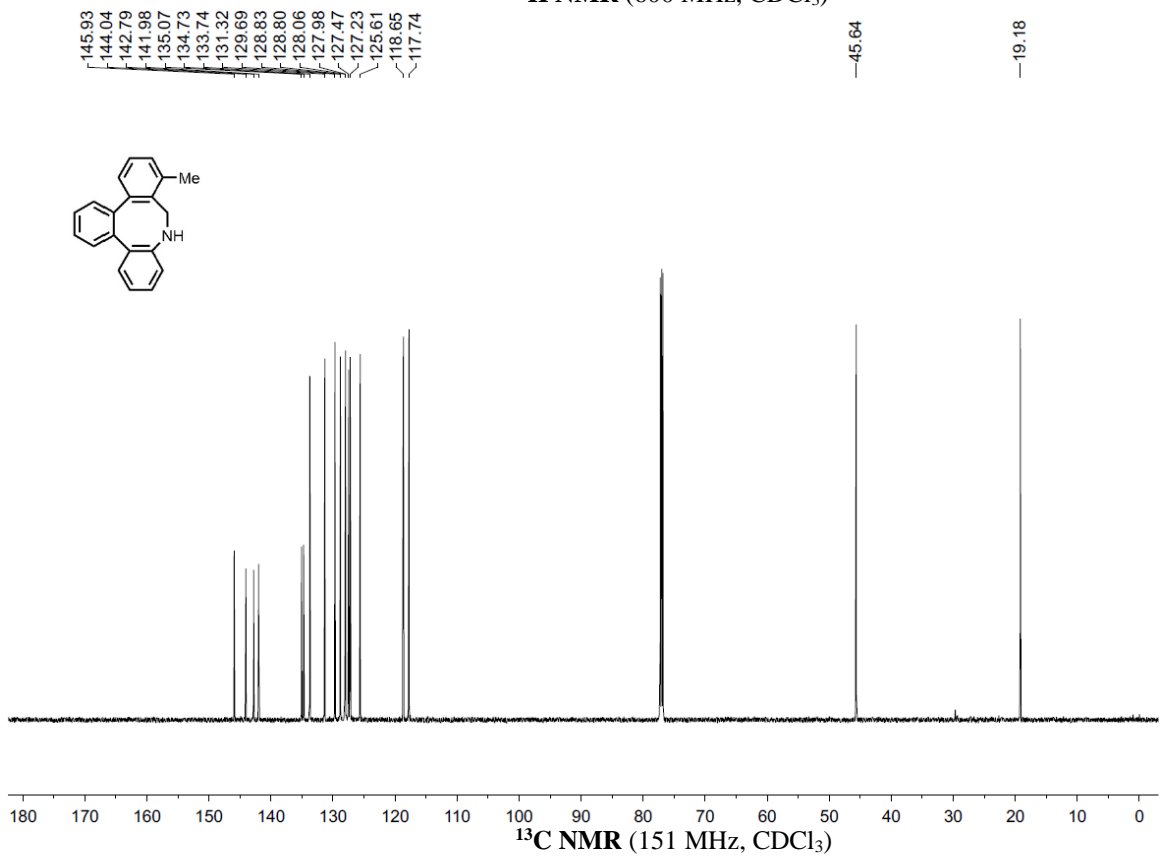



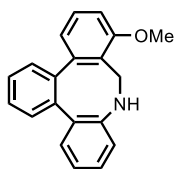

**3ak**

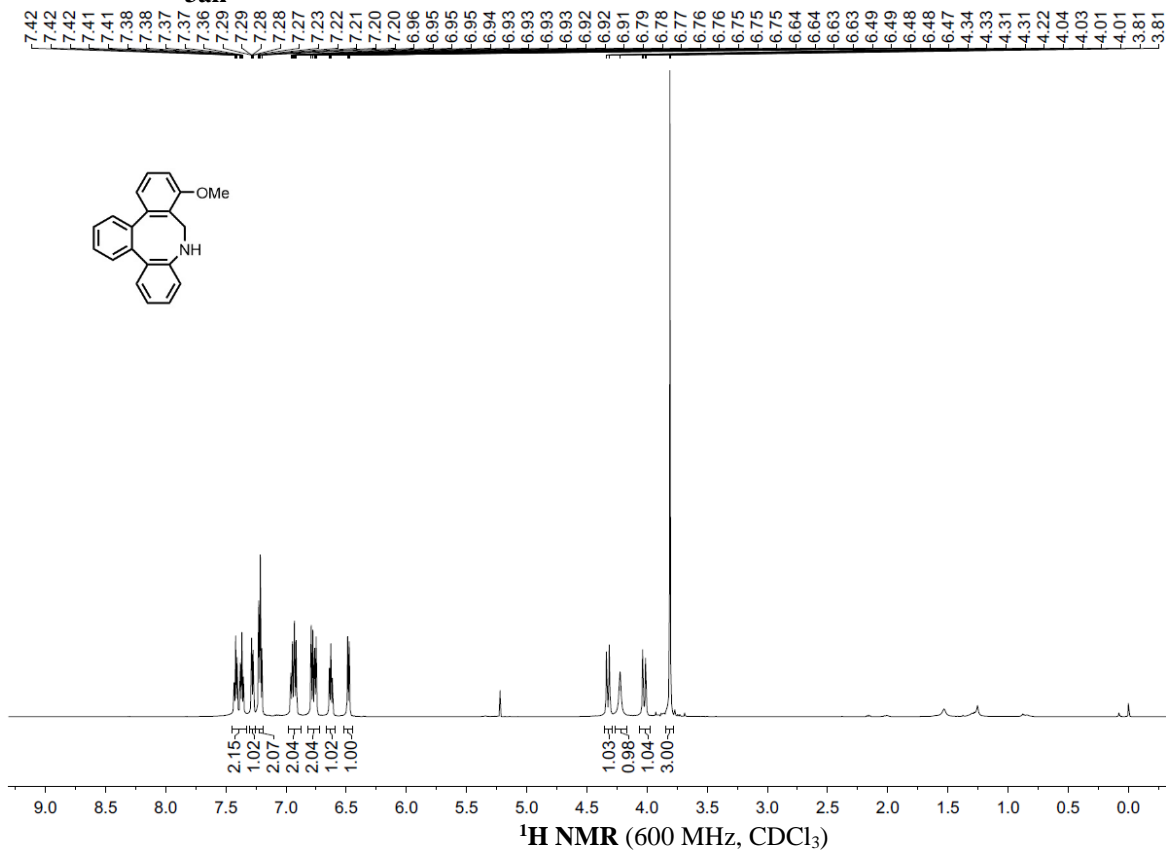

<sup>13</sup>C NMR (151 MHz, CDCl<sub>3</sub>) spectrum of 3ak. The x-axis ranges from 180 to 0 ppm.

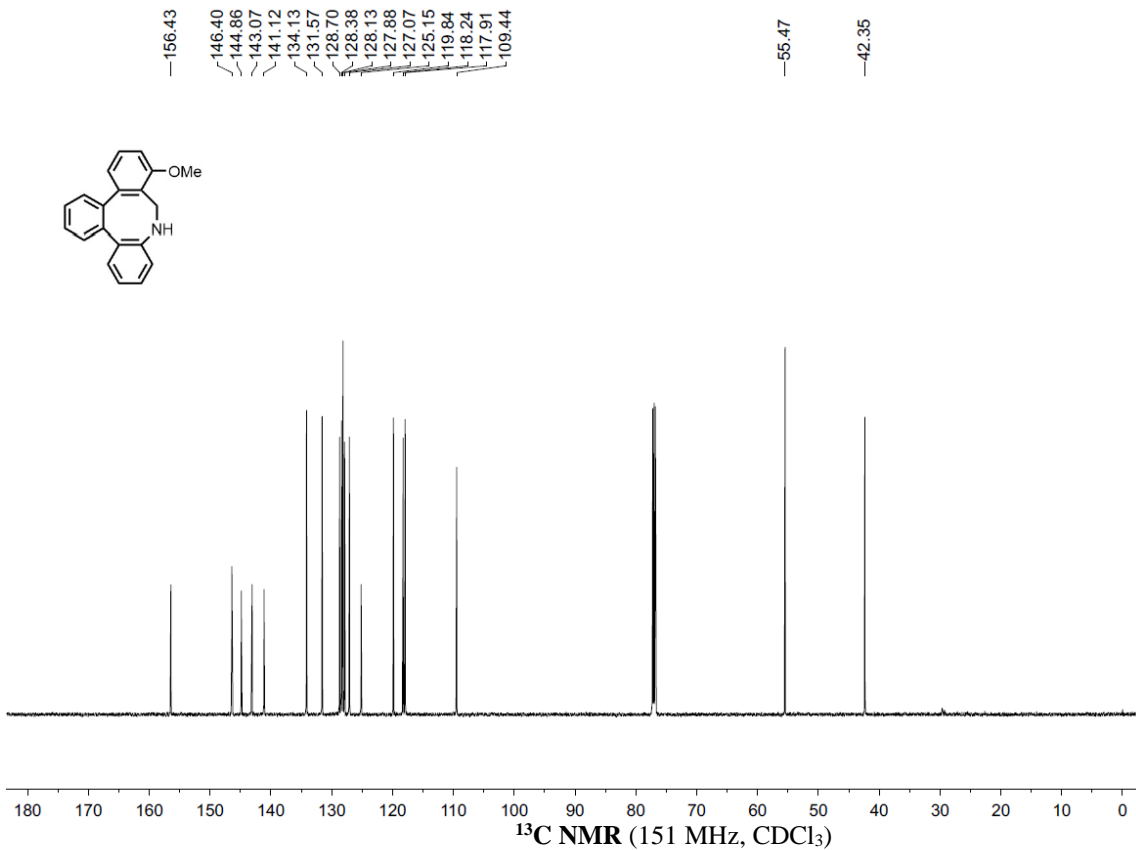

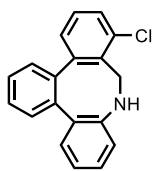

**3al**

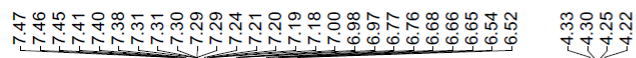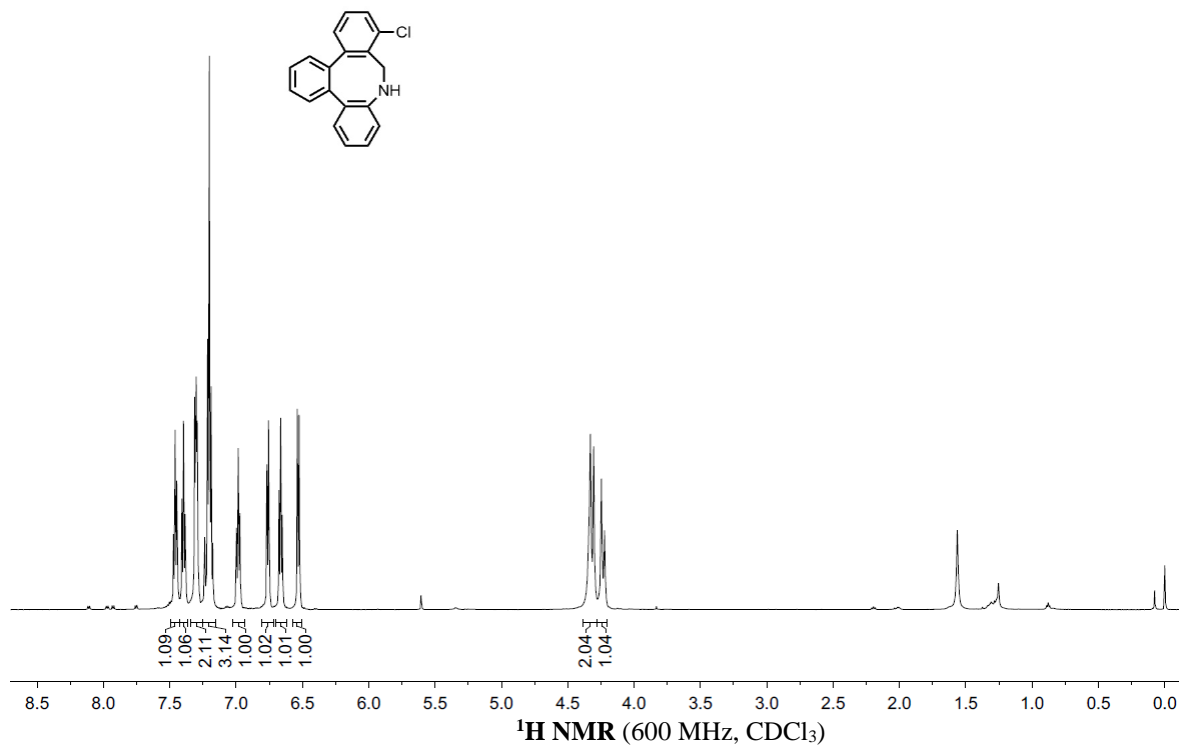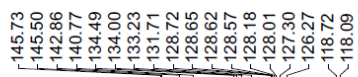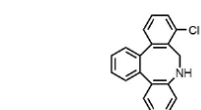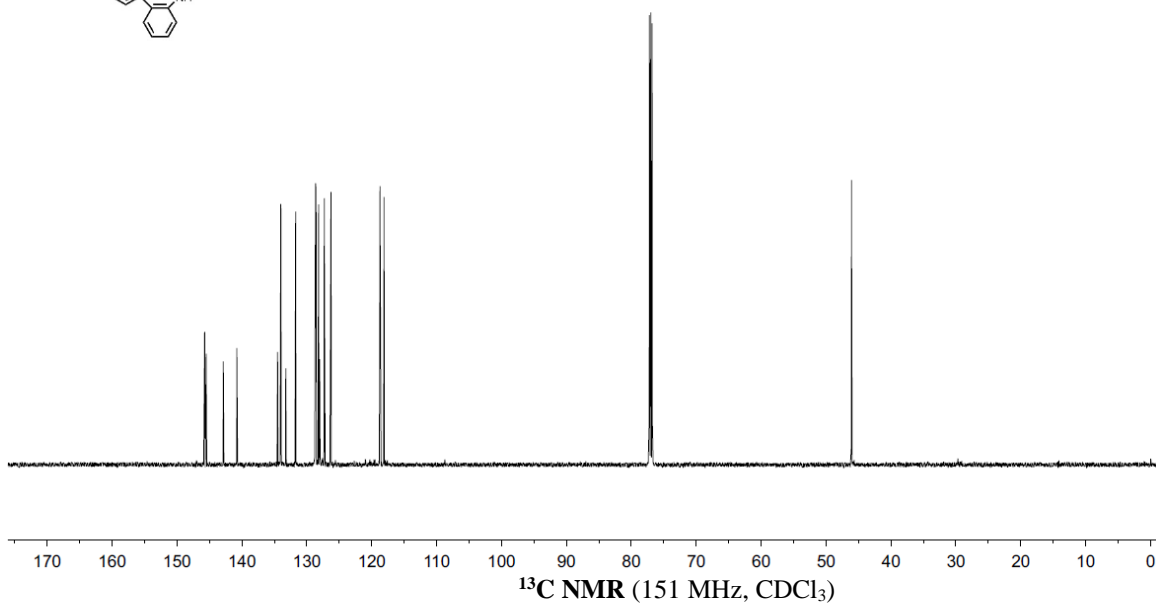

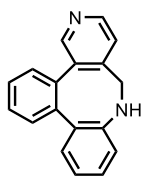

**3am**

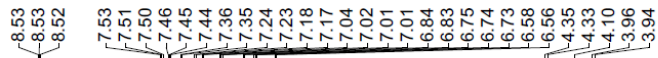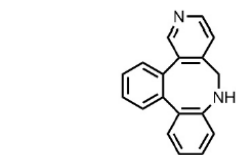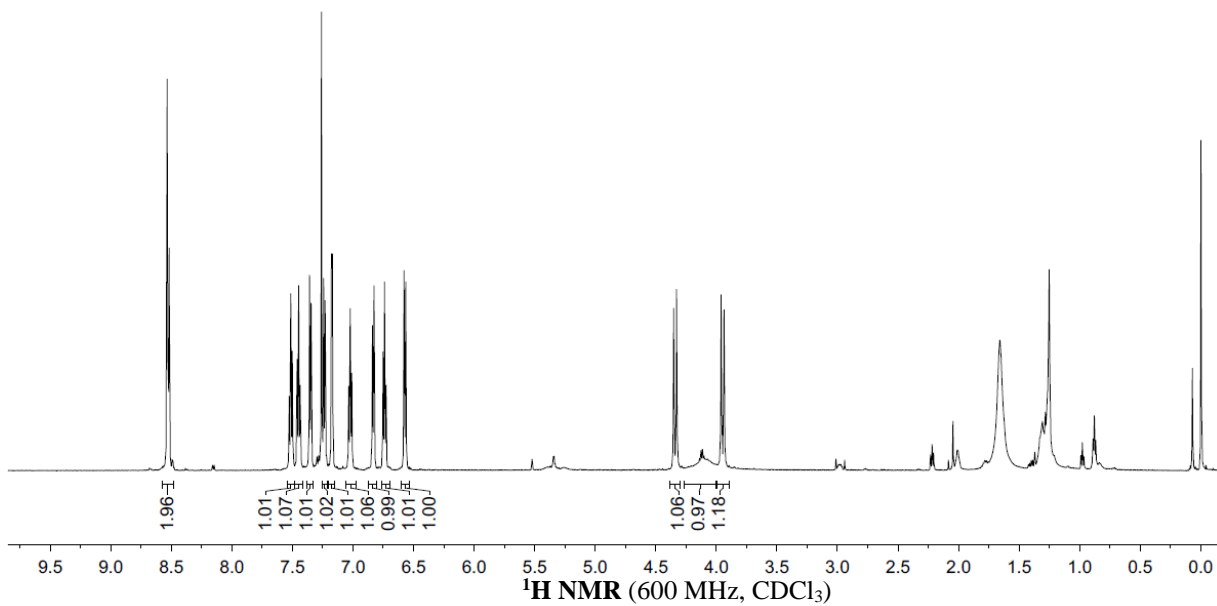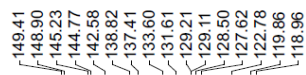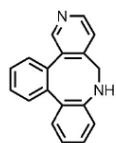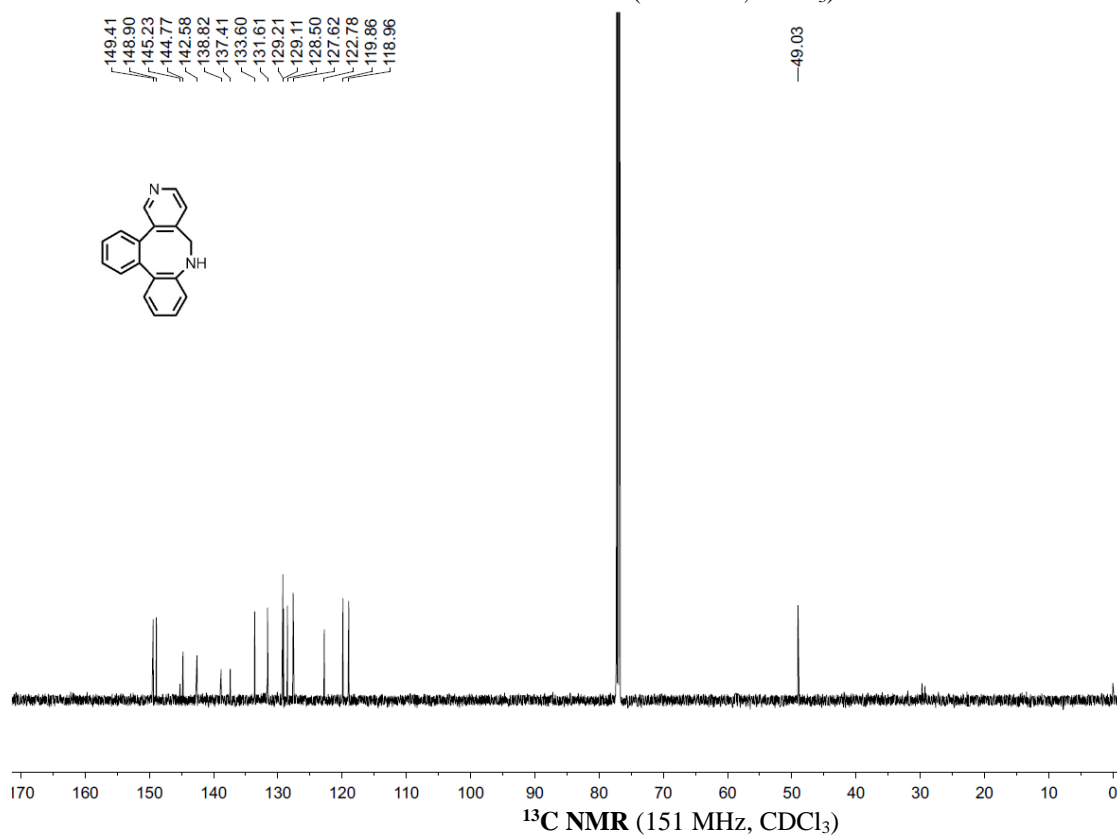

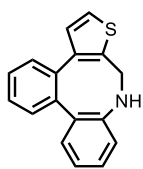

**3an**

7.47  
7.46  
7.46  
7.45  
7.45  
7.44  
7.43  
7.43  
7.42  
7.42  
7.40  
7.40  
7.38  
7.37  
7.36  
7.36  
7.34  
7.34  
7.22  
7.22  
7.20  
7.20  
7.18  
7.18  
7.10  
7.09  
7.08  
7.08  
7.06  
7.06  
7.00  
7.00  
6.98  
6.98  
6.98  
6.97  
6.96  
6.95  
6.94  
6.93  
6.86  
6.85  
4.56  
4.52  
4.39  
4.35  
3.81

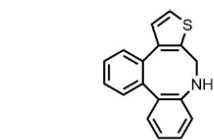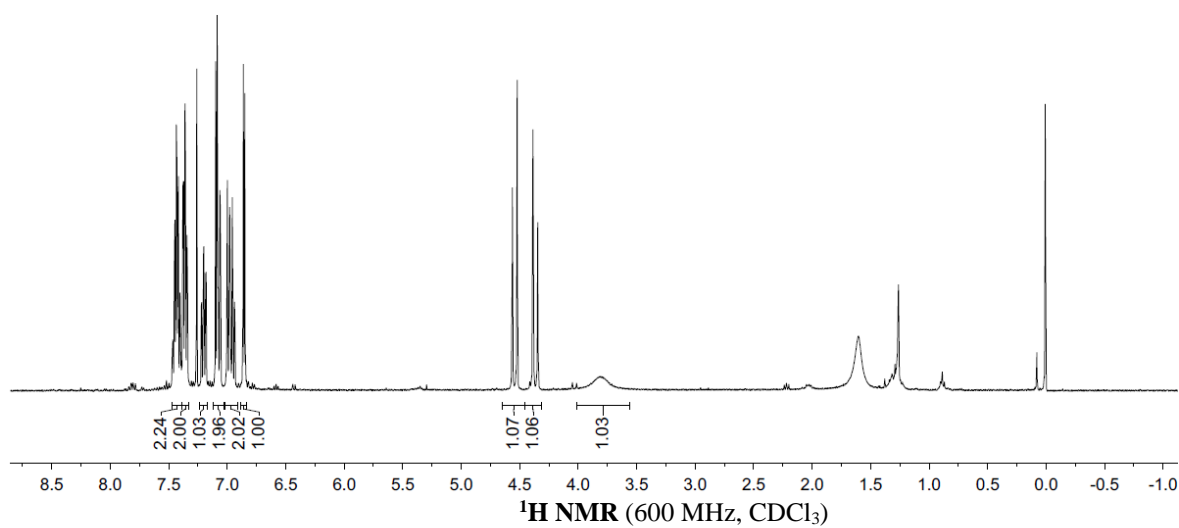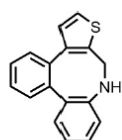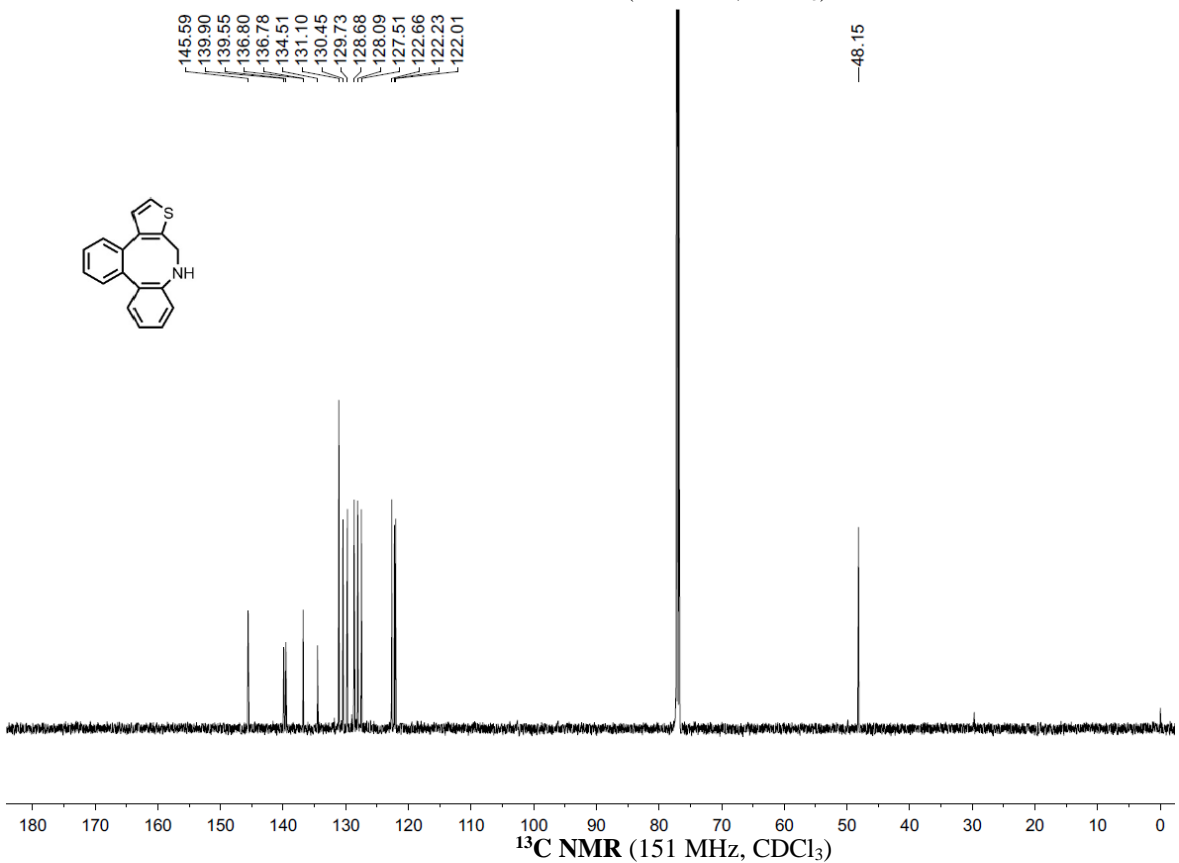

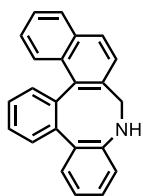

**3ao**

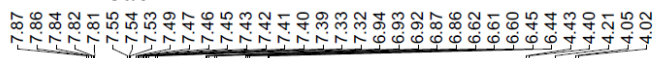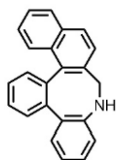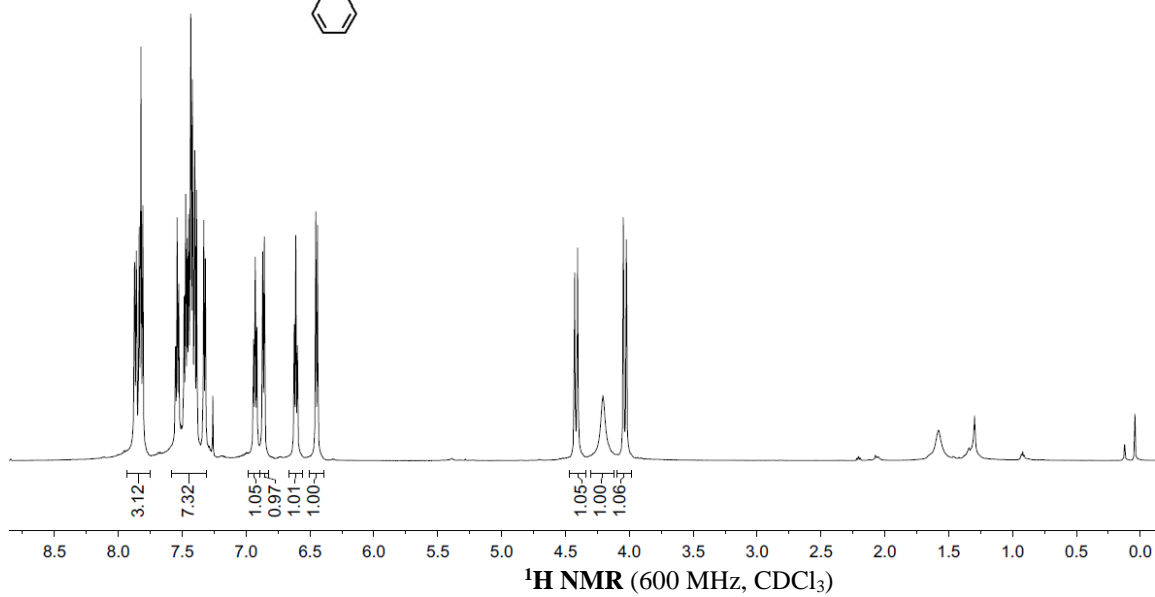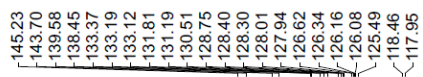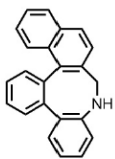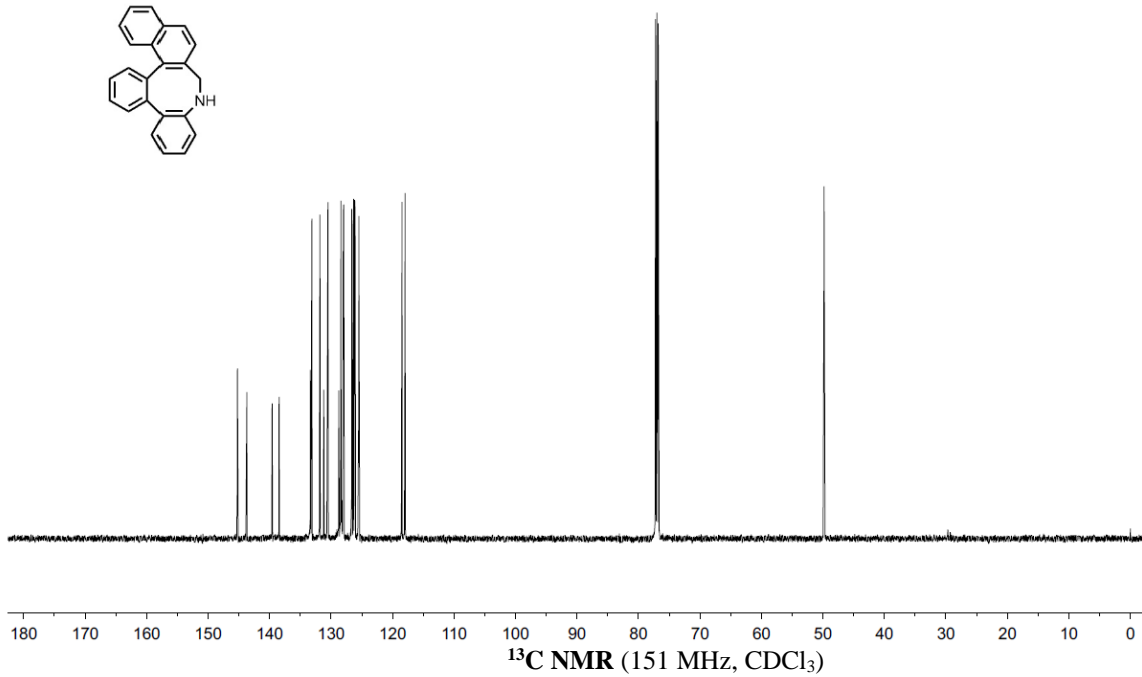

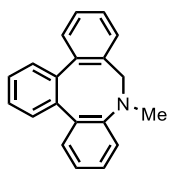

**3ap**

7.44  
7.44  
7.43  
7.42  
7.41  
7.41  
7.40  
7.39  
7.39  
7.38  
7.38  
7.29  
7.29  
7.28  
7.28  
7.28  
7.28  
7.28  
7.27  
7.27  
7.26  
7.26  
7.25  
7.24  
7.24  
7.23  
7.23  
7.22  
7.22  
7.21  
7.21  
7.20  
7.20  
7.10  
7.10  
7.09  
7.09  
7.09  
7.08  
7.07  
7.07  
6.76  
6.76  
6.74  
6.74  
6.73  
6.73  
6.71  
6.71  
6.70  
6.70  
4.53  
4.51  
3.88  
3.86  
3.04

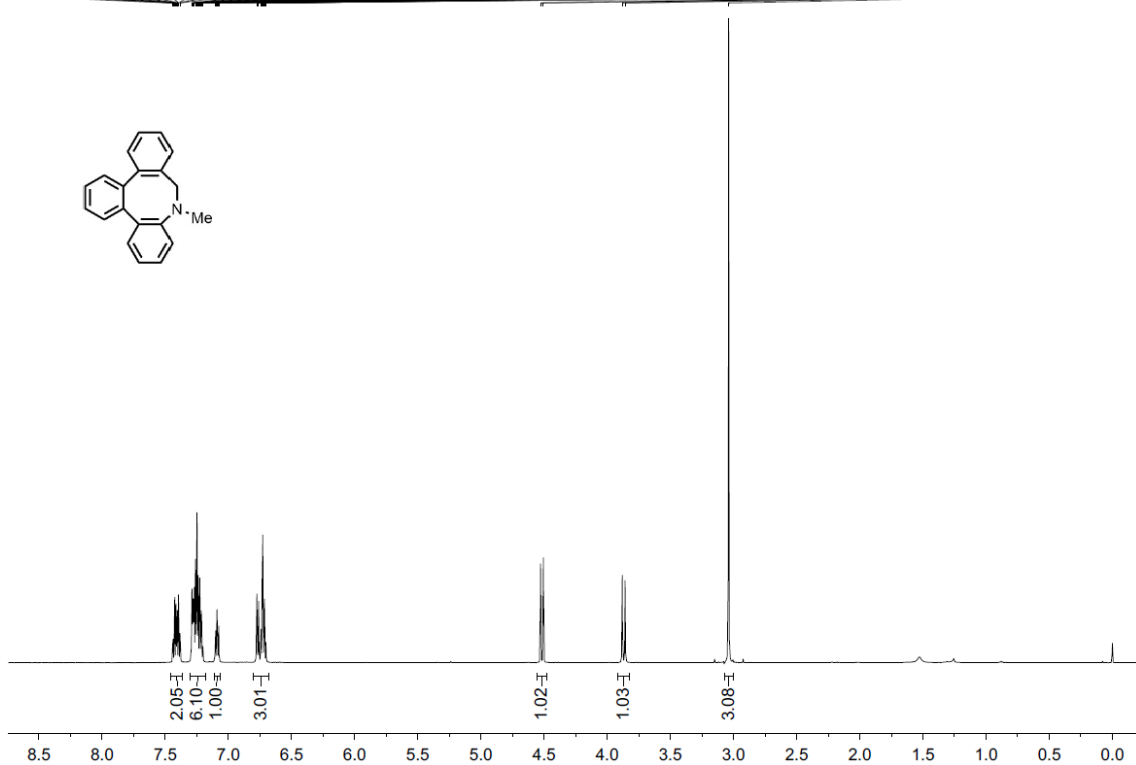

148.47  
143.57  
143.16  
141.02  
135.72  
133.53  
132.85  
130.60  
129.08  
128.15  
127.86  
127.78  
127.70  
127.58  
127.11  
119.57  
118.64

-58.81

-44.09

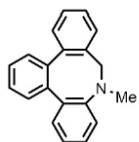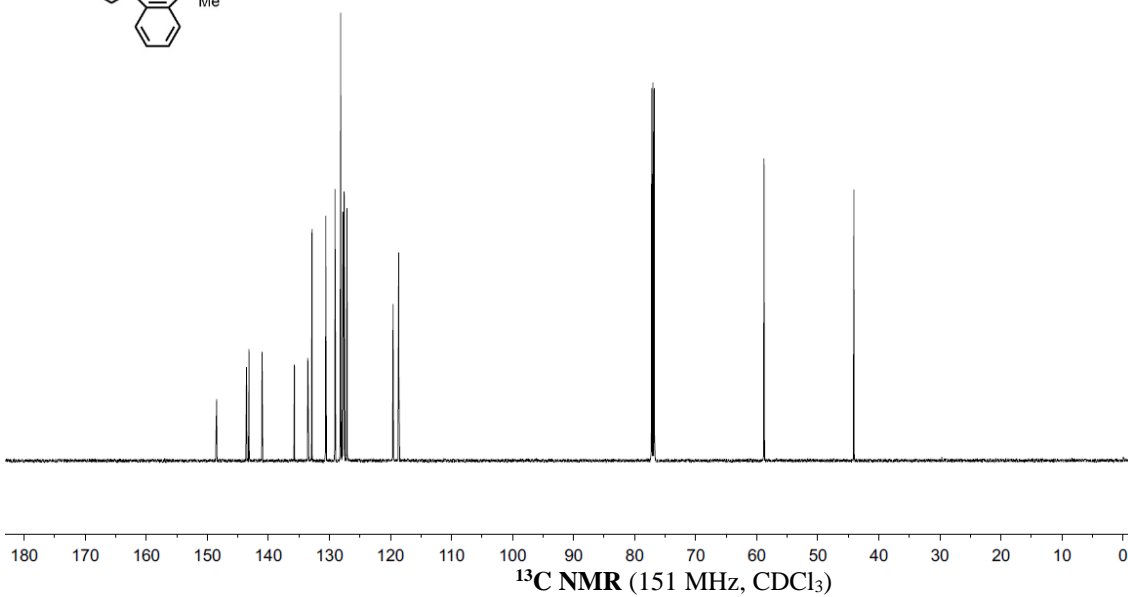

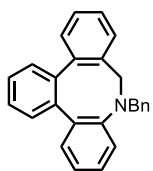

**3aq**

7.42  
7.41  
7.41  
7.40  
7.29  
7.28  
7.27  
7.26  
7.25  
7.24  
7.23  
7.22  
7.21  
7.21  
7.20  
7.20  
7.19  
7.19  
7.18  
7.17  
7.17  
7.10  
7.10  
7.09  
7.01  
6.99  
6.81  
6.80  
4.45  
4.44  
4.27  
4.25  
3.83

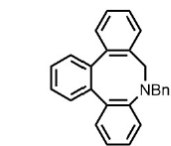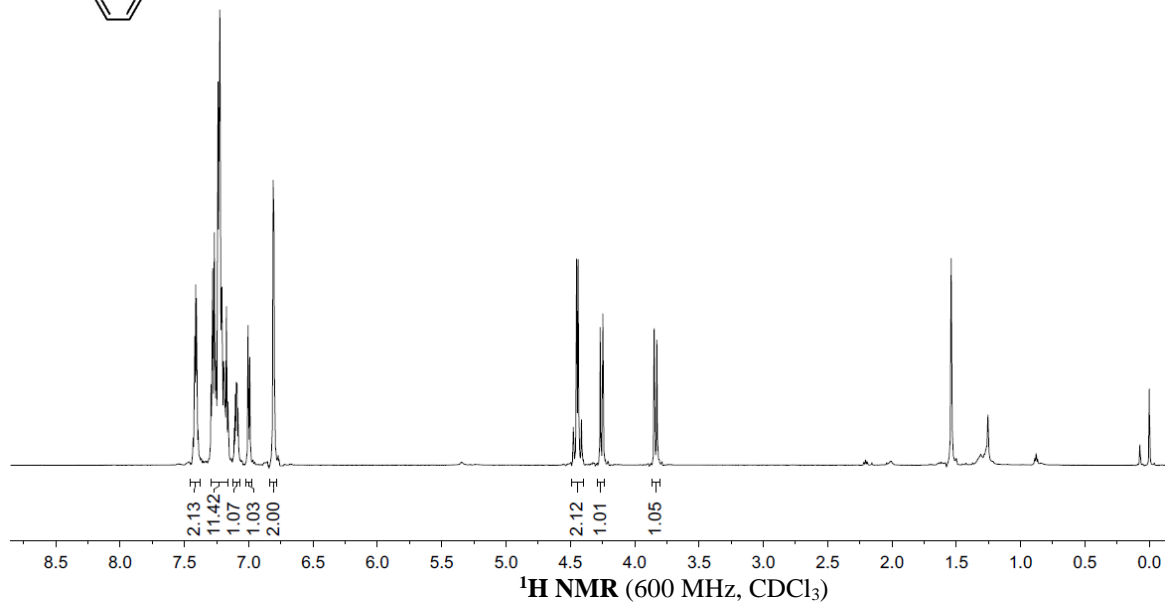

148.37  
143.08  
142.60  
141.12  
139.46  
136.21  
136.09  
131.91  
130.35  
129.54  
128.30  
128.24  
128.16  
128.14  
127.79  
127.56  
127.54  
127.53  
127.11  
126.90  
122.35  
121.30

61.25  
56.09

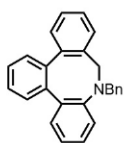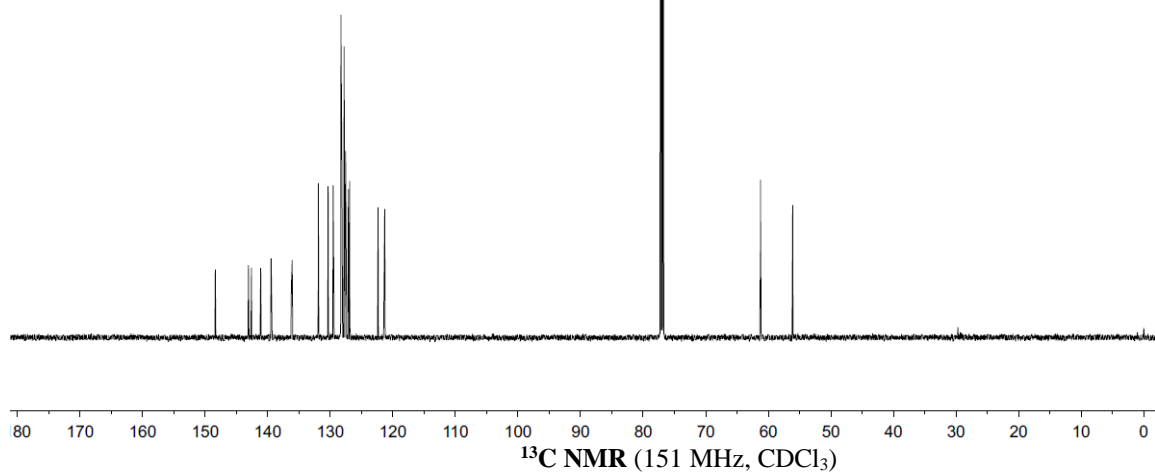

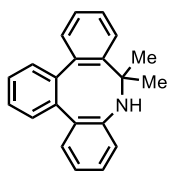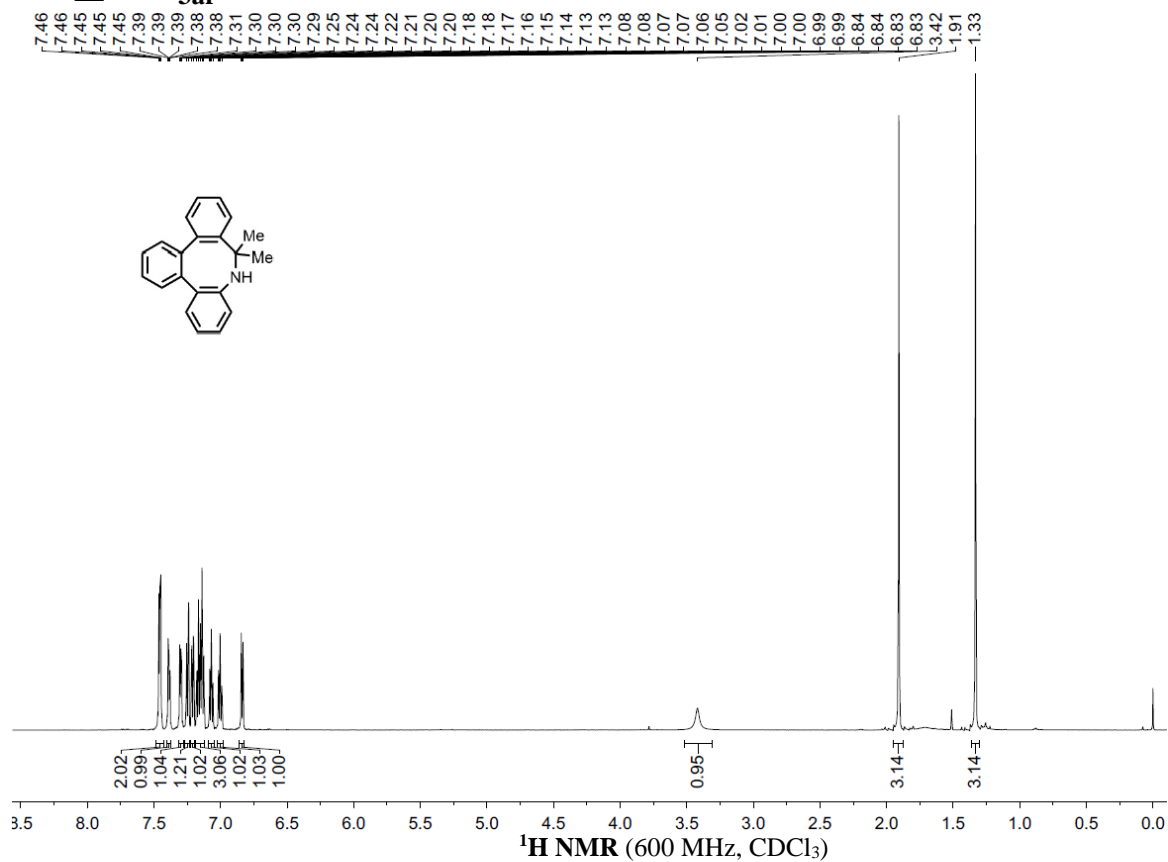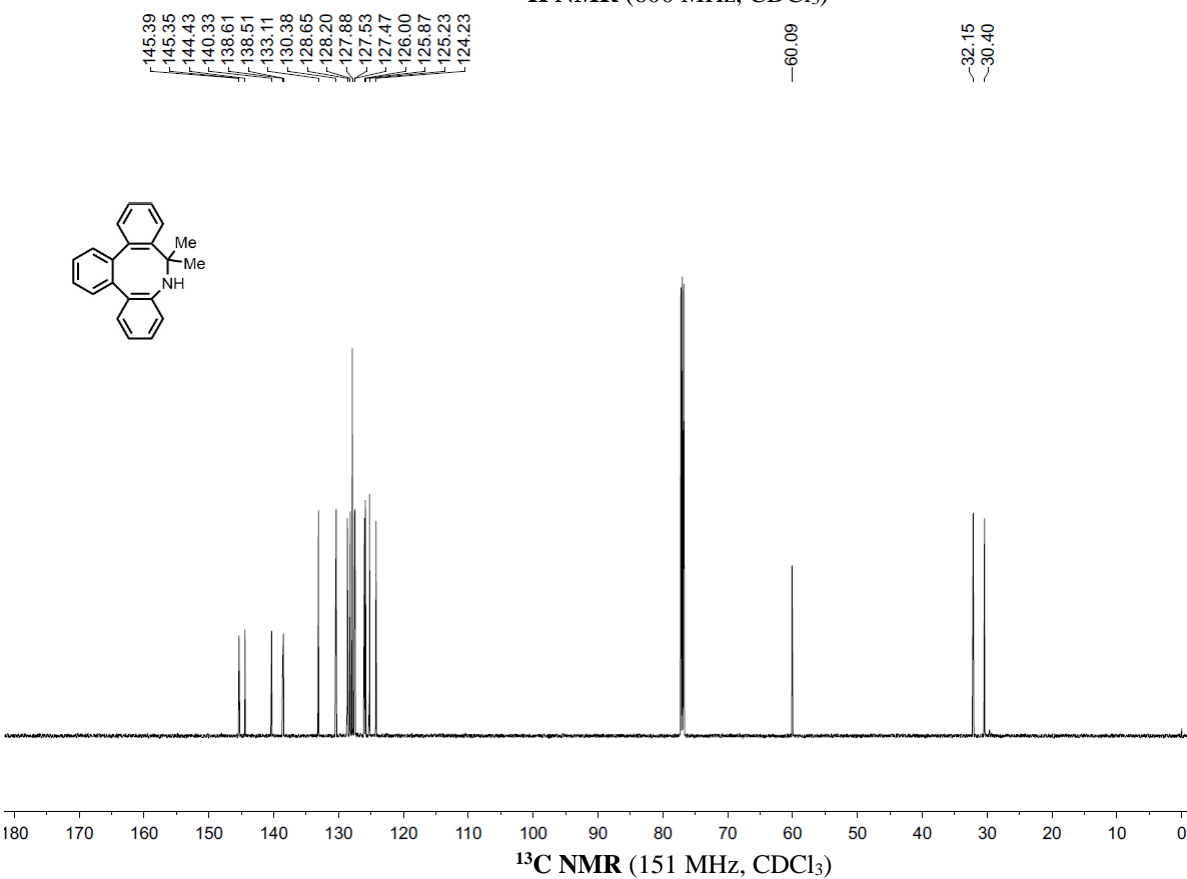



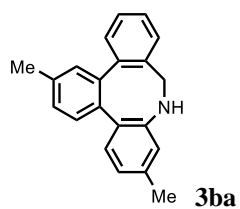

7.30  
 7.29  
 7.28  
 7.28  
 7.27  
 7.27  
 7.25  
 7.24  
 7.18  
 7.17  
 7.07  
 6.66  
 6.47  
 6.46  
 6.28

4.33  
 4.31  
 4.11  
 3.87  
 3.85

-2.41  
 -2.15

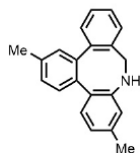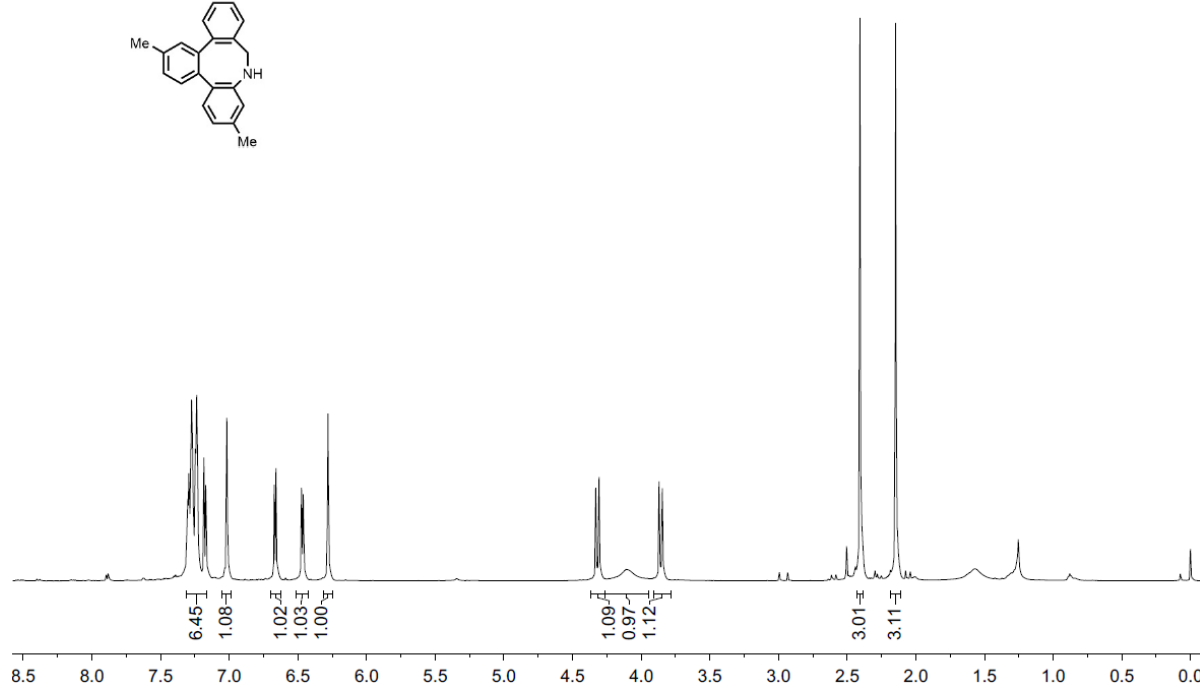

$^1\text{H}$  NMR (600 MHz,  $\text{CDCl}_3$ )

145.26  
 143.64  
 141.09  
 139.70  
 137.58  
 136.91  
 136.65  
 133.92  
 131.39  
 129.90  
 128.84  
 128.11  
 128.01  
 127.83  
 127.76  
 125.77  
 119.72  
 118.61

-49.13

21.00  
20.84

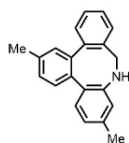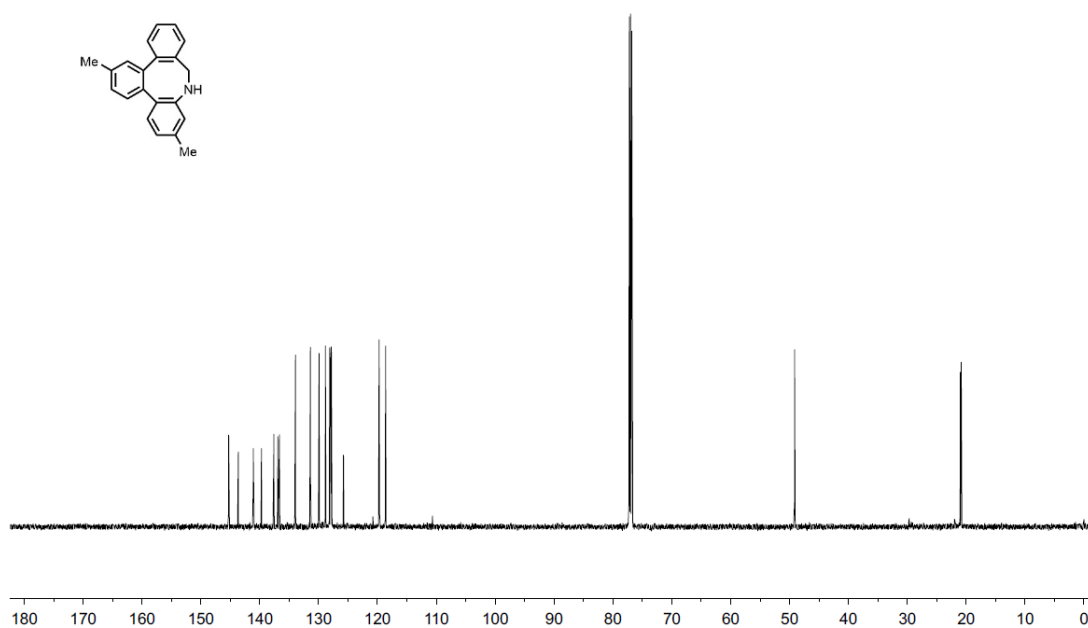

$^{13}\text{C}$  NMR (151 MHz,  $\text{CDCl}_3$ )

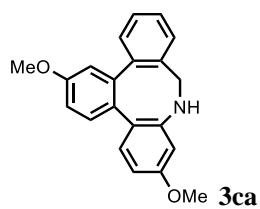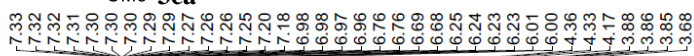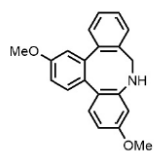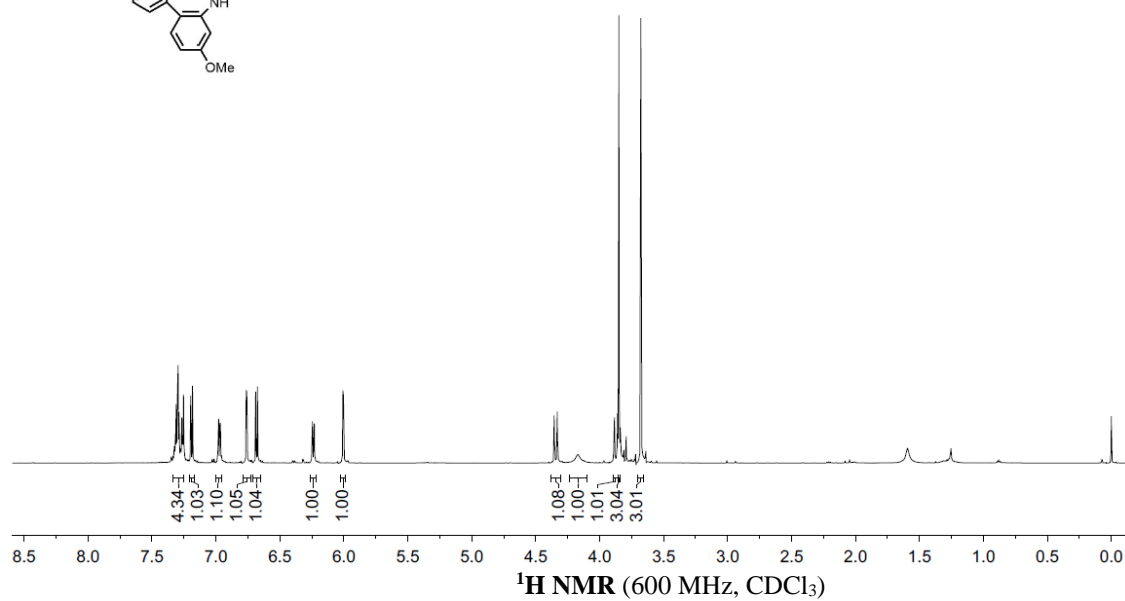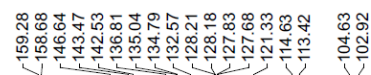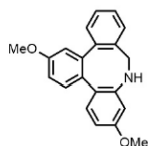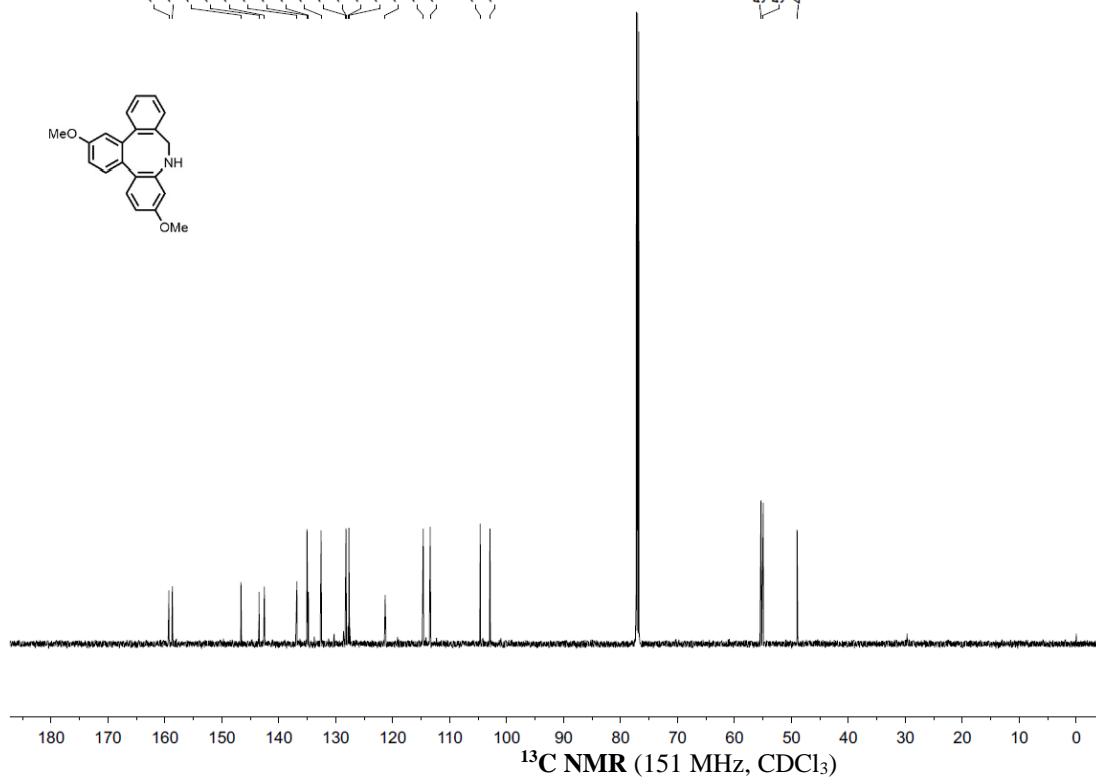

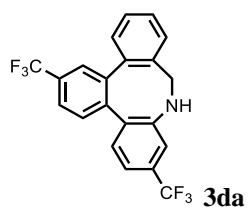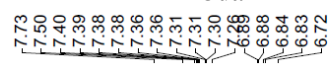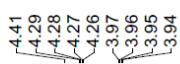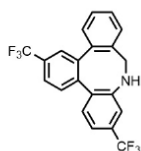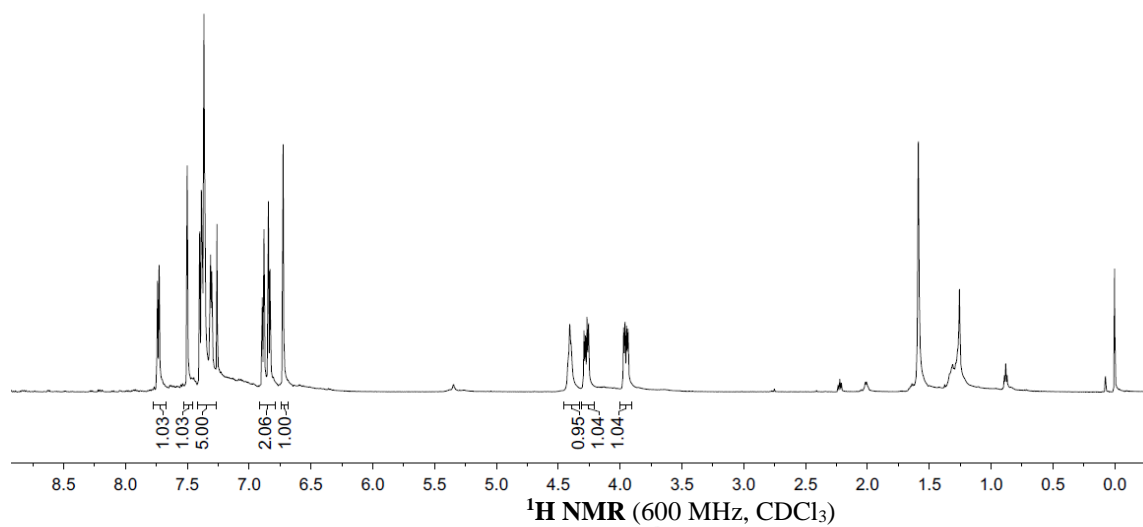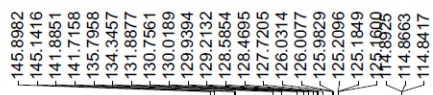

48.6770

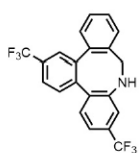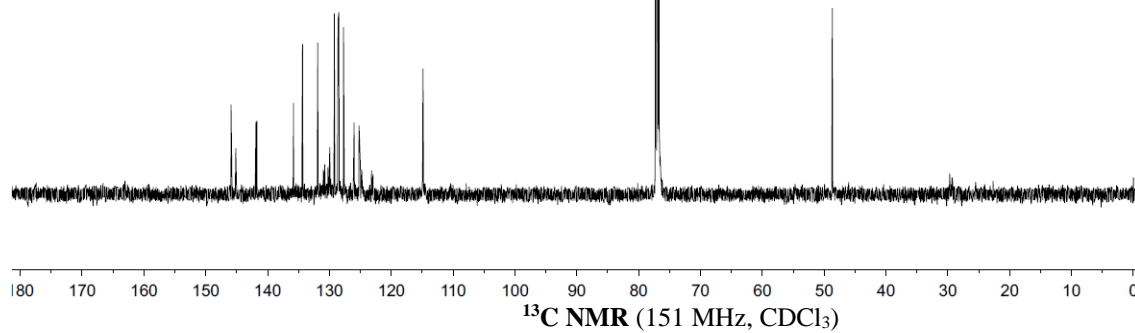

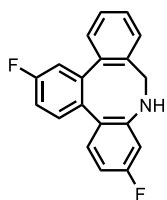

7.36  
7.35  
7.34  
7.34  
7.34  
7.33  
7.33  
7.33  
7.32  
7.32  
7.32  
7.31  
7.31  
7.31  
7.30  
7.30  
7.28  
7.28  
7.27  
7.27  
7.27  
7.23  
7.22  
7.22  
7.21  
7.21  
7.16  
7.15  
7.14  
7.14  
7.13  
7.12  
6.96  
6.95  
6.94  
6.94  
6.69  
6.68  
6.68  
6.67  
6.67  
6.37  
6.36  
6.35  
6.34  
6.34  
6.19  
6.18  
6.17  
6.17  
4.31  
4.29  
4.25  
3.91  
3.89

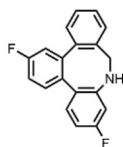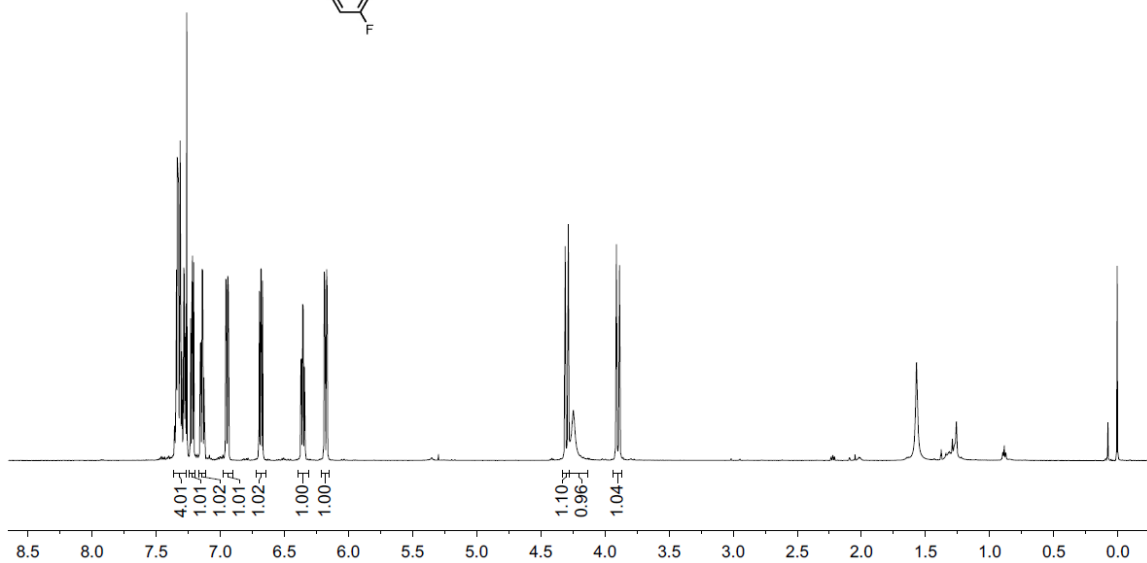

<sup>1</sup>H NMR (600 MHz, CDCl<sub>3</sub>)

163.51  
163.04  
161.89  
161.41  
147.21  
147.14  
143.32  
143.27  
142.29  
137.71  
137.69  
136.23  
136.39  
135.32  
133.05  
132.99  
128.74  
128.37  
128.14  
127.56  
123.50  
116.04  
115.90  
114.99  
114.85  
105.76  
105.62  
104.31  
104.15

-48.77

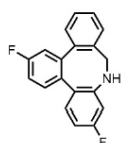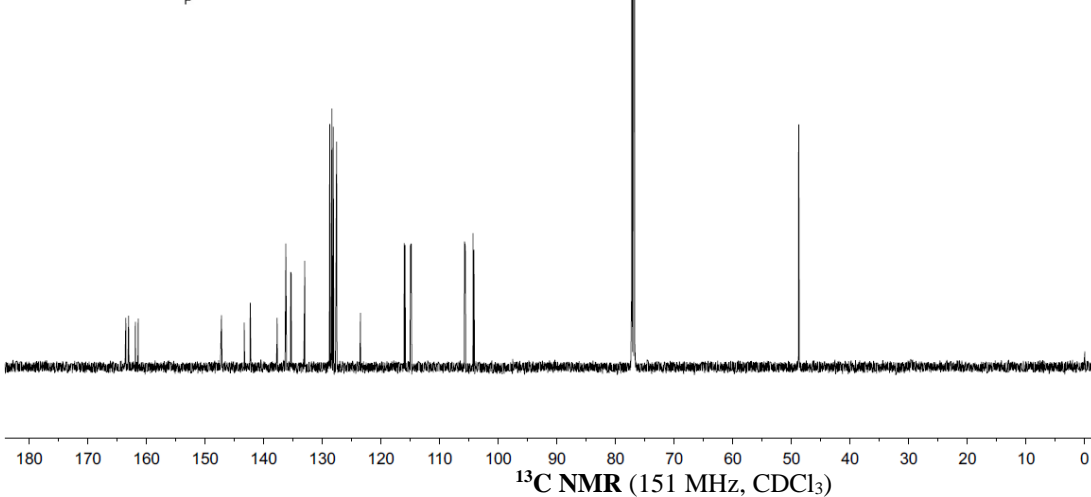

<sup>13</sup>C NMR (151 MHz, CDCl<sub>3</sub>)

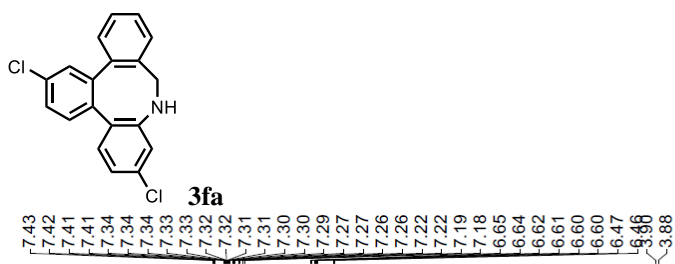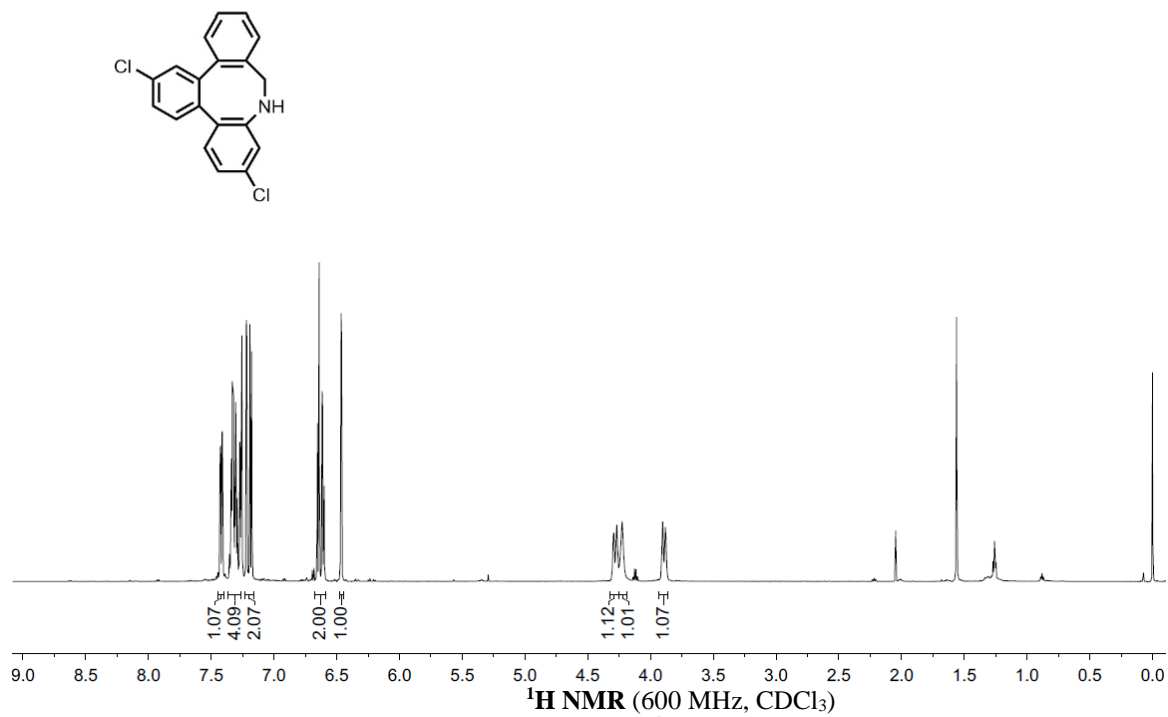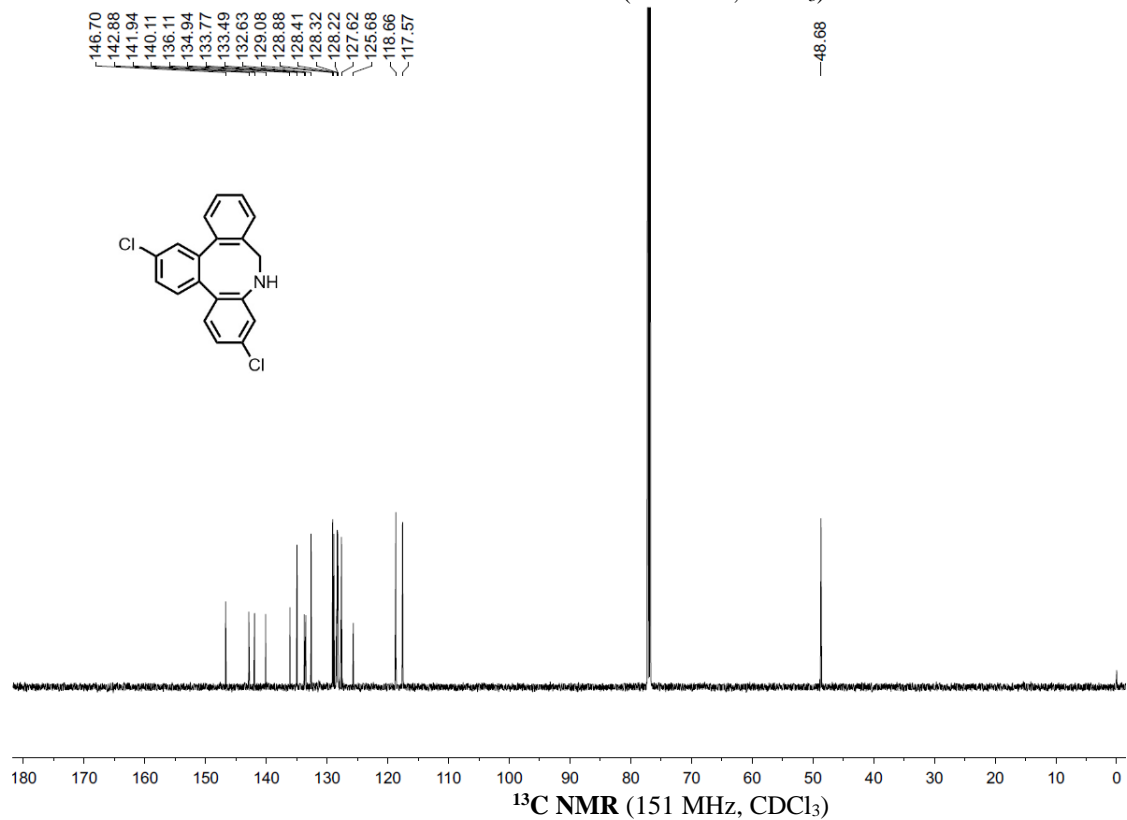

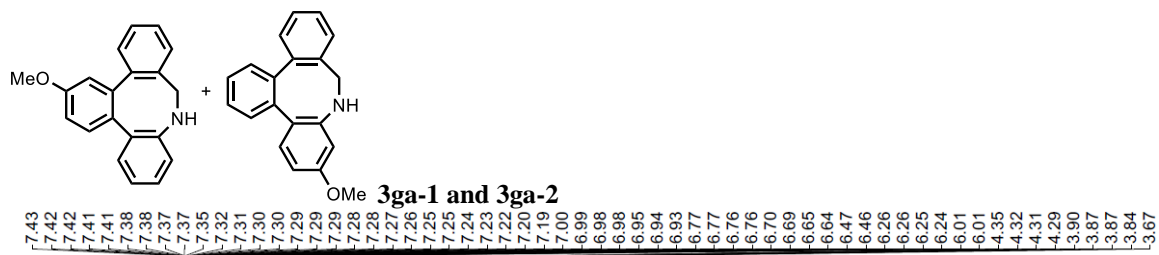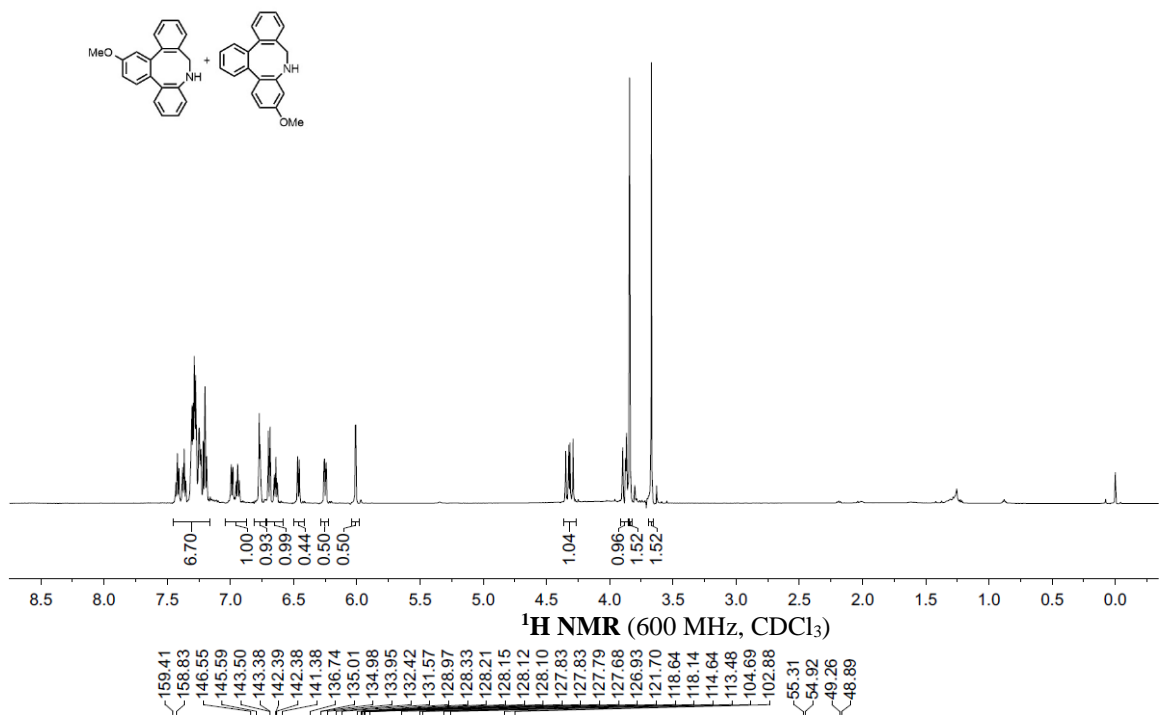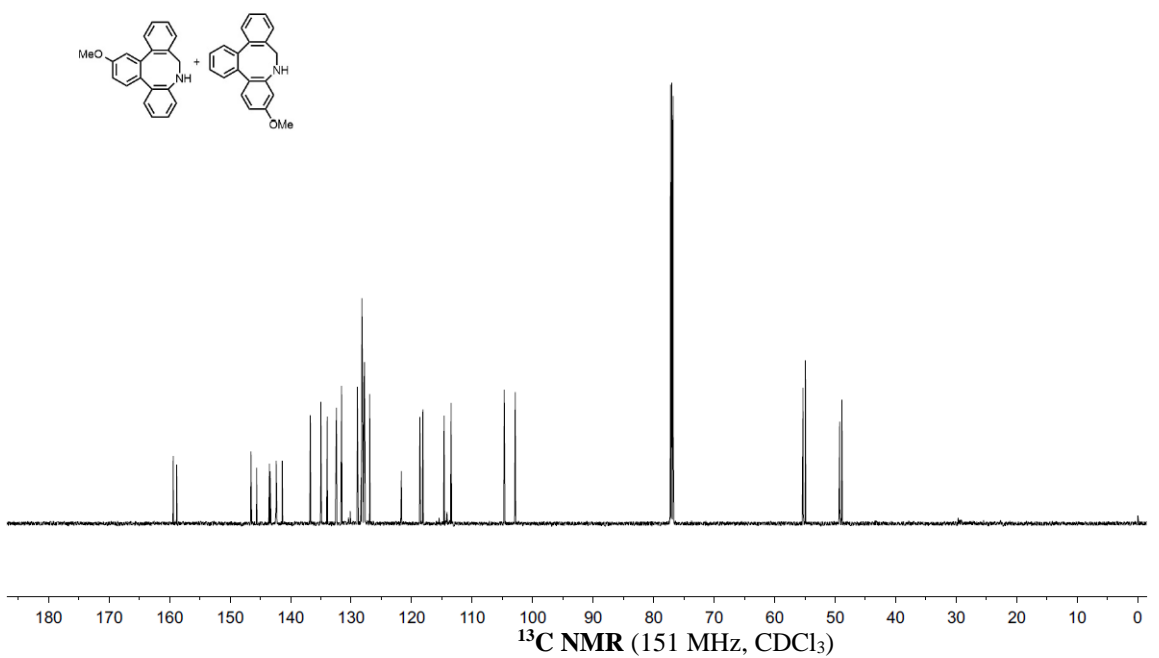

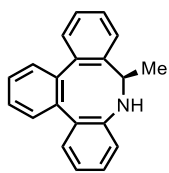

7.46  
7.46  
7.45  
7.45  
7.44  
7.43  
7.41  
7.40  
7.40  
7.39  
7.39  
7.35  
7.33  
7.32  
7.32  
7.31  
7.30  
7.29  
7.29  
7.28  
7.27  
7.26  
7.26  
7.25  
7.25  
7.24  
7.23  
7.23  
7.23  
7.22  
7.21  
6.95  
6.95  
6.94  
6.92  
6.92  
6.77  
6.77  
6.76  
6.76  
6.65  
6.65  
6.64  
6.63  
6.62  
6.62  
6.42  
6.42  
6.41  
6.41  
4.71  
4.70  
4.69  
4.68  
3.58  
1.49  
1.48

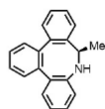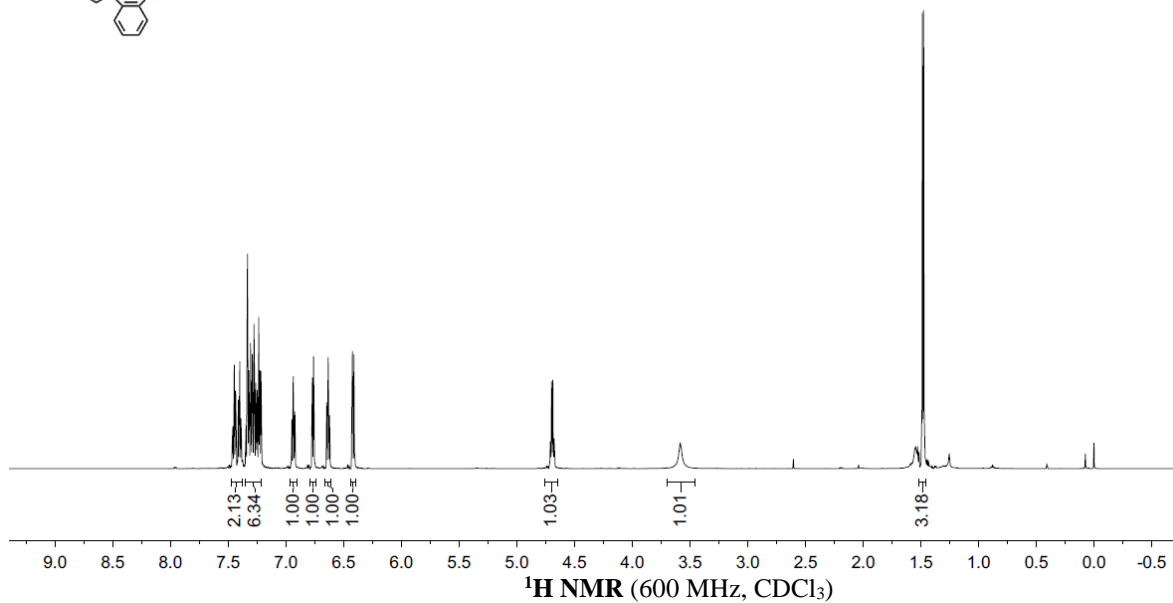

146.02  
143.14  
143.09  
141.31  
140.28  
133.82  
131.11  
128.90  
128.37  
128.20  
128.16  
127.97  
127.75  
127.29  
127.21  
123.13  
118.47  
117.95

-50.46

-20.28

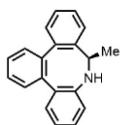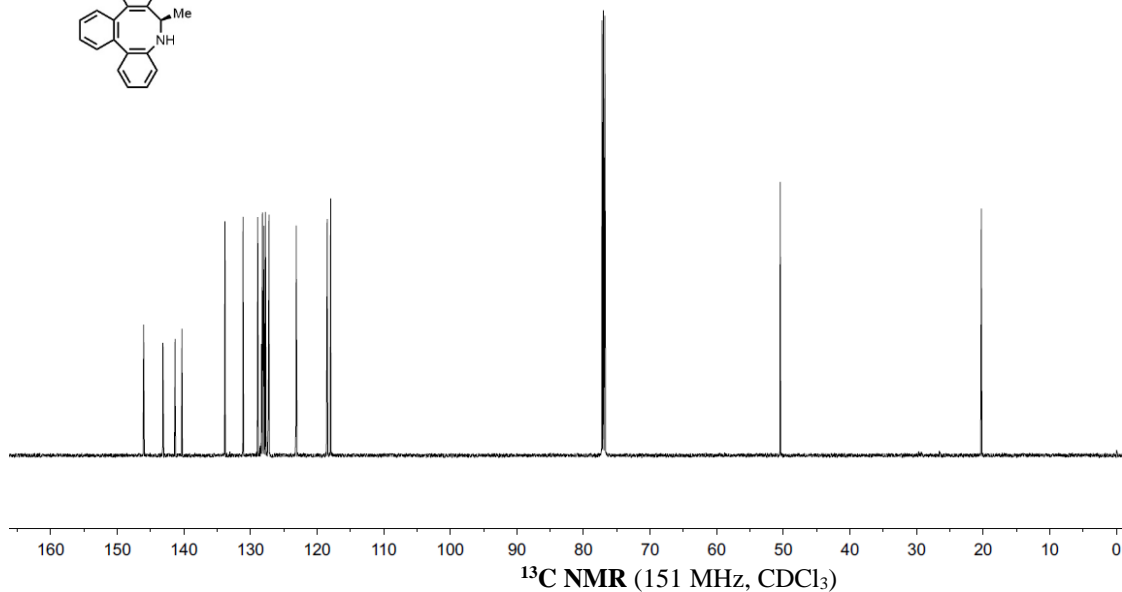

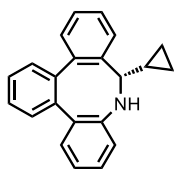

**5ab**

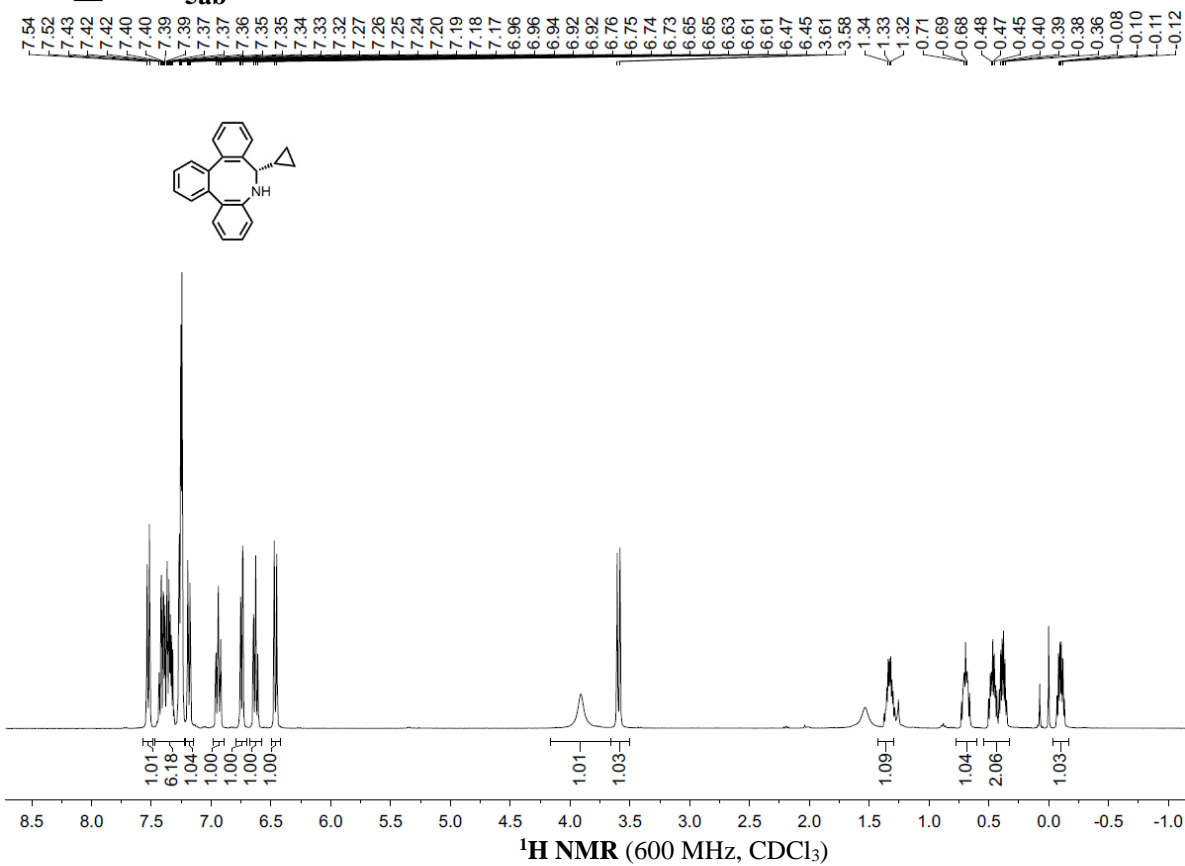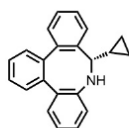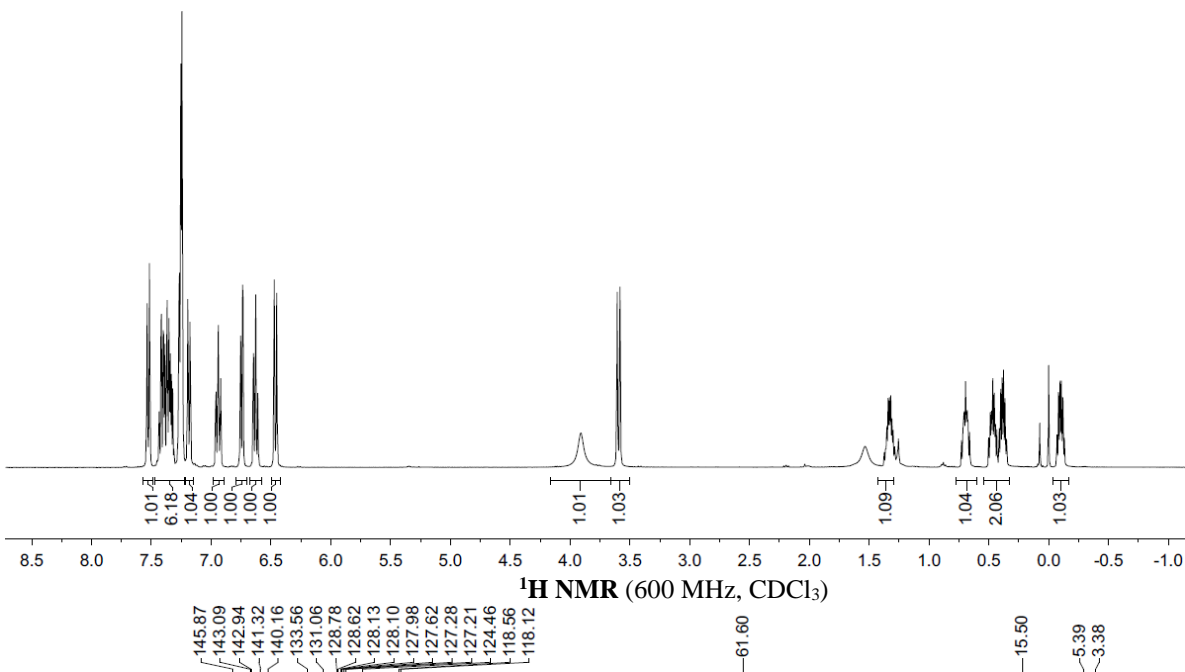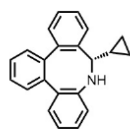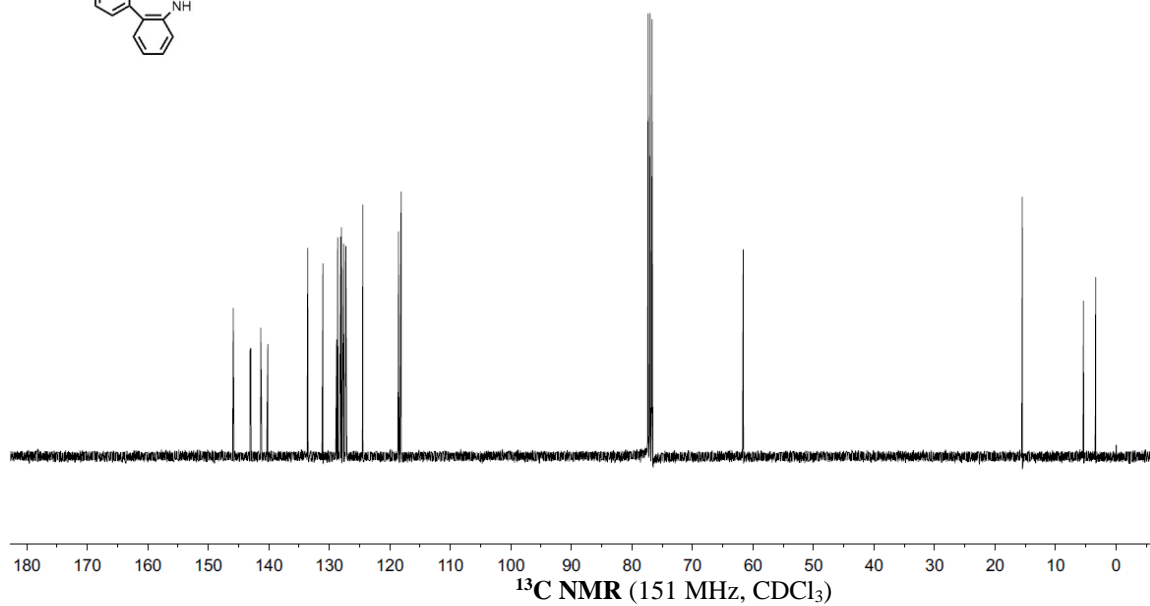



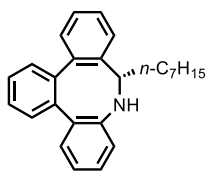

7.45  
7.44  
7.44  
7.43  
7.43  
7.41  
7.40  
7.39  
7.39  
7.38  
7.38  
7.32  
7.30  
7.30  
7.30  
7.29  
7.29  
7.28  
7.27  
7.27  
7.25  
7.25  
7.24  
7.24  
7.22  
7.22  
7.21  
7.21  
6.94  
6.94  
6.93  
6.92  
6.91  
6.77  
6.77  
6.76  
6.75  
6.75  
6.63  
6.63  
6.62  
6.61  
6.61  
6.41  
6.40  
6.40  
4.52  
4.50  
4.49  
4.49  
1.85  
1.85  
1.23  
1.22  
1.21  
1.20  
1.18  
1.16  
0.84  
0.83  
0.82

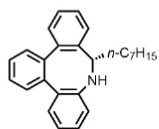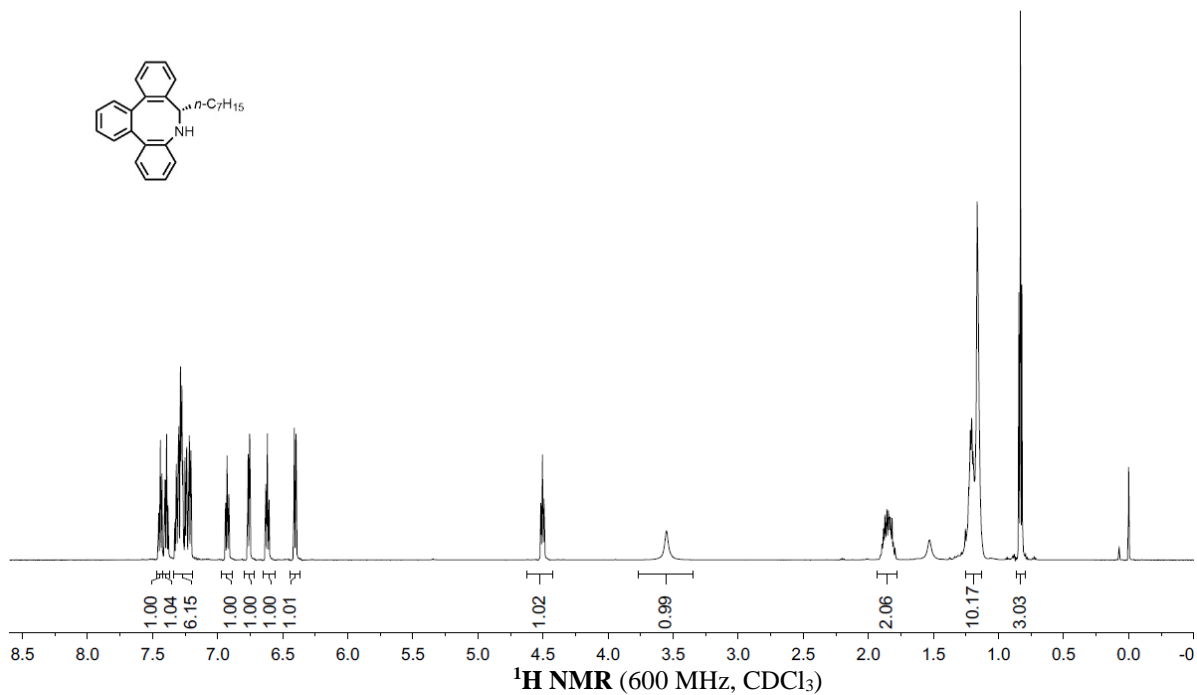

146.12  
143.63  
143.25  
141.32  
139.47  
133.91  
131.13  
128.70  
128.19  
128.17  
128.11  
127.95  
127.74  
127.21  
127.12  
123.44  
118.31  
117.86

55.19

34.25

31.70

29.28

28.96

26.57

22.53

14.05

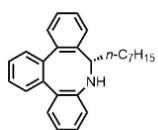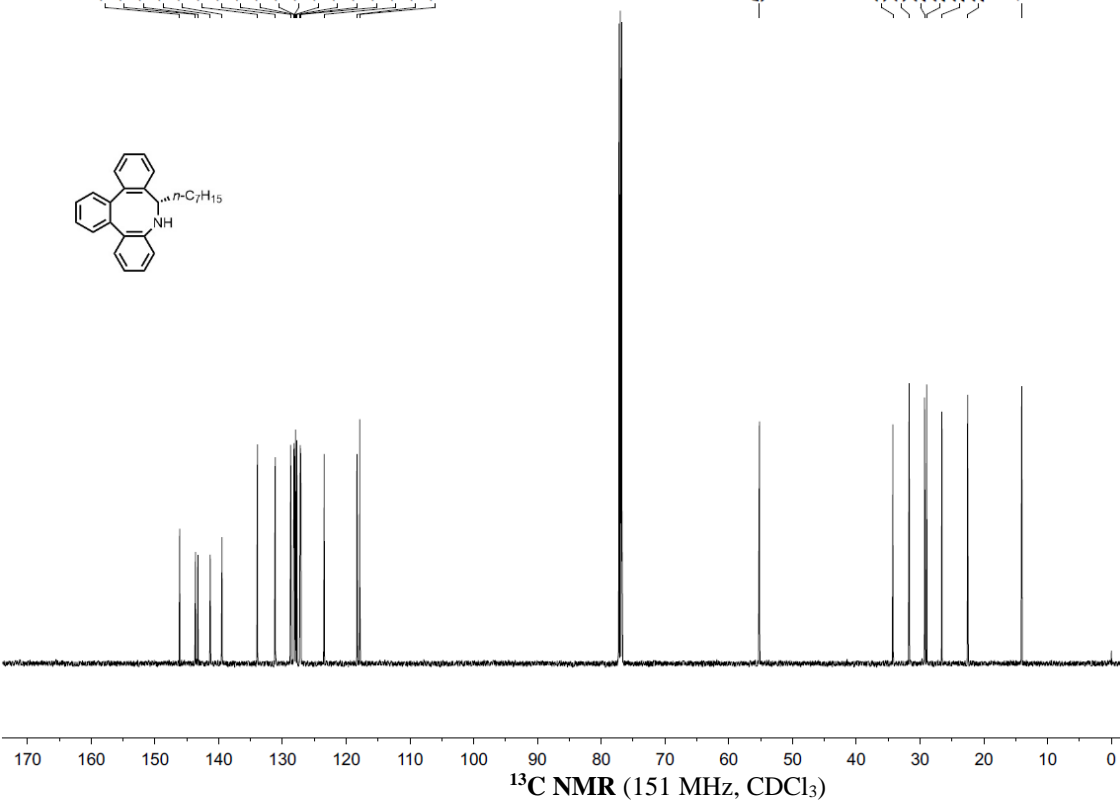

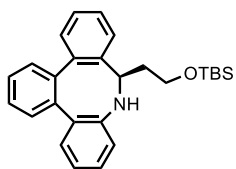

**5ad**

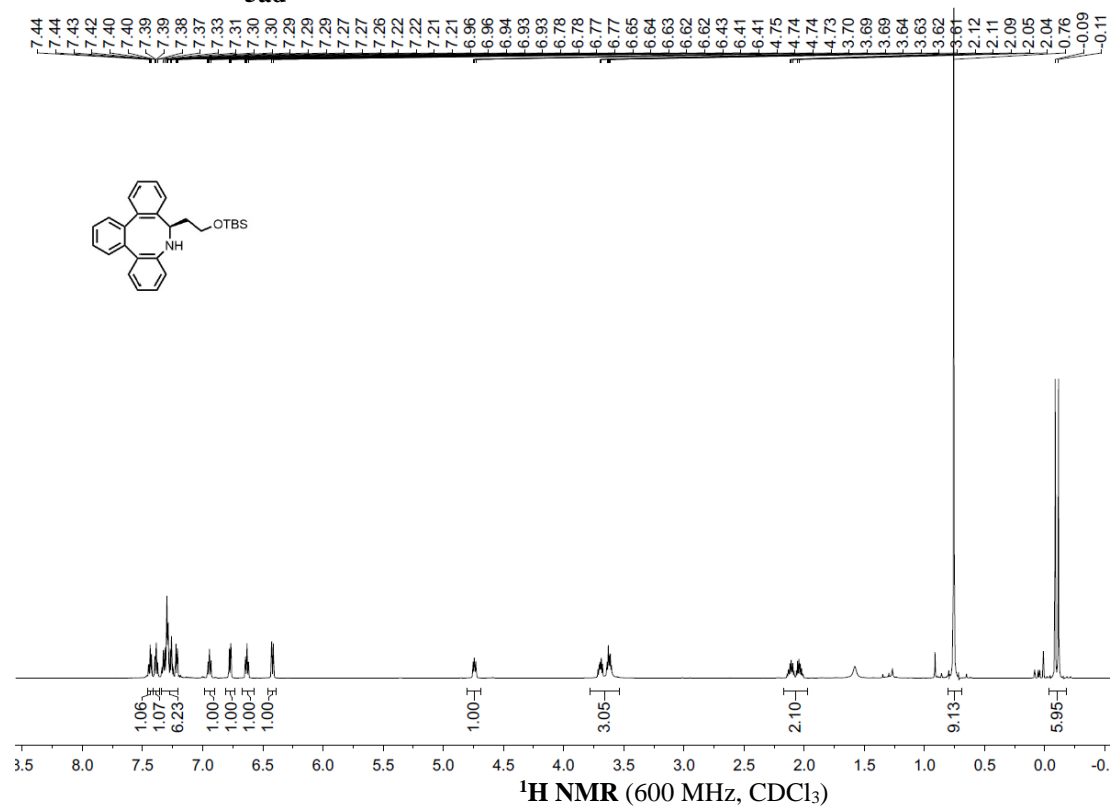

$^1\text{H NMR}$  (600 MHz,  $\text{CDCl}_3$ )

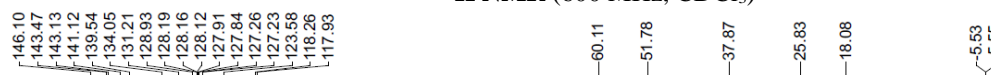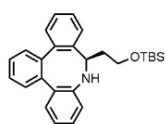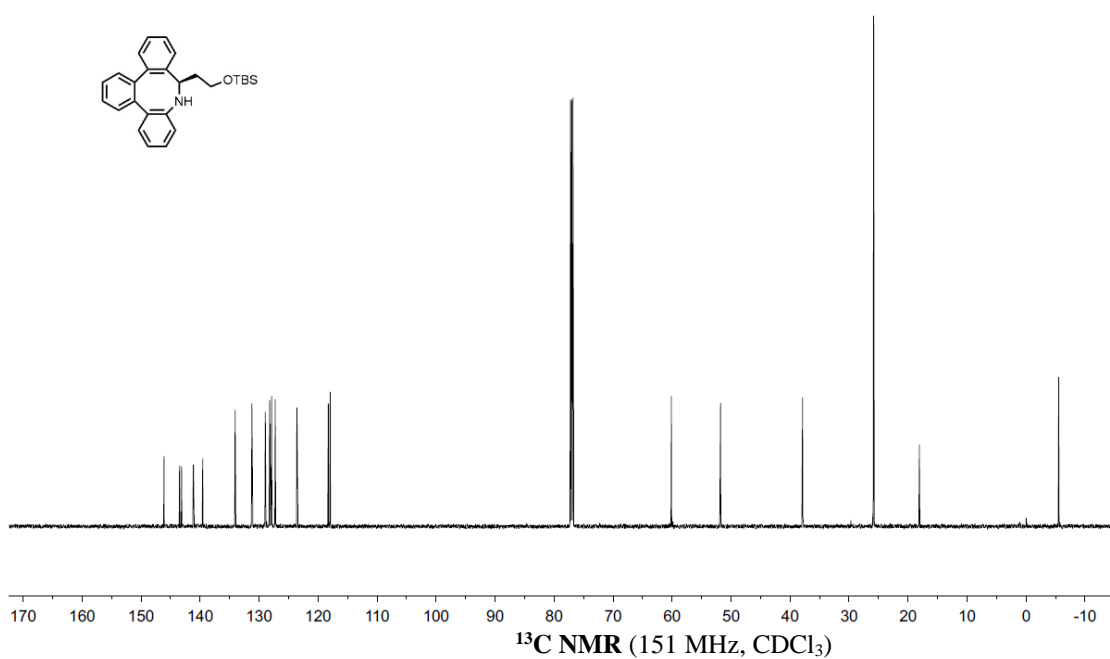

$^{13}\text{C NMR}$  (151 MHz,  $\text{CDCl}_3$ )

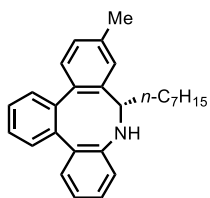

**5ae**

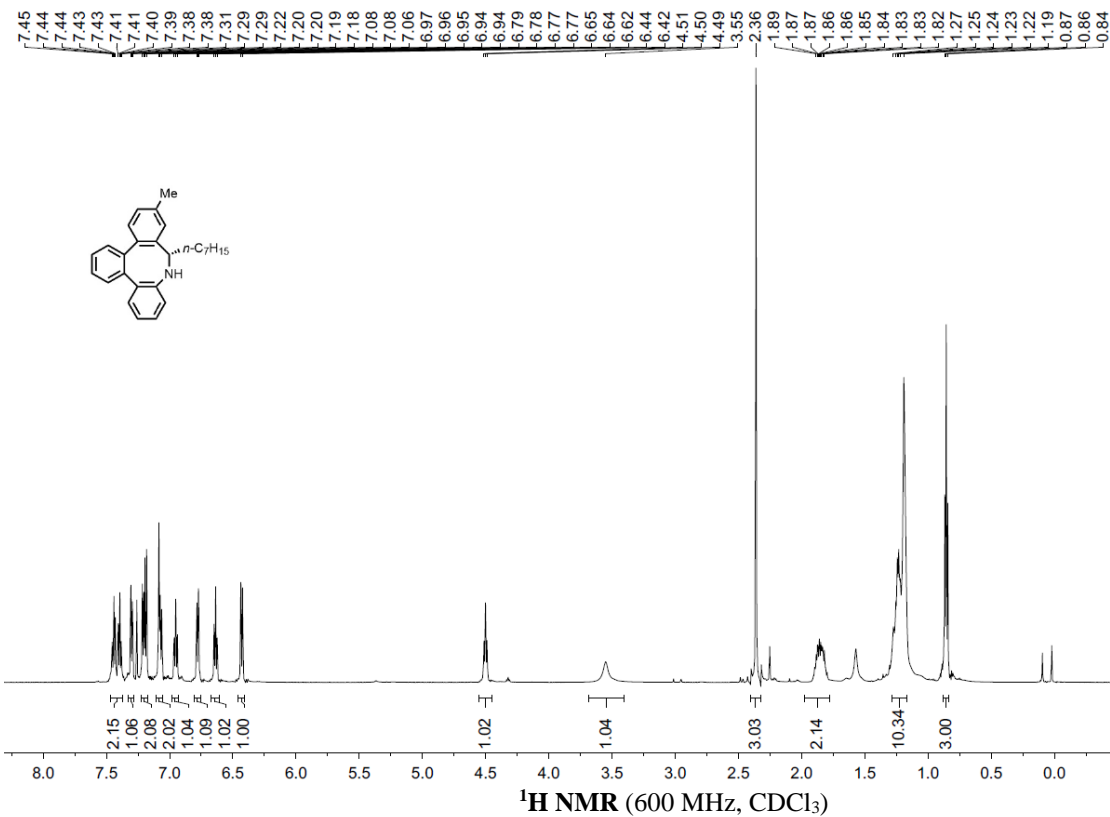

<sup>1</sup>H NMR (600 MHz, CDCl<sub>3</sub>)

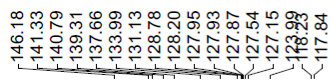

<sup>13</sup>C NMR (151 MHz, CDCl<sub>3</sub>)

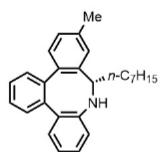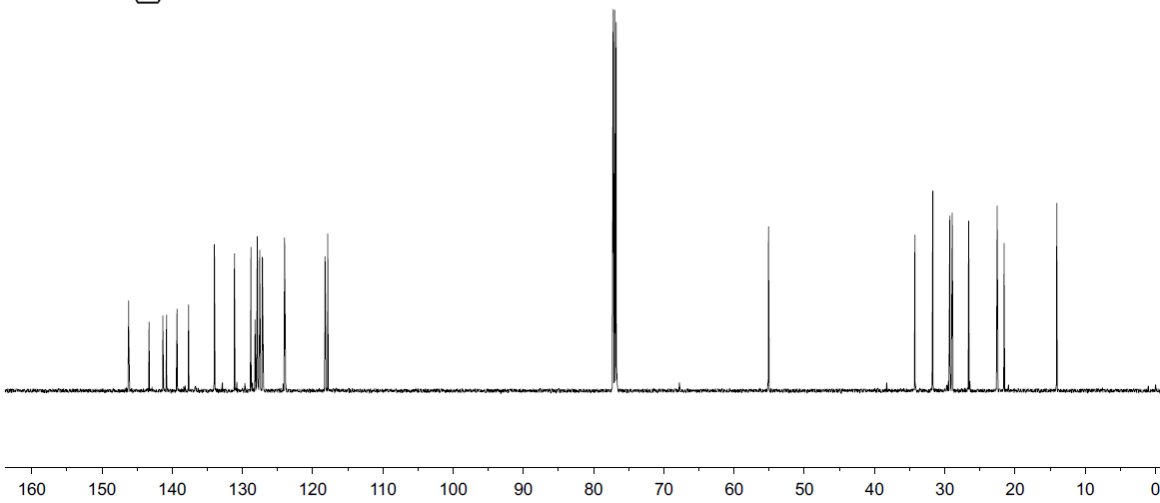

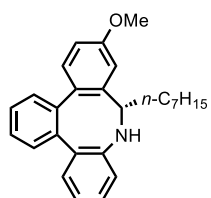

**5af**

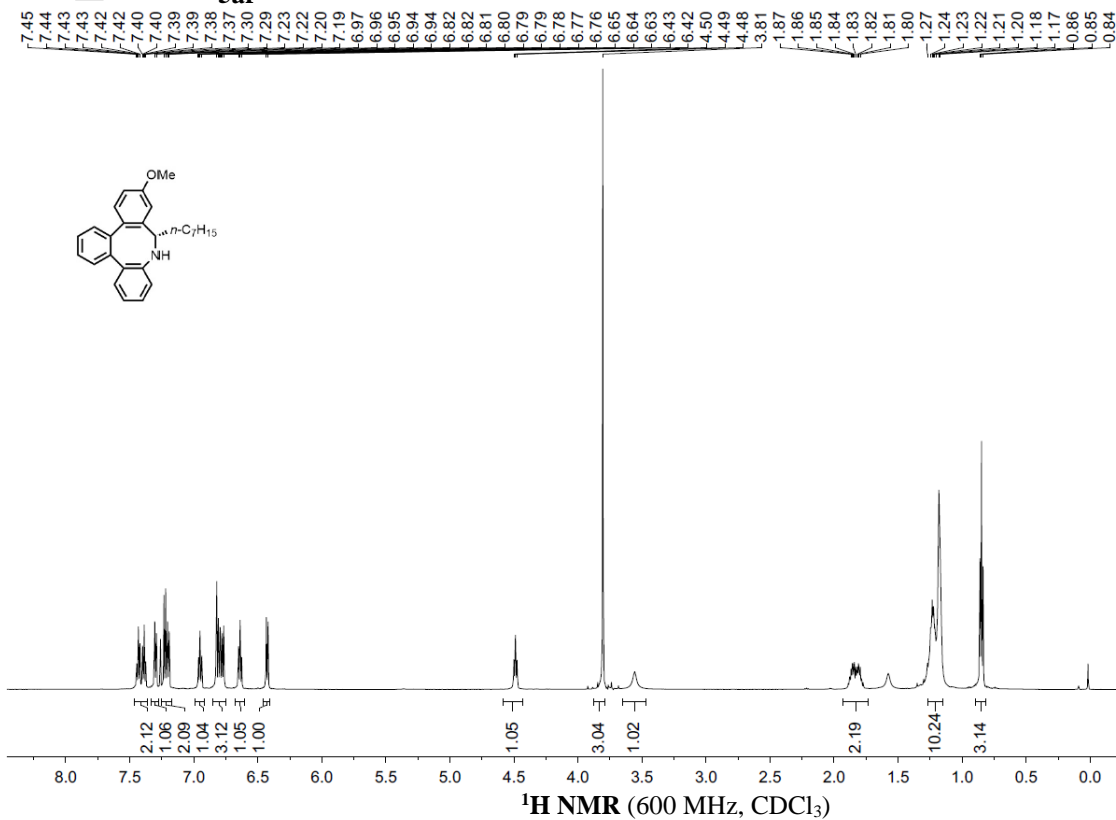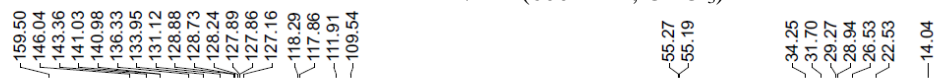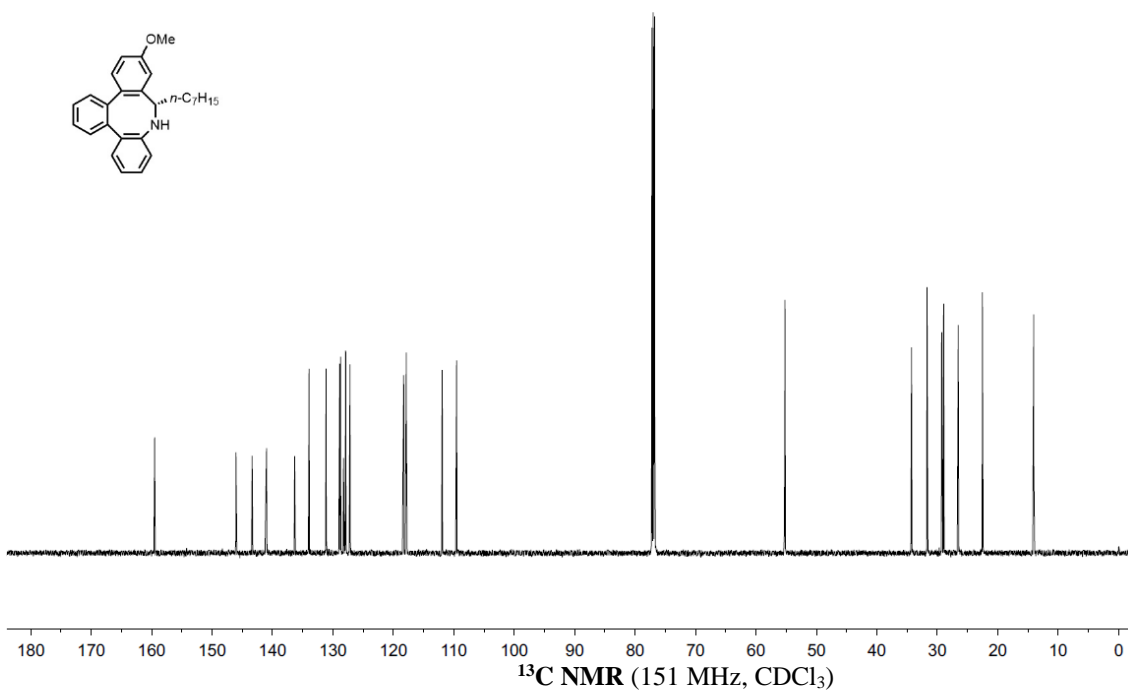

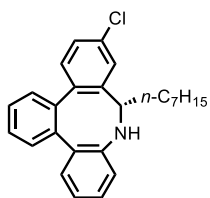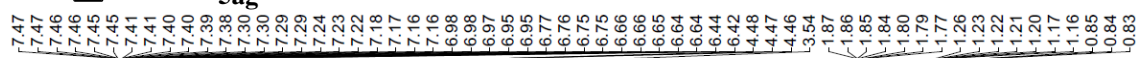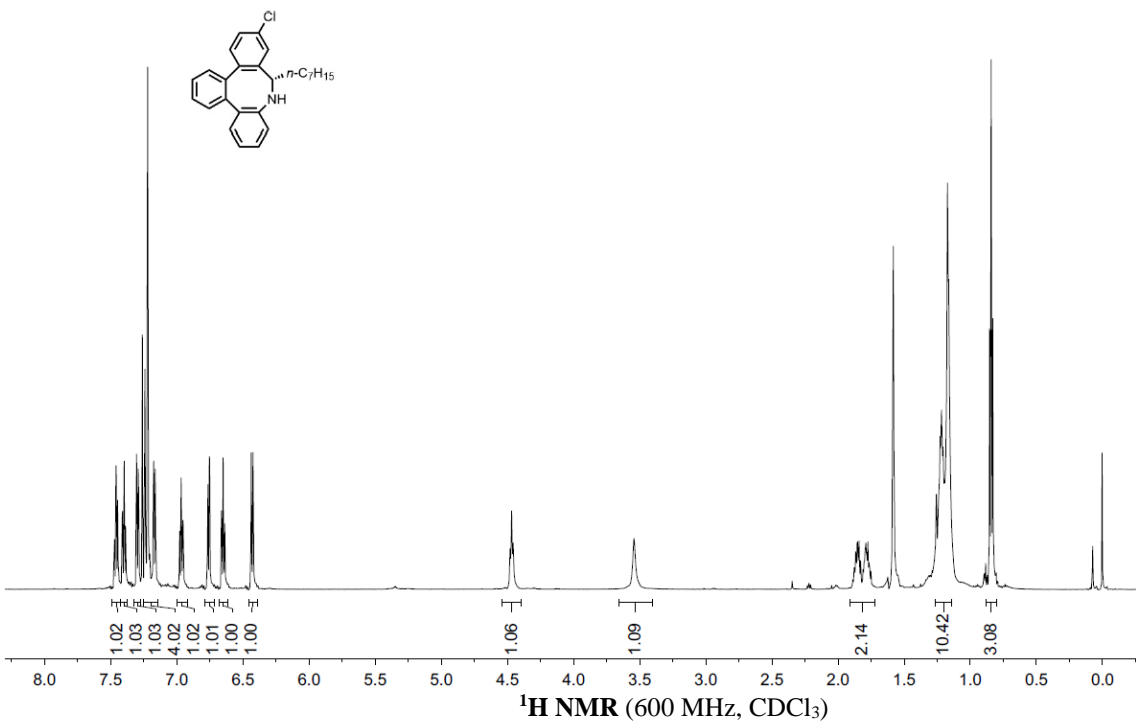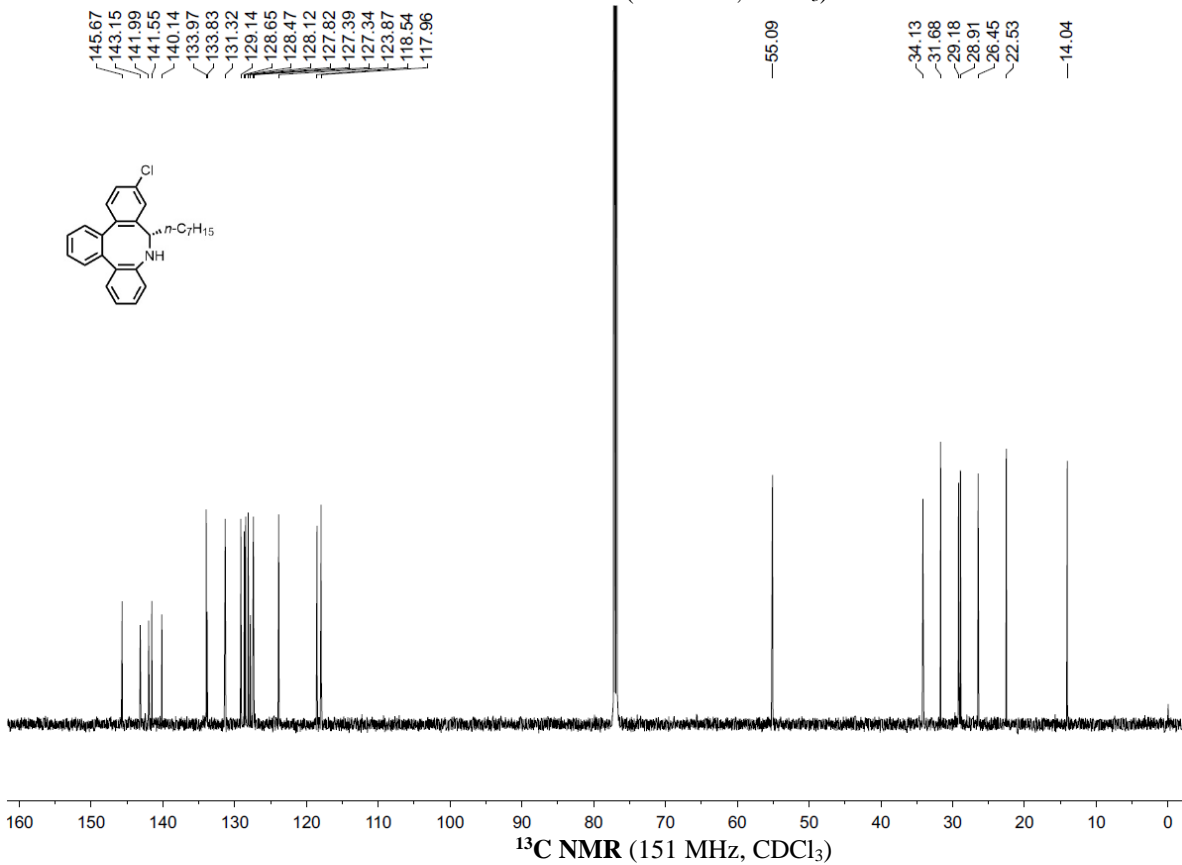

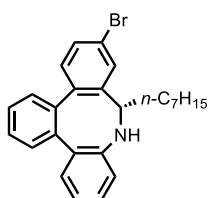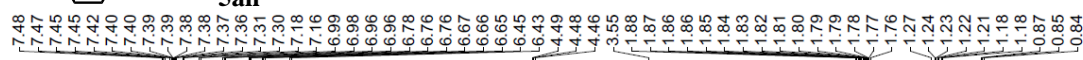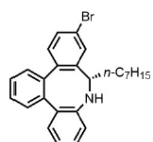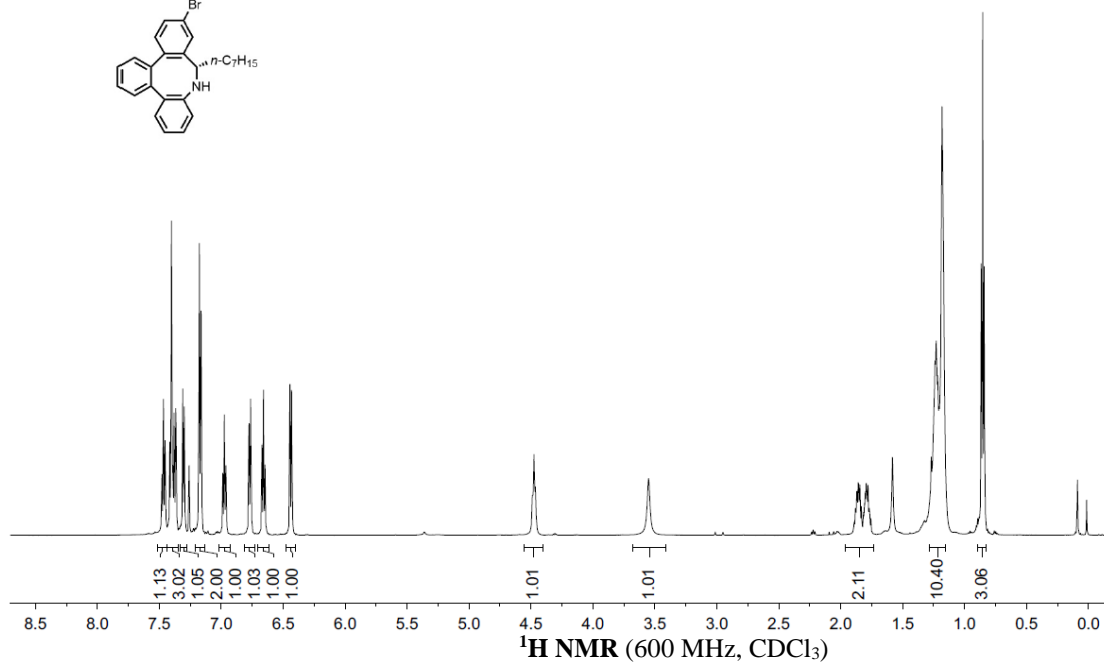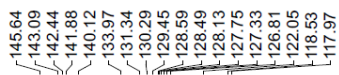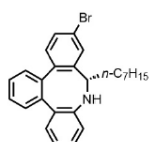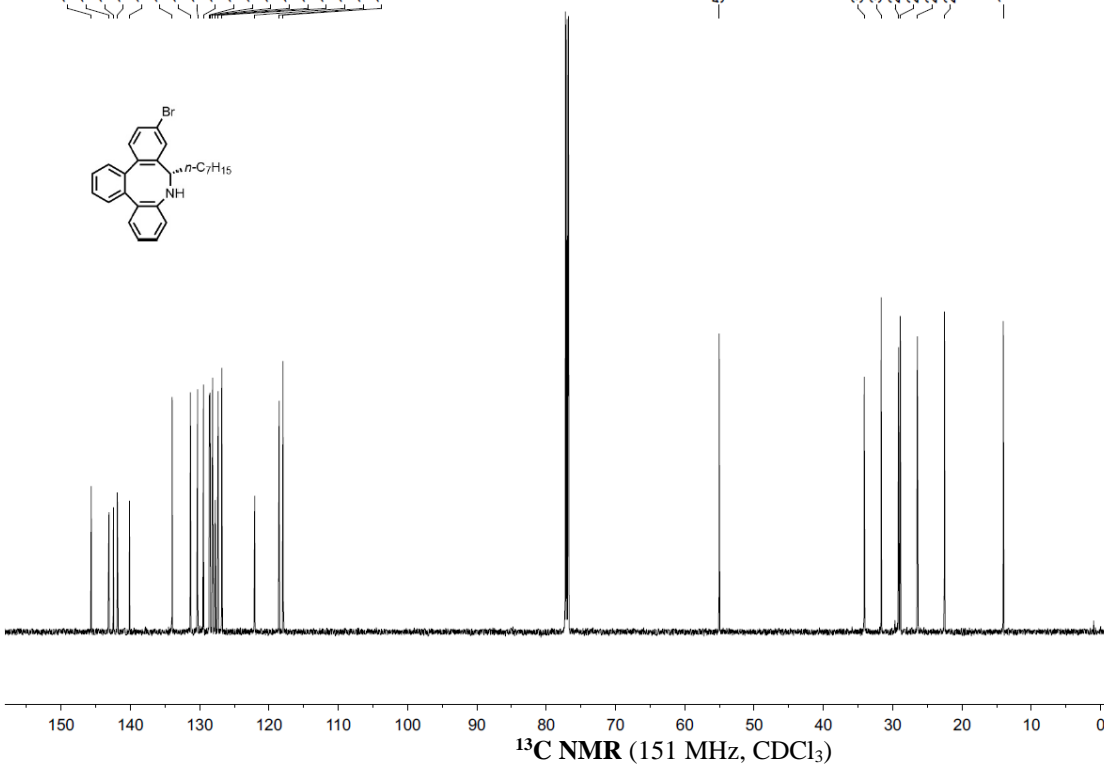

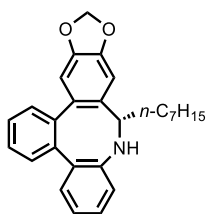

7.44  
7.44  
7.43  
7.43  
7.42  
7.42  
7.39  
7.38  
7.38  
7.37  
7.37  
7.28  
7.28  
7.27  
7.27  
7.19  
7.19  
7.18  
7.18  
6.99  
6.99  
6.97  
6.96  
6.96  
6.78  
6.78  
6.77  
6.77  
6.75  
6.74  
6.67  
6.65  
6.64  
6.44  
6.42  
6.42  
5.95  
5.88  
5.88  
4.44  
4.43  
4.42  
1.83  
1.82  
1.81  
1.80  
1.74  
1.74  
1.24  
1.23  
1.22  
1.21  
1.20  
1.20  
1.19  
1.17  
1.16  
0.86  
0.85  
0.83

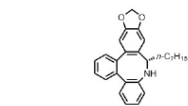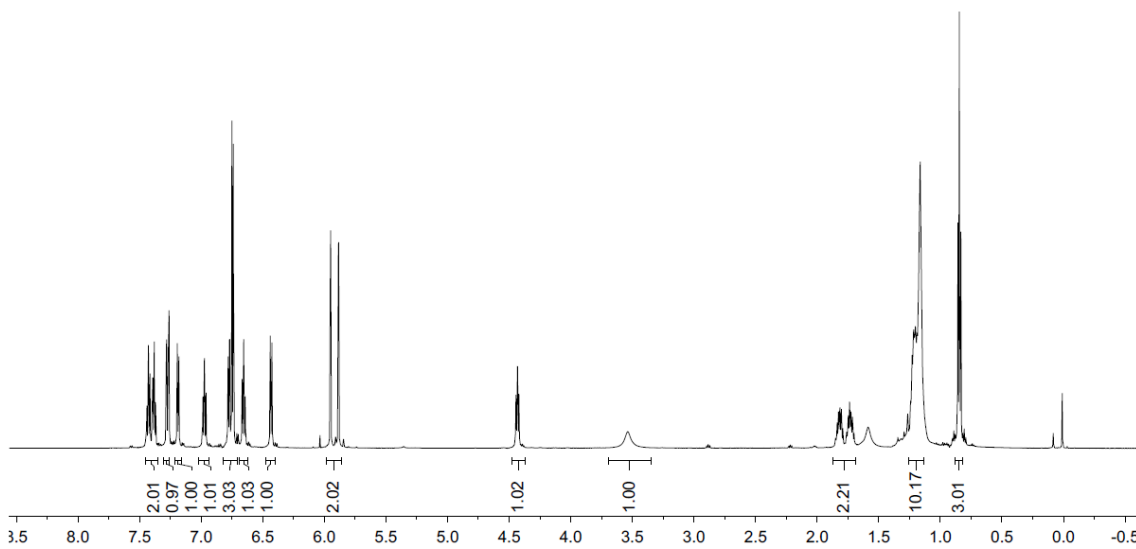

<sup>1</sup>H NMR (600 MHz, CDCl<sub>3</sub>)

147.59  
146.25  
146.12  
143.33  
141.21  
137.17  
133.83  
133.14  
131.16  
128.67  
128.30  
128.04  
127.96  
127.21  
118.27  
117.79  
107.98  
103.67  
100.94  
-55.14  
34.44  
31.70  
29.22  
28.96  
28.49  
22.53  
-14.04

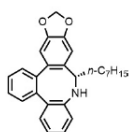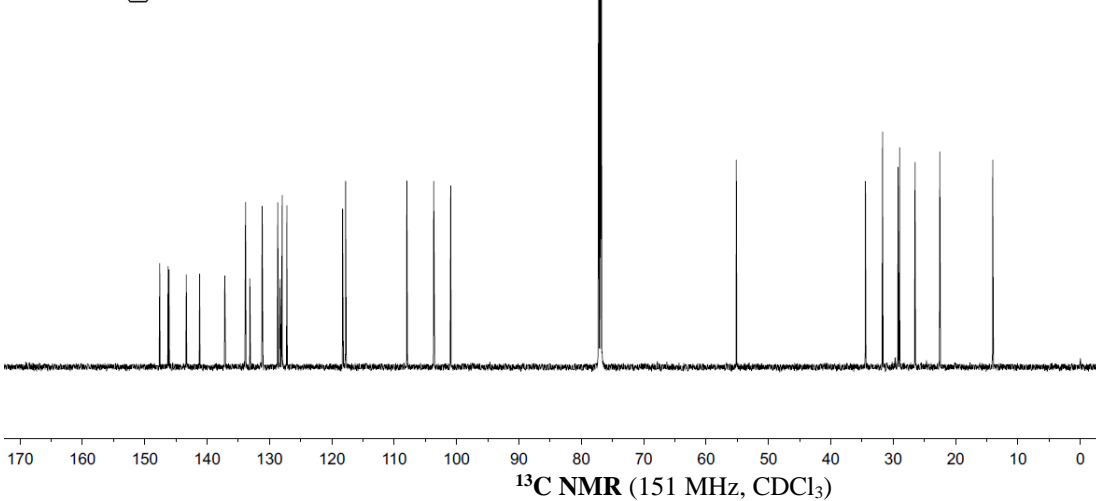

<sup>13</sup>C NMR (151 MHz, CDCl<sub>3</sub>)

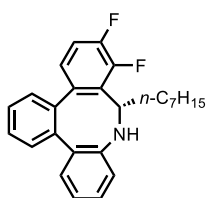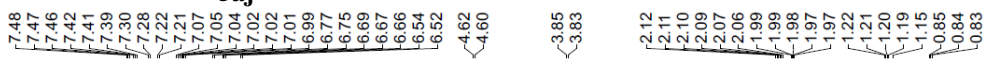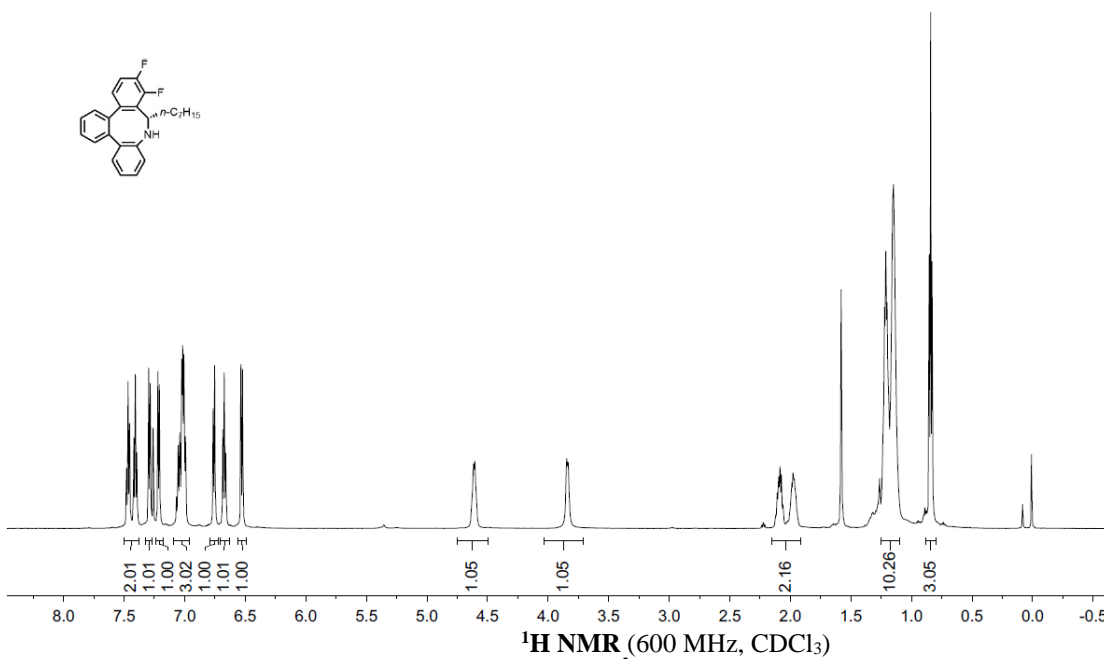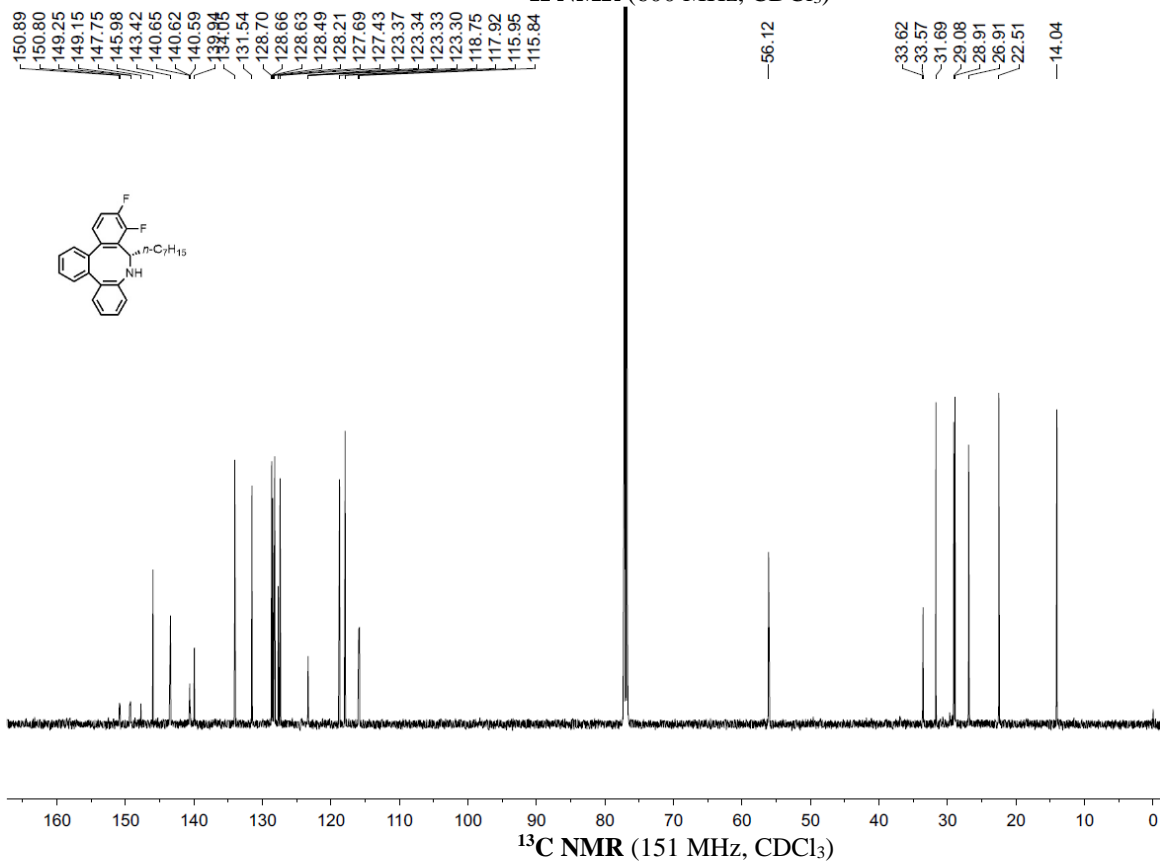



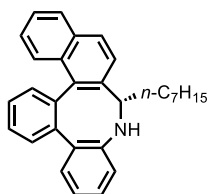

7.84  
7.82  
7.81  
7.79  
7.78  
7.52  
7.51  
7.48  
7.46  
7.45  
7.43  
7.42  
7.41  
7.41  
7.40  
7.39  
7.39  
7.39  
7.38  
7.37  
7.32  
7.30  
7.26  
6.89  
6.88  
6.87  
6.86  
6.86  
6.82  
6.82  
6.81  
6.56  
6.55  
6.54  
6.38  
6.37  
4.64  
4.63  
1.97  
1.96  
1.94  
1.93  
1.27  
1.23  
1.22  
1.20  
1.19  
0.85  
0.84  
0.83

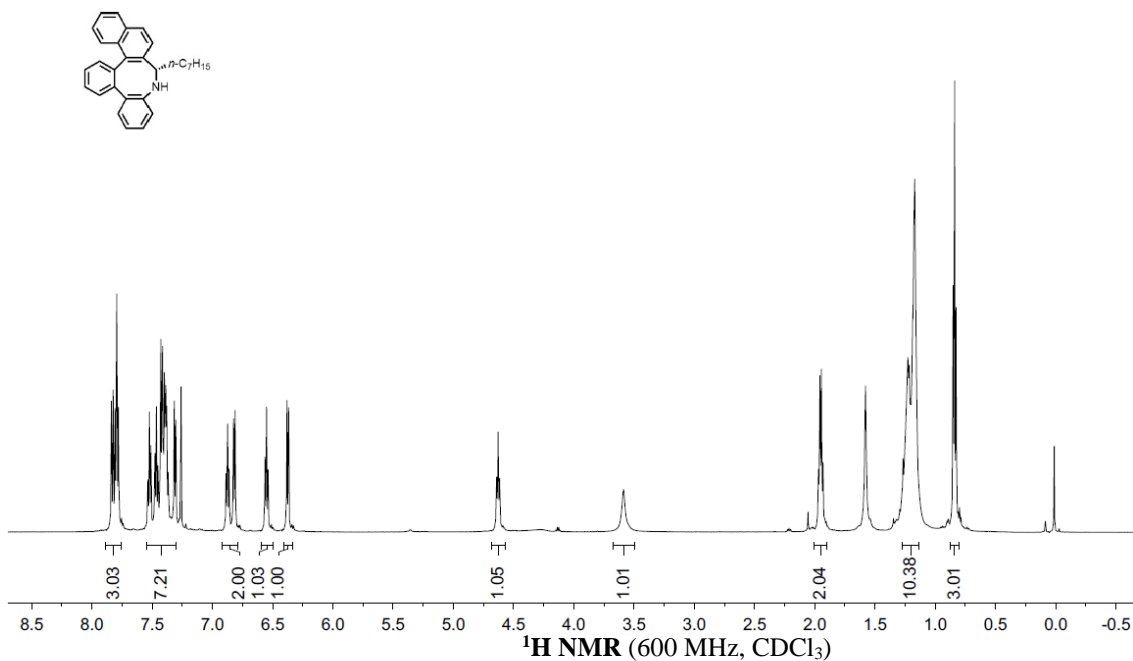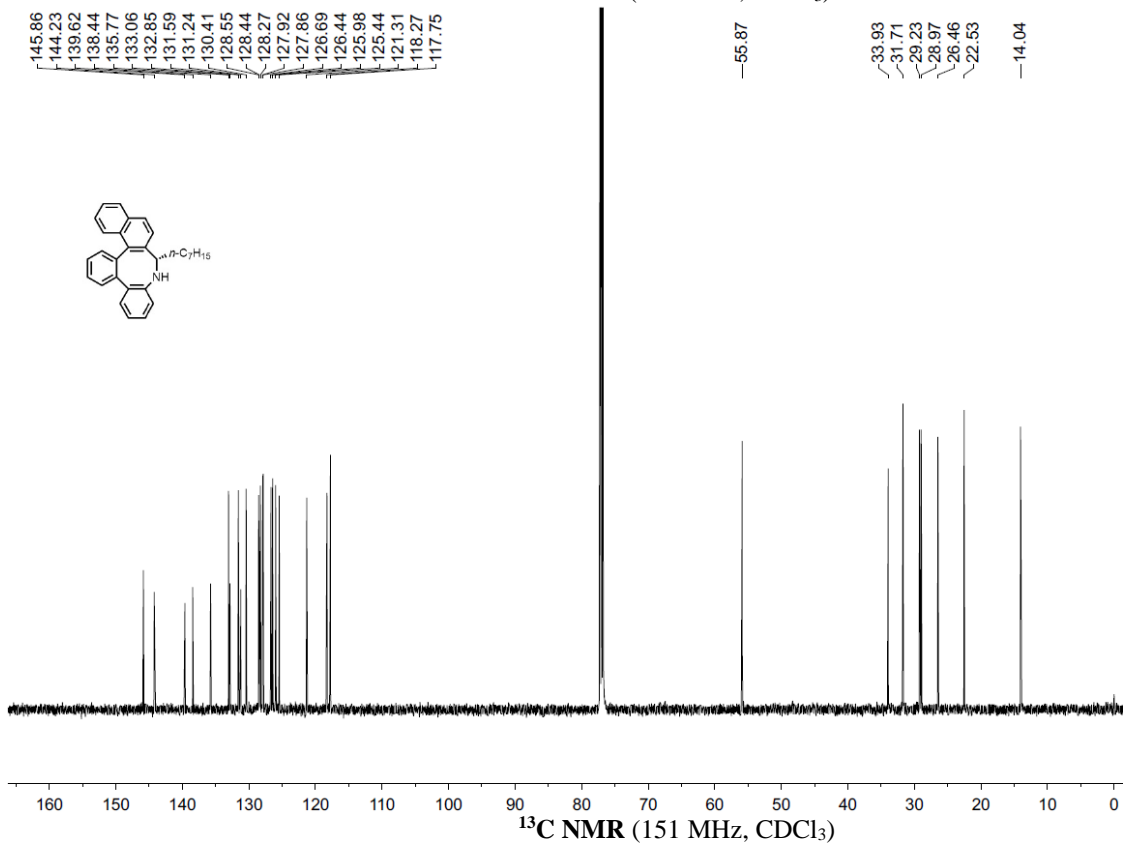

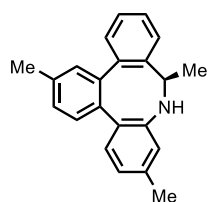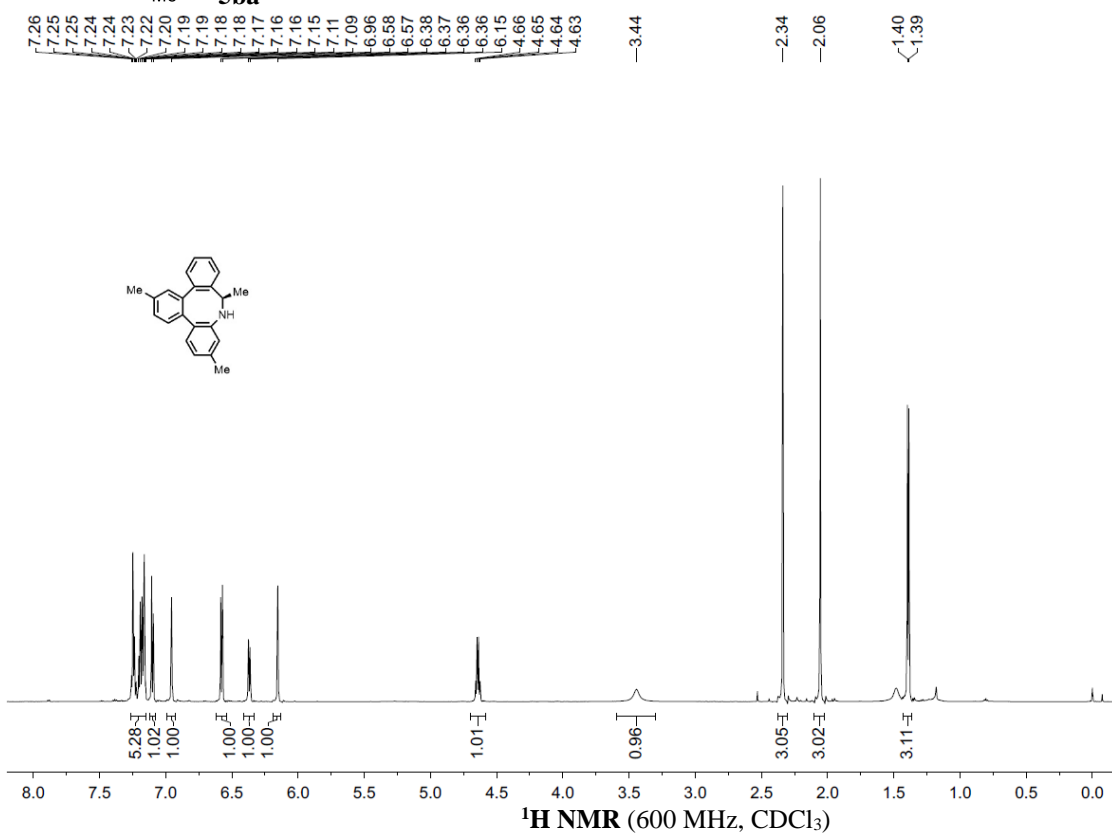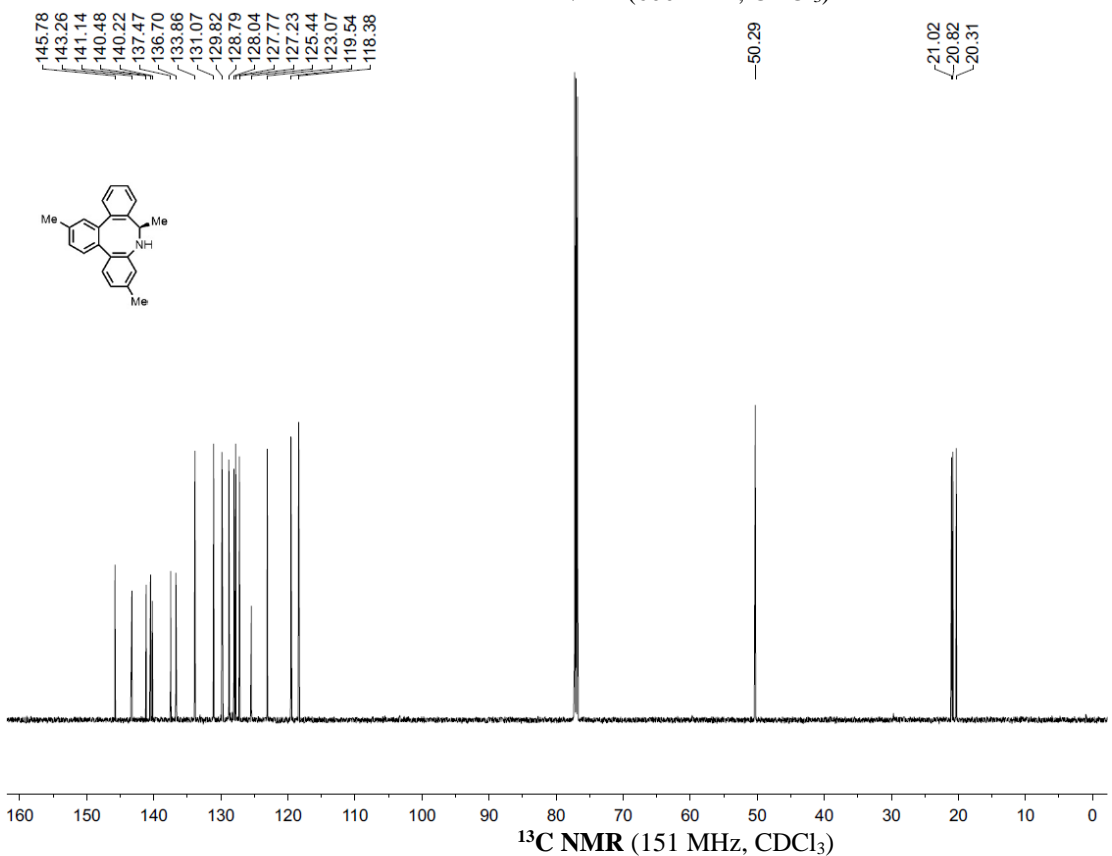

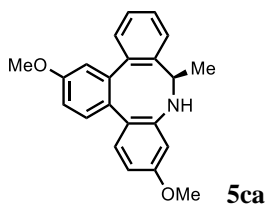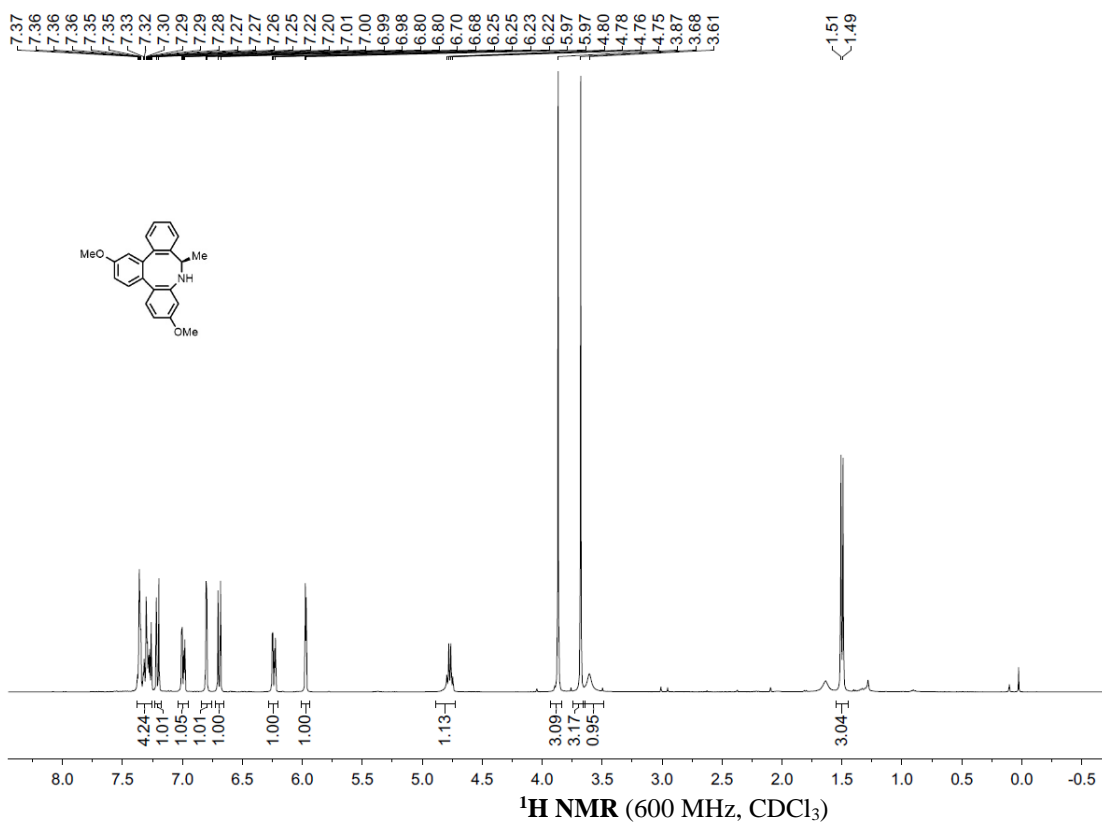

<sup>13</sup>C NMR (151 MHz, CDCl<sub>3</sub>)

| Chemical Shift (ppm) |
|----------------------|
| 159.17               |
| 158.71               |
| 147.13               |
| 143.03               |
| 142.54               |
| 140.38               |
| 135.29               |
| 134.96               |
| 132.20               |
| 128.20               |
| 127.59               |
| 127.28               |
| 123.16               |
| 120.99               |
| 114.60               |
| 113.25               |
| 104.50               |
| 102.62               |
| 55.29                |
| 54.87                |
| 50.20                |
| 20.26                |

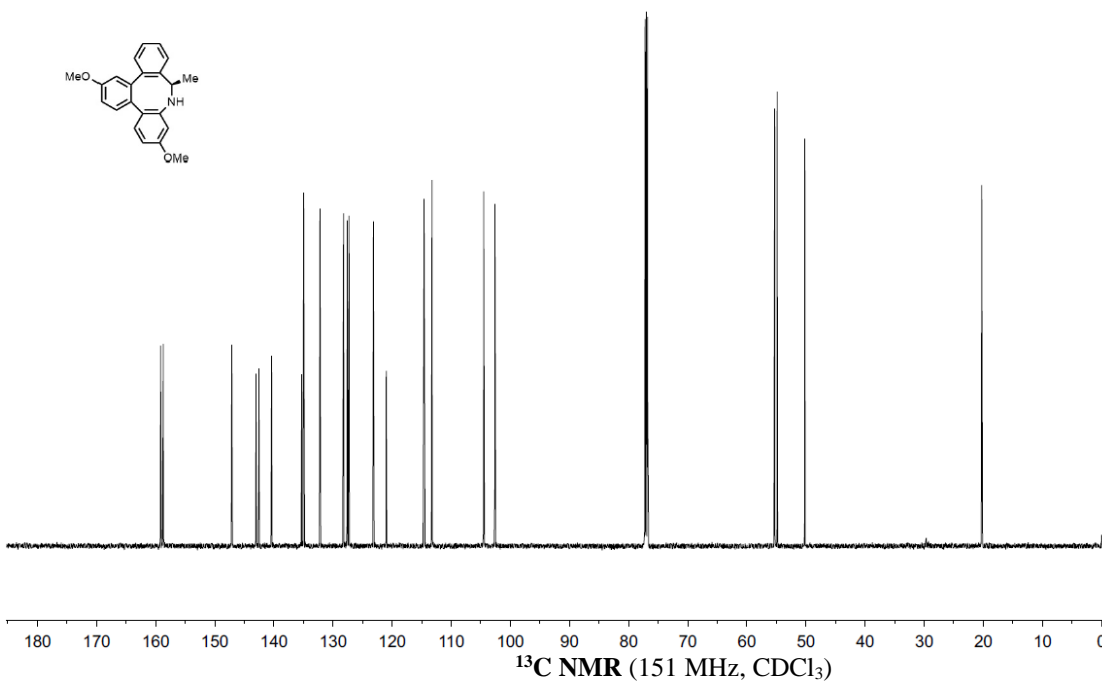

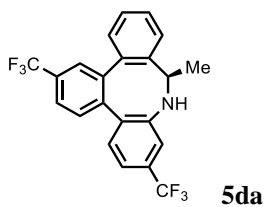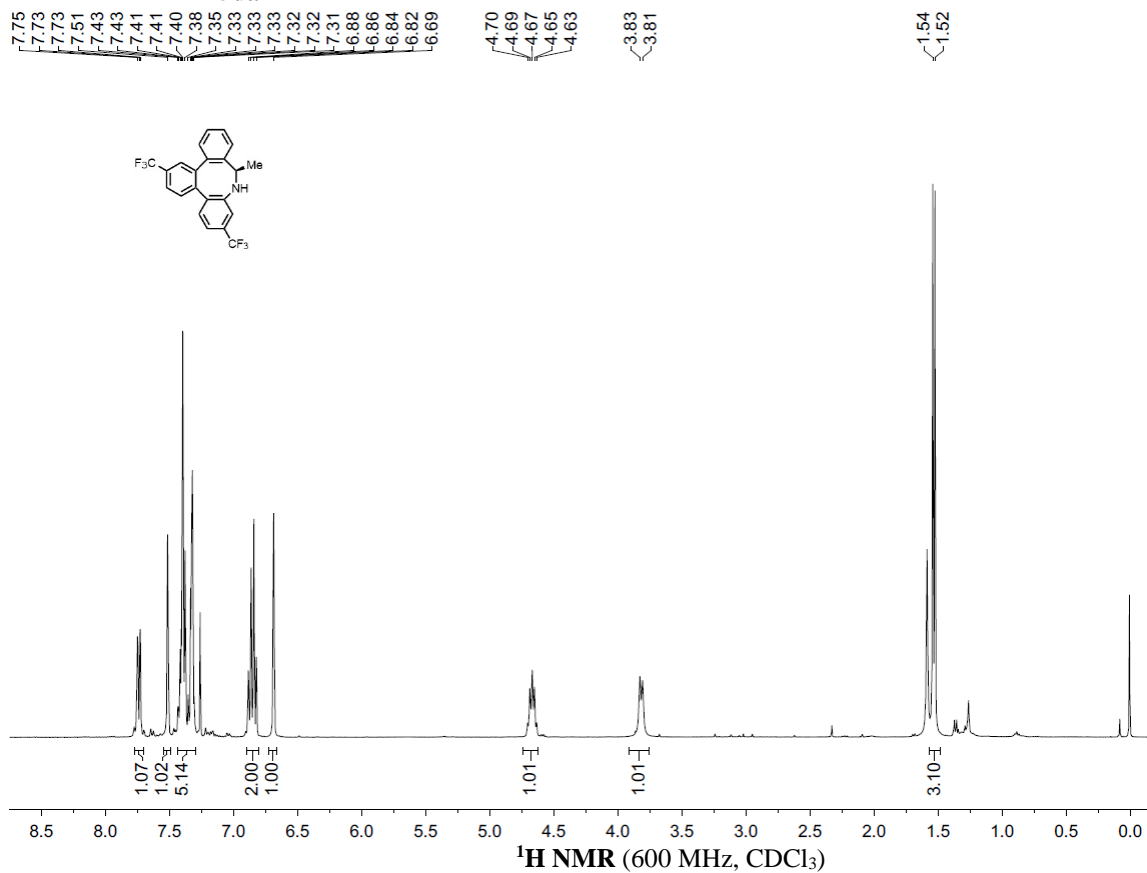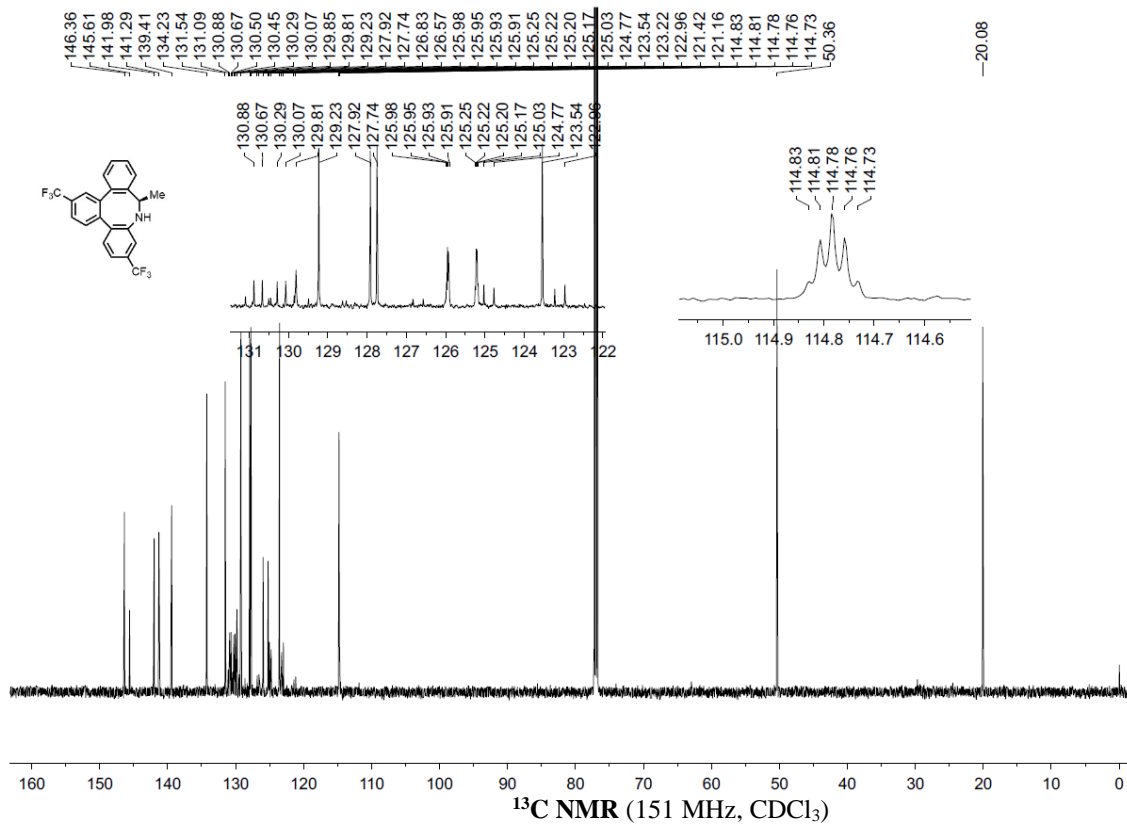

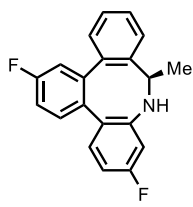

7.39  
7.39  
7.38  
7.38  
7.37  
7.36  
7.35  
7.34  
7.31  
7.31  
7.30  
7.29  
7.29  
7.28  
7.28  
7.27  
7.27  
7.26  
7.26  
7.23  
7.22  
7.21  
7.20  
7.16  
7.15  
7.14  
7.14  
7.13  
7.13  
6.97  
6.97  
6.96  
6.95  
6.69  
6.68  
6.68  
6.67  
6.36  
6.35  
6.35  
6.34  
6.34  
6.33  
6.32  
6.14  
6.14  
6.12  
6.12  
4.70  
3.65  
1.51  
1.50

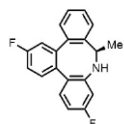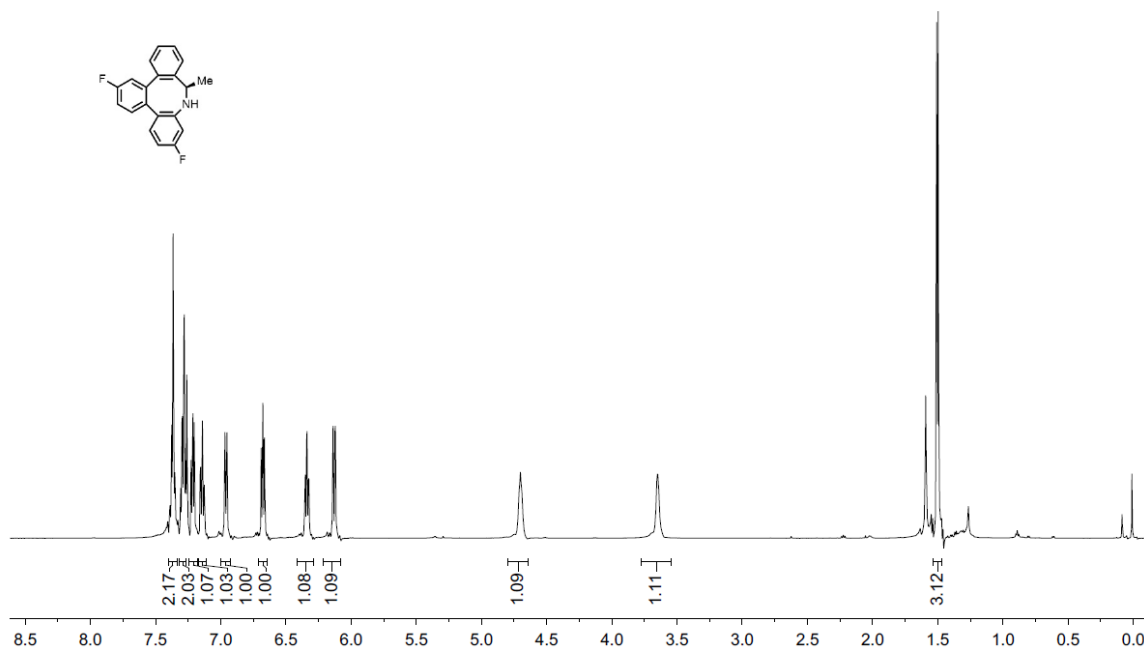

<sup>1</sup>H NMR (600 MHz, CDCl<sub>3</sub>)

163.44  
163.12  
161.82  
161.48  
147.69  
143.37  
143.31  
141.85  
139.83  
138.19  
138.17  
135.29  
135.23  
132.68  
132.63  
128.76  
127.60  
127.53  
123.33  
123.29  
116.01  
115.86  
114.92  
114.79  
105.64  
105.50  
104.13  
103.97

50.28  
20.11

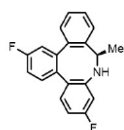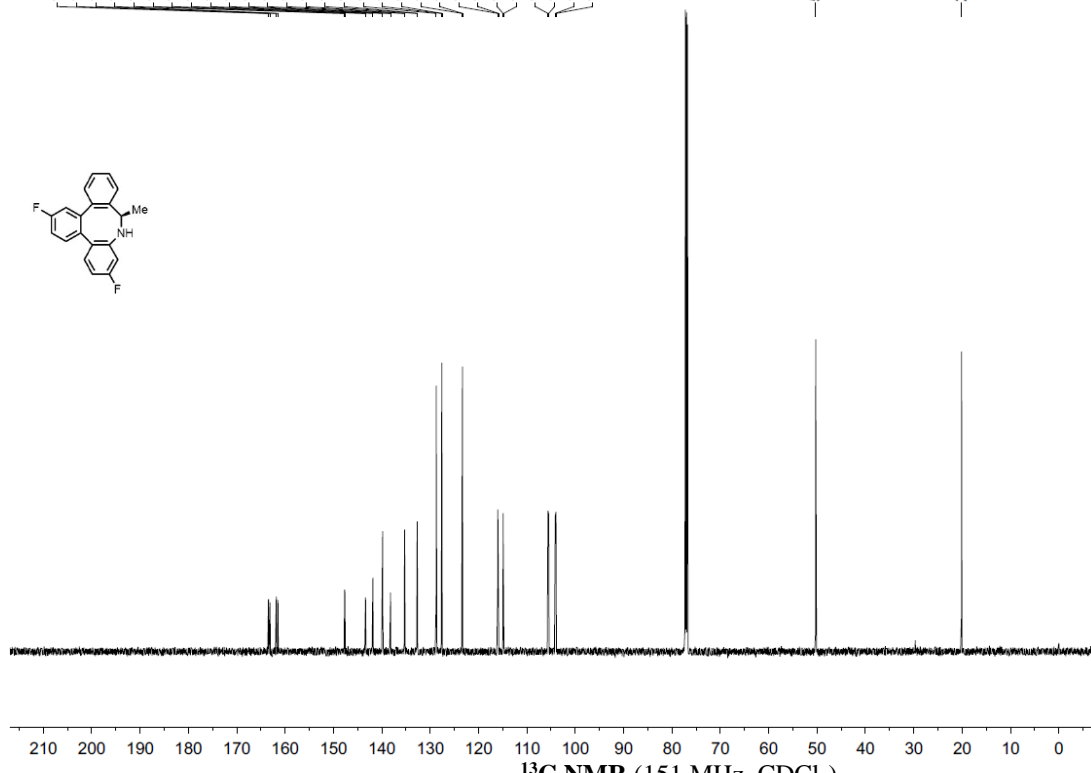

<sup>13</sup>C NMR (151 MHz, CDCl<sub>3</sub>)

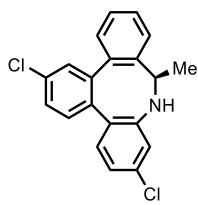

**5fa**

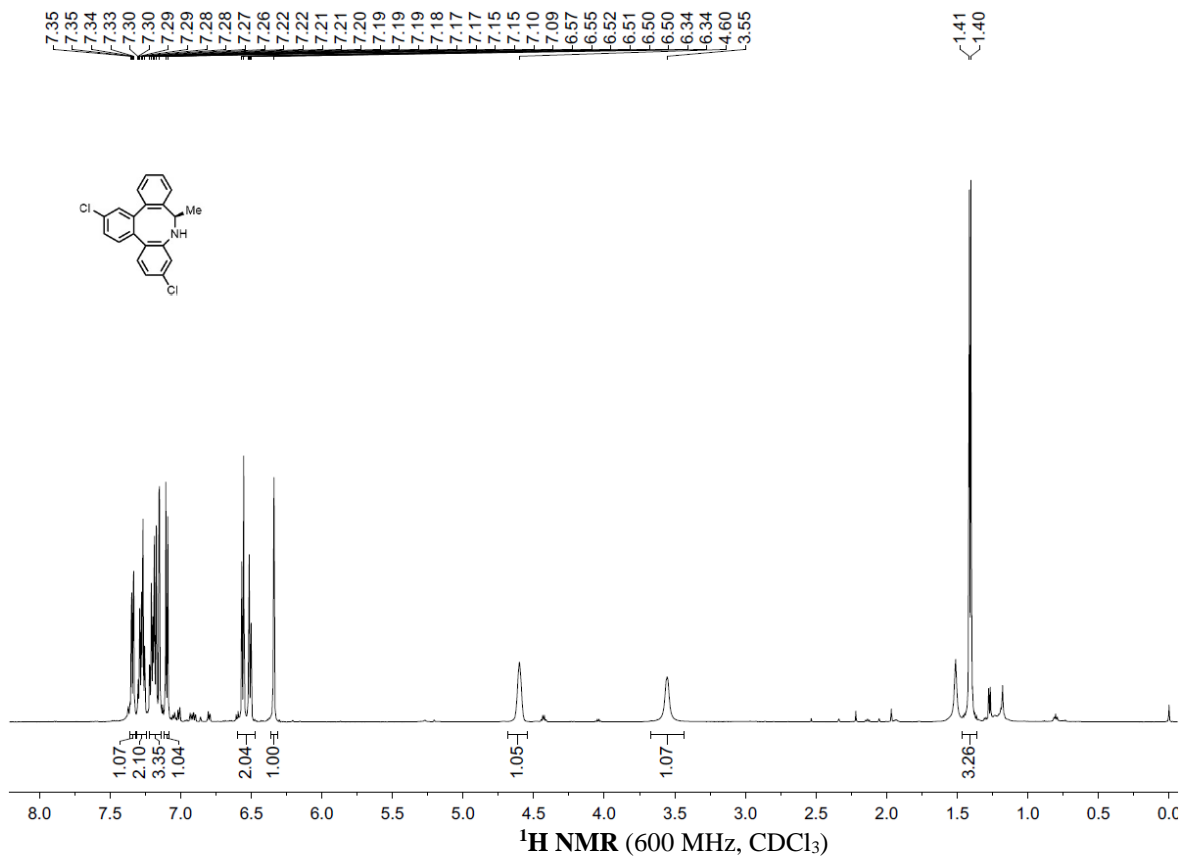

147.16  
142.95  
141.50  
140.57  
139.71  
134.81  
133.69  
133.53  
132.28  
129.01  
128.89  
128.28  
127.67  
127.60  
125.51  
123.35  
118.55  
117.42

-50.25

-20.07

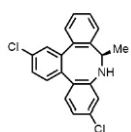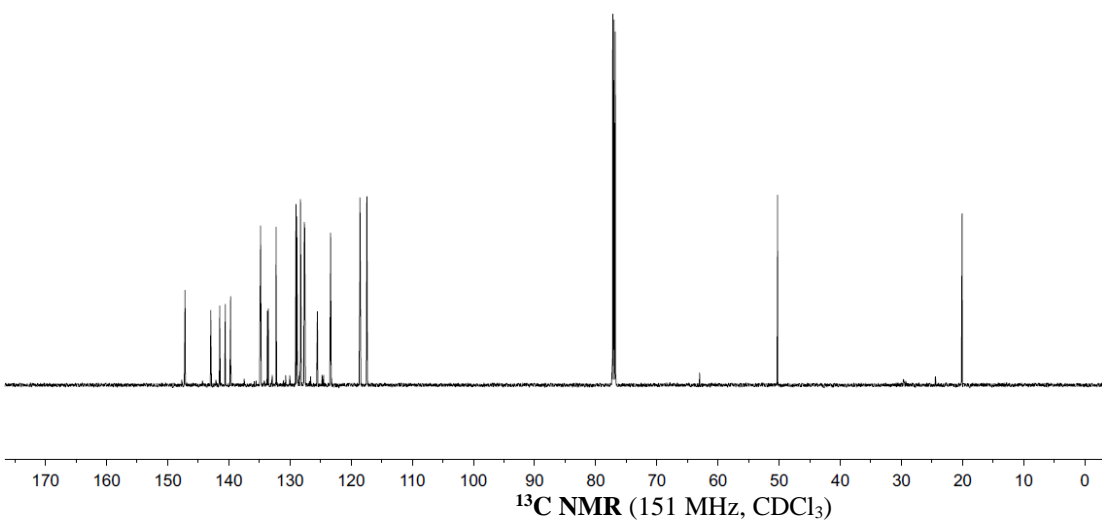

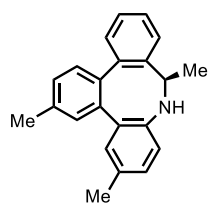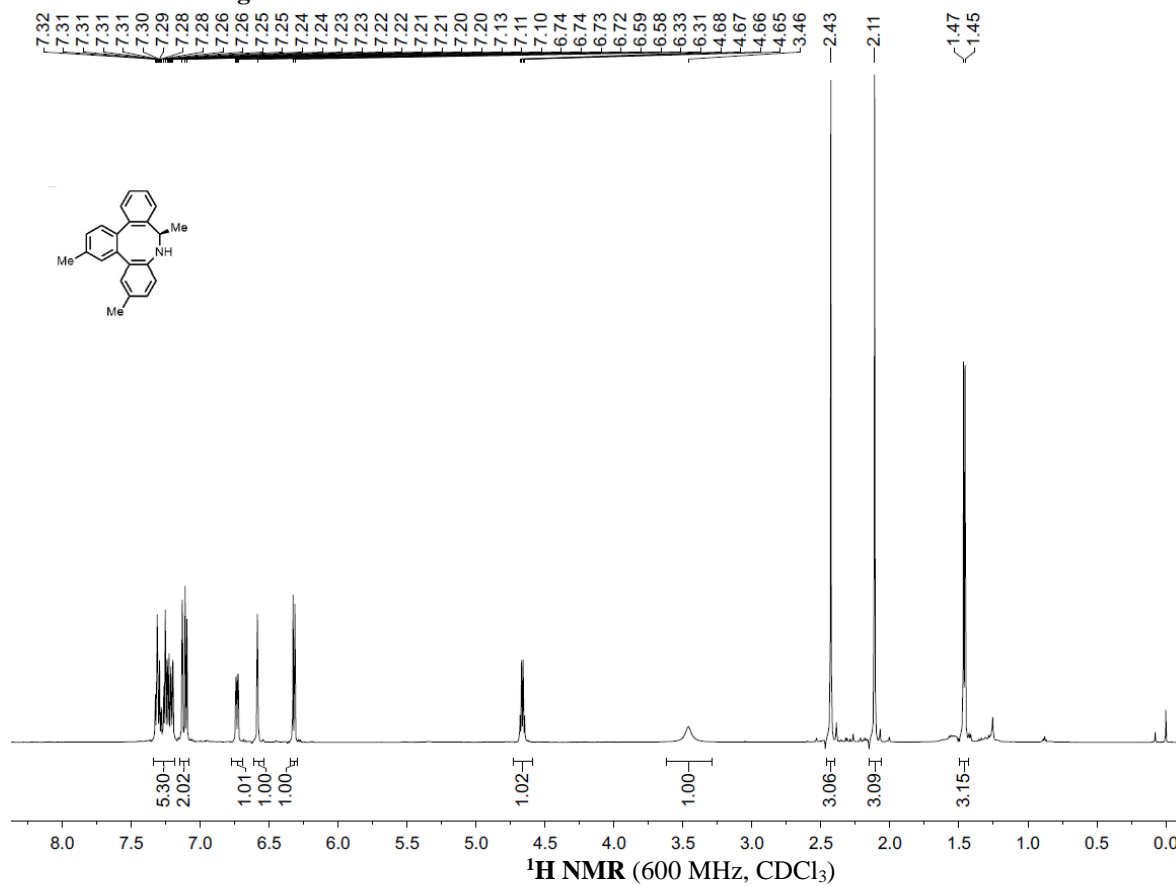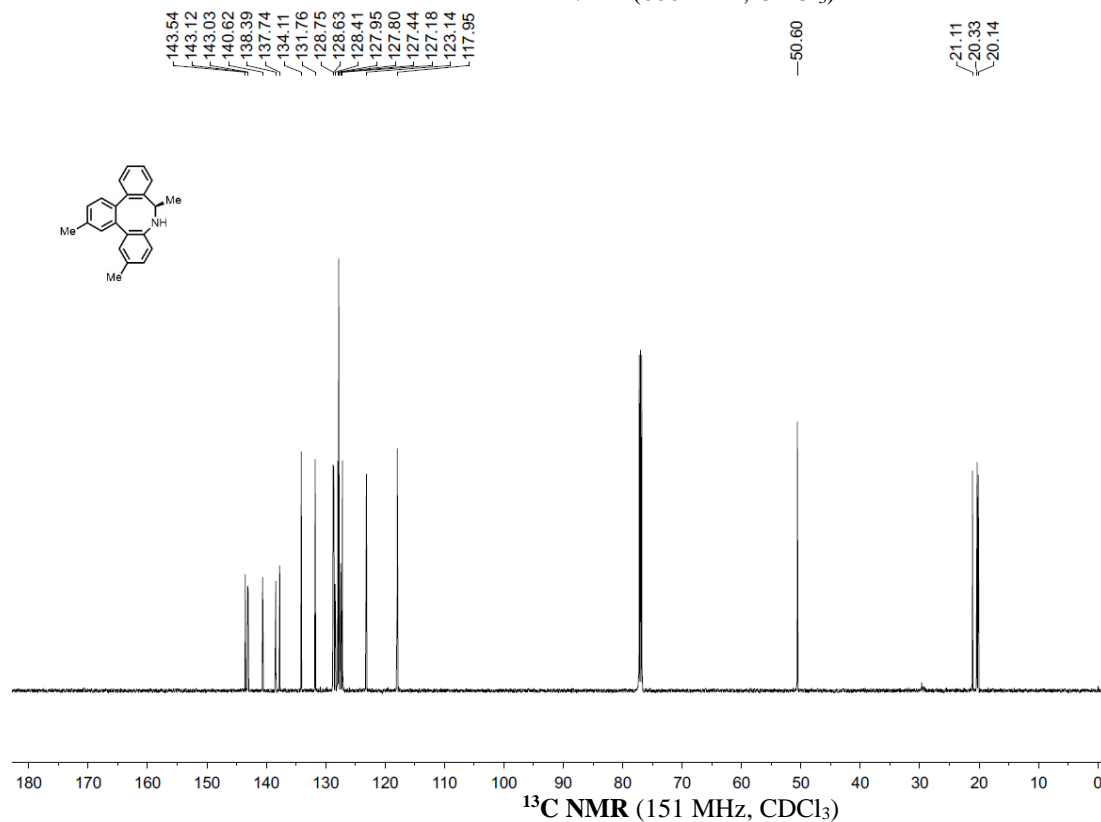

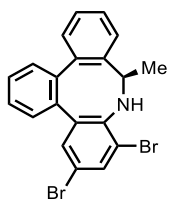

7.48  
7.48  
7.47  
7.47  
7.46  
7.46  
7.45  
7.45  
7.44  
7.44  
7.40  
7.40  
7.37  
7.36  
7.36  
7.36  
7.36  
7.35  
7.31  
7.31  
7.30  
7.30  
7.26  
7.26  
7.25  
7.25  
7.25  
7.24  
7.24  
7.24  
6.84  
6.83  
4.69  
4.68  
4.67  
4.67  
4.65  
4.64  
4.50  
4.48

1.56  
1.55

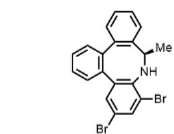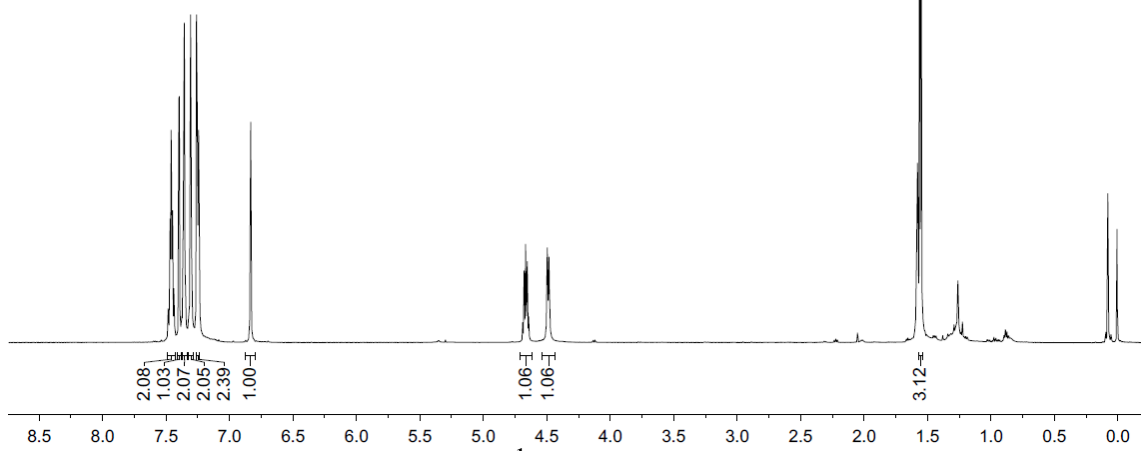

<sup>1</sup>H NMR (600 MHz, CDCl<sub>3</sub>)

142.81  
142.47  
141.19  
140.91  
139.45  
135.29  
133.49  
131.09  
130.96  
128.94  
128.64  
128.43  
128.13  
127.68  
127.53  
123.35  
112.56  
109.17

50.67

20.10

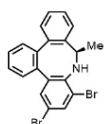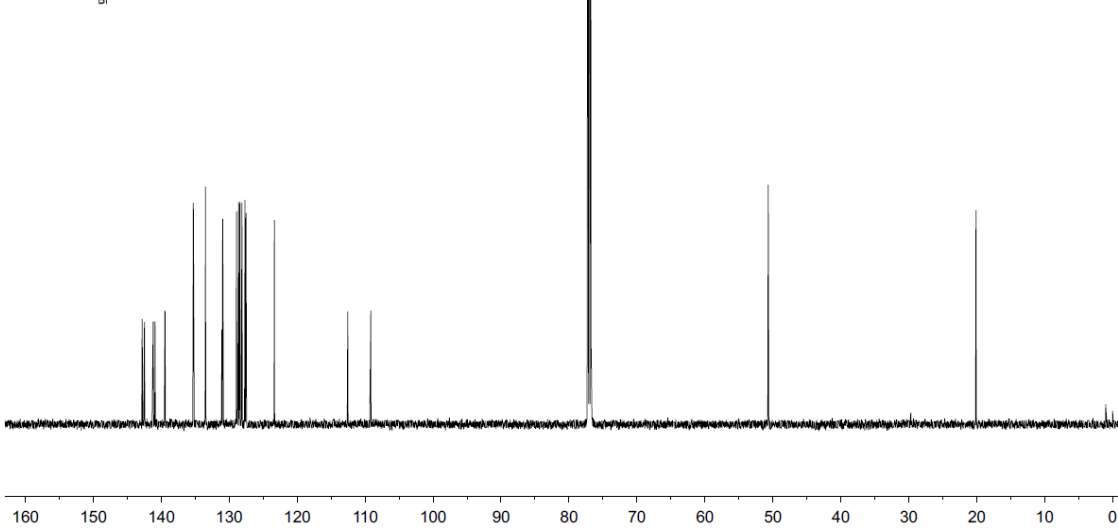

<sup>13</sup>C NMR (151 MHz, CDCl<sub>3</sub>)



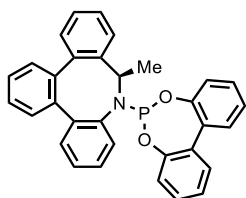

6

7.56  
7.55  
7.54  
7.54  
7.53  
7.53  
7.46  
7.45  
7.44  
7.44  
7.37  
7.37  
7.36  
7.36  
7.33  
7.32  
7.31  
7.31  
7.31  
7.30  
7.30  
7.30  
7.29  
7.29  
7.29  
7.28  
7.28  
7.28  
7.20  
7.19  
7.18  
7.17  
7.17  
7.16  
7.16  
7.14  
7.14  
7.13  
7.13  
7.12  
7.12  
7.12  
7.10  
7.09  
7.06  
7.06  
7.06  
7.04  
6.99  
6.99  
6.98  
6.96  
6.94  
6.93  
6.92  
6.91  
6.91  
1.76  
1.75

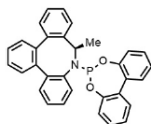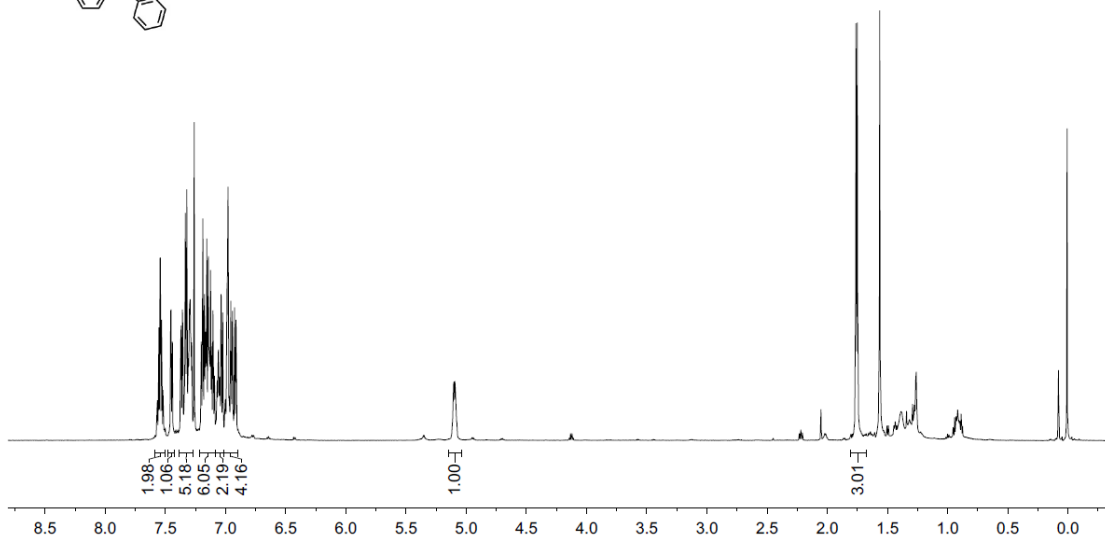

<sup>1</sup>H NMR (600 MHz, CDCl<sub>3</sub>)

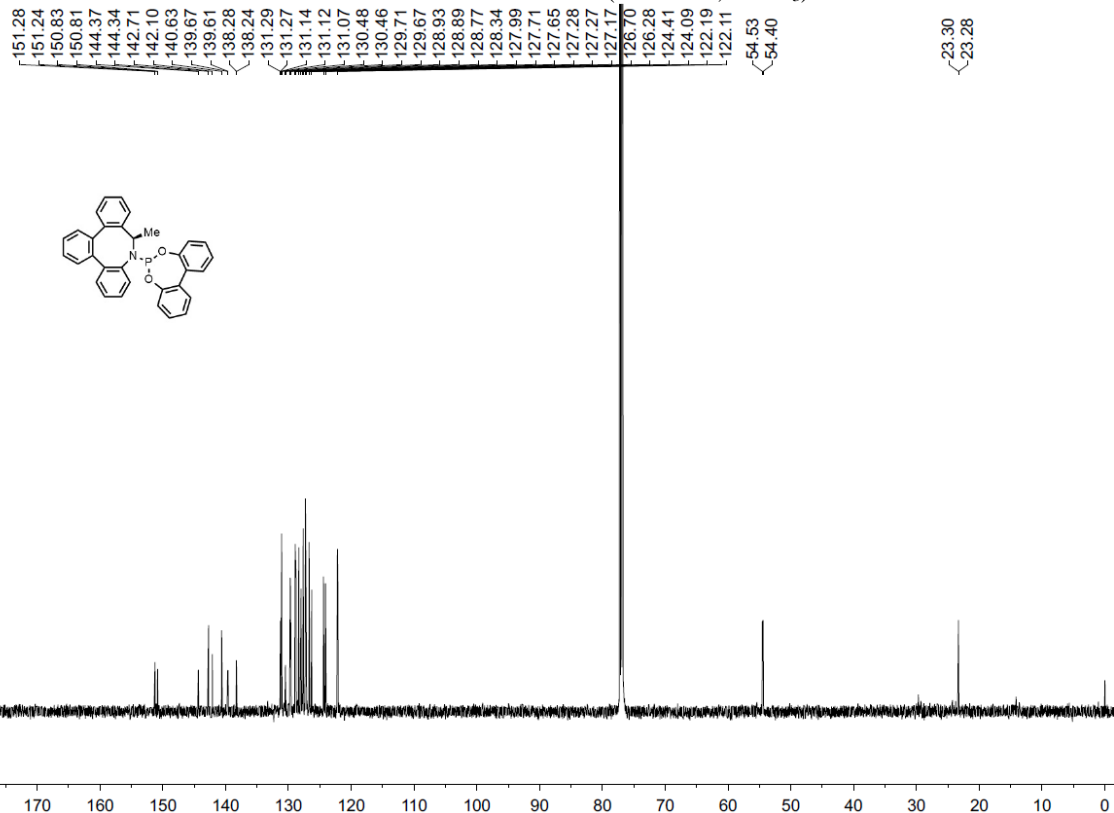

<sup>13</sup>C NMR (151 MHz, CDCl<sub>3</sub>)

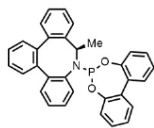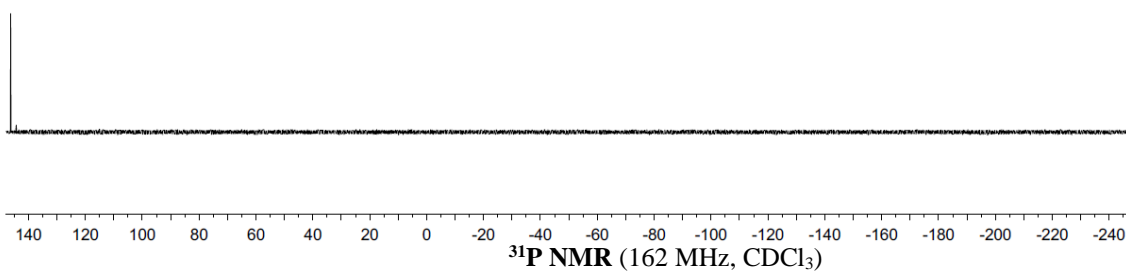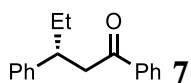

7.92  
7.90  
7.55  
7.54  
7.52  
7.45  
7.43  
7.42  
7.30  
7.29  
7.28  
7.26  
7.24  
7.23  
7.20  
7.19  
7.18

3.30  
3.29  
3.28  
3.27  
3.26  
3.25  
3.24  
1.82  
1.81  
1.81  
1.80  
1.80  
1.79  
1.78  
1.77  
1.68  
1.66  
1.65  
1.64  
1.63  
0.83  
0.81  
0.80

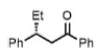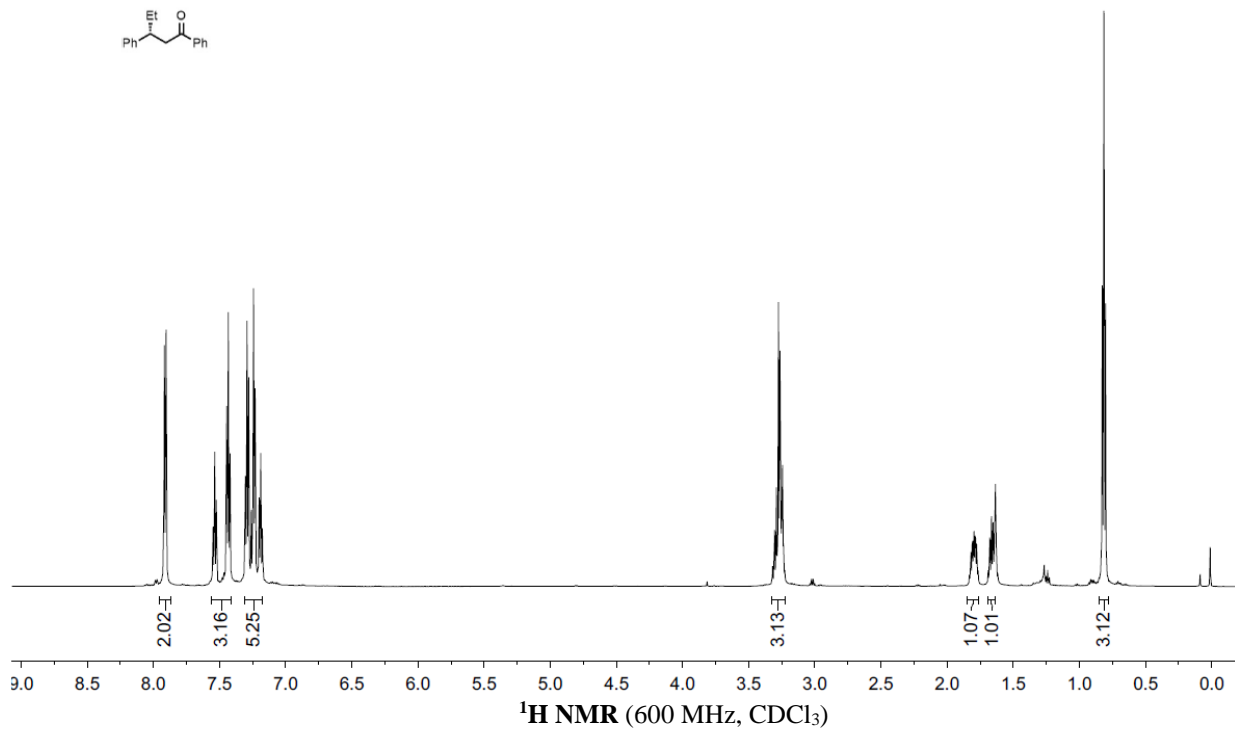

Supplement: d1cc00398d1.pdf [file d1cc00398d1.pdf]
